# Supplementary material for: Thermal State of Permafrost in the Central Andes (27° S–34° S)
Source: Copernicus journal article supplement (doi:10.5194/egusphere-2024-2244), 2024-09-30
Supplement: Supplementary file 1 [file egusphere-2024-2244-supplement.pdf]

**Table S1: Summary of Instrument Details and Available Data**

| Site | Province             | Observed Permafrost Indicators & Periglacial Landforms                               | Borehole Id. | Fig. No. | Elev (m asl) | Slope (°) | Aspect (°) | Permafrost Presence | Surface Morphology                  | Snow Site <sup>(1)</sup> | No. Sensors | Max. Sensor Depth (m) | Sensor Depths (m)                                                                                       | Sensor Model |
|------|----------------------|--------------------------------------------------------------------------------------|--------------|----------|--------------|-----------|------------|---------------------|-------------------------------------|--------------------------|-------------|-----------------------|---------------------------------------------------------------------------------------------------------|--------------|
| 1    | Atacama (Chile)      | Ground ice, rock glaciers, gelifluction slopes, sorted/patterned ground, slope creep | 1-1          | S1       | 4,680        | 9         | 11         | Not Present         | Colluvium                           | N                        | 15          | 24.9                  | 0.0, 0.2, 0.4, 0.9, 1.4, 1.9, 2.9, 4.9, 7.4, 9.9, 12.4, 14.9, 17.4, 19.9, 24.9                          | YSI 44005    |
|      |                      |                                                                                      | 1-2          | S2       | 4,705        | 12        | 150        | Possible            | Bedrock (weathered)                 | Y                        | 15          | 24.9                  | 0.0, 0.2, 0.4, 0.9, 1.4, 1.9, 2.9, 4.9, 7.4, 9.9, 12.4, 14.9, 17.4, 19.9, 24.9                          | YSI 44005    |
|      |                      |                                                                                      | 1-3          | S3       | 4,144        | 11        | 126        | Not Present         | Colluvium                           | Y                        | 15          | 25.0                  | 0.0, 0.3, 0.5, 1.0, 1.5, 2.0, 3.0, 5.0, 7.5, 10.0, 12.5, 15.0, 17.5, 20.0, 25.0                         | YSI 44005    |
|      |                      |                                                                                      | 1-4          | S4       | 4,177        | 12        | 84         | Not Present         | Old landslide deposit               | Y                        | 15          | 25.0                  | 0.0, 0.3, 0.5, 1.0, 1.5, 2.0, 3.0, 5.0, 7.5, 10.0, 12.5, 15.0, 17.5, 20.0, 25.0                         | YSI 44005    |
|      |                      |                                                                                      | 1-5          | S5       | 4,858        | 16        | 60         | Not Present         | Bedrock (highly weathered)          | Y                        | 15          | 25.2                  | 0.2, 0.4, 0.7, 1.2, 1.7, 2.2, 3.2, 5.2, 7.7, 10.2, 12.7, 15.2, 17.7, 20.2, 25.2                         | YSI 44005    |
|      |                      |                                                                                      | 1-6          | S6       | 4,838        | 18        | 62         | Not Present         | Bedrock (highly weathered: sand)    | UNK                      | 12          | 24.3                  | 0.3, 0.8, 1.3, 2.3, 4.3, 6.8, 9.3, 11.8, 14.3, 16.8, 19.3, 24.3                                         | YSI 44005    |
|      |                      |                                                                                      | 1-7          | S7       | 4,688        | 9         | 135        | Not Present         | Colluvium                           | Y                        | 15          | 25.3                  | 0.3, 0.6, 0.8, 1.3, 1.8, 2.3, 3.3, 5.3, 7.8, 10.3, 12.8, 15.3, 17.8, 20.3, 25.3                         | YSI 44005    |
|      |                      |                                                                                      | 1-8          | S8       | 5,023        | 11        | 245        | Possible            | Bedrock                             | N                        | 14          | 24.9                  | 0.1, 0.4, 0.9, 1.4, 1.9, 2.9, 4.9, 7.4, 9.9, 12.4, 14.9, 17.4, 19.9, 24.9                               | YSI 44005    |
|      |                      |                                                                                      | 1-9          | S9       | 4,855        | 10        | 234        | Not Present         | Colluvium                           | N                        | 14          | 24.8                  | 0.0, 0.3, 0.8, 1.3, 1.8, 2.8, 4.8, 7.3, 9.8, 12.3, 14.8, 17.3, 19.8, 24.8                               | YSI 44005    |
| 2    | San Juan (Argentina) | Gelifluction slopes, weakly patterned ground, rock glaciers                          | 2-1          | S10      | 5,163        | 13        | 102        | Present             | Colluvium                           | UNK                      | 15          | 40.0                  | 0.0, 0.5, 1.0, 1.5, 2.0, 3.0, 4.0, 6.0, 8.0, 10.0, 15.0, 20.0, 25.0, 30.0, 40.0                         | YSI 44007    |
|      |                      |                                                                                      | 2-2          | S11      | 5,108        | 16        | 91         | Possible            | Colluvium                           | UNK                      | 15          | 40.0                  | 0.0, 0.5, 1.0, 1.5, 2.0, 3.0, 4.0, 6.0, 8.0, 10.0, 15.0, 20.0, 25.0, 30.0, 40.0                         | YSI 44007    |
|      |                      |                                                                                      | 2-3          | S12      | 5,150        | 18        | 7          | Present             | Colluvium                           | N                        | 15          | 40.0                  | 0.0, 0.5, 1.0, 1.5, 2.0, 3.0, 4.0, 6.0, 8.0, 10.0, 15.0, 20.0, 25.0, 30.0, 40.0                         | YSI 44007    |
|      |                      |                                                                                      | 2-4          | S13      | 4,607        | 22        | 25         | Not Present         | Colluvium                           | N                        | 14          | 38.0                  | 0, 0.5, 0.9, 1.4, 1.9, 2.8, 3.8, 7.5, 9.4, 14.1, 18.8, 23.5, 28.2, 37.6                                 | YSI 44007    |
|      |                      |                                                                                      | 2-5          | S14      | 4,503        | 22        | 37         | Not Present         | Colluvium                           | N                        | 15          | 38.0                  | 0.0, 0.5, 1.0, 1.5, 2.0, 3.0, 4.0, 6.0, 8.0, 10.0, 15.0, 20.0, 25.0, 30.0, 40.0                         | YSI 44007    |
|      |                      |                                                                                      | 2-6          | S15      | 4,830        | 17        | 260        | Not Present         | Colluvium                           | UNK                      | 15          | 38.0                  | 0.0, 0.5, 0.9, 1.4, 1.9, 2.8, 3.8, 5.7, 7.6, 9.5, 14.2, 18.9, 23.6, 28.4, 37.8                          | YSI 44007    |
|      |                      |                                                                                      | 2-7          | S16      | 4,819        | 15        | 16         | Not Present         | Colluvium                           | N                        | 15          | 38.0                  | 0.0, 0.5, 0.9, 1.4, 1.9, 2.8, 3.8, 5.6, 7.5, 9.4, 14.1, 18.8, 23.5, 28.2, 37.6                          | YSI 44007    |
|      |                      |                                                                                      | 2-8          | S17      | 4,687        | 22        | 69         | Not Present         | Colluvium                           | N                        | 15          | 40.0                  | 0.0, 0.5, 1.0, 1.5, 2.0, 3.0, 4.0, 6.0, 8.0, 10.0, 15.0, 20.0, 25.0, 30.0, 40.0                         | YSI 44007    |
|      |                      |                                                                                      | 2-9          | S18      | 4,484        | 20        | 91         | Not Present         | Colluvium                           | N                        | 15          | 39.0                  | 0.0, 0.5, 1.0, 1.5, 1.9, 3.0, 3.9, 5.8, 7.7, 9.7, 14.5, 19.3, 24.2, 29.0, 38.5                          | YSI 44007    |
|      |                      |                                                                                      | 2-10         | S19      | 5,082        | 17        | 305        | Present             | Colluvium                           | N                        | 24          | 49.9                  | 0, 0.2, 0.5, 0.7, 1, 1.5, 2, 2.5, 3, 4, 5, 6, 8, 10, 12.5, 15.5, 17.5, 20, 25, 30, 35, 39.9, 44.9, 49.9 | TNode 2W-Bus |
| 3    | San Juan (Argentina) | Rock glaciers, talus slopes, ground ice, gelifluction / solifluction slopes          | 3-1          | S20      | 4,754        | 27        | 131        | Present             | Thin colluvium / weathered bedrock  | UNK                      | 15          | 72.5                  | 0.9, 1.8, 2.7, 4.5, 6.8, 9.1, 11.3, 13.6, 15.9, 18.1, 27.2, 36.3, 54.4, 54.6, 72.5                      | YSI 44007    |
|      |                      |                                                                                      | 3-2          | S21      | 5,010        | 15        | 169        | Present             | Bedrock                             | N                        | 16          | 94.0                  | 0.7, 1.7, 2.6, 4.5, 6.8, 9.2, 11.5, 13.9, 16.2, 18.6, 28.0, 37.4, 46.8, 56.2, 75.0, 93.8                | YSI44007     |
|      |                      |                                                                                      | 3-3          | S22      | 4,070        | 8         | 70         | Not Present         | Colluvium                           | UNK                      | 11          | 15.0                  | 0.0, 0.5, 1.0, 1.5, 2.0, 3.0, 4.0, 5.0, 7.5, 12.5, 15.0                                                 | YSI44007     |
|      |                      |                                                                                      | 3-5          | S23      | 4,343        | 22        | 128        | Present             | Colluvium                           | Y                        | 16          | 18.0                  | 0, 1.0, 2.0, 3.0, 4.0, 5.0, 6.0, 7.0, 8.0, 9.0, 10.0, 12.0, 14.0, 16.0, 18.0, 20.0                      | YSI44007     |
|      |                      |                                                                                      | 3-6          | S24      | 4,568        | 27        | 173        | Present             | Colluvium                           | N                        | 16          | 18.9                  | 0.3, 0.8, 1.3, 1.7, 2.2, 2.7, 3.2, 3.6, 4.1, 4.6, 6.9, 9.3, 11.7, 14.0, 16.4, 18.8                      | YSI44007     |
|      |                      |                                                                                      | 3-7          | S25      | 5,082        | 19        | 1          | Present             | Colluvium / weathered bedrock       | N                        | 10          | 20.0                  | 1.0, 2.0, 3.0, 5.0, 7.5, 10.0, 12.5, 14.9, 17.4, 19.9                                                   | YSI44007     |
|      | Atacama (Chile)      |                                                                                      | 3-8          | S26      | 4,995        | 18        | 94         | Present             | Bedrock                             | N                        | 16          | 20.0                  | 0.0, 1.0, 2.0, 3.0, 4.0, 5.0, 6.0, 7.0, 8.0, 9.0, 10.0, 12.0, 14.0, 16.0, 18.0, 20.0                    | YSI44007     |
|      |                      |                                                                                      | 3-9          | S27      | 4,794        | 24        | 297        | Present             | Bedrock                             | UNK                      | 16          | 20.0                  | 0.5, 1.0, 1.5, 2.0, 2.5, 3.0, 3.5, 4.0, 4.5, 5.0, 7.5, 10.0, 12.5, 15.0, 17.5, 20.0                     | YSI44007     |
|      |                      |                                                                                      | 3-11         | S28      | 5,251        | 19        | 95         | Present             | Bedrock                             | N                        | 16          | 20.0                  | 0.0, 1.0, 2.0, 3.0, 4.0, 5.0, 6.0, 7.0, 8.0, 9.0, 10.0, 12.0, 14.0, 16.0, 18.0, 20.0                    | YSI44007     |
|      |                      |                                                                                      | 3-12         | S29      | 5,092        | 13        | 344        | Present             | Bedrock (thin weathered overburden) | N                        | 16          | 100.0                 | 1.0, 2.0, 3.0, 5.0, 7.5, 10.0, 12.5, 15.0, 17.5, 20.0, 29.9, 39.9, 49.9, 59.9, 79.8, 99.8               | YSI44007     |

**Notes:**

1. Dampened temperature variations in winter (Y=Yes; N=No; UNK=Unknown).
2. Some values shown for depths not at 20m (i.e., maximum depth for strings < 20m, or adjusted depth to illustrate conditions within cryotic zones).

**Table S1: Summary of Instrument Details and Available Data**

| Site | Province                     | Observed Permafrost Indicators & Periglacial Landforms                                                                                                  | Borehole Id. | Fig. No. | Elev (m asl) | Slope (°) | Aspect (°) | Permafrost Presence | Surface Morphology       | Snow Site <sup>(1)</sup> | No. Sensors | Max. Sensor Depth (m) | Sensor Depths (m)                                                                                             | Sensor Model |
|------|------------------------------|---------------------------------------------------------------------------------------------------------------------------------------------------------|--------------|----------|--------------|-----------|------------|---------------------|--------------------------|--------------------------|-------------|-----------------------|---------------------------------------------------------------------------------------------------------------|--------------|
| 4    | San Juan (Argentina)         | Rock glaciers, protalus ramparts, gelifluction / solifluction slopes,                                                                                   | 4-1          | S30      | 4,396        | 15        | 81         | Not Present         | Colluvium                | N                        | 19          | 25.0                  | 0.0, 0.5, 1.0, 1.5, 2.0, 2.5, 3.0, 4.0, 5.0, 6.0, 7.0, 9.0, 11.0, 13.0, 15.0, 17.0, 19.0, 21.0, 23.0, 25.0    | TNode EX     |
|      |                              |                                                                                                                                                         | 4-2          | S31      | 4,438        | 23        | 152        | Possible            | Colluvium                | N                        | 19          | 25.0                  | 0.0, 0.5, 1.0, 1.5, 2.0, 2.5, 3.0, 4.0, 5.0, 6.0, 7.0, 9.0, 11.0, 13.0, 15.0, 17.0, 19.0, 21.0, 23.0, 25.0    | TNode EX     |
|      |                              |                                                                                                                                                         | 4-3          | S32      | 3,935        | 15        | 71         | Not Present         | Colluvium                | N                        | 19          | 25.0                  | 0.5, 1.0, 1.5, 2.0, 2.5, 3.0, 4.0, 5.0, 6.0, 7.0, 9.0, 11.0, 13.0, 15.0, 17.0, 19.0, 21.0, 23.0, 25.0         | TNode EX     |
| 5    | Coquimbo (Chile)             | Massive ground ice, sorted/patterned ground, slope creep, active layer detachment, gelifluction / solifluction slopes, protalus ramparts, rock glaciers | 5-1          | S33      | 4,970        | 20        | 293        | Present             | Colluvium (thin veneer)  | N                        | 9           | 9.4                   | 0, 0.5, 0.9, 1.4, 2.8, 4.2, 5.6, 7.5, 9.4                                                                     | YSI44007     |
|      |                              |                                                                                                                                                         | 5-2          | S34      | 5,023        | 12        | 272        | Present             | Colluvium (thin veneer)  | N                        | 13          | 46.0                  | 0.0, 0.9, 1.9, 3.8, 6.1, 8.5, 10.8, 13.2, 17.9, 22.6, 27.3, 36.6, 46.0                                        | YSI44007     |
|      |                              |                                                                                                                                                         | 5-3          | S35      | 4,928        | 20        | 244        | Present             | Colluvium (thin veneer)  | N                        | 15          | 47.7                  | 0, 0.5, 1, 1.9, 2.9, 4.8, 7.2, 9.5, 11.9, 14.3, 19.1, 23.9, 28.6, 38.2, 47.7                                  | YSI44007     |
|      | San Juan (Argentina)         |                                                                                                                                                         | 5-4          | S36      | 4,810        | 17        | 343        | Present             | Highly weathered bedrock | N                        | 16          | 30.0                  | 0.0, 0.5, 1.0, 1.5, 2.0, 3.0, 4.0, 5.0, 6.0, 8.0, 10.0, 12.5, 15.0, 20.0, 25.0, 30.0                          | RST TH0022   |
|      |                              |                                                                                                                                                         | 5-5          | S37      | 5,036        | 21        | 99         | Possible            | Bedrock (weathered)      | Y                        | 16          | 30.0                  | 0.0, 0.5, 1.0, 1.5, 2.0, 3.0, 4.0, 5.0, 6.0, 8.0, 10.0, 12.5, 15.0, 20.0, 25.0, 30.0                          | RST TH0022   |
| 6    | Coquimbo (Chile)             | Rock glaciers, talus slopes, ground ice, gelifluction / solifluction slopes                                                                             | 6-1          | S38      | 3,694        | 19        | 241        | Present             | Active Rock Glacier      | N                        | 15          | 27.7                  | 0.2, 0.7, 1.2, 2.2, 3.2, 5.2, 7.7, 10.2, 12.7, 15.2, 17.7, 20.2, 22.7, 25.2, 27.7                             | YSI4007      |
|      |                              |                                                                                                                                                         | 6-2          | S39      | 3,840        | 28        | 269        | Present             | Active Rock Glacier      | N                        | 15          | 28.1                  | 0.1, 0.6, 1.1, 2.1, 3.1, 5.1, 7.6, 10.1, 12.6, 15.1, 18.1, 20.1, 23.1, 25.1, 28.1                             | YSI2007      |
|      |                              |                                                                                                                                                         | 6-4          | S40      | 3,791        | 20        | 191        | Present             | Rock Glacier             | N                        | 15          | 35.0                  | 0.0, 0.5, 1.0, 2.0, 3.0, 5.0, 7.5, 10.0, 12.5, 15.0, 17.5, 20.0, 25.0, 30.0, 35.0                             | YSI2007      |
|      |                              |                                                                                                                                                         | 6-5          | S41      | 3,724        | 19        | 143        | Not Present         | Rock Glacier             | N                        | 15          | 34.0                  | 0.0, 0.5, 1.0, 2.0, 3.0, 5.0, 7.5, 10.0, 12.5, 15.0, 20.0, 25.0, 29.2, 30.0, 34.0                             | YSI2007      |
|      |                              |                                                                                                                                                         | 6-7          | S42      | 3,625        | 9         | 70         | Not Present         | Glacial Deposits         | N                        | 15          | 34.0                  | 0.2, 0.7, 1.2, 2.2, 3.2, 5.2, 7.7, 10.2, 12.7, 15.2, 20.2, 25.2, 30.2, 32.7, 35.2                             | YSI2007      |
|      |                              |                                                                                                                                                         | 6-8          | S43      | 3,684        | 27        | 239        | Possible            | Rock Glacier             | Y                        | 15          | 21.5                  | 0, 0.5, 1, 2, 3, 5, 7.5, 10, 12.5, 13.5, 15, 17.9, 18.5, 20, 21.5                                             | YSI2007      |
|      |                              |                                                                                                                                                         | 6-11         | S44      | 3,684        | 27        | 237        | Possible            | Rock Glacier             | N                        | 20          | 24.0                  | 0.0, 0.5, 1.0, 1.5, 2.0, 2.5, 3.0, 4.0, 5.0, 6.0, 7.0, 8.5, 10.0, 12.0, 14.0, 16.0, 18.0, 20.0, 22.0, 24.0    | TNode EX     |
| 7    | San Juan (Argentina)         | Rock glaciers, protalus ramparts, gelifluction / solifluction slopes, ground ice                                                                        | 7-1          | S45      | 3,803        | 9         | 20         | Not Present         | Colluvium                | Y                        | 13          | 29.0                  | 0.0, 0.3, 0.5, 1.0, 1.5, 2.0, 4.0, 7.0, 10.0, 15.0, 20.0, 25.0, 29.0                                          | YSI44007     |
|      |                              |                                                                                                                                                         | 7-2          | S46      | 3,928        | 28        | 194        | Present             | Bedrock                  | Y                        | 13          | 40.0                  | 0.0, 0.3, 0.5, 1.0, 1.5, 2.0, 4.0, 7.0, 10.0, 15.0, 20.0, 30.0, 40.0                                          | YSI44007     |
|      |                              |                                                                                                                                                         | 7-3          | S47      | 4,029        | 29        | 124        | Not Present         | Colluvium (thin veneer)  | Y                        | 13          | 40.0                  | 0.0, 0.3, 0.5, 1.0, 1.5, 2.0, 4.0, 7.0, 10.0, 15.0, 20.0, 30.0, 40.0                                          | YSI44007     |
|      |                              |                                                                                                                                                         | 7-4          | S48      | 3,820        | 23        | 195        | Possible            | Rock Glacier             | N                        | 20          | 34.8                  | 0.0, 0.5, 1.0, 1.5, 2.0, 3.0, 4.0, 5.0, 7.5, 10.0, 12.5, 15.0, 17.5, 20.0, 22.5, 25.0, 27.5, 30.0, 34.8, 32.5 | TNode EX     |
|      |                              |                                                                                                                                                         | 7-5          | S49      | 3,835        | 24        | 204        | Possible            | Rock Glacier             | N                        | 20          | 30.0                  | 0.0, 0.5, 1.0, 1.5, 2.0, 3.0, 4.0, 5.0, 7.5, 10.0, 12.5, 15.0, 17.5, 20.0, 22.5, 25.0, 27.5, 30.0, 26.0, 21.0 | TNode EX     |
|      |                              |                                                                                                                                                         | 7-6          | S50      | 3,794        | 22        | 194        | Possible            | Rock Glacier             | N                        | 20          | 27.1                  | 0.0, 0.5, 1.0, 1.5, 2.0, 3.0, 4.0, 5.0, 7.5, 10.0, 12.5, 15.0, 17.5, 20.0, 22.5, 25.0, 27.1, 26.1, 21.1, 16.1 | TNode EX     |
| 8    | Región Metropolitana (Chile) | Rock glaciers, gelifluction / solifluction slopes, ground ice                                                                                           | 8-1          | S51      | 3,627        | 12        | 271        | Not Present         | Colluvium                | Y                        | 15          | 90.3                  | 0.3, 0.8, 1.3, 2.3, 4.3, 6.3, 8.3, 10.3, 15.3, 20.3, 30.3, 45.3, 60.3, 75.3, 90.3                             | YSI44007     |
|      |                              |                                                                                                                                                         | 8-2          | S52      | 4,080        | 18        | 306        | Not Present         | Colluvium                | Y                        | 12          | 87.7                  | 0.0, 1.7, 3.7, 5.7, 7.7, 12.7, 17.7, 27.7, 42.7, 57.7, 72.7, 87.7                                             | YSI44007     |
|      |                              |                                                                                                                                                         | 8-3          | S53      | 4,261        | 24        | 258        | Not Present         | Colluvium                | Y                        | 15          | 35.0                  | 0.0, 0.5, 1.0, 2.0, 4.0, 6.0, 8.0, 10.0, 15.0, 20.0, 30.0, 35.0, 45.0, 50.0, 60.0                             | YSI44007     |

**Notes:**

1. Dampened temperature variations in winter (Y=Yes; N=No; UNK=Unknown).
2. Some values shown for depths not at 20m (i.e., maximum depth for strings < 20m, or adjusted depth to illustrate conditions within cryotic zones).

Table S1: Summary of Instrument Details and Available Data

| Site | Province             | Observed Permafrost Indicators & Periglacial Landforms                               | Borehole Id. | Fig. No. | Data Availability Range                                                                                                     | Approx. DZAA (Sensor Depth, m)                                                                     | Representative Ground Temperature <sup>(2)</sup> |         |                  | Estimated Temperature Trend <sup>(2)</sup> |                | Max. Estimated Depth to Permafrost |            | Approx. Permafrost Thickness (m)      | Apparent Secular Warming / Cooling (°C) |      |
|------|----------------------|--------------------------------------------------------------------------------------|--------------|----------|-----------------------------------------------------------------------------------------------------------------------------|----------------------------------------------------------------------------------------------------|--------------------------------------------------|---------|------------------|--------------------------------------------|----------------|------------------------------------|------------|---------------------------------------|-----------------------------------------|------|
|      |                      |                                                                                      |              |          |                                                                                                                             |                                                                                                    | Month / Year                                     | (°C)    | Sensor Depth (m) | (°C / yr)                                  | r <sup>2</sup> | Date                               | Depth (m)  |                                       |                                         |      |
| 1    | Atacama (Chile)      | Ground ice, rock glaciers, gelifluction slopes, sorted/patterned ground, slope creep | 1-1          | S1       | 15/02/2010 - 01/05/2011                                                                                                     | 9.9                                                                                                | 05/2011                                          | 1.7     | 19.9             | --                                         | --             | --                                 | --         | --                                    | --                                      |      |
|      |                      |                                                                                      | 1-2          | S2       | 26/01/2010 - 01/05/2011                                                                                                     | 4.9                                                                                                | 05/2011                                          | -0.2    | 19.9             | --                                         | --             | 31/03/2011                         | 1.8        | 40                                    | --                                      |      |
|      |                      |                                                                                      | 1-3          | S3       | 30/03/2010 - 09/10/2010                                                                                                     | 17.5                                                                                               | 10/2010                                          | 7.4     | 20.0             | --                                         | --             | --                                 | --         | --                                    | --                                      |      |
|      |                      |                                                                                      | 1-4          | S4       | 30/03/2010 - 09/10/2010                                                                                                     | 17.5                                                                                               | 10/2010                                          | 6.3     | 20.0             | --                                         | --             | --                                 | --         | --                                    | --                                      |      |
|      |                      |                                                                                      | 1-5          | S5       | 14/03/2010 - 28/05/2010                                                                                                     | 5.2                                                                                                | 05/2010                                          | 1.6     | 20.2             | --                                         | --             | --                                 | --         | --                                    | --                                      |      |
|      |                      |                                                                                      | 1-6          | S6       | 14/03/2010 - 10/10/2010                                                                                                     | 9.3                                                                                                | 10/2010                                          | 3.3     | 19.3             | --                                         | --             | --                                 | --         | --                                    | --                                      |      |
|      |                      |                                                                                      | 1-7          | S7       | 26/03/2010 - 03/05/2011                                                                                                     | 12.8                                                                                               | 05/2011                                          | 1.3     | 20.3             | --                                         | --             | --                                 | --         | --                                    | --                                      |      |
|      |                      |                                                                                      | 1-8          | S8       | 30/03/2010 - 03/05/2011                                                                                                     | 9.9                                                                                                | 05/2011                                          | -2.2    | 19.9             | --                                         | --             | 22/02/2011                         | 1.1        | 160                                   | --                                      |      |
|      |                      |                                                                                      | 1-9          | S9       | 06/04/2010 - 03/05/2011                                                                                                     | 14.8                                                                                               | 05/2011                                          | 1.2     | 19.8             | --                                         | --             | --                                 | --         | --                                    | --                                      |      |
| 2    | San Juan (Argentina) | Gelifluction slopes, weakly patterned ground, rock glaciers                          | 2-1          | S10      | 01/02/2015 - 12/07/2015; 20/01/2017 - 18/05/2017                                                                            | 20.0                                                                                               | 05/2017                                          | -4.3    | 20.0             | -0.01                                      | 0.61           | 20/01/2017                         | 0.8        | > 500                                 | -0.2                                    |      |
|      |                      |                                                                                      | 2-2          | S11      | 01/02/2016 - 12/07/2016                                                                                                     | 15.0                                                                                               | 07/2016                                          | -3.0    | 20.0             | --                                         | --             | --                                 | --         | N/A - Cooling with Depth              | 0.1                                     |      |
|      |                      |                                                                                      | 2-3          | S12      | 03/03/2017 - 18/05/2017; 17/03/2018 - 05/03/2020                                                                            | 20.0                                                                                               | 03/2020                                          | -3.3    | 20.0             | 0.00                                       | 0.03           | 25/01/2019                         | 1.3        | > 500                                 | 0.0                                     |      |
|      |                      |                                                                                      | 2-4          | S13      | 22/01/2017 - 07/02/2018                                                                                                     | 18.8                                                                                               | 02/2018                                          | 4.7     | 18.8             | --                                         | --             | --                                 | --         | --                                    | --                                      |      |
|      |                      |                                                                                      | 2-5          | S14      | 14/04/2014 - 29/11/2015; 13/02/2016 - 22/12/2016; 22/01/2017 - 15/02/2019                                                   | --                                                                                                 | 02/2019                                          | 3.2     | 25.0             | -0.09                                      | 0.75           | --                                 | --         | --                                    | --                                      | 0.1  |
|      |                      |                                                                                      | 2-6          | S15      | 16/02/2019 - 03/05/2019; 28/04/2020 - 19/05/2020                                                                            | --                                                                                                 | 05/2019                                          | 0.8     | 18.9             | --                                         | --             | --                                 | --         | --                                    | --                                      | --   |
|      |                      |                                                                                      | 2-7          | S16      | 18/03/2019 - 05/03/2020; 06/03/2021 - 11/06/2021                                                                            | 14.0                                                                                               | 06/2021                                          | 1.7     | 18.8             | --                                         | --             | --                                 | --         | --                                    | --                                      | -1.1 |
|      |                      |                                                                                      | 2-8          | S17      | 18/01/2014 - 02/09/2014; 29/09/2014 - 22/10/2014; 26/01/2017 - 16/12/2018                                                   | 20.0                                                                                               | 12/2018                                          | 1.3     | 20.0             | 0.01                                       | 0.23           | --                                 | --         | --                                    | --                                      | 0.1  |
|      |                      |                                                                                      | 2-9          | S18      | 15/04/2014 - 04/12/2015; 21/01/2017 - 26/03/2020                                                                            | 19.3                                                                                               | 03/2020                                          | 2.3     | 19.3             | -0.02                                      | 0.48           | --                                 | --         | --                                    | --                                      | -0.3 |
|      |                      |                                                                                      | 2-10         | S19      | 17/03/2019 - 10/09/2021                                                                                                     | 20.0                                                                                               | 09/2021                                          | -3.8    | 20.0             | 0.03                                       | 0.84           | 19/01/2020                         | 1.7        | 420                                   | 0.3                                     |      |
| 3    | San Juan (Argentina) | Rock glaciers, talus slopes, ground ice, gelifluction / solifluction slopes          | 3-1          | S20      | 27/01/2007 - 22/04/2007; 04/05/2007 - 10/11/2007; 01/01/2008 - 17/04/2008; 02/03/2013 - 09/06/2013; 17/03/2014 - 20/10/2014 | 18.1                                                                                               | 12/2014                                          | -1.2    | 18.1             | 0.01                                       | 0.20           | 26/03/2007                         | 3.5        | 100                                   | 0.3                                     |      |
|      |                      |                                                                                      | 3-2          | S21      | 10/11/2012 - 08/01/2014; 16/03/2014 - 30/04/2015; 01/05/2016 - 08/03/2017                                                   | 18.6                                                                                               | 03/2017                                          | -4.9    | 18.6             | 0.01                                       | 0.90           | 14/02/2016                         | 1.0        | > 500                                 | 0.2                                     |      |
|      |                      |                                                                                      | 3-3          | S22      | 17/03/2012 - 05/04/2012                                                                                                     | 3.0                                                                                                | 04/2012                                          | 4.4     | 15.0             | --                                         | --             | --                                 | --         | --                                    | --                                      |      |
|      |                      |                                                                                      | 3-5          | S23      | 02/03/2013 - 18/03/2018                                                                                                     | 6.0                                                                                                | 03/2018                                          | -0.04   | 7.0              | -0.04                                      | 0.82           | 12/03/2017                         | 6.0        | ~2 m (from 6-8 m below ground)        | --                                      |      |
|      |                      |                                                                                      | 3-6          | S24      | 18/04/2006 - 26/03/2008; 17/12/2009 - 17/04/2012; 21/02/2013 - 07/01/2014; 16/03/2014 - 15/04/2014                          | 14.0                                                                                               | 12/2014                                          | -1.5    | 18.8             | 0.00                                       | 0.17           | 03/04/2007                         | 3.5        | N/A - Cooling with depth / Isothermal | --                                      |      |
|      |                      |                                                                                      | 3-7          | S25      | 22/04/2006 - 26/03/2008                                                                                                     | 10.0                                                                                               | 03/2008                                          | -5.2    | 19.9             | 0.02                                       | 0.71           | --                                 | < 1m       | N/A - Cooling with Depth              | --                                      |      |
|      | Atacama (Chile)      |                                                                                      |              | 3-8      | S26                                                                                                                         | 18/02/2013 - 06/03/2018; 23/02/2019 - 08/05/2019                                                   | --                                               | 05/2019 | -4.9             | 20.0                                       | 0.00           | 0.12                               | 23/02/2019 | 0.8                                   | N/A - Cooling with Depth                | --   |
|      |                      |                                                                                      |              | 3-9      | S27                                                                                                                         | 18/04/2006 - 03/04/2007; 09/09/2007 - 26/03/2008; 04/12/2009 - 01/02/2010; 17/10/2010 - 01/02/2012 | --                                               | 02/2012 | -2.9             | 20.0                                       | 0.00           | 0.19                               | 17/03/2011 | 0.9                                   | 180                                     | --   |
|      |                      |                                                                                      |              | 3-11     | S28                                                                                                                         | 02/03/2013 - 06/03/2018; 23/02/2019 - 21/03/2022                                                   | --                                               | 03/2022 | -6.9             | 20.0                                       | 0.01           | 0.60                               | 24/12/2021 | 0.6                                   | 470                                     | --   |
|      |                      |                                                                                      |              | 3-12     | S29                                                                                                                         | 18/04/2006 - 06/05/2007; 25/10/2007 - 26/03/2008; 04/12/2009 - 17/12/2011                          | 20.0                                             | 12/2011 | -5.5             | 20.0                                       | 0.00           | 0.01                               | --         | < 1m                                  | 280                                     | 0.1  |

Notes:

1. Dampened temperature variations in winter (Y=Yes; N=No; UNK=Unknown).
2. Some values shown for depths not at 20m (i.e., maximum depth for strings < 20m, or adjusted depth to illustrate conditions within cryotic zones).

**Table S1: Summary of Instrument Details and Available Data**

| Site | Province                     | Observed Permafrost Indicators & Periglacial Landforms                                                                                                  | Borehole Id. | Fig. No. | Data Availability Range                                                                            | Approx. DZAA (Sensor Depth, m) | Representative Ground Temperature <sup>(2)</sup> |      |                  | Estimated Temperature Trend <sup>(2)</sup> |                | Max. Estimated Depth to Permafrost |           | Approx. Permafrost Thickness (m)     | Apparent Secular Warming / Cooling (°C) |
|------|------------------------------|---------------------------------------------------------------------------------------------------------------------------------------------------------|--------------|----------|----------------------------------------------------------------------------------------------------|--------------------------------|--------------------------------------------------|------|------------------|--------------------------------------------|----------------|------------------------------------|-----------|--------------------------------------|-----------------------------------------|
|      |                              |                                                                                                                                                         |              |          |                                                                                                    |                                | Month / Year                                     | (°C) | Sensor Depth (m) | (°C / yr)                                  | r <sup>2</sup> | Date                               | Depth (m) |                                      |                                         |
| 4    | San Juan (Argentina)         | Rock glaciers, protalus ramparts, gelifluction / solifluction slopes,                                                                                   | 4-1          | S30      | 01/12/2021 - 13/09/2022                                                                            | 21.0                           | 09/2022                                          | 3.5  | 21.0             | --                                         | --             | --                                 | --        | --                                   | --                                      |
|      |                              |                                                                                                                                                         | 4-2          | S31      | 01/12/2021 - 13/09/2022                                                                            | 11.0                           | 09/2022                                          | -0.3 | 21.0             | --                                         | --             | --                                 | --        | N/A -Cooling with depth / Isothermal | --                                      |
|      |                              |                                                                                                                                                         | 4-3          | S32      | 21/05/2021 - 14/09/2022                                                                            | 21.0                           | 09/2022                                          | 3.4  | 21.0             | --                                         | --             | --                                 | --        | --                                   | --                                      |
| 5    | Coquimbo (Chile)             | Massive ground ice, sorted/patterned ground, slope creep, active layer detachment, gelifluction / solifluction slopes, protalus ramparts, rock glaciers | 5-1          | S33      | 30/01/2014 - 05/09/2015                                                                            | --                             | 09/2015                                          | -2.2 | 9.4              | --                                         | --             | 12/03/2015                         | 0.9       | N/A -Cooling with depth / Isothermal | --                                      |
|      |                              |                                                                                                                                                         | 5-2          | S34      | 12/03/2017 - 18/01/2018; 12/03/2019 - 19/01/2020; 18/03/2020 - 25/01/2021; 24/03/2021 - 25/03/2022 | 22.6                           | 03/2022                                          | -4.2 | 22.6             | 0.01                                       | 0.74           | 17/02/2022                         | 1.8       | 150                                  | 0.3                                     |
|      |                              |                                                                                                                                                         | 5-3          | S35      | 13/03/2017 - 19/01/2018; 12/03/2019 - 19/01/2020; 18/03/2020 - 25/01/2021                          | 9.5                            | 01/2021                                          | -3.4 | 19.1             | -0.01                                      | 0.05           | 19/02/2020                         | 1.5       | 130                                  | 0.3                                     |
|      | San Juan (Argentina)         |                                                                                                                                                         | 5-4          | S36      | 18/03/2017 - 21/04/2021                                                                            | --                             | 04/2021                                          | -1.6 | 25.0             | 0.05                                       | 0.92           | 14/03/2020                         | 1.7       | 120                                  | --                                      |
|      |                              |                                                                                                                                                         | 5-5          | S37      | 17/03/2017 - 25/12/2017                                                                            | --                             | 12/2017                                          | -4.1 | 20.0             | --                                         | --             | --                                 | --        | N/A - Cooling with Depth             | --                                      |
| 6    | Coquimbo (Chile)             | Rock glaciers, talus slopes, ground ice, gelifluction / solifluction slopes                                                                             | 6-1          | S38      | 03/04/2016 - 25/09/2021                                                                            | 5.2                            | 06/2021                                          | -0.1 | 20.2             | 0.01                                       | 0.47           | 02/06/2021                         | 9.0       | N/A -Cooling with depth / Isothermal | --                                      |
|      |                              |                                                                                                                                                         | 6-2          | S39      | 05/04/2016 - 28/10/2021                                                                            | 7.6                            | 09/2021                                          | -0.1 | 10.1             | 0.01                                       | 0.31           | 11/05/2021                         | 7.3       | 10                                   | --                                      |
|      |                              |                                                                                                                                                         | 6-4          | S40      | 15/03/2016 - 27/10/2021                                                                            | --                             | 10/2021                                          | -0.1 | 30.0             | 0.03                                       | 0.77           | 10/07/2021                         | 17.4      | N/A -Cooling with depth / Isothermal | --                                      |
|      |                              |                                                                                                                                                         | 6-5          | S41      | 01/06/2016 - 27/10/2021                                                                            | 10.0                           | 10/2021                                          | 0.2  | 15.0             | -0.02                                      | 0.07           | --                                 | --        | 25                                   | --                                      |
|      |                              |                                                                                                                                                         | 6-7          | S42      | 30/04/2016 - 30/10/2021                                                                            | 20.2                           | 08/2021                                          | 5.4  | 20.2             | 0.02                                       | 0.32           | --                                 | --        | --                                   | 0.9                                     |
|      |                              |                                                                                                                                                         | 6-8          | S43      | 15/03/2016 - 09/04/2017                                                                            | 7.5                            | 04/2017                                          | 0.0  | 7.5              | --                                         | --             | --                                 | --        | 10                                   | --                                      |
|      |                              |                                                                                                                                                         | 6-11         | S44      | 14/01/2020 - 30/11/2020                                                                            | 7.0                            | 11/2020                                          | -0.1 | 10.0             | --                                         | --             | --                                 | --        | 10                                   | --                                      |
| 7    | San Juan (Argentina)         | Rock glaciers, protalus ramparts, gelifluction / solifluction slopes, ground ice                                                                        | 7-1          | S45      | 12/05/2011 - 19/03/2015; 12/04/2015 - 23/11/2016                                                   | 25.0                           | 03/2015                                          | 4.4  | 25.0             | 0.03                                       | 0.26           | --                                 | --        | --                                   | --                                      |
|      |                              |                                                                                                                                                         | 7-2          | S46      | 12/05/2011 - 20/11/2013; 19/03/2014 - 18/03/2015; 05/12/2015 - 24/07/2017                          | 15.0                           | 07/2017                                          | -0.5 | 20.0             | -0.01                                      | 0.70           | 24/02/2013                         | 1.9       | 40                                   | 0.4                                     |
|      |                              |                                                                                                                                                         | 7-3          | S47      | 12/05/2011 - 27/12/2013; 19/03/2014 - 18/03/2015                                                   | 30.0                           | 03/2015                                          | 1.8  | 30.0             | -0.04                                      | 0.42           | --                                 | --        | --                                   | 0.0                                     |
|      |                              |                                                                                                                                                         | 7-4          | S48      | 07/07/2021 - 19/04/2022                                                                            | 10.0                           | 04/2022                                          | -0.1 | 20.0             | --                                         | --             | --                                 | --        | 20                                   | --                                      |
|      |                              |                                                                                                                                                         | 7-5          | S49      | 07/07/2021 - 19/04/2022                                                                            | 15.0                           | 04/2022                                          | -0.6 | 20.0             | --                                         | --             | --                                 | --        | 40                                   | --                                      |
|      |                              |                                                                                                                                                         | 7-6          | S50      | 07/07/2021 - 20/04/2022                                                                            | 7.5                            | 04/2022                                          | -0.6 | 20.0             | --                                         | --             | --                                 | --        | N/A -Cooling with depth / Isothermal | --                                      |
| 8    | Región Metropolitana (Chile) | Rock glaciers, gelifluction / solifluction slopes, ground ice                                                                                           | 8-1          | S51      | 05/12/2017 - 23/01/2021                                                                            | 20.0                           | 01/2021                                          | 2.2  | 20.3             | 0.04                                       | 0.69           | --                                 | --        | --                                   | -0.2                                    |
|      |                              |                                                                                                                                                         | 8-2          | S52      | 30/04/2017 - 10/12/2017; 02/04/2018 - 23/01/2021                                                   | --                             | 01/2021                                          | 1.0  | 17.7             | 0.05                                       | 0.68           | --                                 | --        | --                                   | 0.1                                     |
|      |                              |                                                                                                                                                         | 8-3          | S53      | 24/02/2019 - 23/01/2021                                                                            | 10.0                           | 12/2020                                          | 0.0  | 20.0             | --                                         | --             | --                                 | --        | 10                                   | 0.5                                     |

**Notes:**

1. Dampened temperature variations in winter (Y=Yes; N=No; UNK=Unknown).
2. Some values shown for depths not at 20m (i.e., maximum depth for strings < 20m, or adjusted depth to illustrate conditions within cryotic zones).

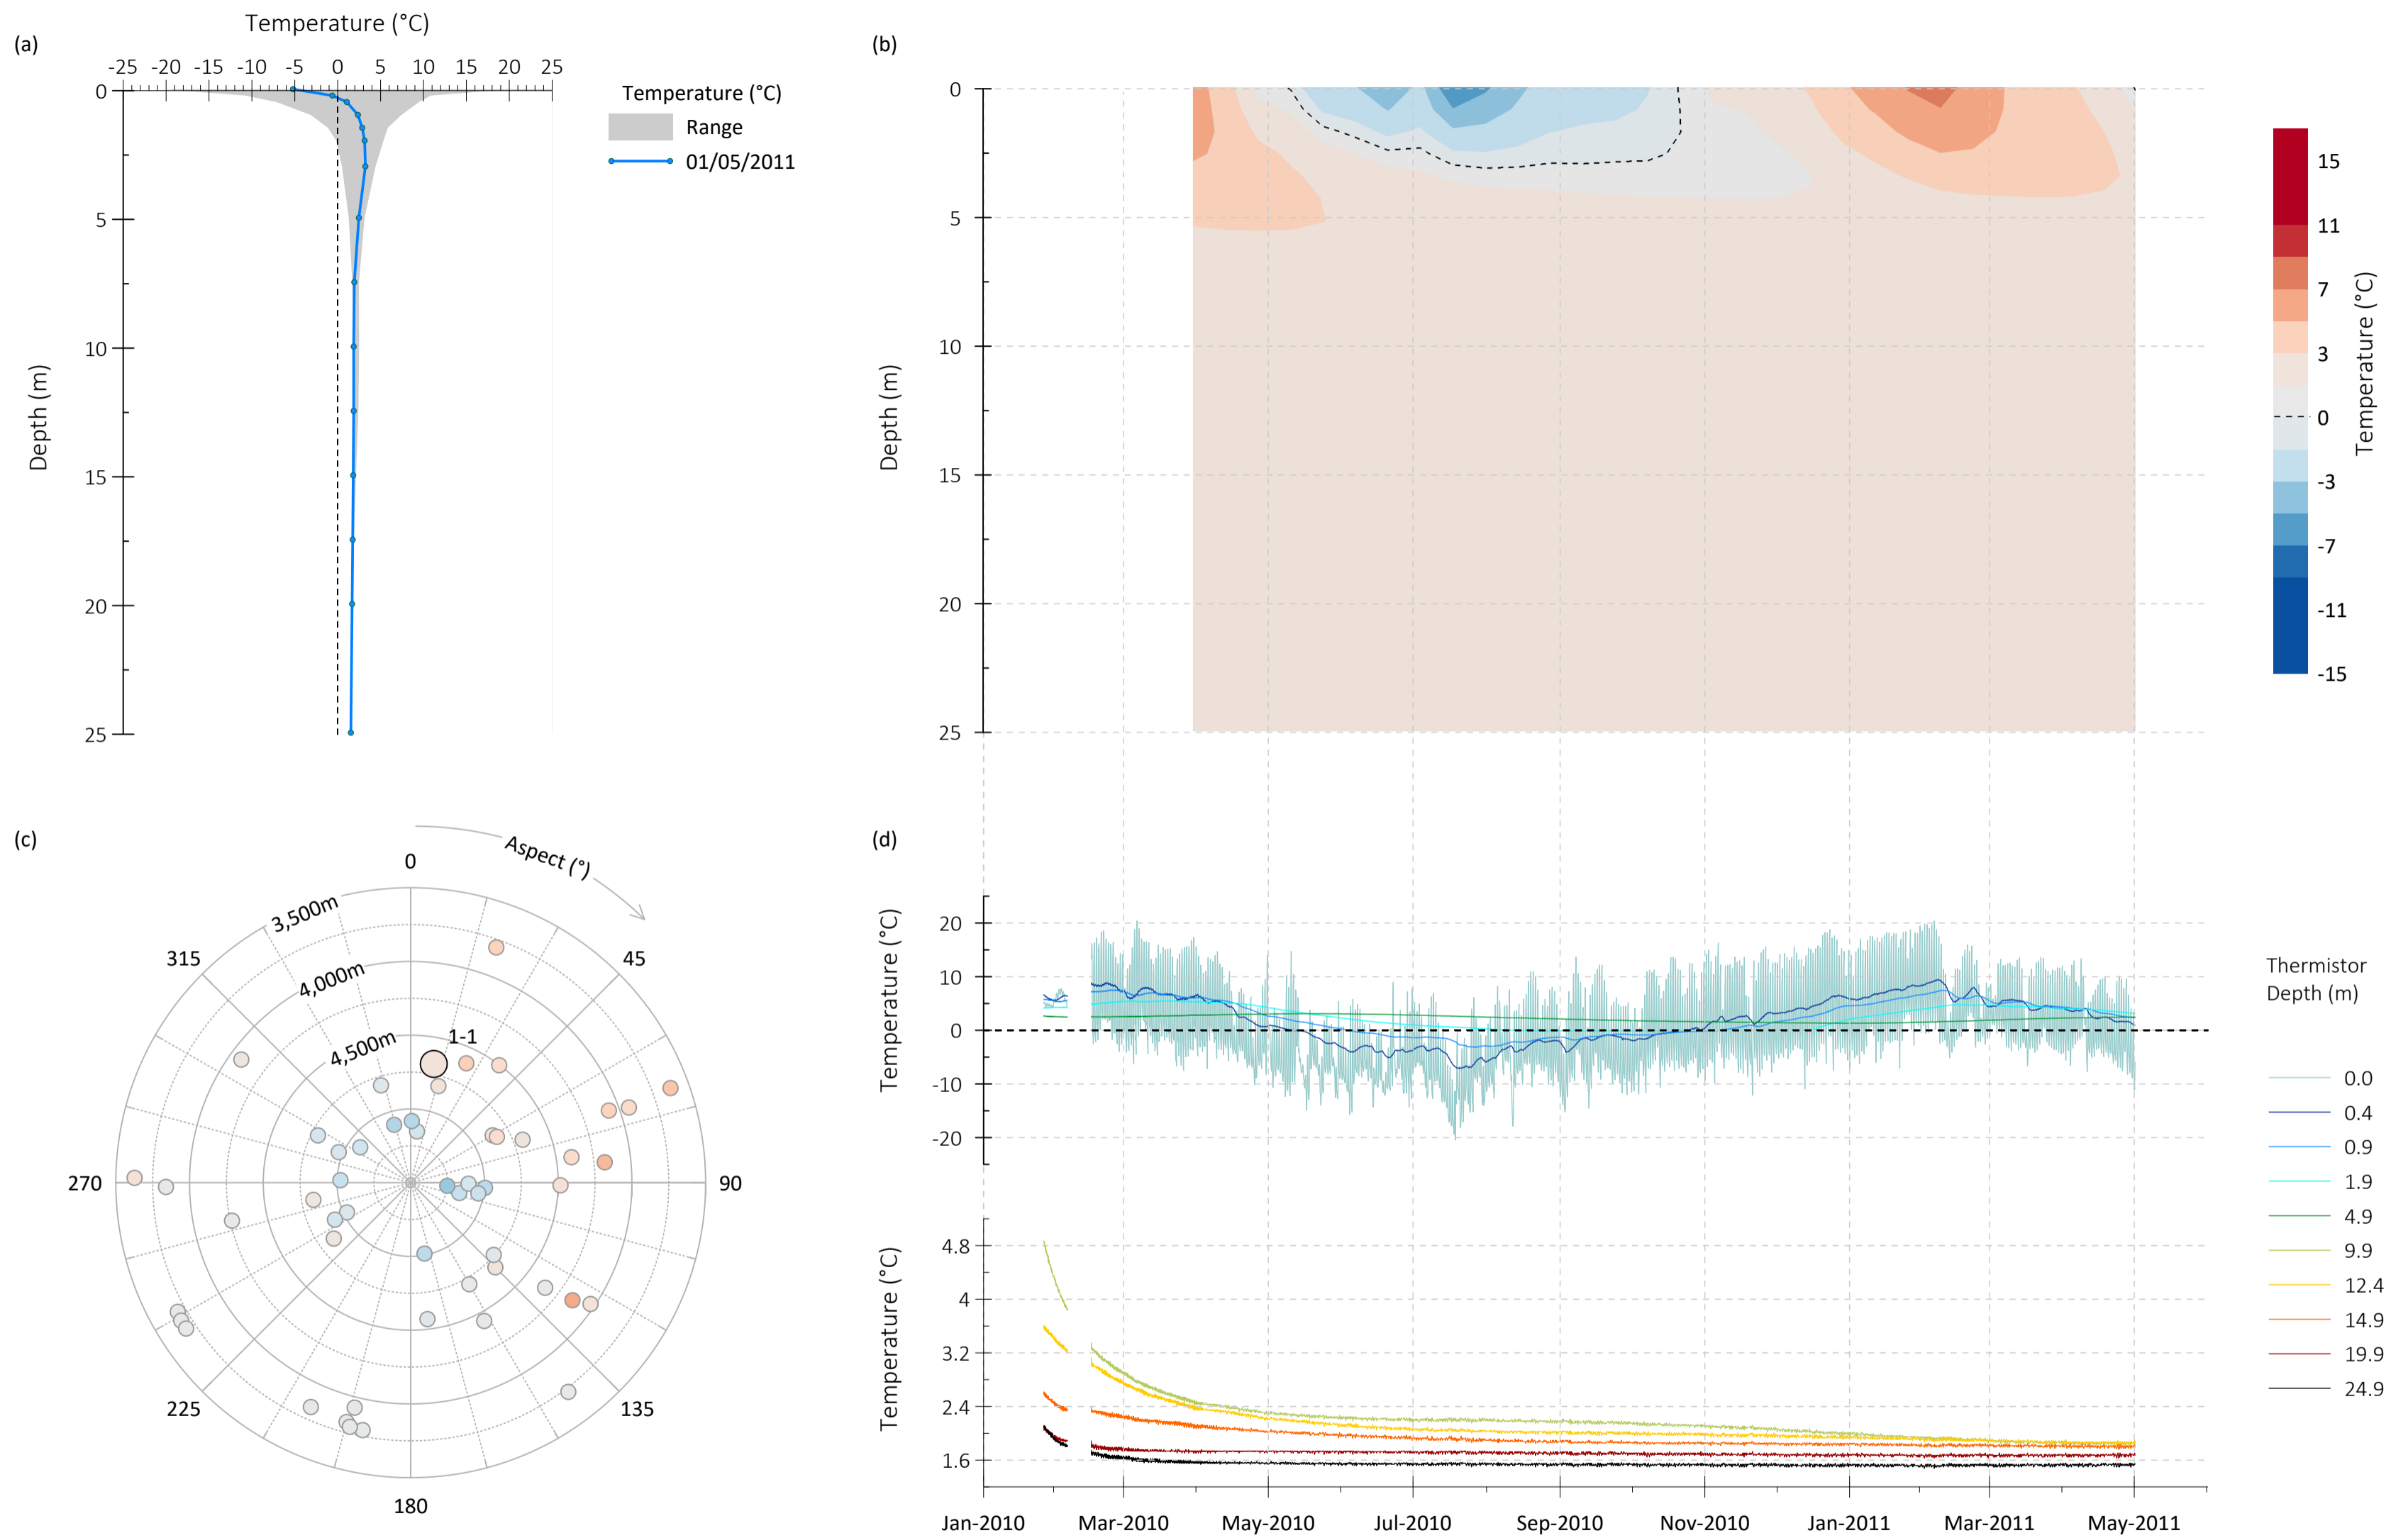

Figure S1: Ground thermal regime for Borehole 1-1 (El. = 4,680 m, Colluvium). Measurements collected approximately every 4 hours between 15/02/2010 and 01/05/2011. Early measurements affected by drilling. Borehole not actively monitored.

(a) Temperature depth profile. Range estimated using hourly raw data. Daily average of most recent available measurements shown in blue.

(b) Interpreted borehole temperature evolution with time. Contours estimated from hourly raw data.

(c) Aspect-elevation-temperature diagram of most recent monthly temperatures below DZAA at all boreholes; colour scale same as plot (b). Borehole 1-1 (T = 1.69 °C, depth = 19.9 m) is indicated by enlarged symbol.

(d) Raw temperature time-series for selected depths at Borehole 1-1. Full dataset includes measurements from 15 sensors.

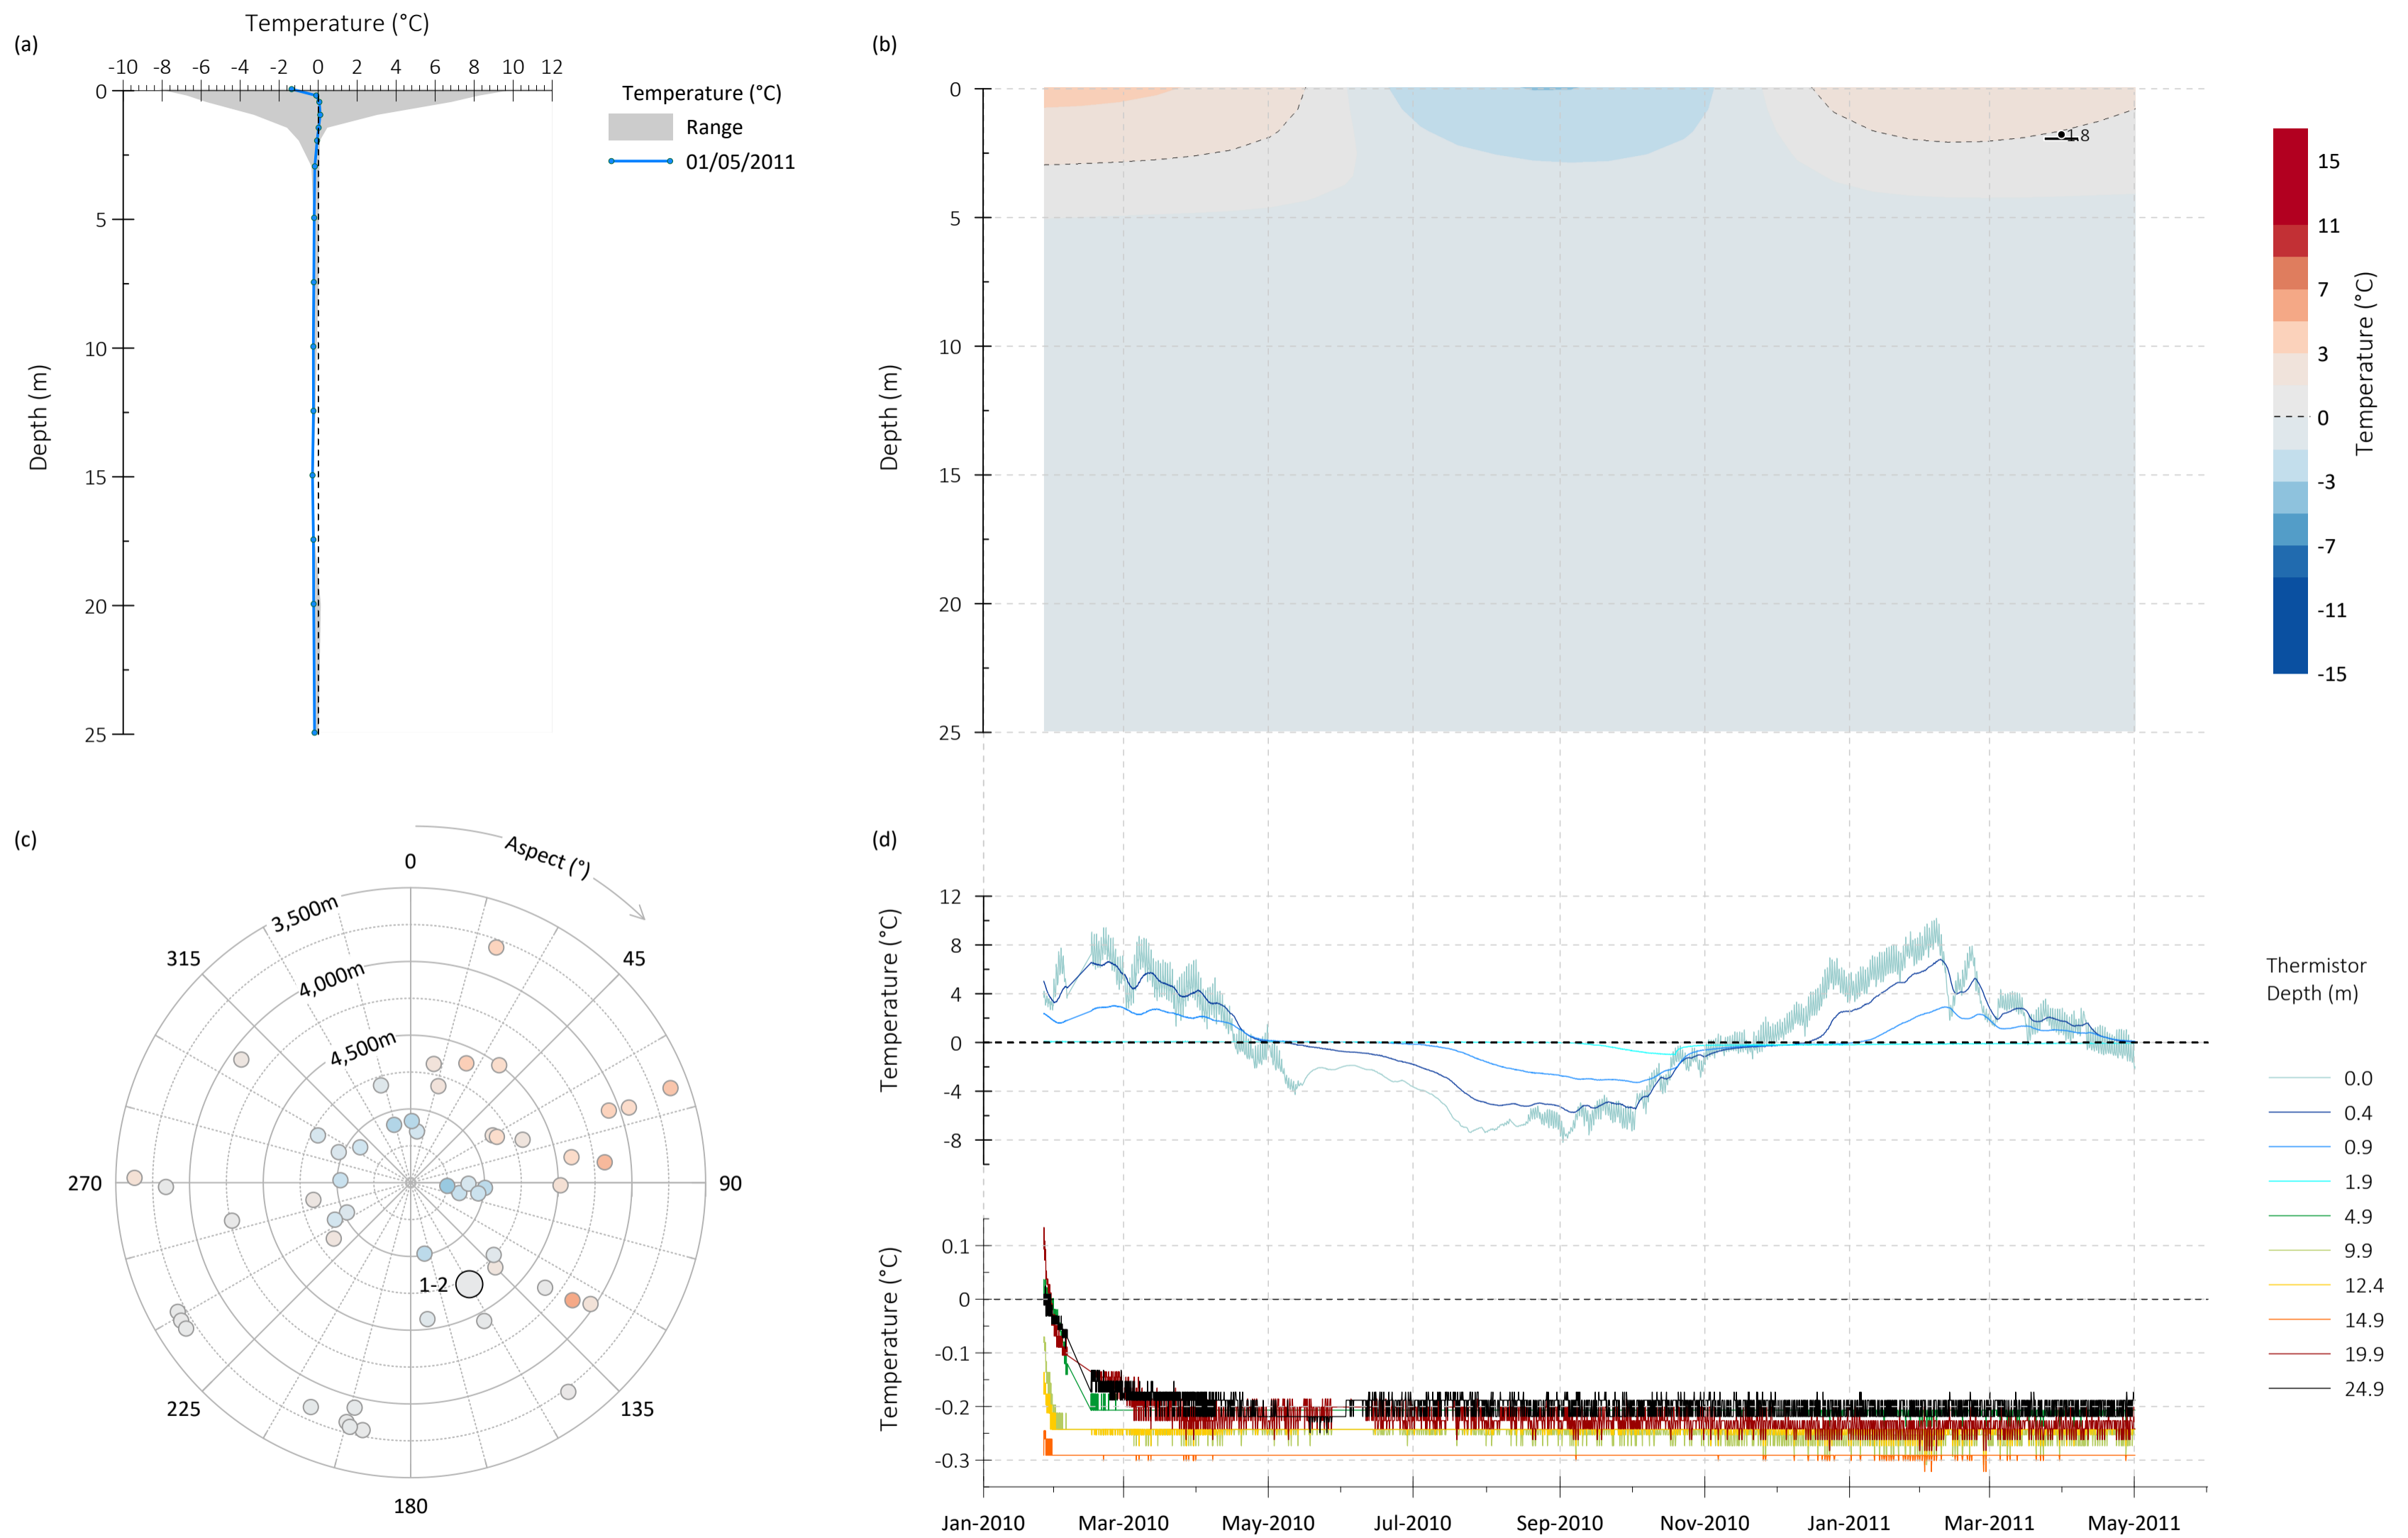

Figure S2: Ground thermal regime for Borehole 1-2 (El. = 4,705 m, Bedrock (weathered)). Measurements collected approximately every 4 hours between 26/01/2010 and 01/05/2011. Early measurements affected by drilling. Borehole not actively monitored.

- (a) Temperature depth profile. Range estimated using hourly raw data. Daily average of most recent available measurements shown in blue.  
 (b) Interpreted borehole temperature evolution with time. Contours estimated from hourly raw data. Seasonal thaw indicated by black dot; horizontal lines indicate the depth of thermistors used for interpolation.  
 (c) Aspect-elevation-temperature diagram of most recent monthly temperatures below DZAA at all boreholes; colour scale same as plot (b). Borehole 1-2 ( $T = -0.24$  °C, depth = 19.9 m) is indicated by enlarged symbol.  
 (d) Raw temperature time-series for selected depths at Borehole 1-2. Full dataset includes measurements from 15 sensors.

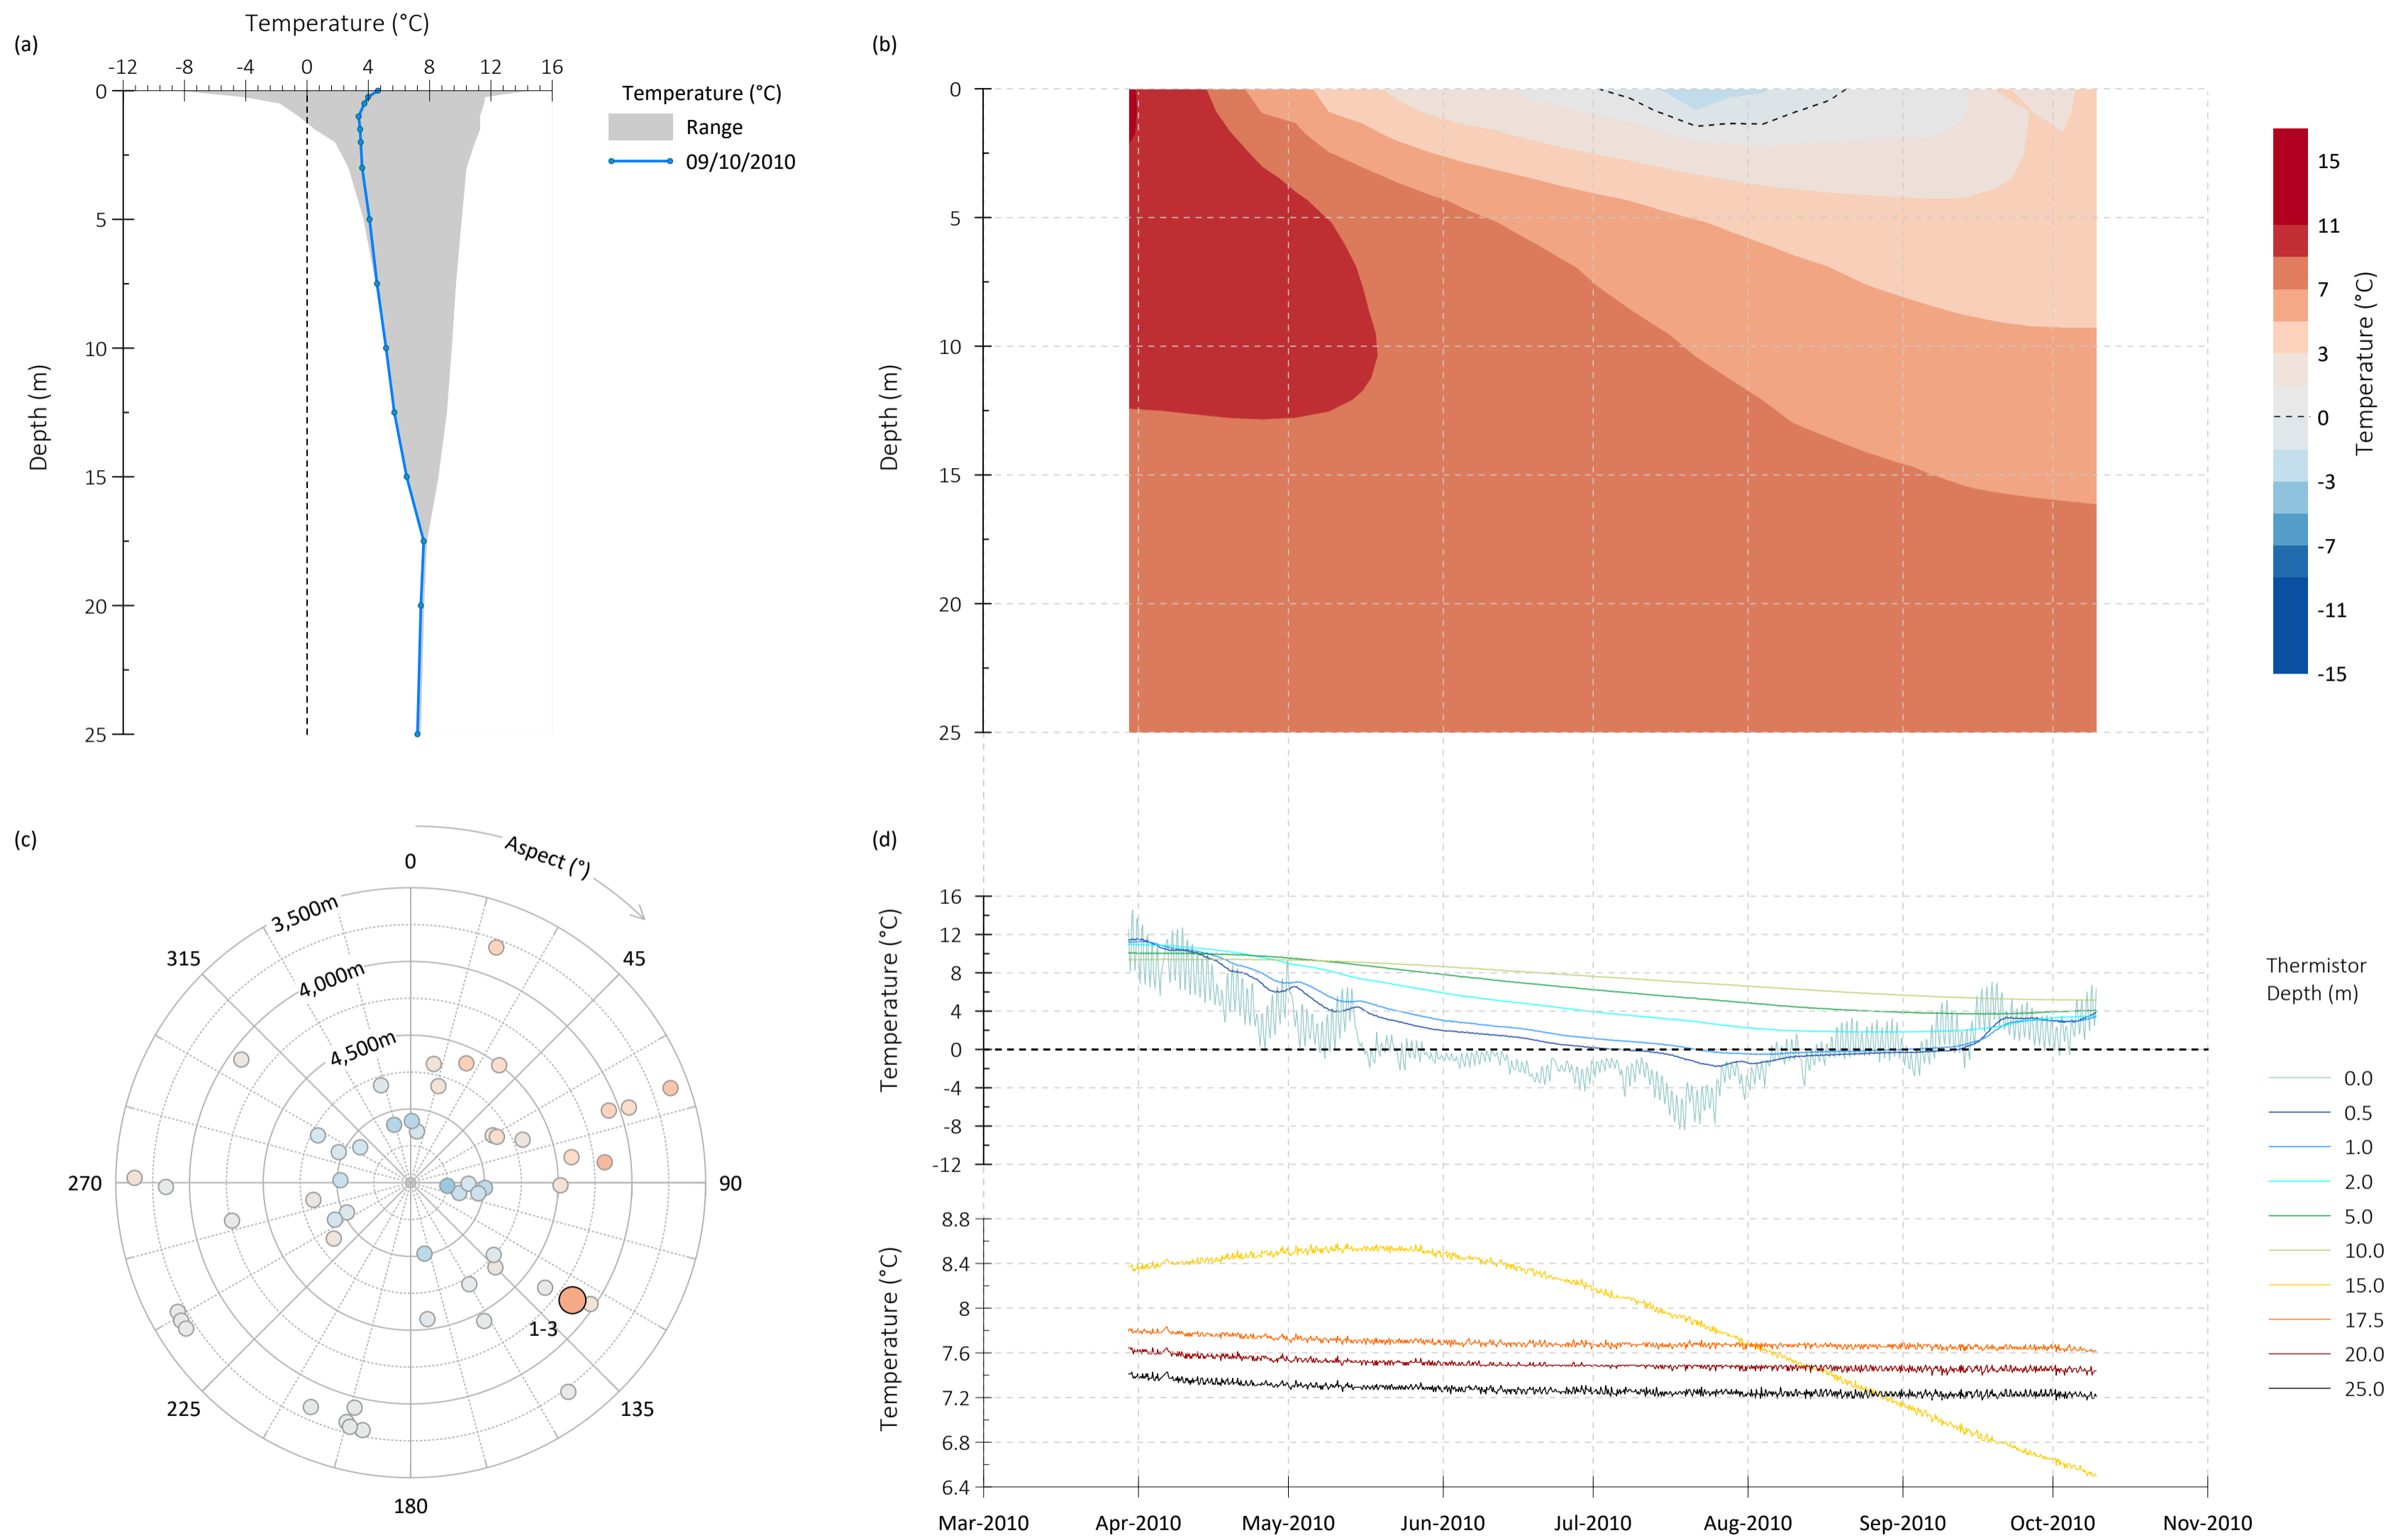

Figure S3: Ground thermal regime for Borehole 1-3 (El. = 4,144 m, Colluvium). Measurements collected approximately every 4 hours between 30/03/2010 and 09/10/2010. Early measurements affected by drilling. Borehole not actively monitored.

(a) Temperature depth profile. Range estimated using hourly raw data. Daily average of most recent available measurements shown in blue.

(b) Interpreted borehole temperature evolution with time. Contours estimated from hourly raw data.

(c) Aspect-elevation-temperature diagram of most recent monthly temperatures below DZAA at all boreholes; colour scale same as plot (b). Borehole 1-3 (T = 7.44 °C, depth = 20 m) is indicated by enlarged symbol.

(d) Raw temperature time-series for selected depths at Borehole 1-3. Full dataset includes measurements from 15 sensors.

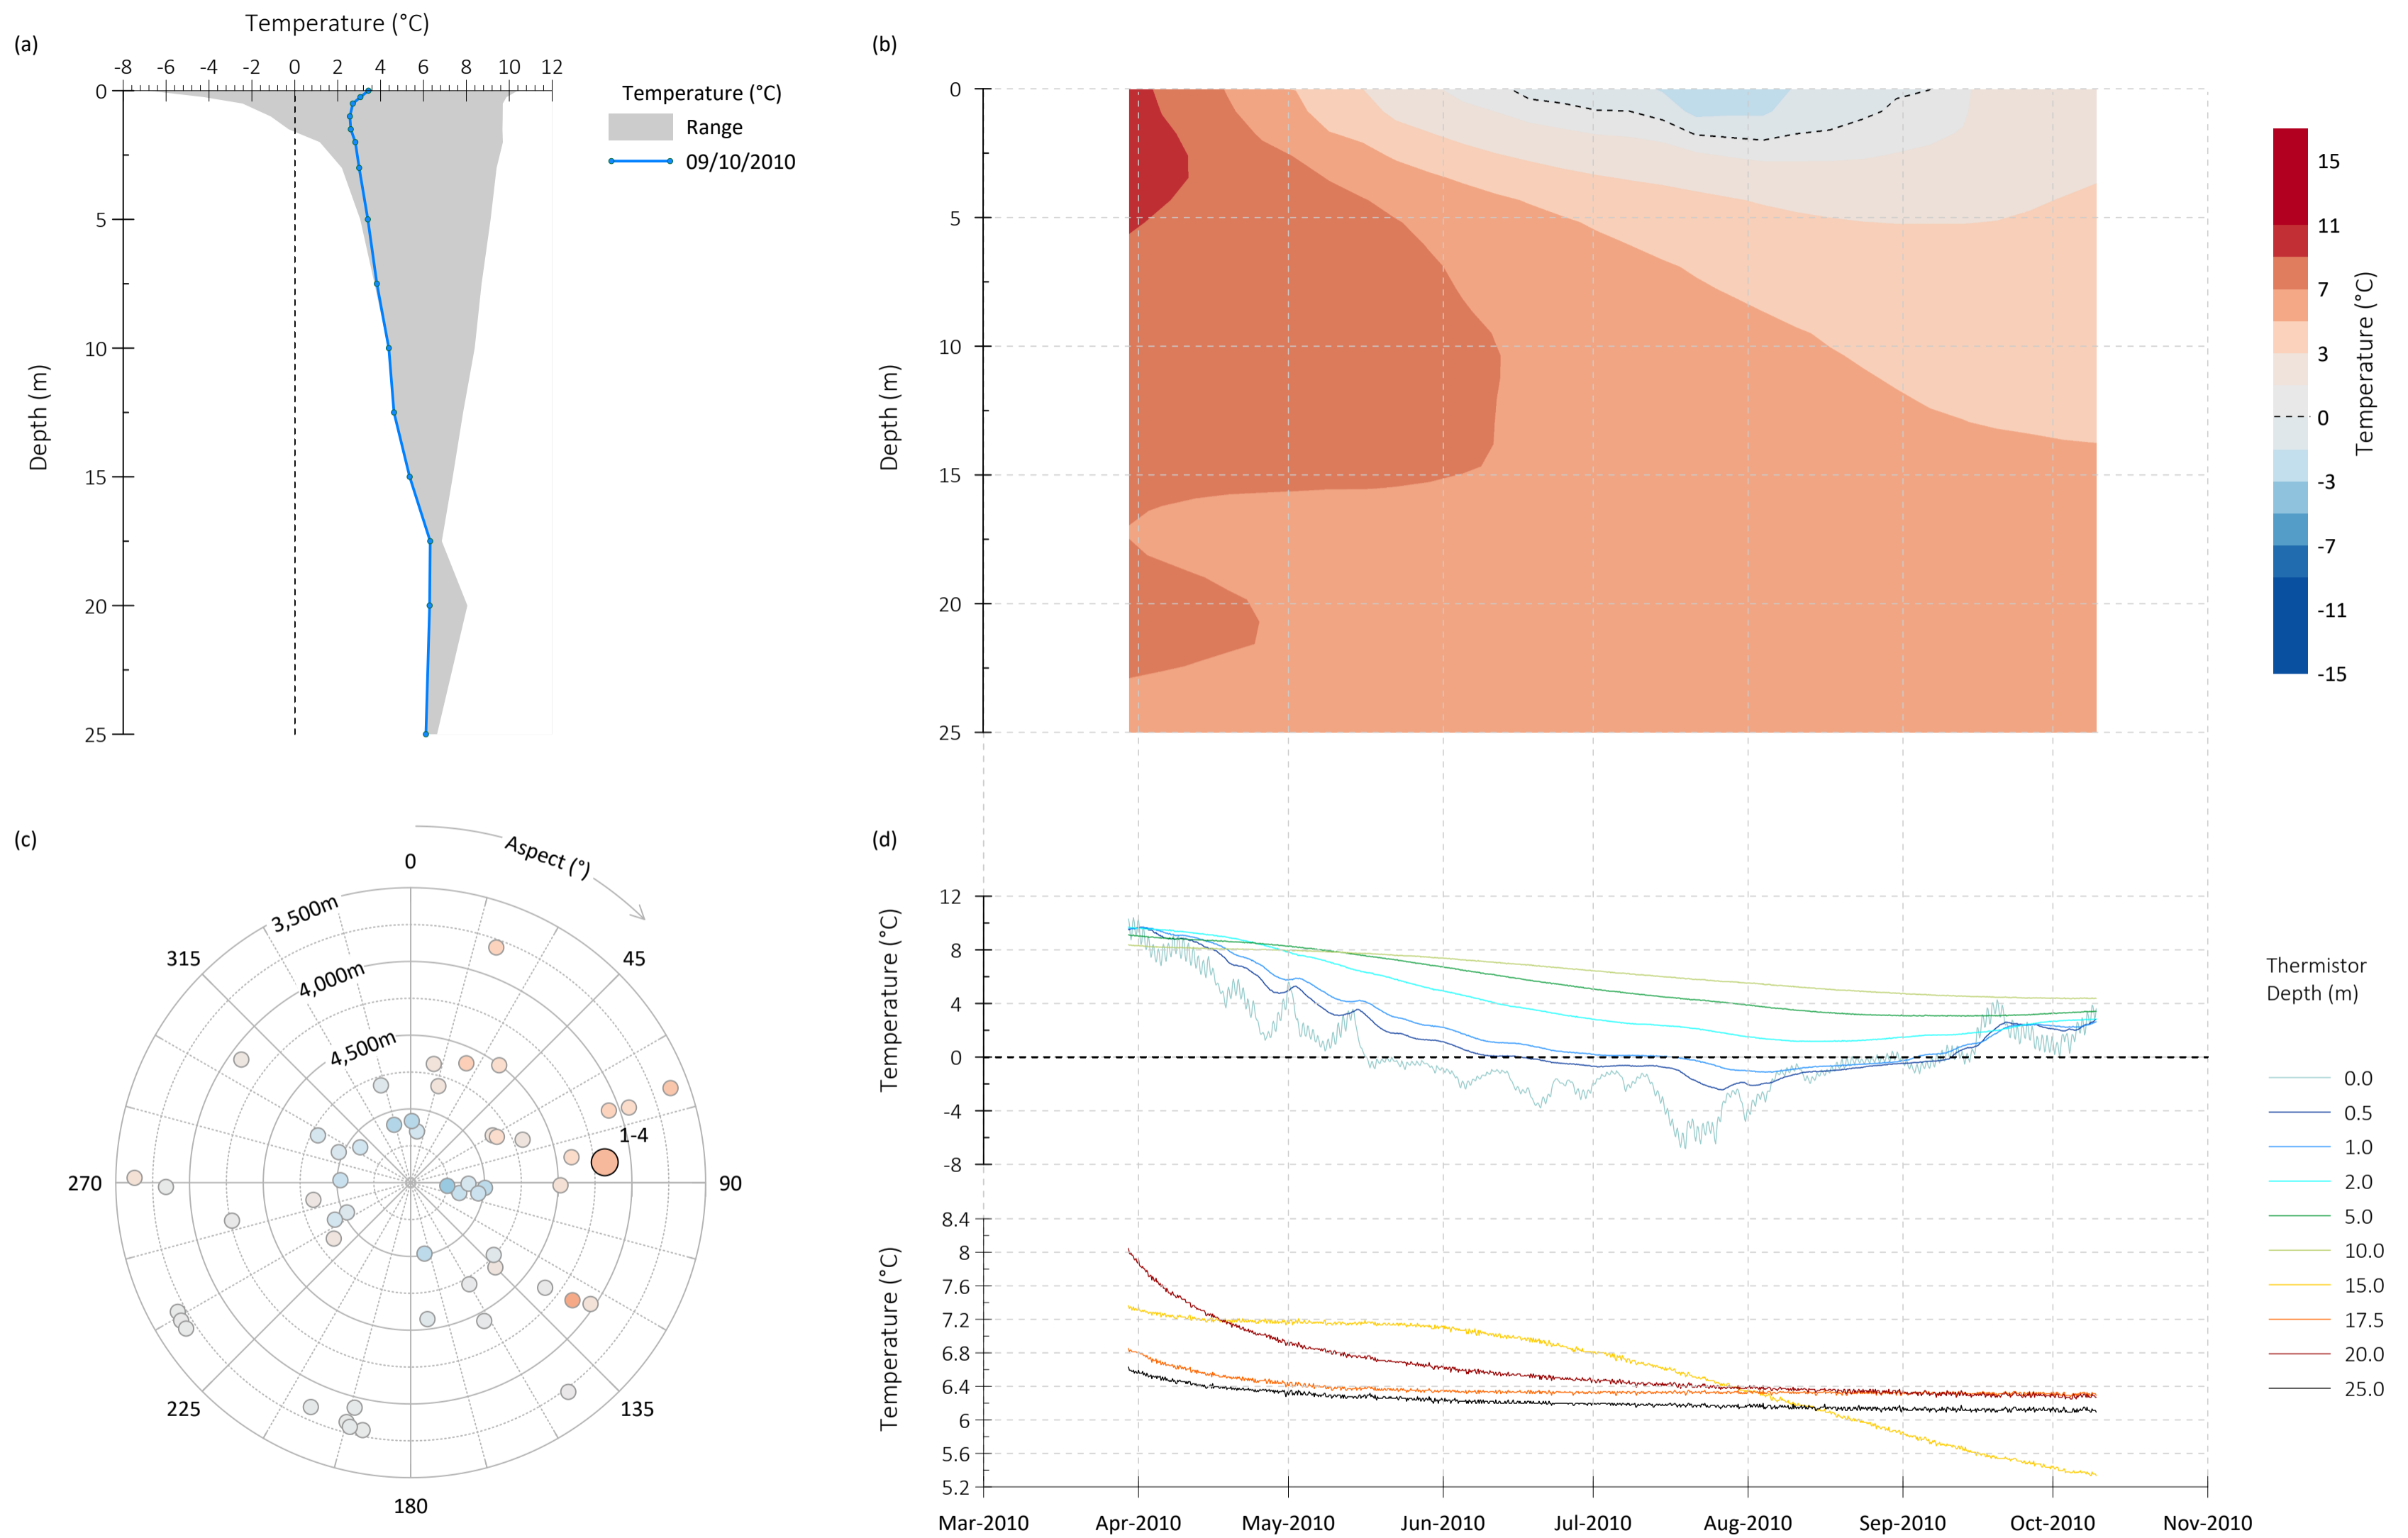

Figure S4: Ground thermal regime for Borehole 1-4 (El. = 4,177 m, Old landslide deposit). Measurements collected approximately every 4 hours between 30/03/2010 and 09/10/2010. Early measurements affected by drilling. Borehole not actively monitored.

(a) Temperature depth profile. Range estimated using hourly raw data. Daily average of most recent available measurements shown in blue.

(b) Interpreted borehole temperature evolution with time. Contours estimated from hourly raw data.

(c) Aspect-elevation-temperature diagram of most recent monthly temperatures below DZAA at all boreholes; colour scale same as plot (b). Borehole 1-4 ( $T = 6.28\text{ }^{\circ}\text{C}$ , depth=20 m) is indicated by enlarged symbol.

(d) Raw temperature time-series for selected depths at Borehole 1-4. Full dataset includes measurements from 15 sensors.



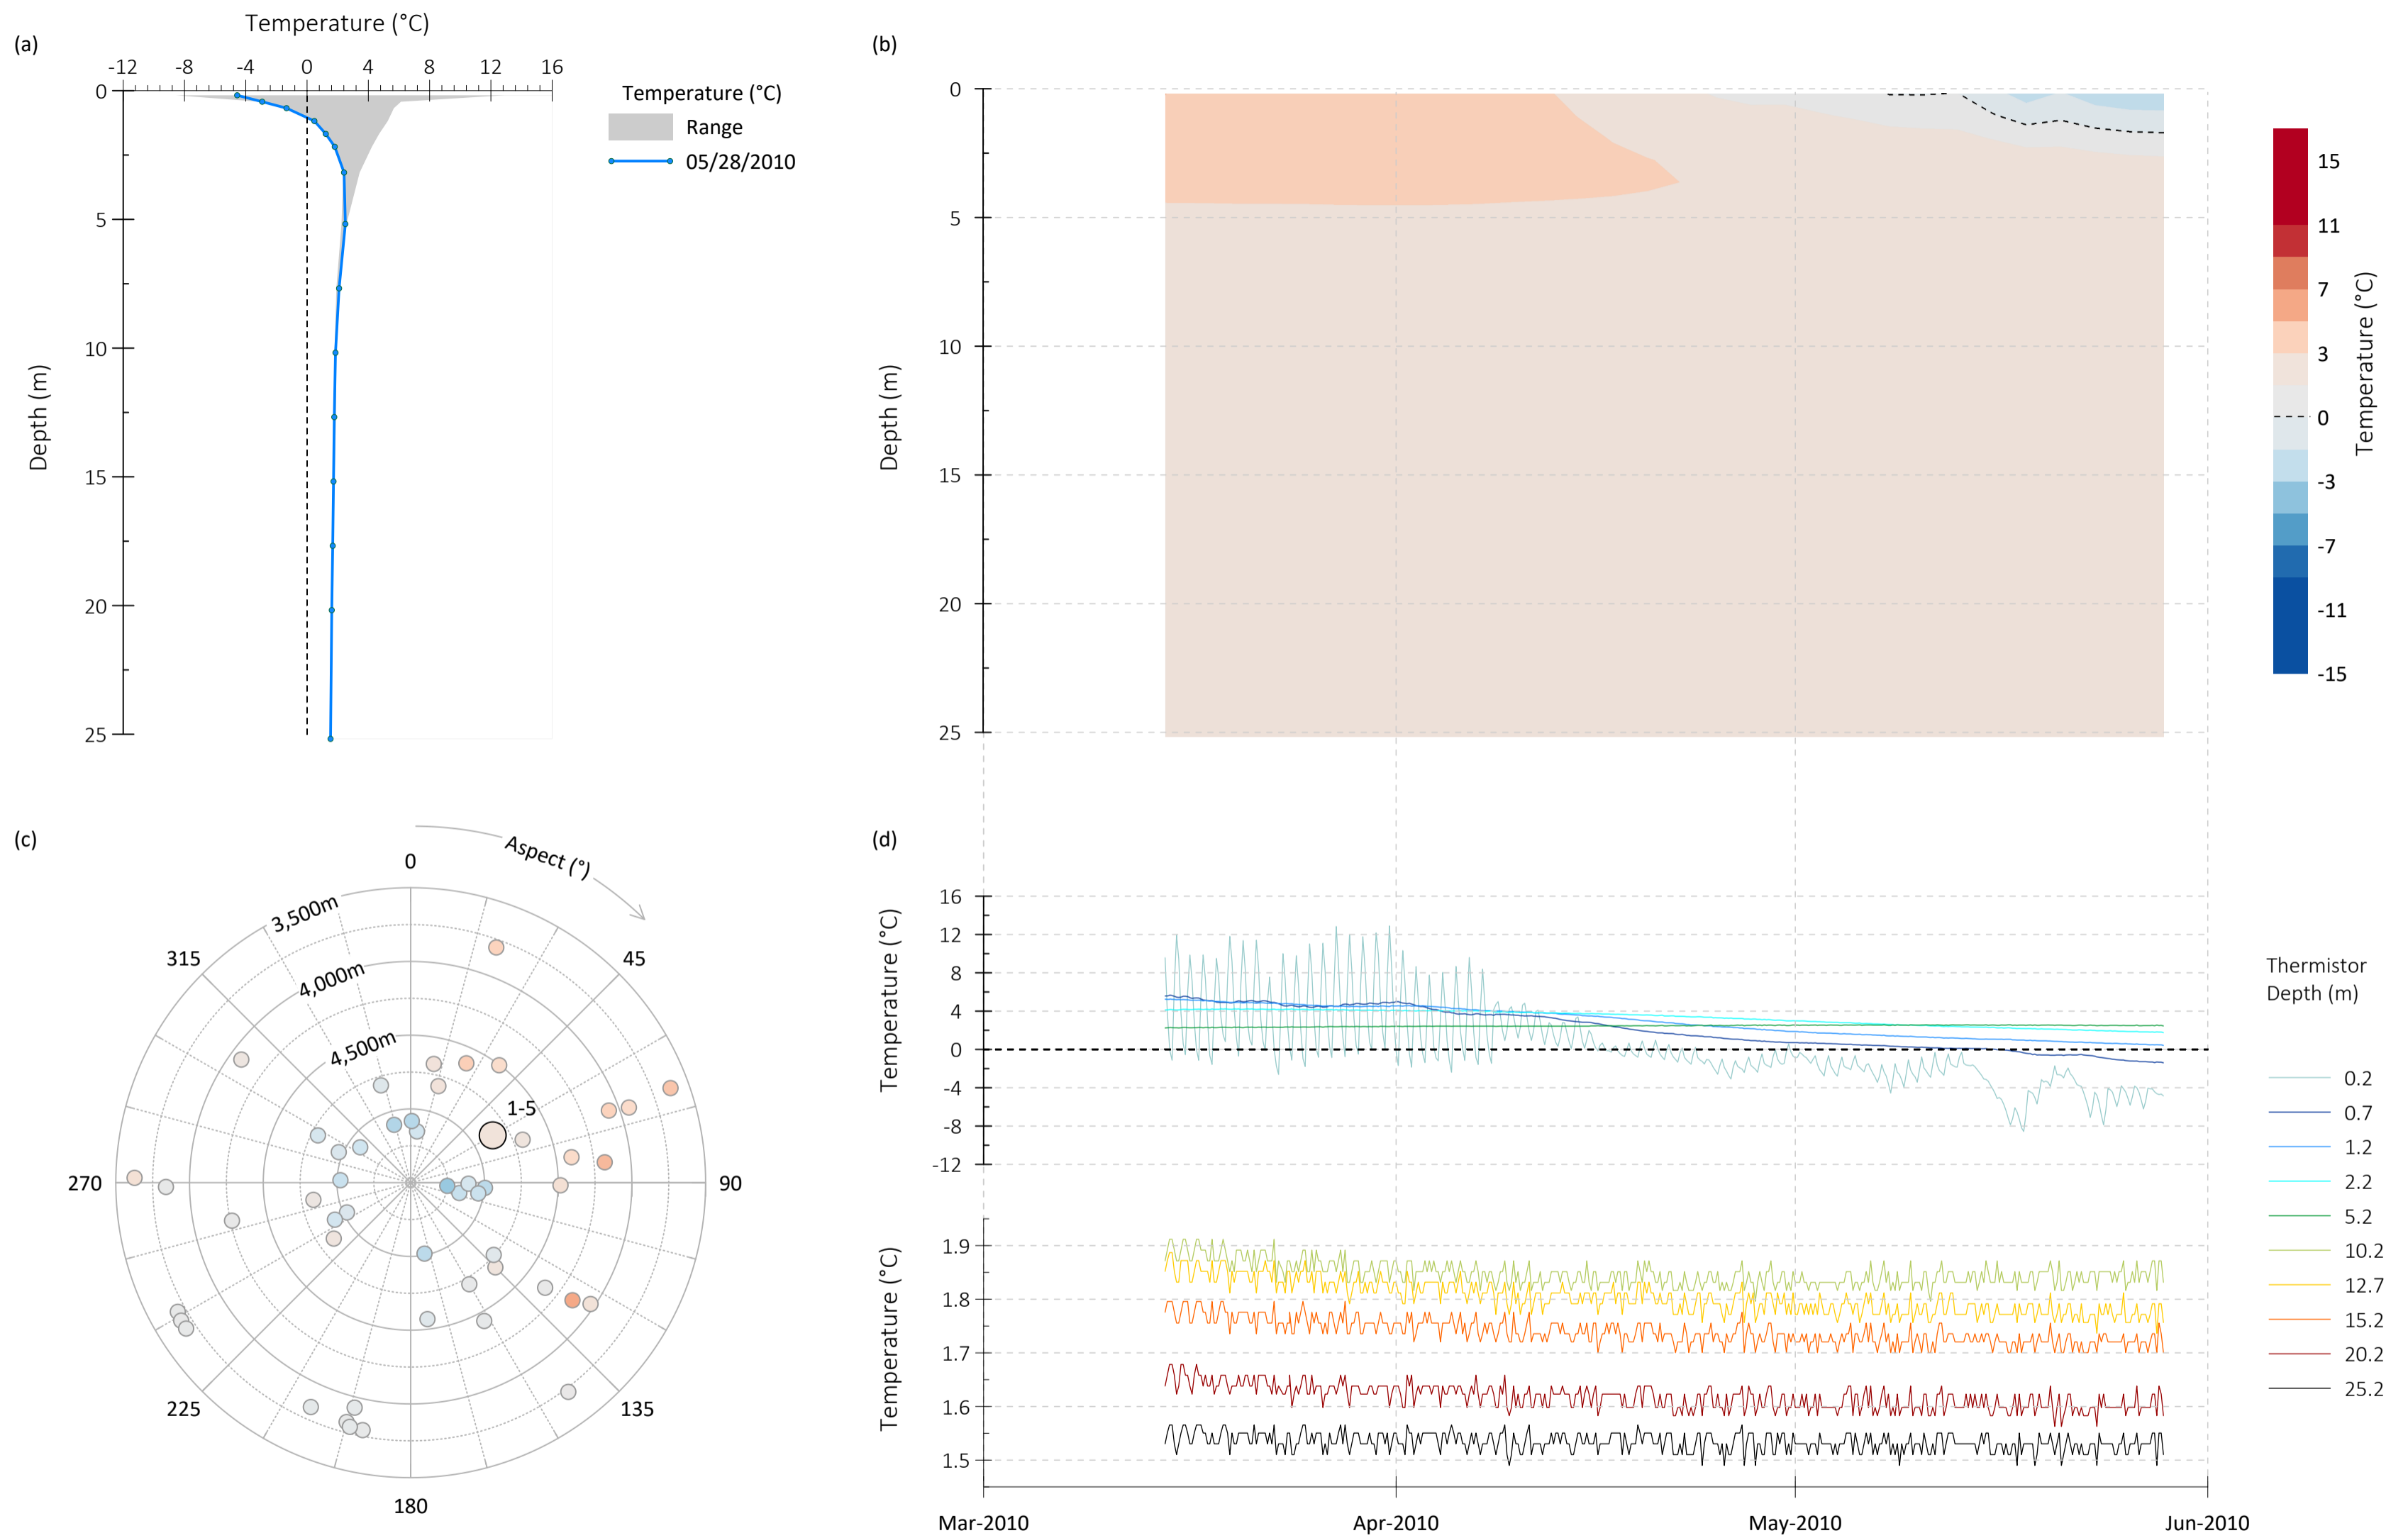

Figure S5: Ground thermal regime for Borehole 1-5 (El. = 4,858 m, Bedrock (highly weathered)). Measurements collected approximately every 4 hours between 14/03/2010 and 28/05/2010. Early measurements affected by drilling. Borehole not actively monitored.

(a) Temperature depth profile. Range estimated using hourly raw data. Daily average of most recent available measurements shown in blue.

(b) Interpreted borehole temperature evolution with time. Contours estimated from hourly raw data.

(c) Aspect-elevation-temperature diagram of most recent monthly temperatures below DZAA at all boreholes; colour scale same as plot (b). Borehole 1-5 (T = 1.6 °C, depth = 20.2 m) is indicated by enlarged symbol.

(d) Raw temperature time-series for selected depths at Borehole 1-5. Full dataset includes measurements from 15 sensors.

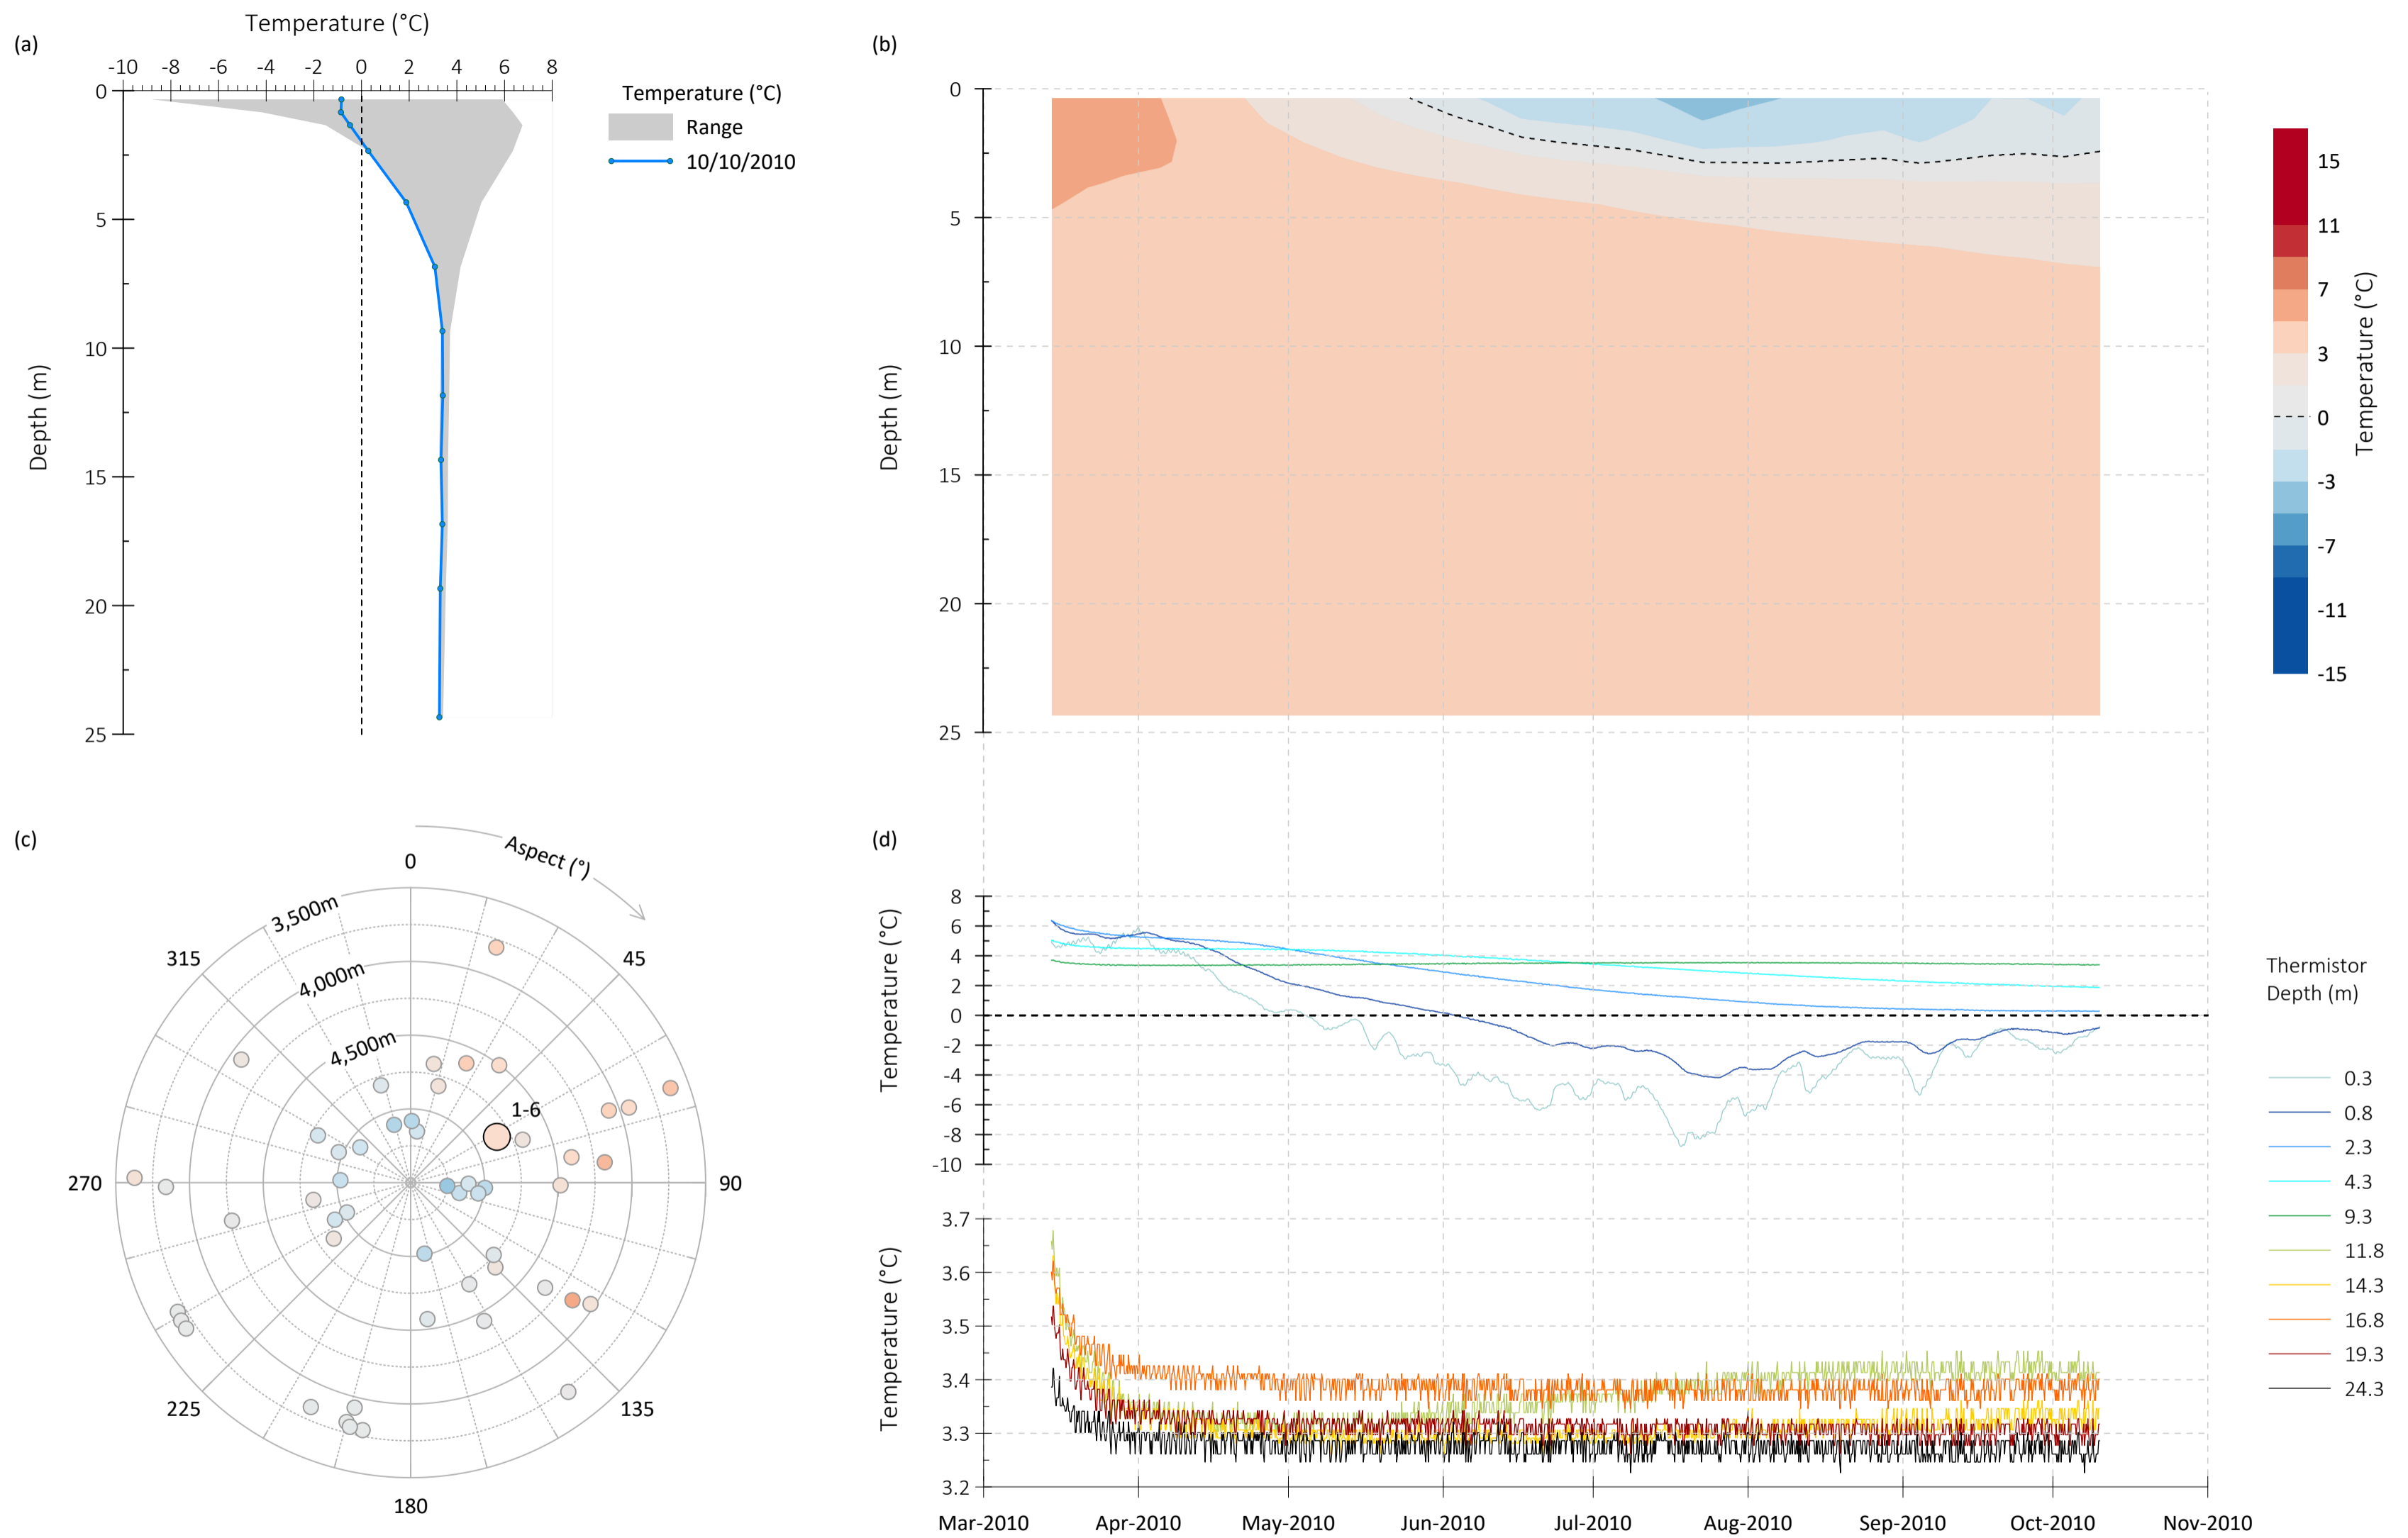

Figure S6: Ground thermal regime for Borehole 1-6 (El. = 4,838 m, Bedrock (highly weathered: sand)). Measurements collected approximately every 4 hours between 14/03/2010 and 10/10/2010. Early measurements affected by drilling. Borehole not actively monitored.

(a) Temperature depth profile. Range estimated using hourly raw data. Daily average of most recent available measurements shown in blue.

(b) Interpreted borehole temperature evolution with time. Contours estimated from hourly raw data.

(c) Aspect-elevation-temperature diagram of most recent monthly temperatures below DZAA at all boreholes; colour scale same as plot (b). Borehole 1-6 ( $T = 3.3$  °C, depth=19.3 m) is indicated by enlarged symbol.

(d) Raw temperature time-series for selected depths at Borehole 1-6. Full dataset includes measurements from 12 sensors.

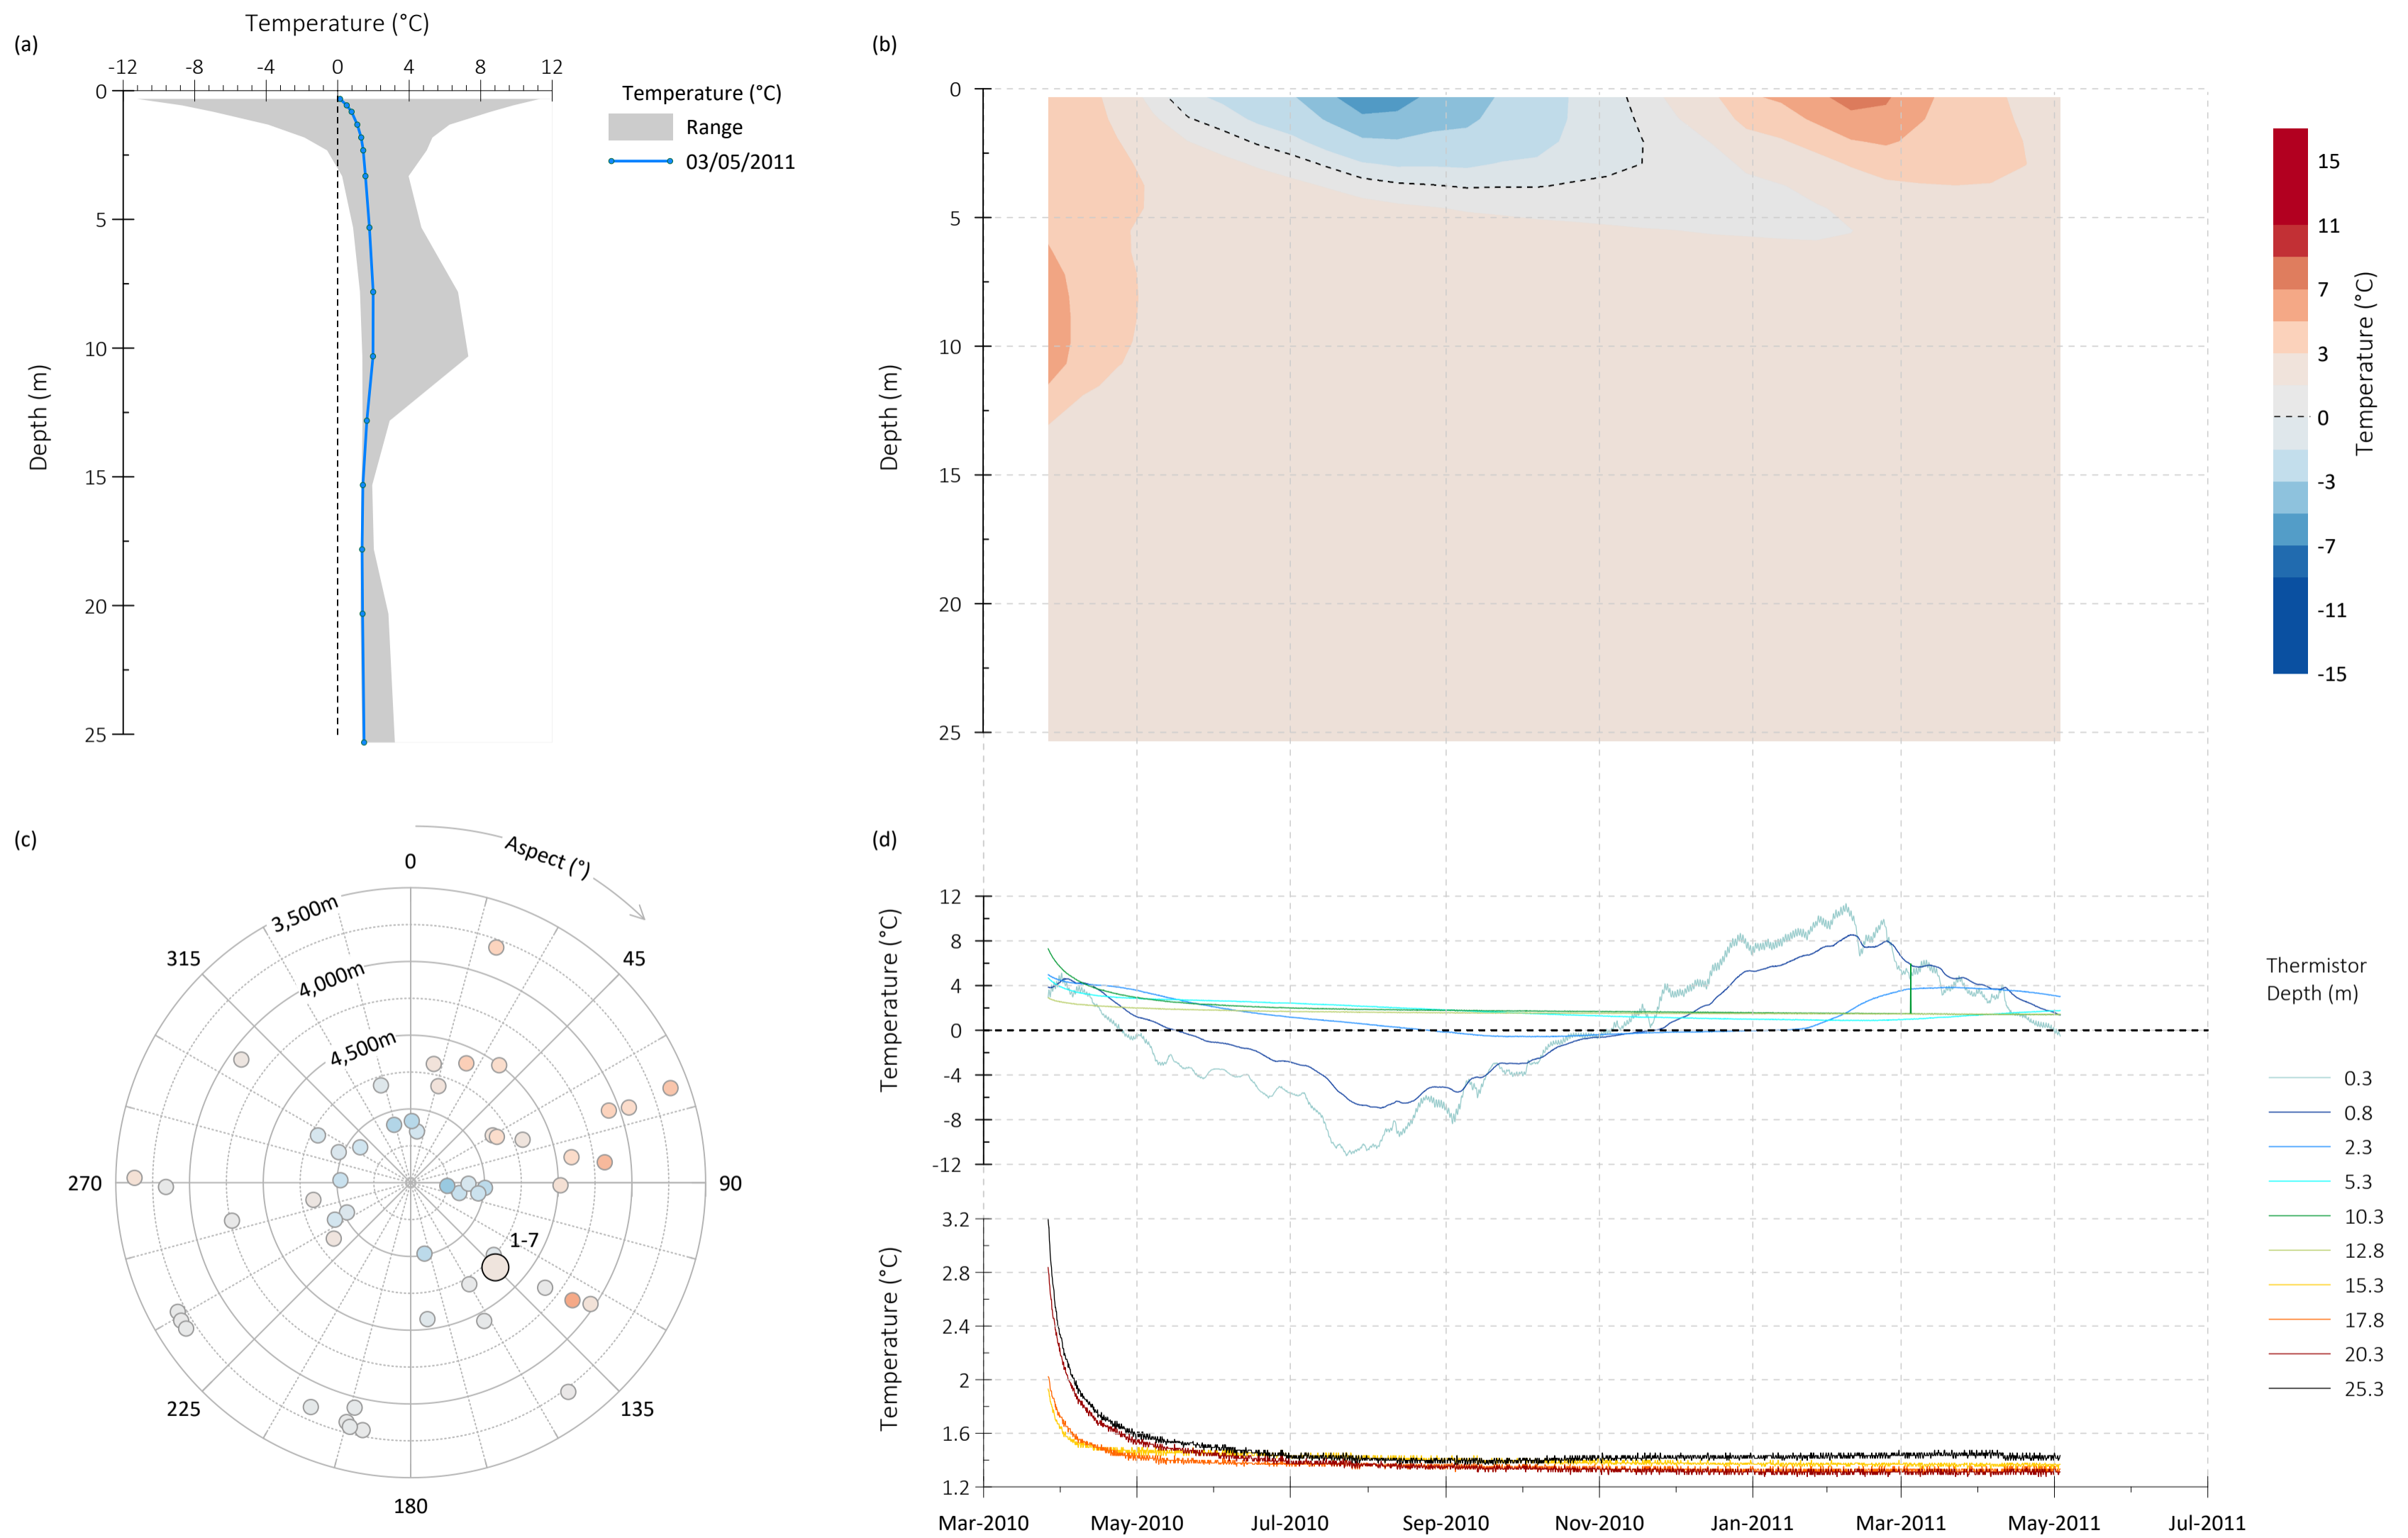

Figure S7: Ground thermal regime for Borehole 1-7 (El. = 4,688 m, Colluvium). Measurements collected approximately every 4 hours between 26/03/2010 and 03/05/2011. Early measurements affected by drilling. Borehole not actively monitored.

(a) Temperature depth profile. Range estimated using hourly raw data. Daily average of most recent available measurements shown in blue.

(b) Interpreted borehole temperature evolution with time. Contours estimated from hourly raw data.

(c) Aspect-elevation-temperature diagram of most recent monthly temperatures below DZAA at all boreholes; colour scale same as plot (b). Borehole 1-7 ( $T = 1.31\text{ }^{\circ}\text{C}$ , depth=20.3 m) is indicated by enlarged symbol.

(d) Raw temperature time-series for selected depths at Borehole 1-7. Full dataset includes measurements from 15 sensors.

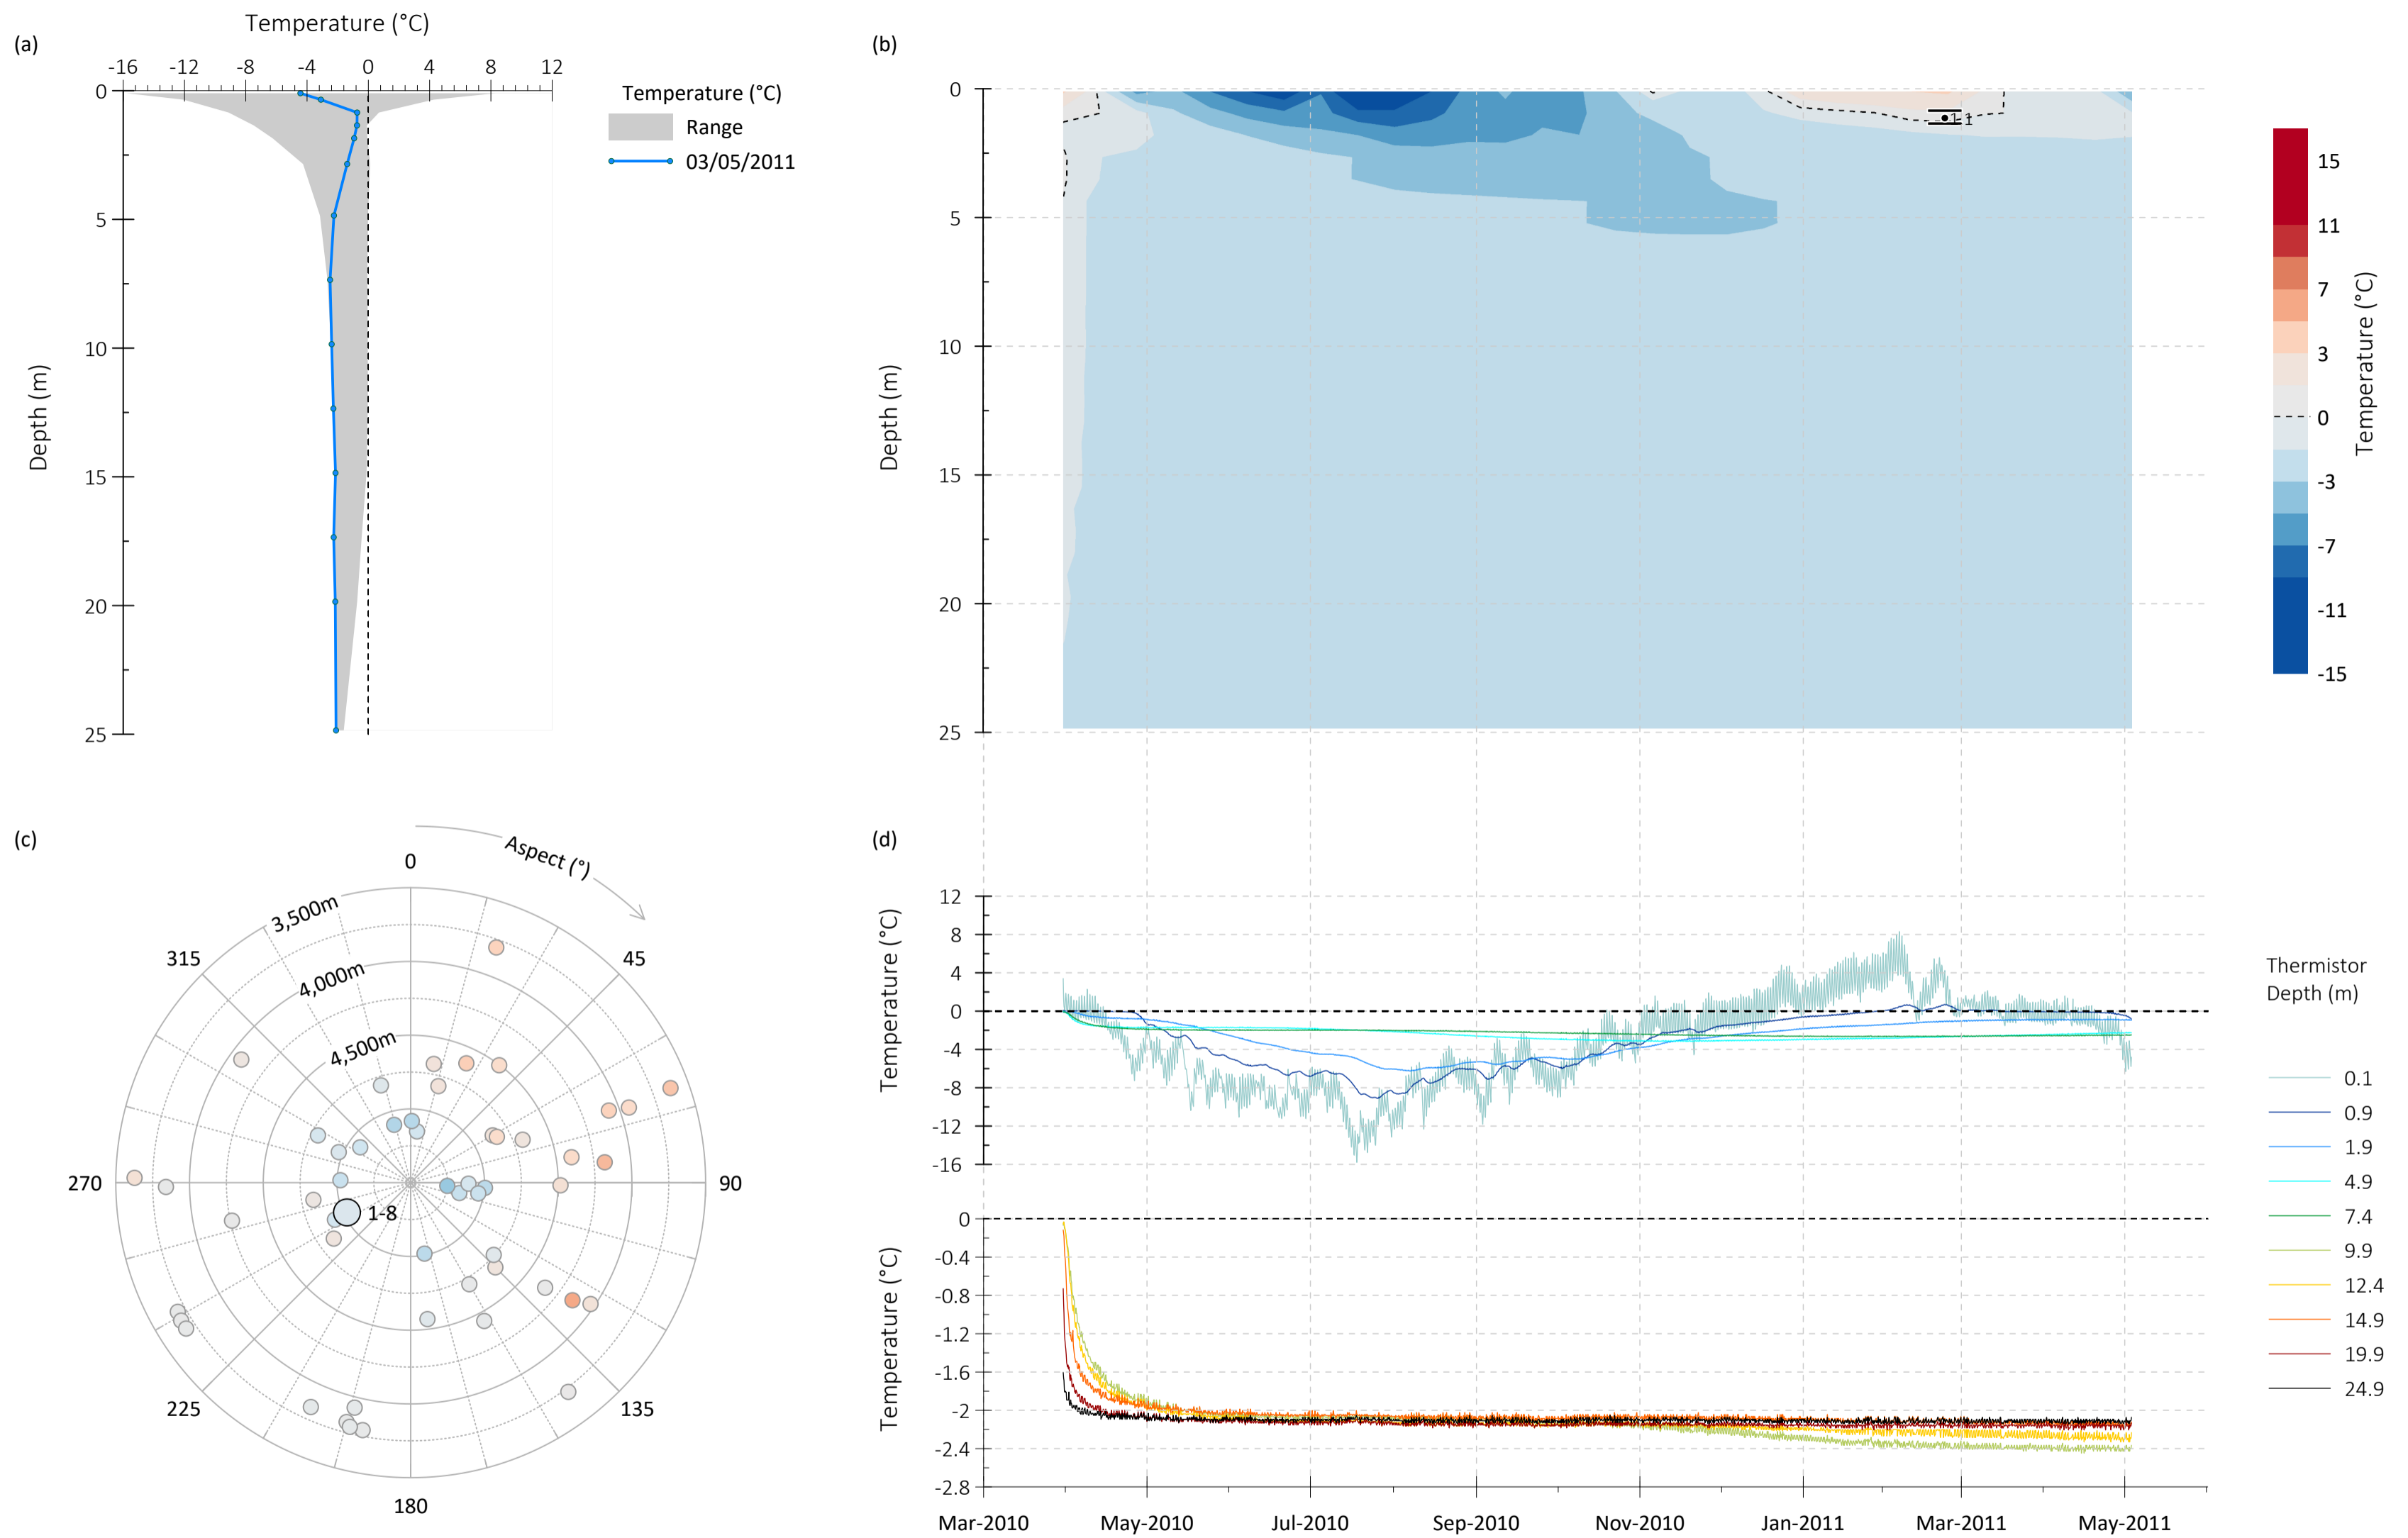

Figure S8: Ground thermal regime for Borehole 1-8 (El. = 5,023 m, Bedrock). Measurements collected approximately every 4 hours between 30/03/2010 and 03/05/2011. Early measurements affected by drilling. Borehole not actively monitored.

- (a) Temperature depth profile. Range estimated using hourly raw data. Daily average of most recent available measurements shown in blue.
- (b) Interpreted borehole temperature evolution with time. Contours estimated from hourly raw data. Seasonal thaw indicated by black dot; horizontal lines indicate the depth of thermistors used for interpolation.
- (c) Aspect-elevation-temperature diagram of most recent monthly temperatures below DZAA at all boreholes; colour scale same as plot (b). Borehole 1-8 ( $T = -2.16$  °C, depth = 19.9 m) is indicated by enlarged symbol.
- (d) Raw temperature time-series for selected depths at Borehole 1-8. Full dataset includes measurements from 14 sensors.

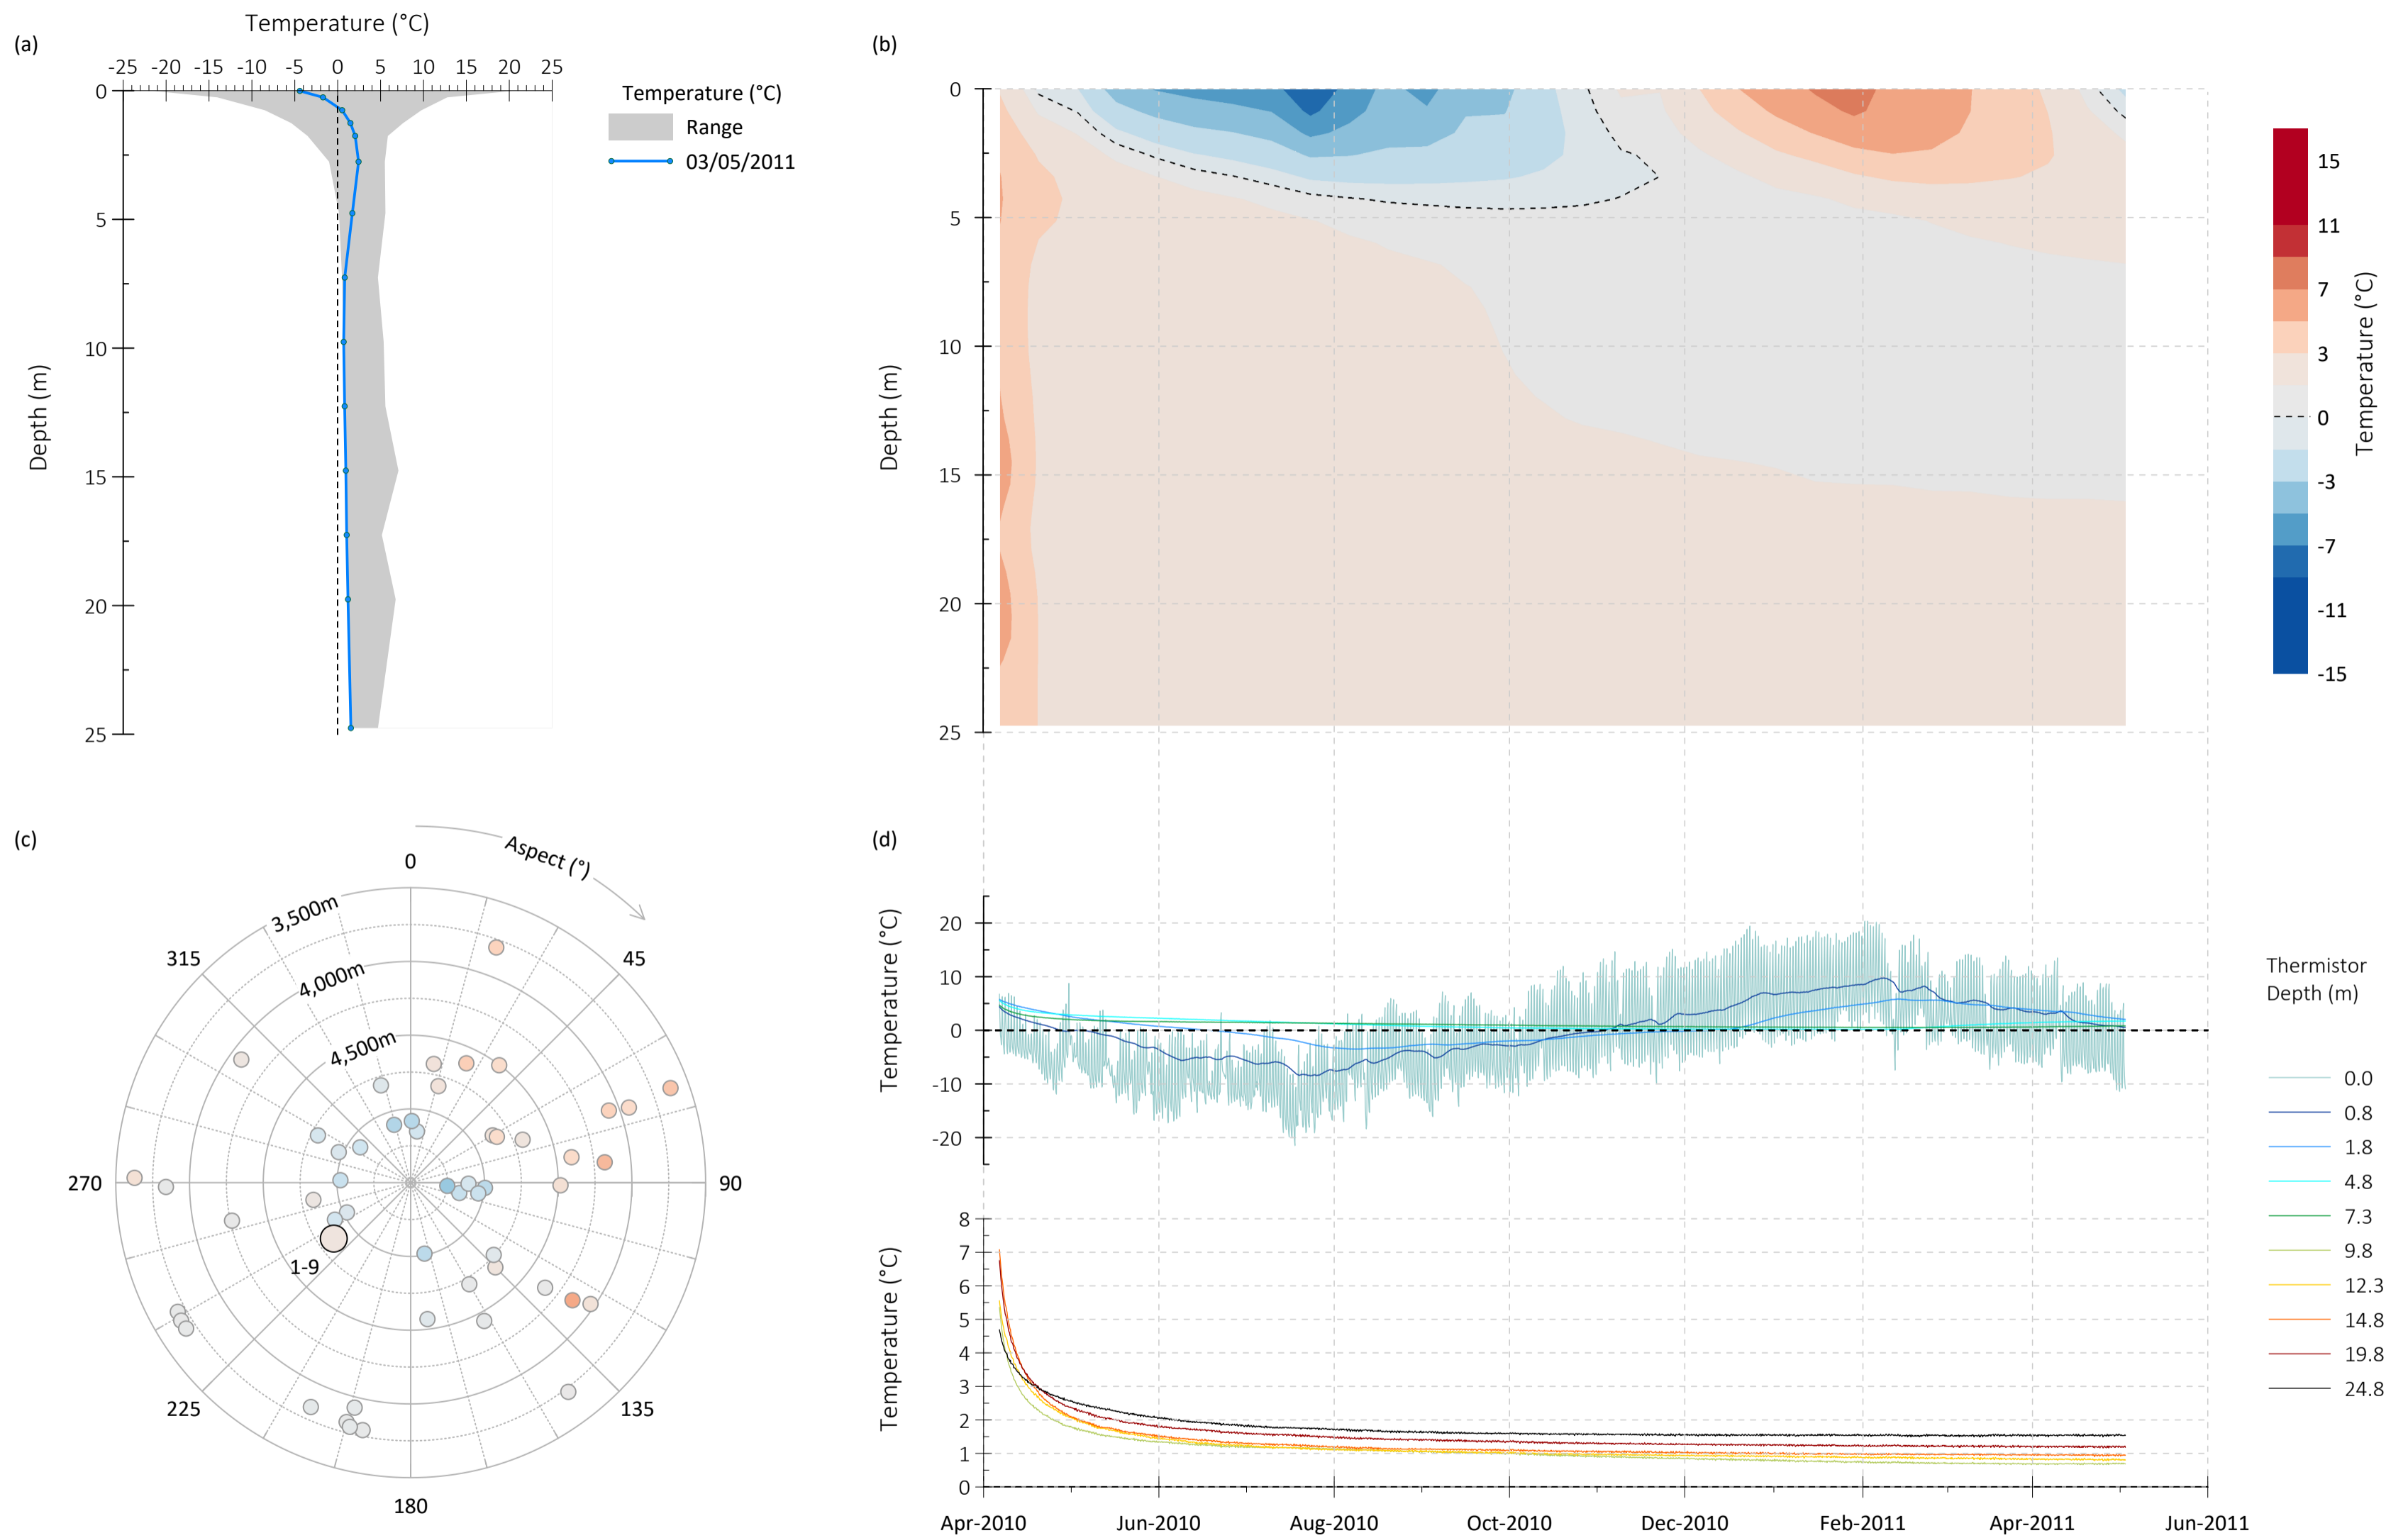

Figure S9: Ground thermal regime for Borehole 1-9 (El. = 4,855 m, Colluvium). Measurements collected approximately every 4 hours between 06/04/2010 and 03/05/2011. Early measurements affected by drilling. Borehole not actively monitored.

(a) Temperature depth profile. Range estimated using hourly raw data. Daily average of most recent available measurements shown in blue.

(b) Interpreted borehole temperature evolution with time. Contours estimated from hourly raw data.

(c) Aspect-elevation-temperature diagram of most recent monthly temperatures below DZAA at all boreholes; colour scale same as plot (b). Borehole 1-9 ( $T = 1.2\text{ }^{\circ}\text{C}$ , depth=19.8 m) is indicated by enlarged symbol.

(d) Raw temperature time-series for selected depths at Borehole 1-9. Full dataset includes measurements from 14 sensors.

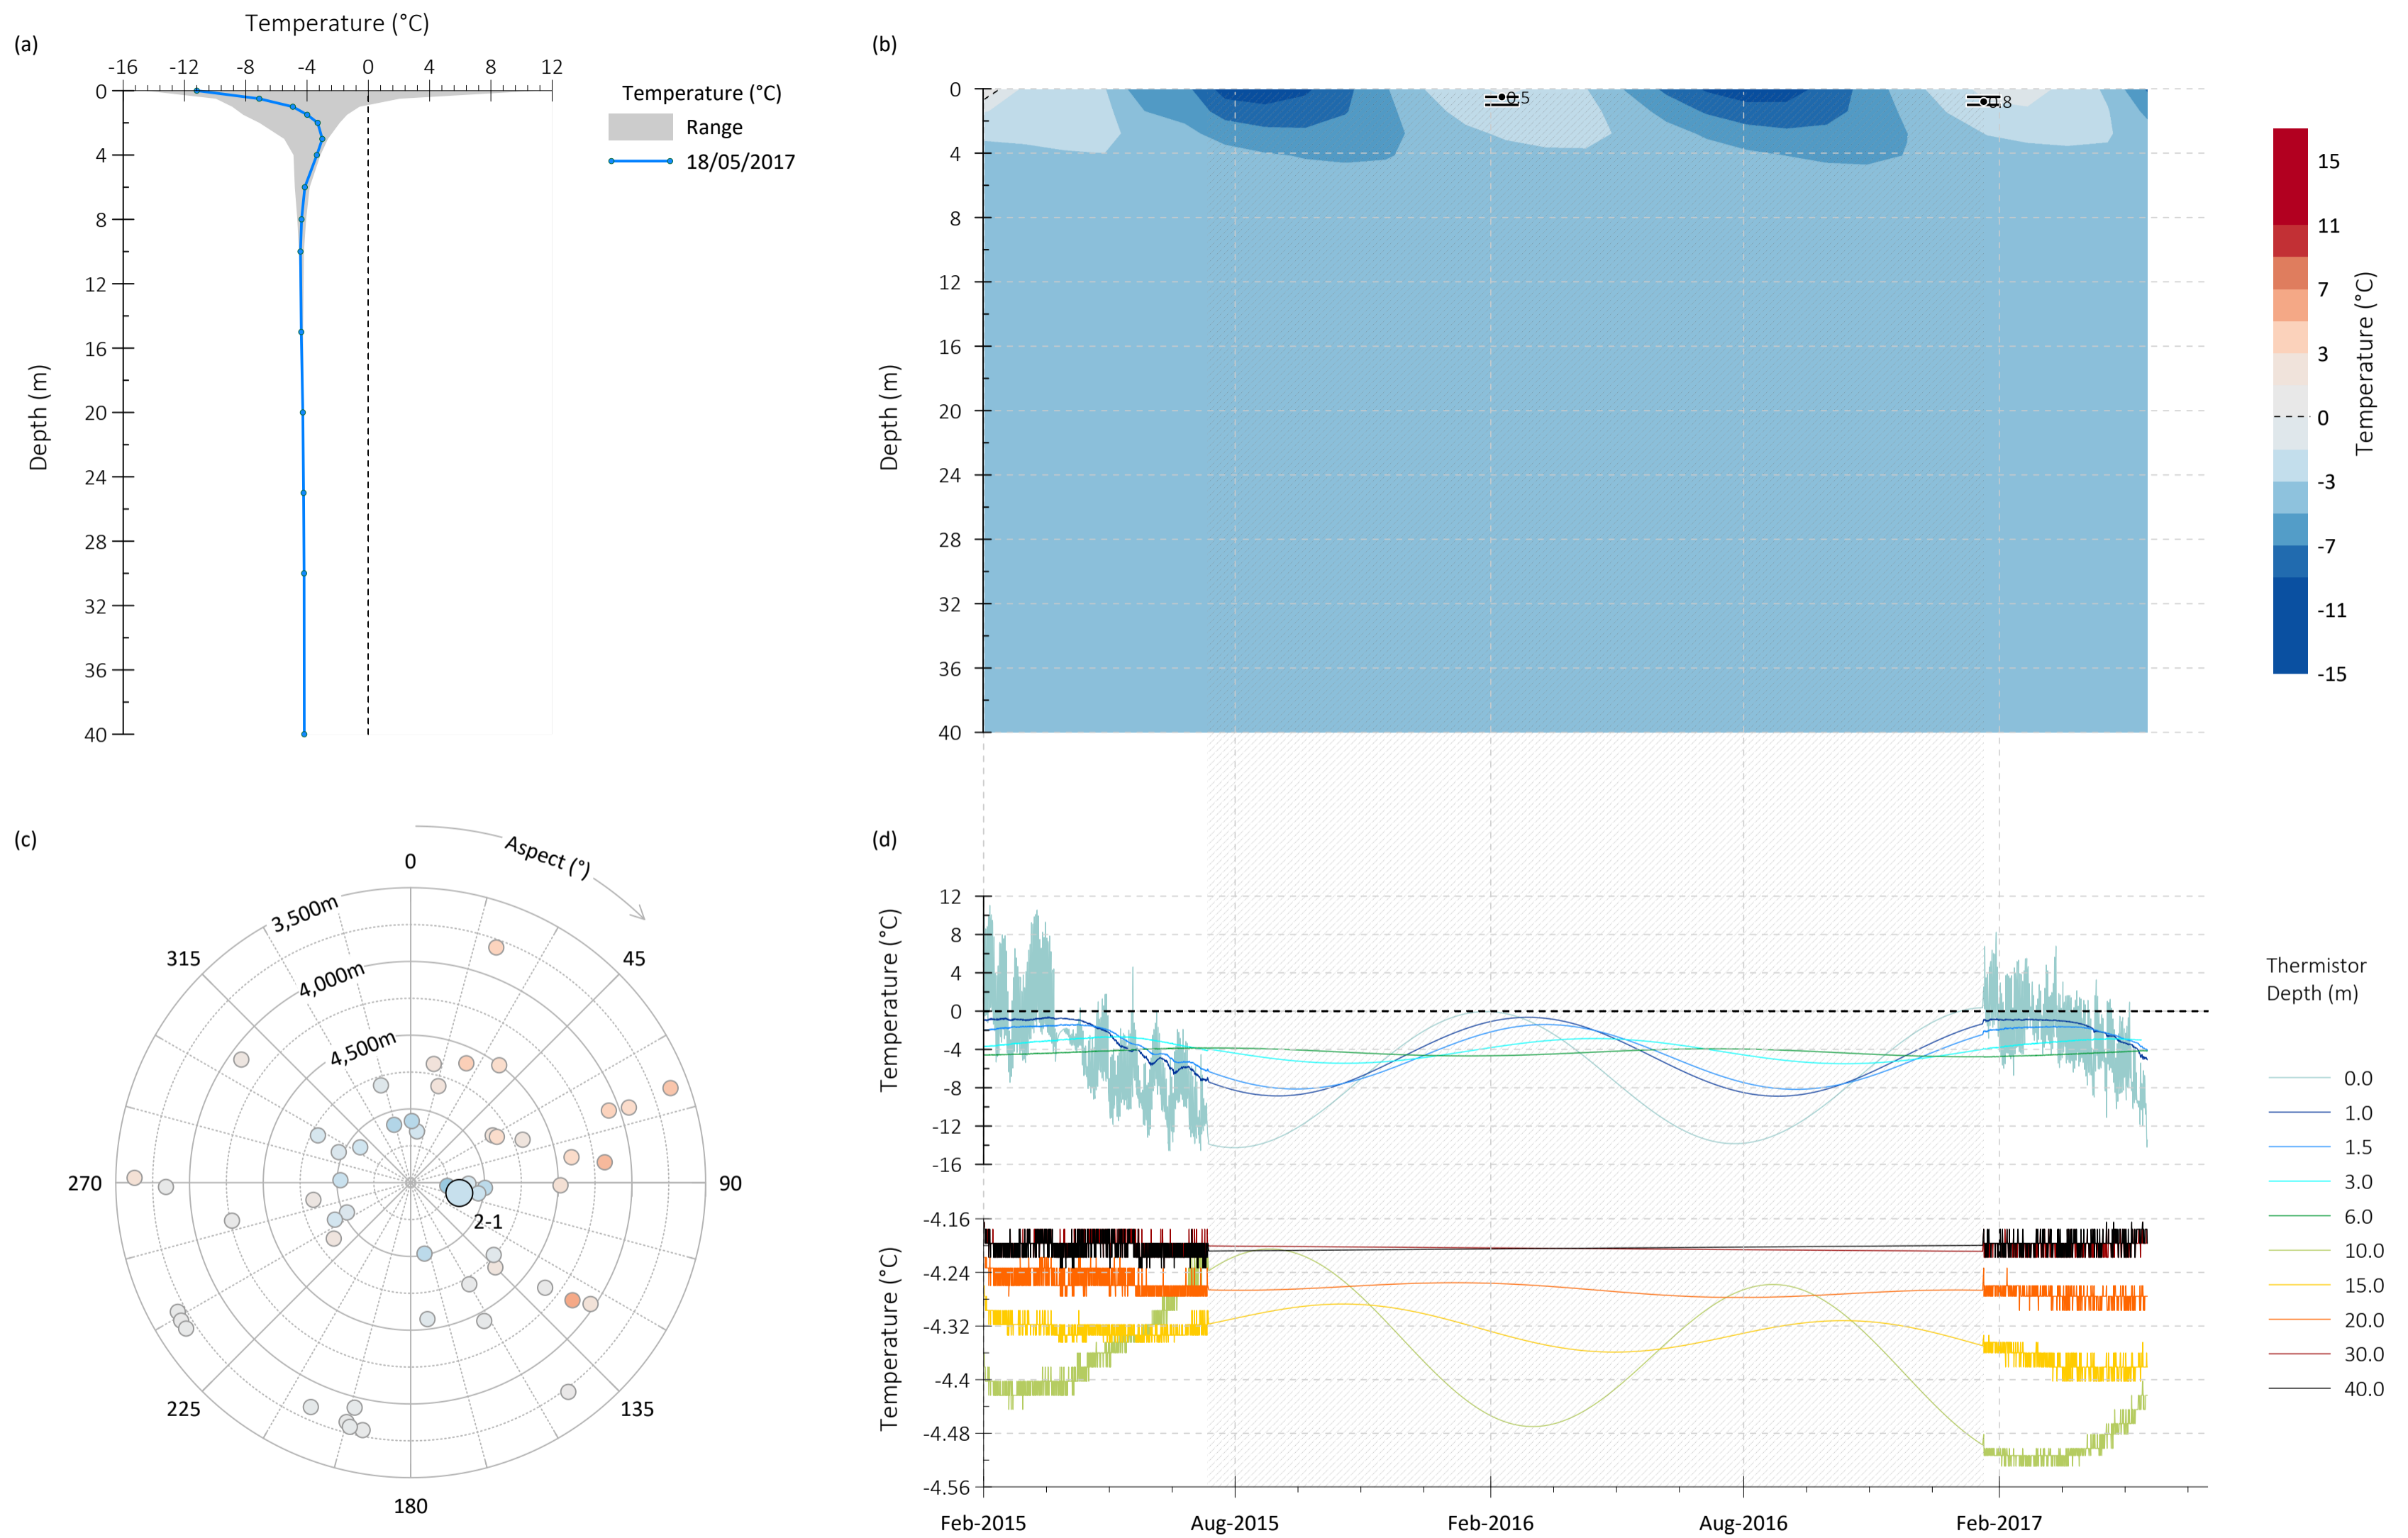

Figure S10: Ground thermal regime for Borehole 2-1 (El. = 5,163 m, Colluvium). Measurements collected approximately every 4 hours between 01/02/2015 and 18/05/2017. Interpolated data indicated by grey hatched areas.

- (a) Temperature depth profile. Range estimated using hourly raw data and interpolated values. Daily average of most recent available measurements shown in blue.
- (b) Interpreted borehole temperature evolution with time. Contours estimated from hourly raw data and interpolated values. Active layer thickness indicated by black dots; horizontal lines indicate the depth of thermistors used for interpolation.
- (c) Aspect-elevation-temperature diagram of most recent monthly temperatures below DZAA at all boreholes; colour scale same as plot (b). Borehole 2-1 ( $T = -4.28$  °C, depth=20 m) is indicated by enlarged symbol.
- (d) Raw temperature time-series for selected depths at Borehole 2-1. Full dataset includes measurements from 15 sensors. Daily interpolated values are also shown.

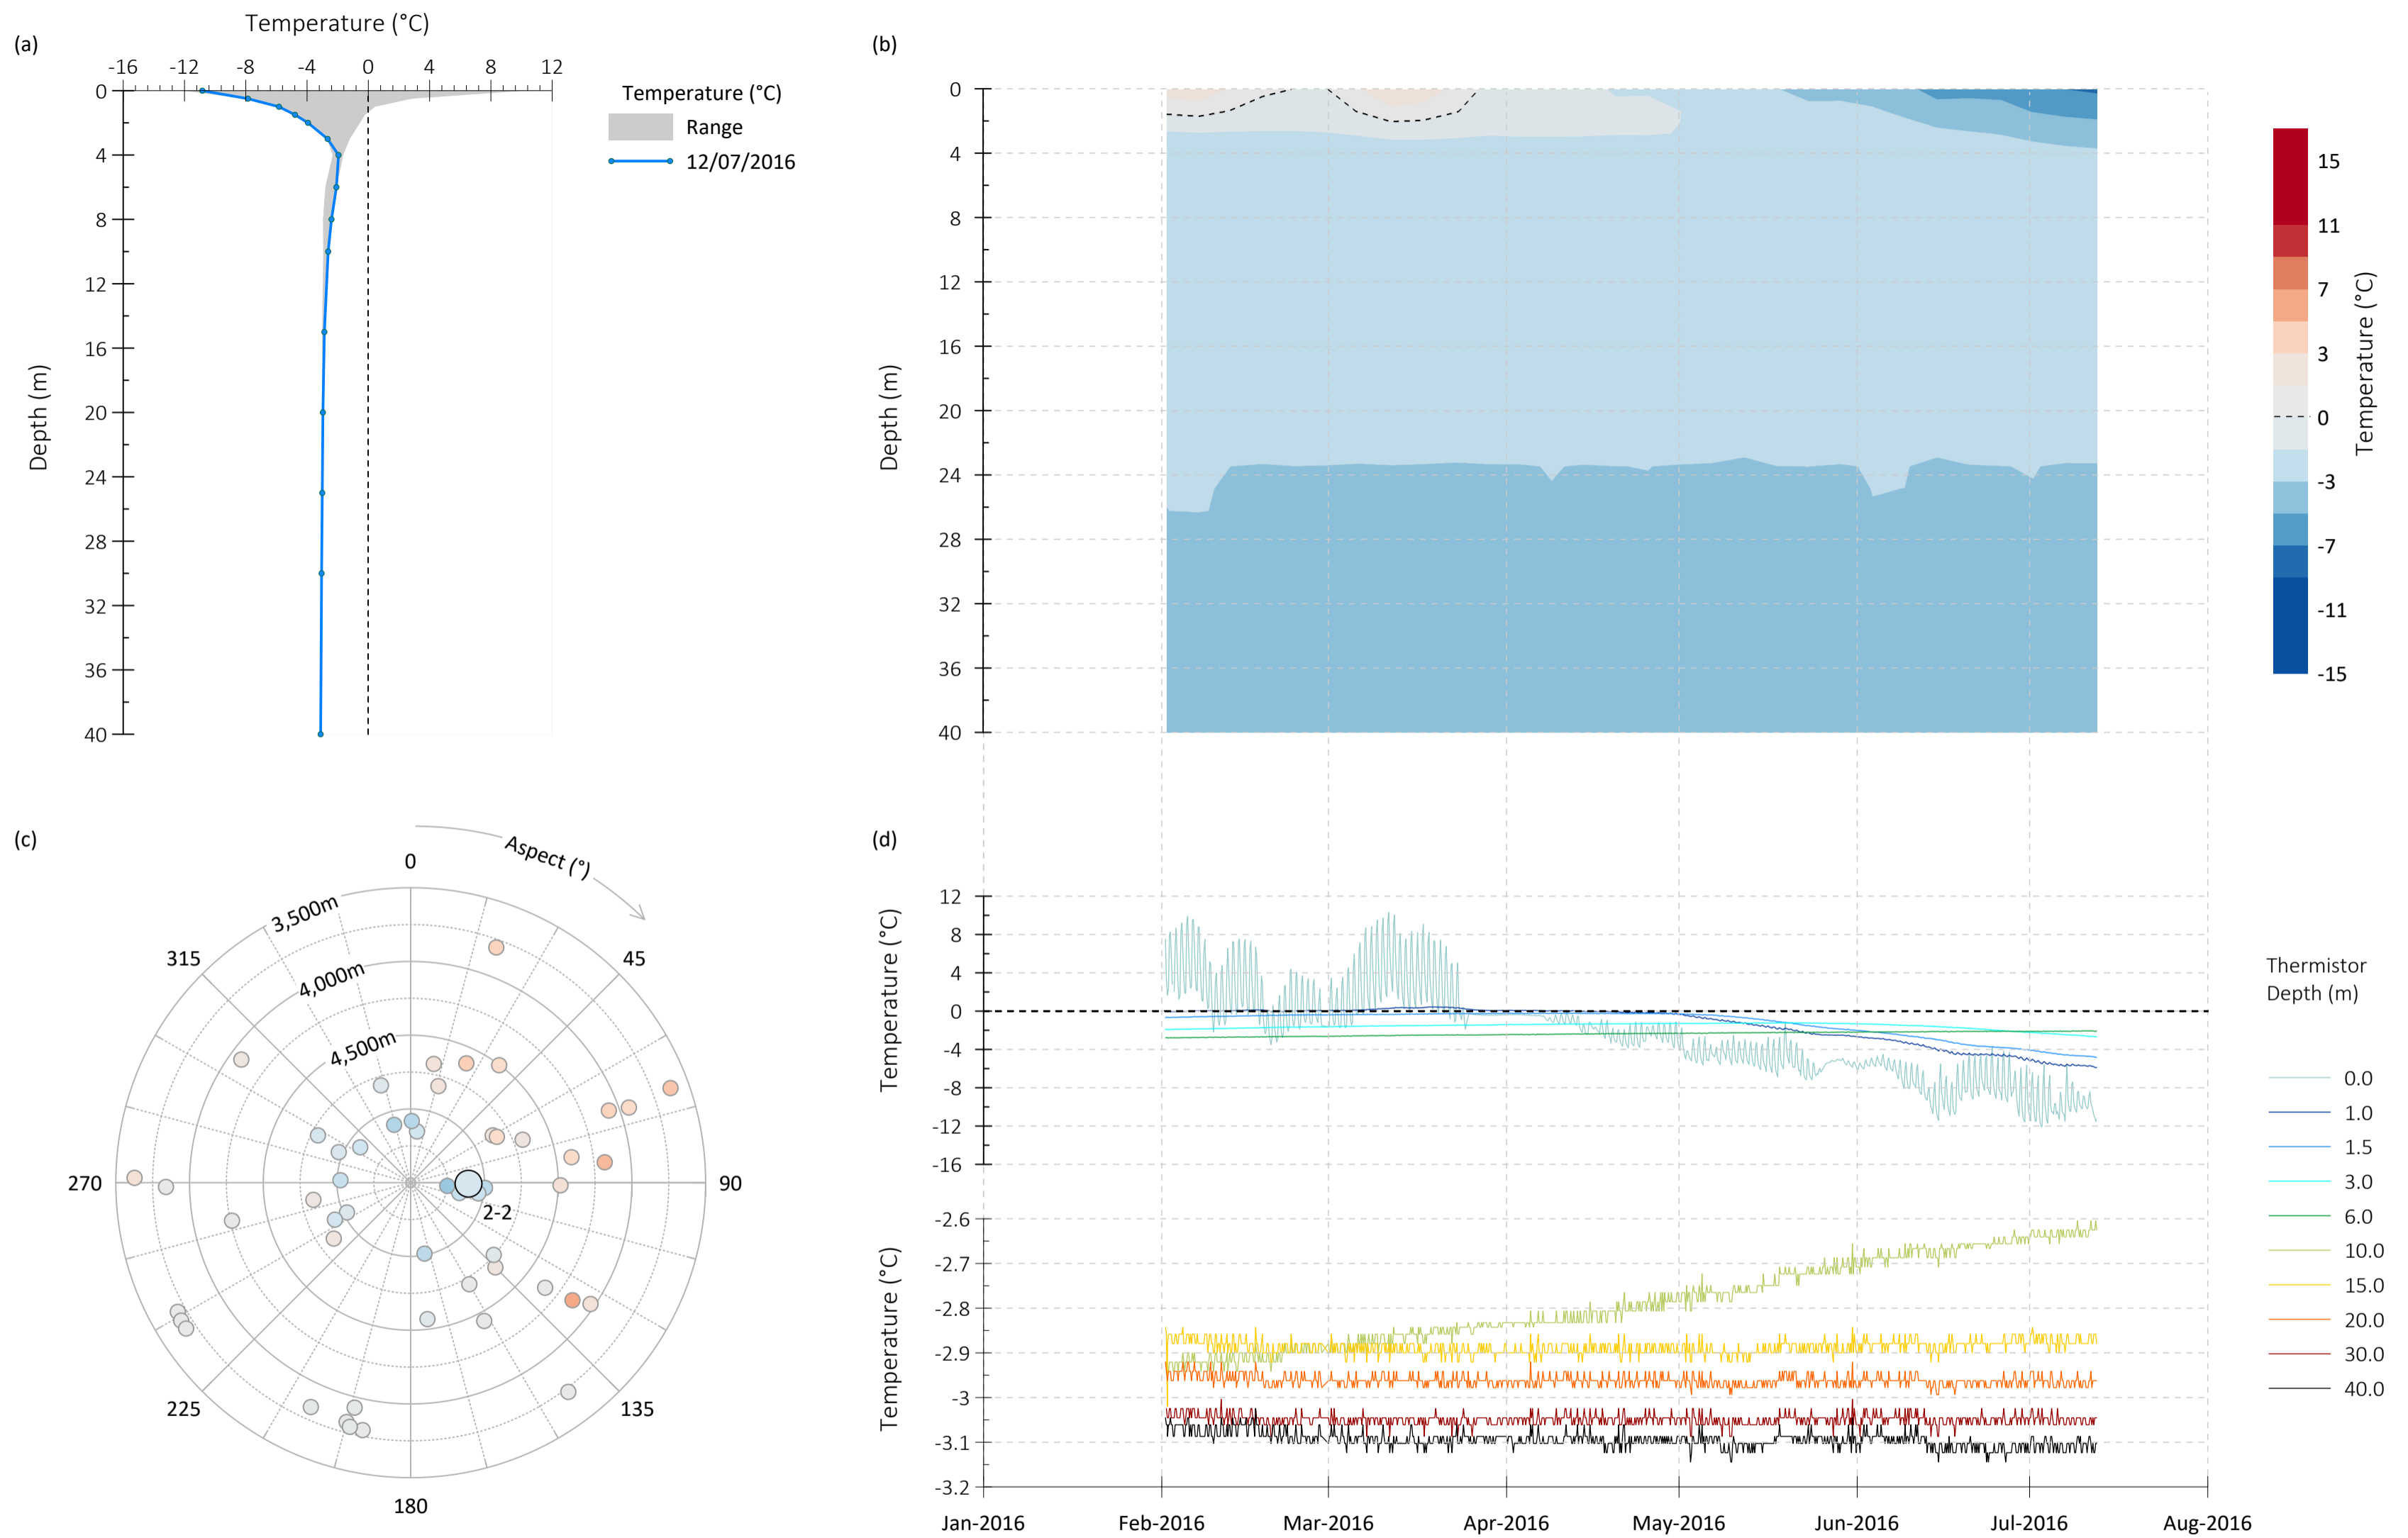

Figure S11: Ground thermal regime for Borehole 2-2 (El. = 5,108 m, Colluvium). Measurements collected approximately every 4 hours between 01/02/2016 and 12/07/2016. Thermistor string relocated to Site 2-3 in March 2017 due to debris flow. Borehole not actively monitored.

(a) Temperature depth profile. Range estimated using hourly raw data. Daily average of most recent available measurements shown in blue.

(b) Interpreted borehole temperature evolution with time. Contours estimated from hourly raw data.

(c) Aspect-elevation-temperature diagram of most recent monthly temperatures below DZAA at all boreholes; colour scale same as plot (b). Borehole 2-2 ( $T = -2.96$  °C, depth=20 m) is indicated by enlarged symbol.

(d) Raw temperature time-series for selected depths at Borehole 2-2. Full dataset includes measurements from 15 sensors.

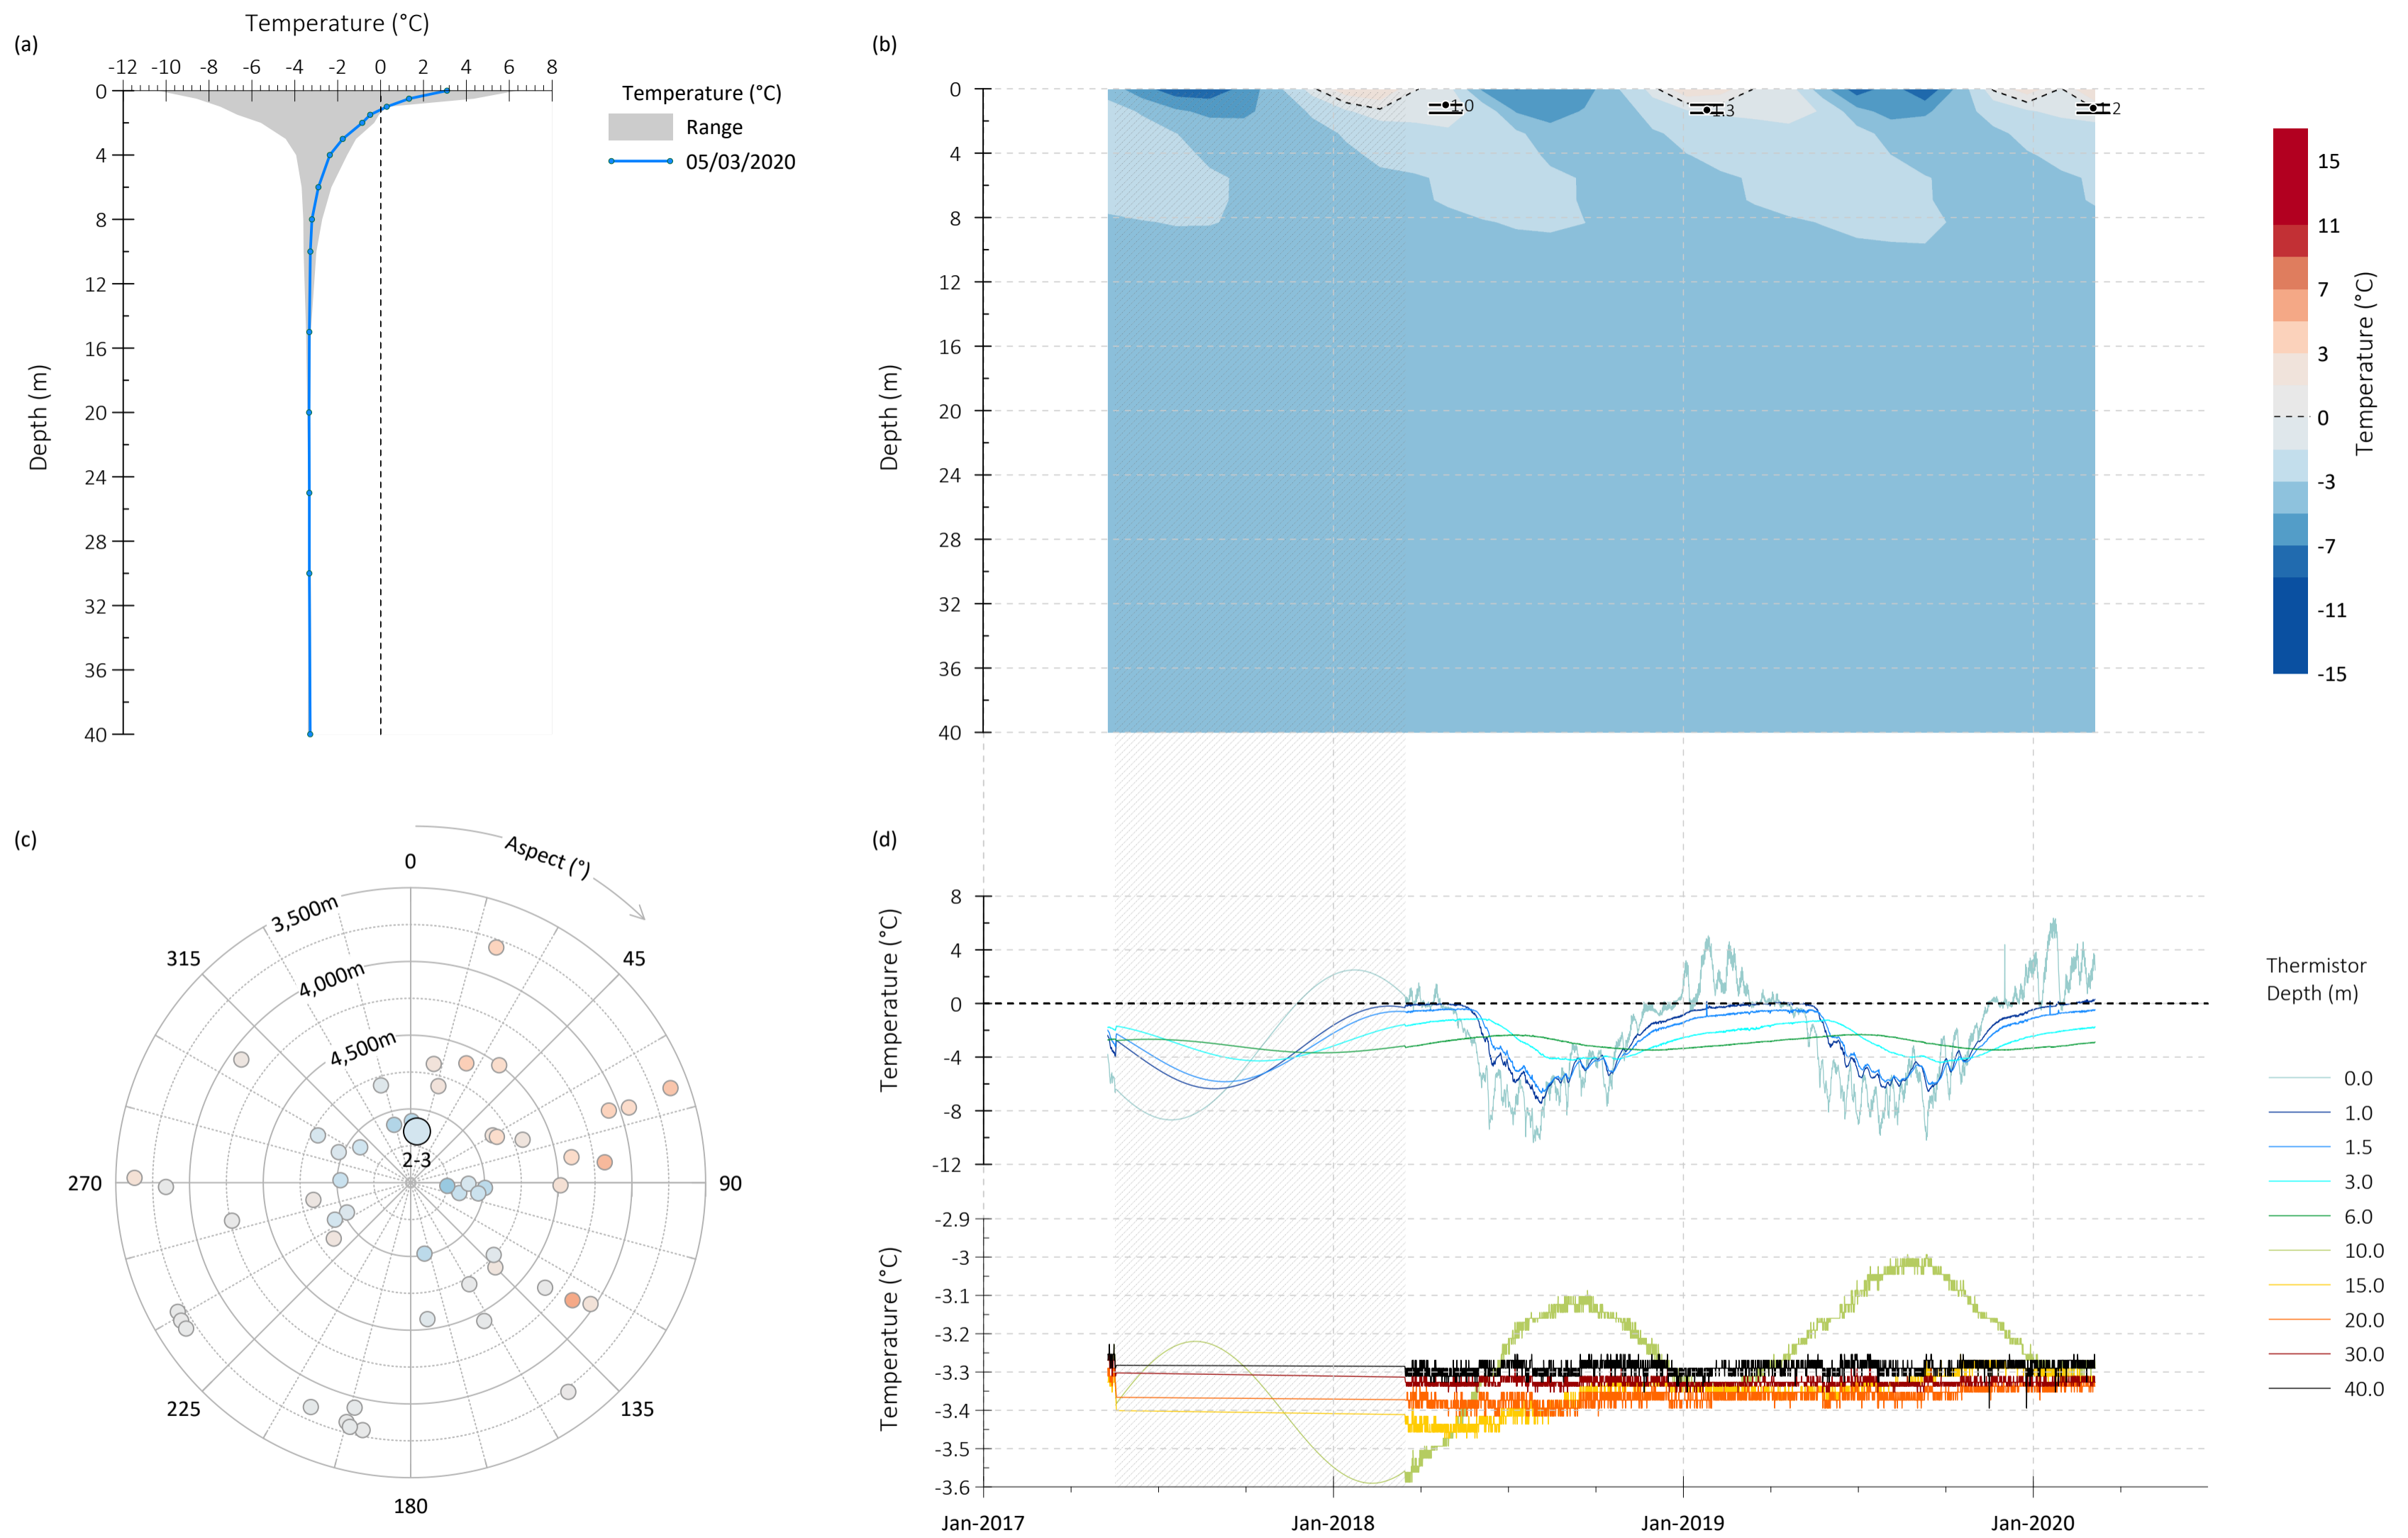

Figure S12: Ground thermal regime for Borehole 2-3 (El. = 5,150 m, Colluvium). Measurements collected approximately every 6 hours between 03/03/2017 and 05/03/2020. Interpolated data indicated by grey hatched areas.

(a) Temperature depth profile. Range estimated using hourly raw data and interpolated values. Daily average of most recent available measurements shown in blue.

(b) Interpreted borehole temperature evolution with time. Contours estimated from hourly raw data and interpolated values. Active layer thickness indicated by black dots; horizontal lines indicate the depth of thermistors used for interpolation.

(c) Aspect-elevation-temperature diagram of most recent monthly temperatures below DZAA at all boreholes; colour scale same as plot (b). Borehole 2-3 ( $T = -3.34$  °C, depth = 20 m) is indicated by enlarged symbol.

(d) Raw temperature time-series for selected depths at Borehole 2-3. Full dataset includes measurements from 15 sensors. Daily interpolated values are also shown.



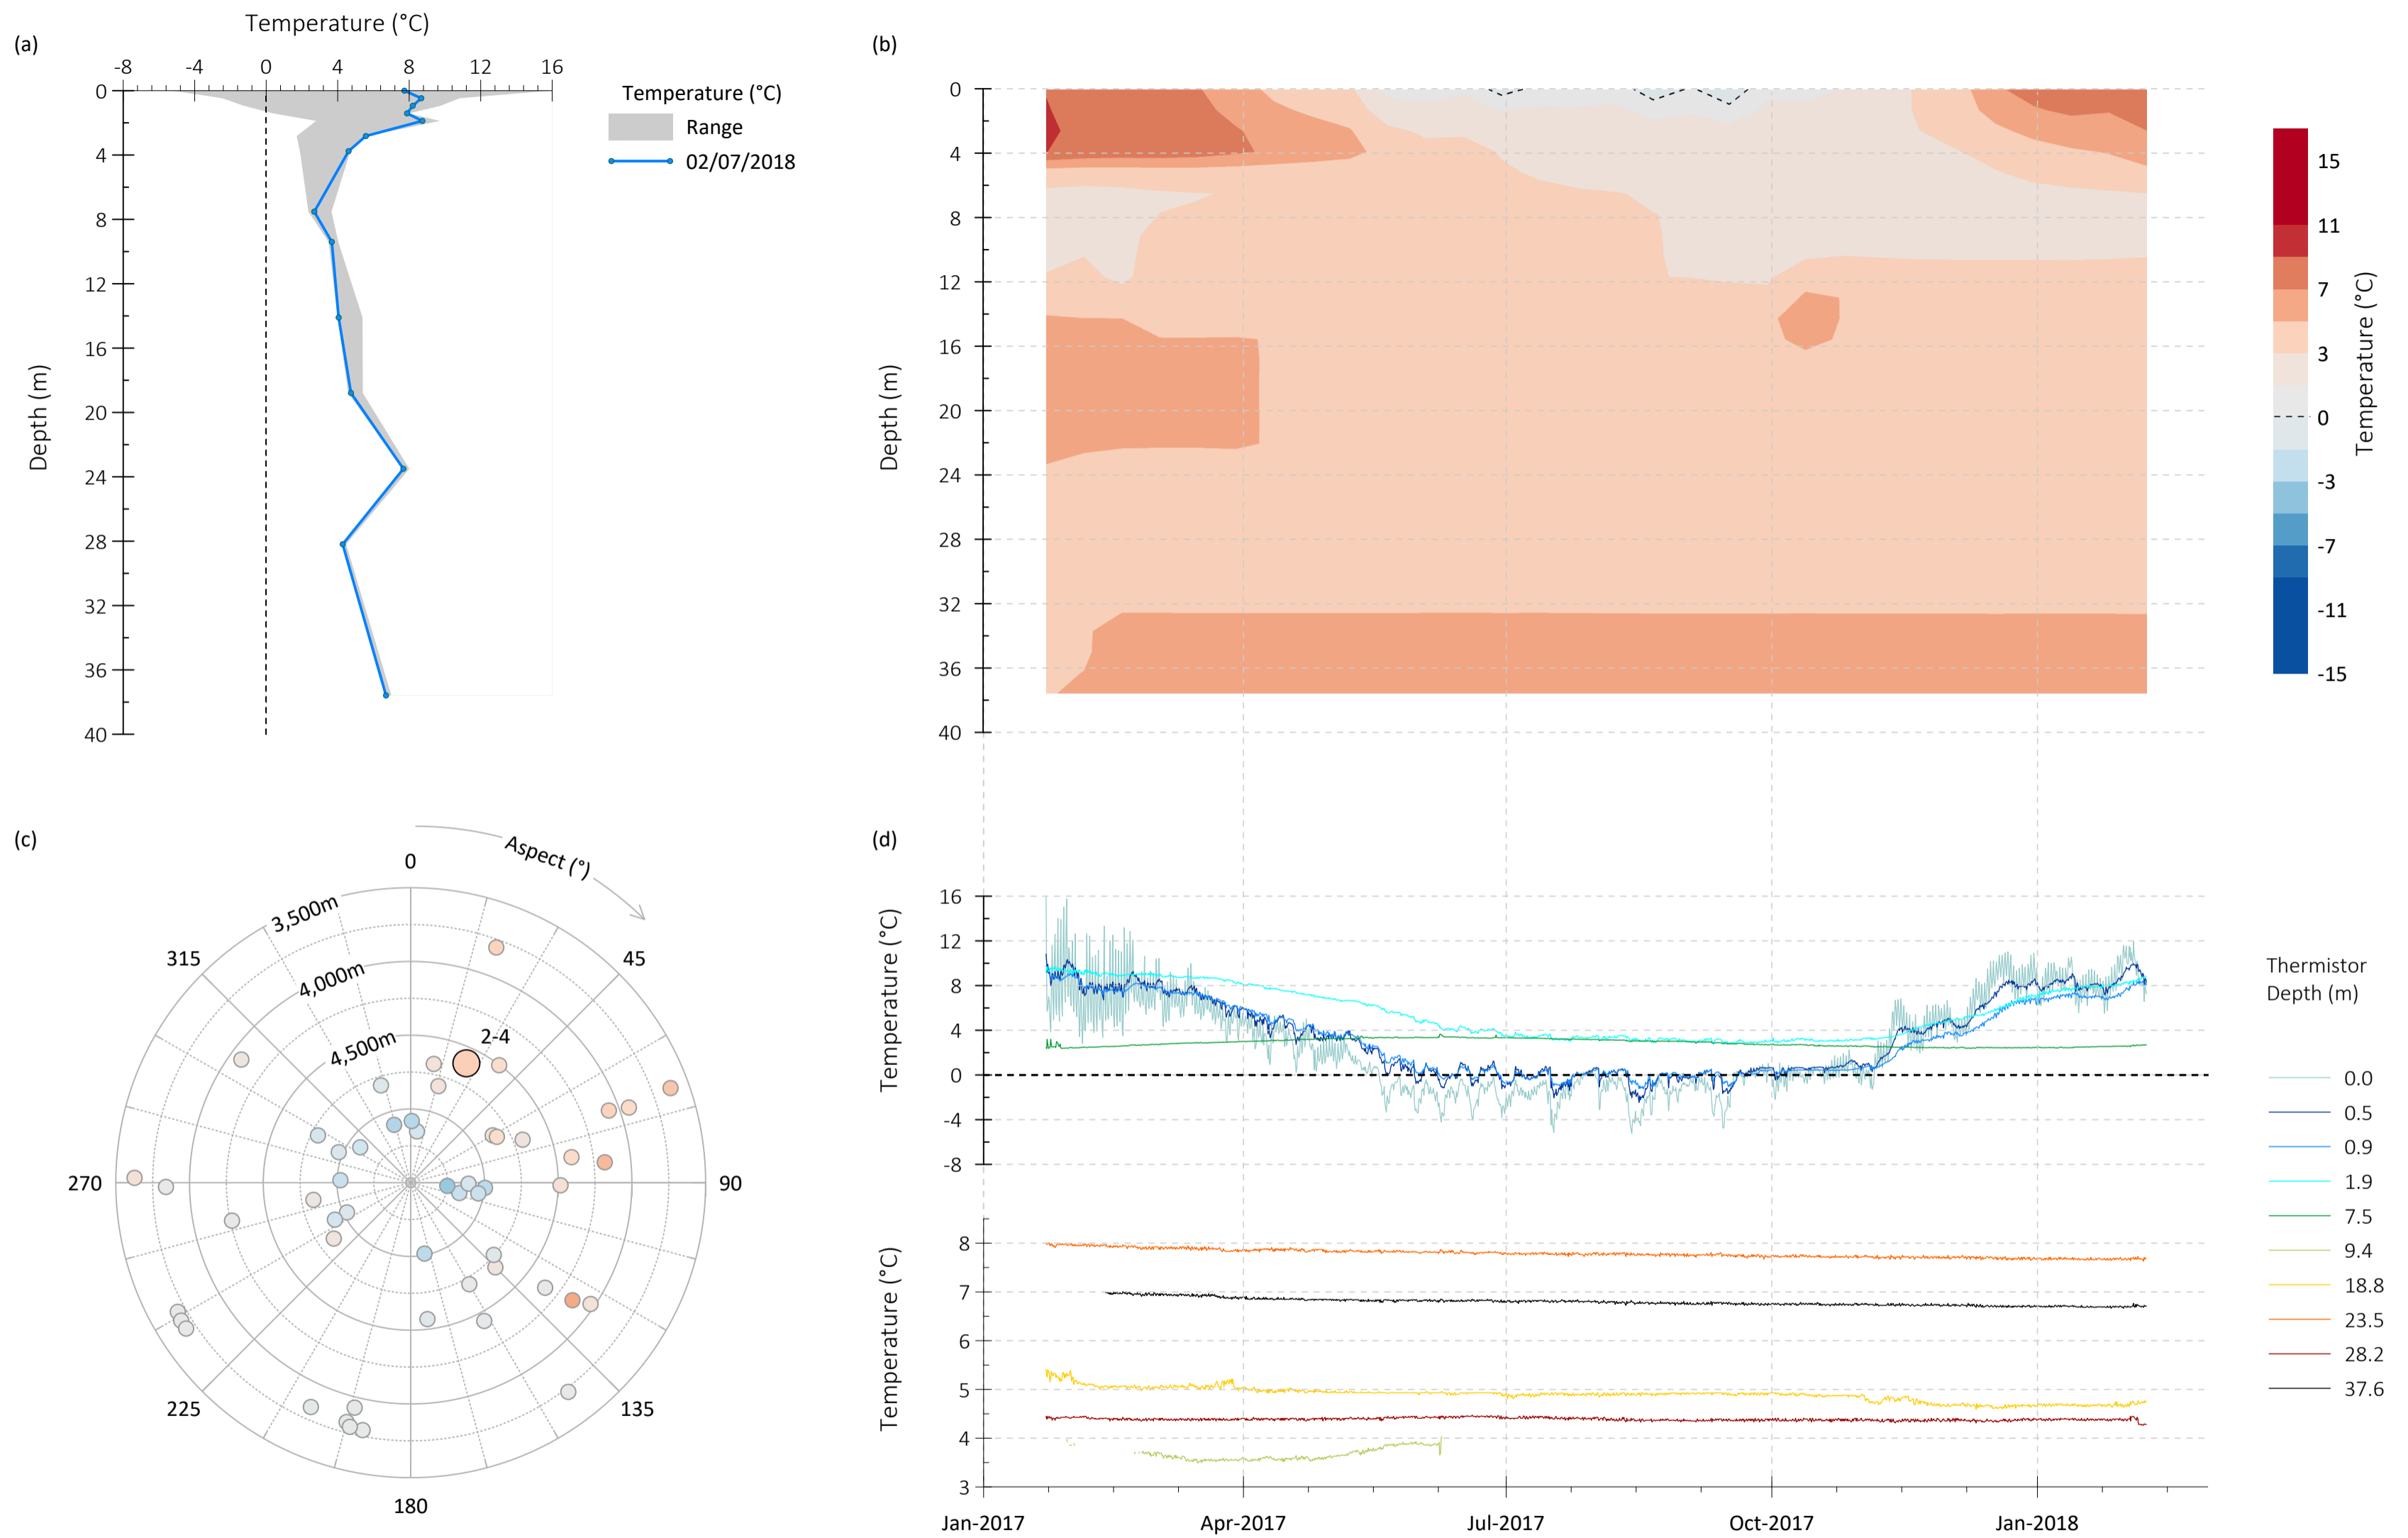

Figure S13: Ground thermal regime for Borehole 2-4 (El. = 4,607 m, Colluvium). Measurements collected approximately every 6 hours between 22/01/2017 and 07/02/2018. Measurement at sensor 23.5 m is erroneous and excluded from analyses and contouring. Thermistor string relocated to Site 2-6 in Feb 2019 to increase likelihood of encountering permafrost. Borehole not actively monitored.

- (a) Temperature depth profile. Range estimated using hourly raw data. Daily average of most recent available measurements shown in blue.  
 (b) Interpreted borehole temperature evolution with time. Contours estimated from hourly raw data.  
 (c) Aspect-elevation-temperature diagram of most recent monthly temperatures below DZAA at all boreholes; colour scale same as plot (b). Borehole 2-4 ( $T = 4.72\text{ }^{\circ}\text{C}$ , depth=18.8 m) is indicated by enlarged symbol.  
 (d) Raw temperature time-series for selected depths at Borehole 2-4. Full dataset includes measurements from 14 sensors.

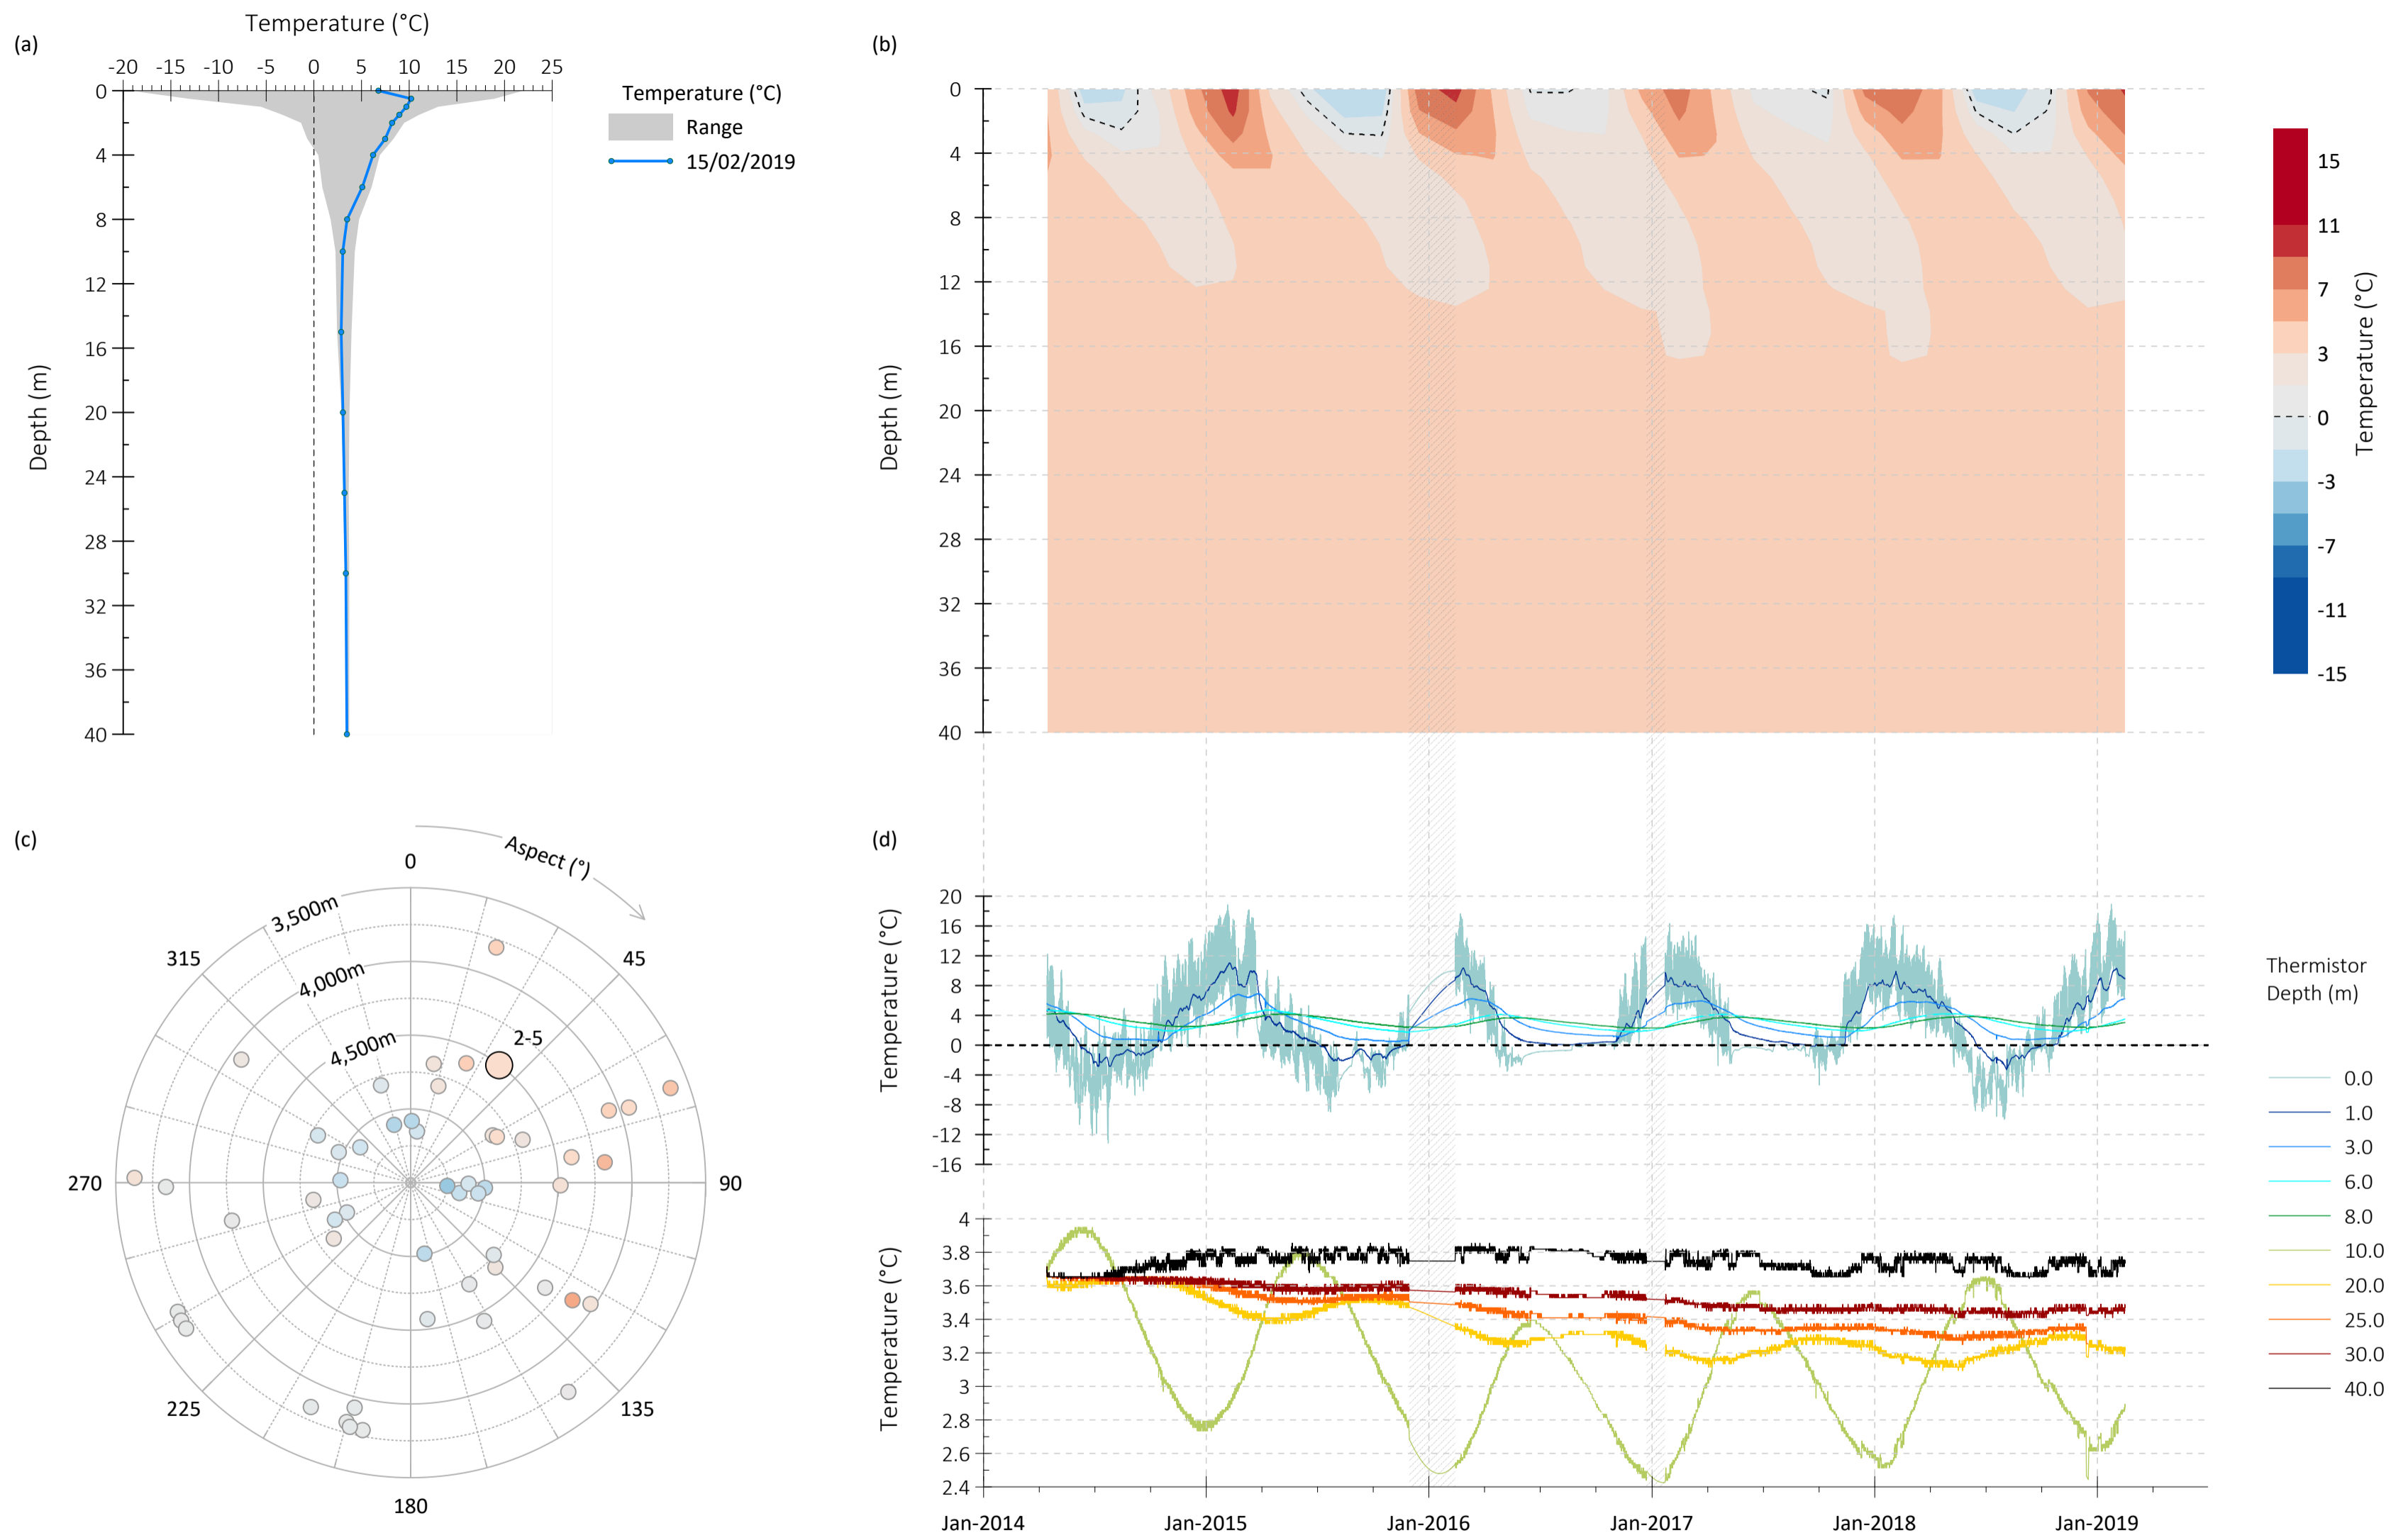

Figure S14: Ground thermal regime for Borehole 2-5 (El. = 4,503 m, Colluvium). Measurements collected approximately every 4 hours between 14/04/2014 and 15/02/2019. Interpolated data indicated by grey hatched areas. Thermistor string relocated to Site 2-7 in Feb 2019 to increase likelihood of encountering permafrost. Borehole not actively monitored.

(a) Temperature depth profile. Range estimated using hourly raw data and interpolated values. Daily average of most recent available measurements shown in blue.

(b) Interpreted borehole temperature evolution with time. Contours estimated from hourly raw data and interpolated values.

(c) Aspect-elevation-temperature diagram of most recent monthly temperatures below DZAA at all boreholes; colour scale same as plot (b). Borehole 2-5 (T = 3.24 °C, depth = 25 m) is indicated by enlarged symbol.

(d) Raw temperature time-series for selected depths at Borehole 2-5. Full dataset includes measurements from 15 sensors. Daily interpolated values are also shown.

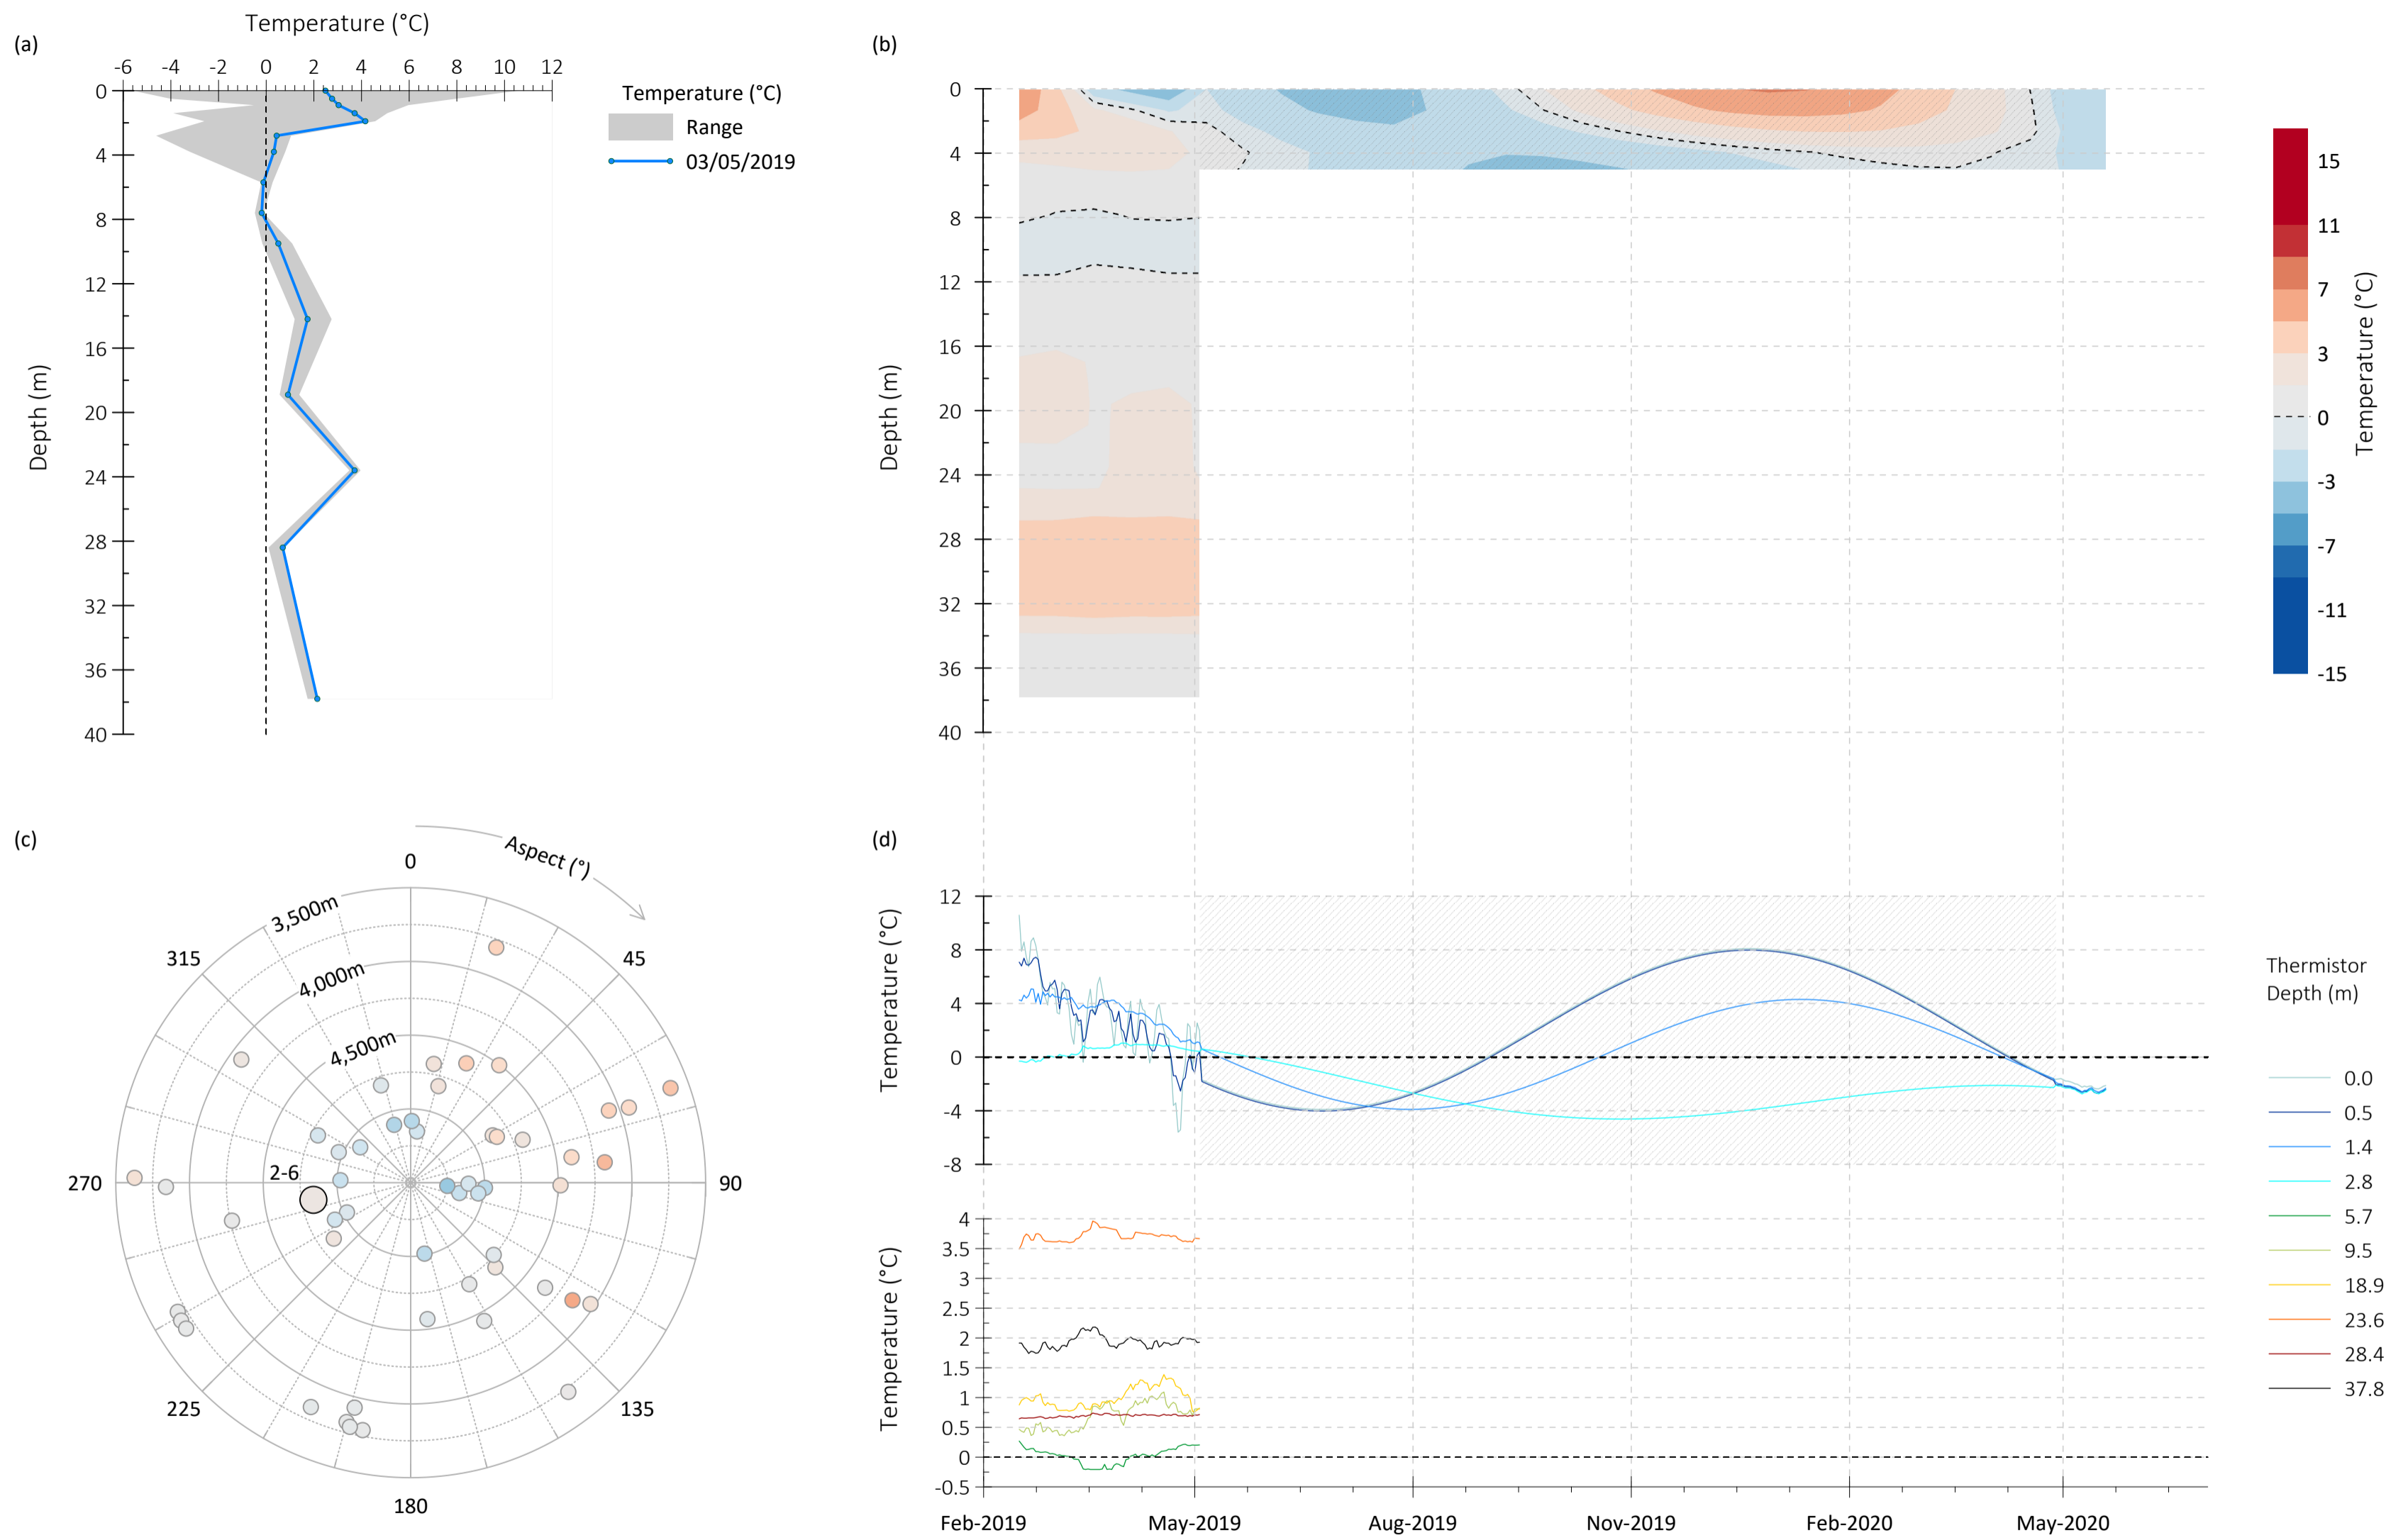

Figure S15: Ground thermal regime for Borehole 2-6 (El. = 4,830 m, Colluvium). Daily measurements collected between 16/02/2019 and 19/05/2020. Interpolated data indicated by grey hatched areas. No data after 3/5/2019 for sensors at 0.9 m and below 5m depth. Measurement at sensor 23.6 m is erroneous and excluded from analyses and contouring.

(a) Temperature depth profile. Range estimated using daily raw data and interpolated values. Most recent available measurement shown in blue.

(b) Interpreted borehole temperature evolution with time. Contours estimated from daily raw data and interpolated values.

(c) Aspect-elevation-temperature diagram of most recent monthly temperatures below DZAA at all boreholes; colour scale same as plot (b). Borehole 2-6 ( $T = 0.79\text{ }^{\circ}\text{C}$ , depth=18.9 m) is indicated by enlarged symbol.

(d) Raw temperature time-series for selected depths at Borehole 2-6. Full dataset includes measurements from 15 sensors. Daily interpolated values are also shown.

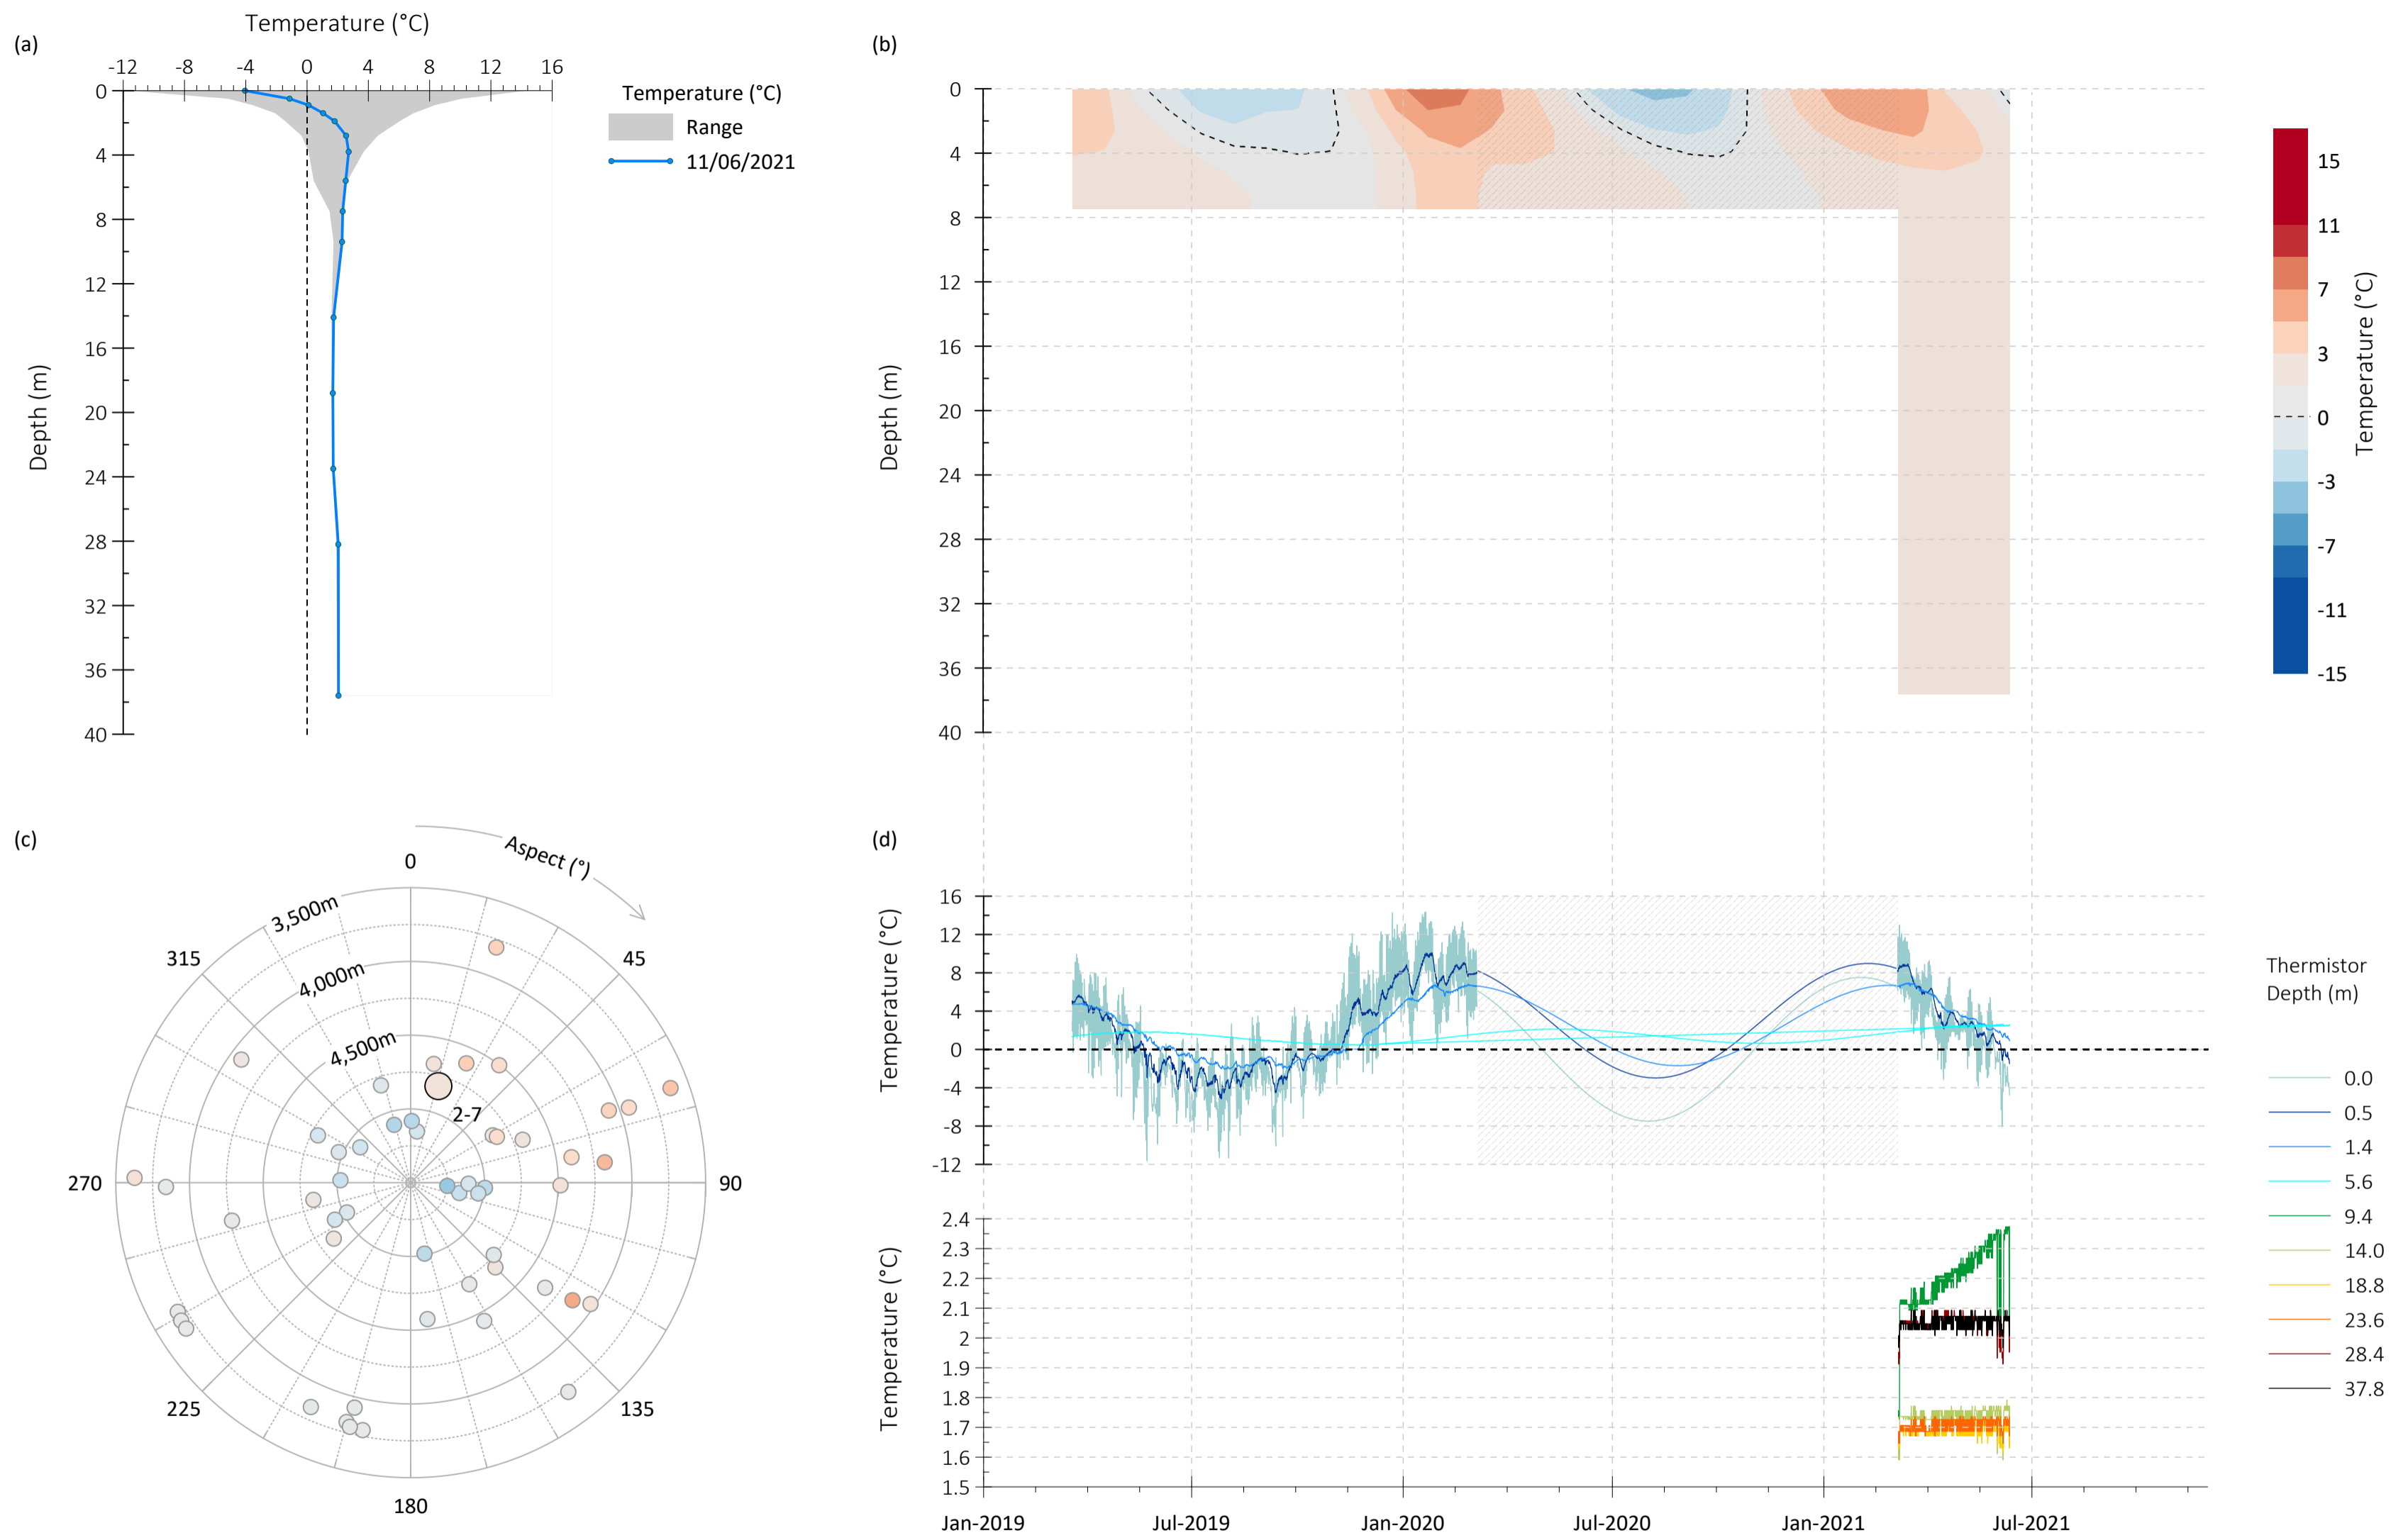

Figure S16: Ground thermal regime for Borehole 2-7 (El. = 4,819 m, Colluvium). Measurements collected approximately every 6 hours between 18/03/2019 and 11/06/2021. Interpolated data indicated by grey hatched areas. No data before 03/06/2021 below 7m depth.

(a) Temperature depth profile. Range estimated using hourly raw data and interpolated values. Daily average of most recent available measurements shown in blue.

(b) Interpreted borehole temperature evolution with time. Contours estimated from hourly raw data and interpolated values.

(c) Aspect-elevation-temperature diagram of most recent monthly temperatures below DZAA at all boreholes; colour scale same as plot (b). Borehole 2-7 ( $T = 1.68\text{ }^{\circ}\text{C}$ , depth=18.8 m) is indicated by enlarged symbol.

(d) Raw temperature time-series for selected depths at Borehole 2-7. Full dataset includes measurements from 15 sensors. Daily interpolated values are also shown.

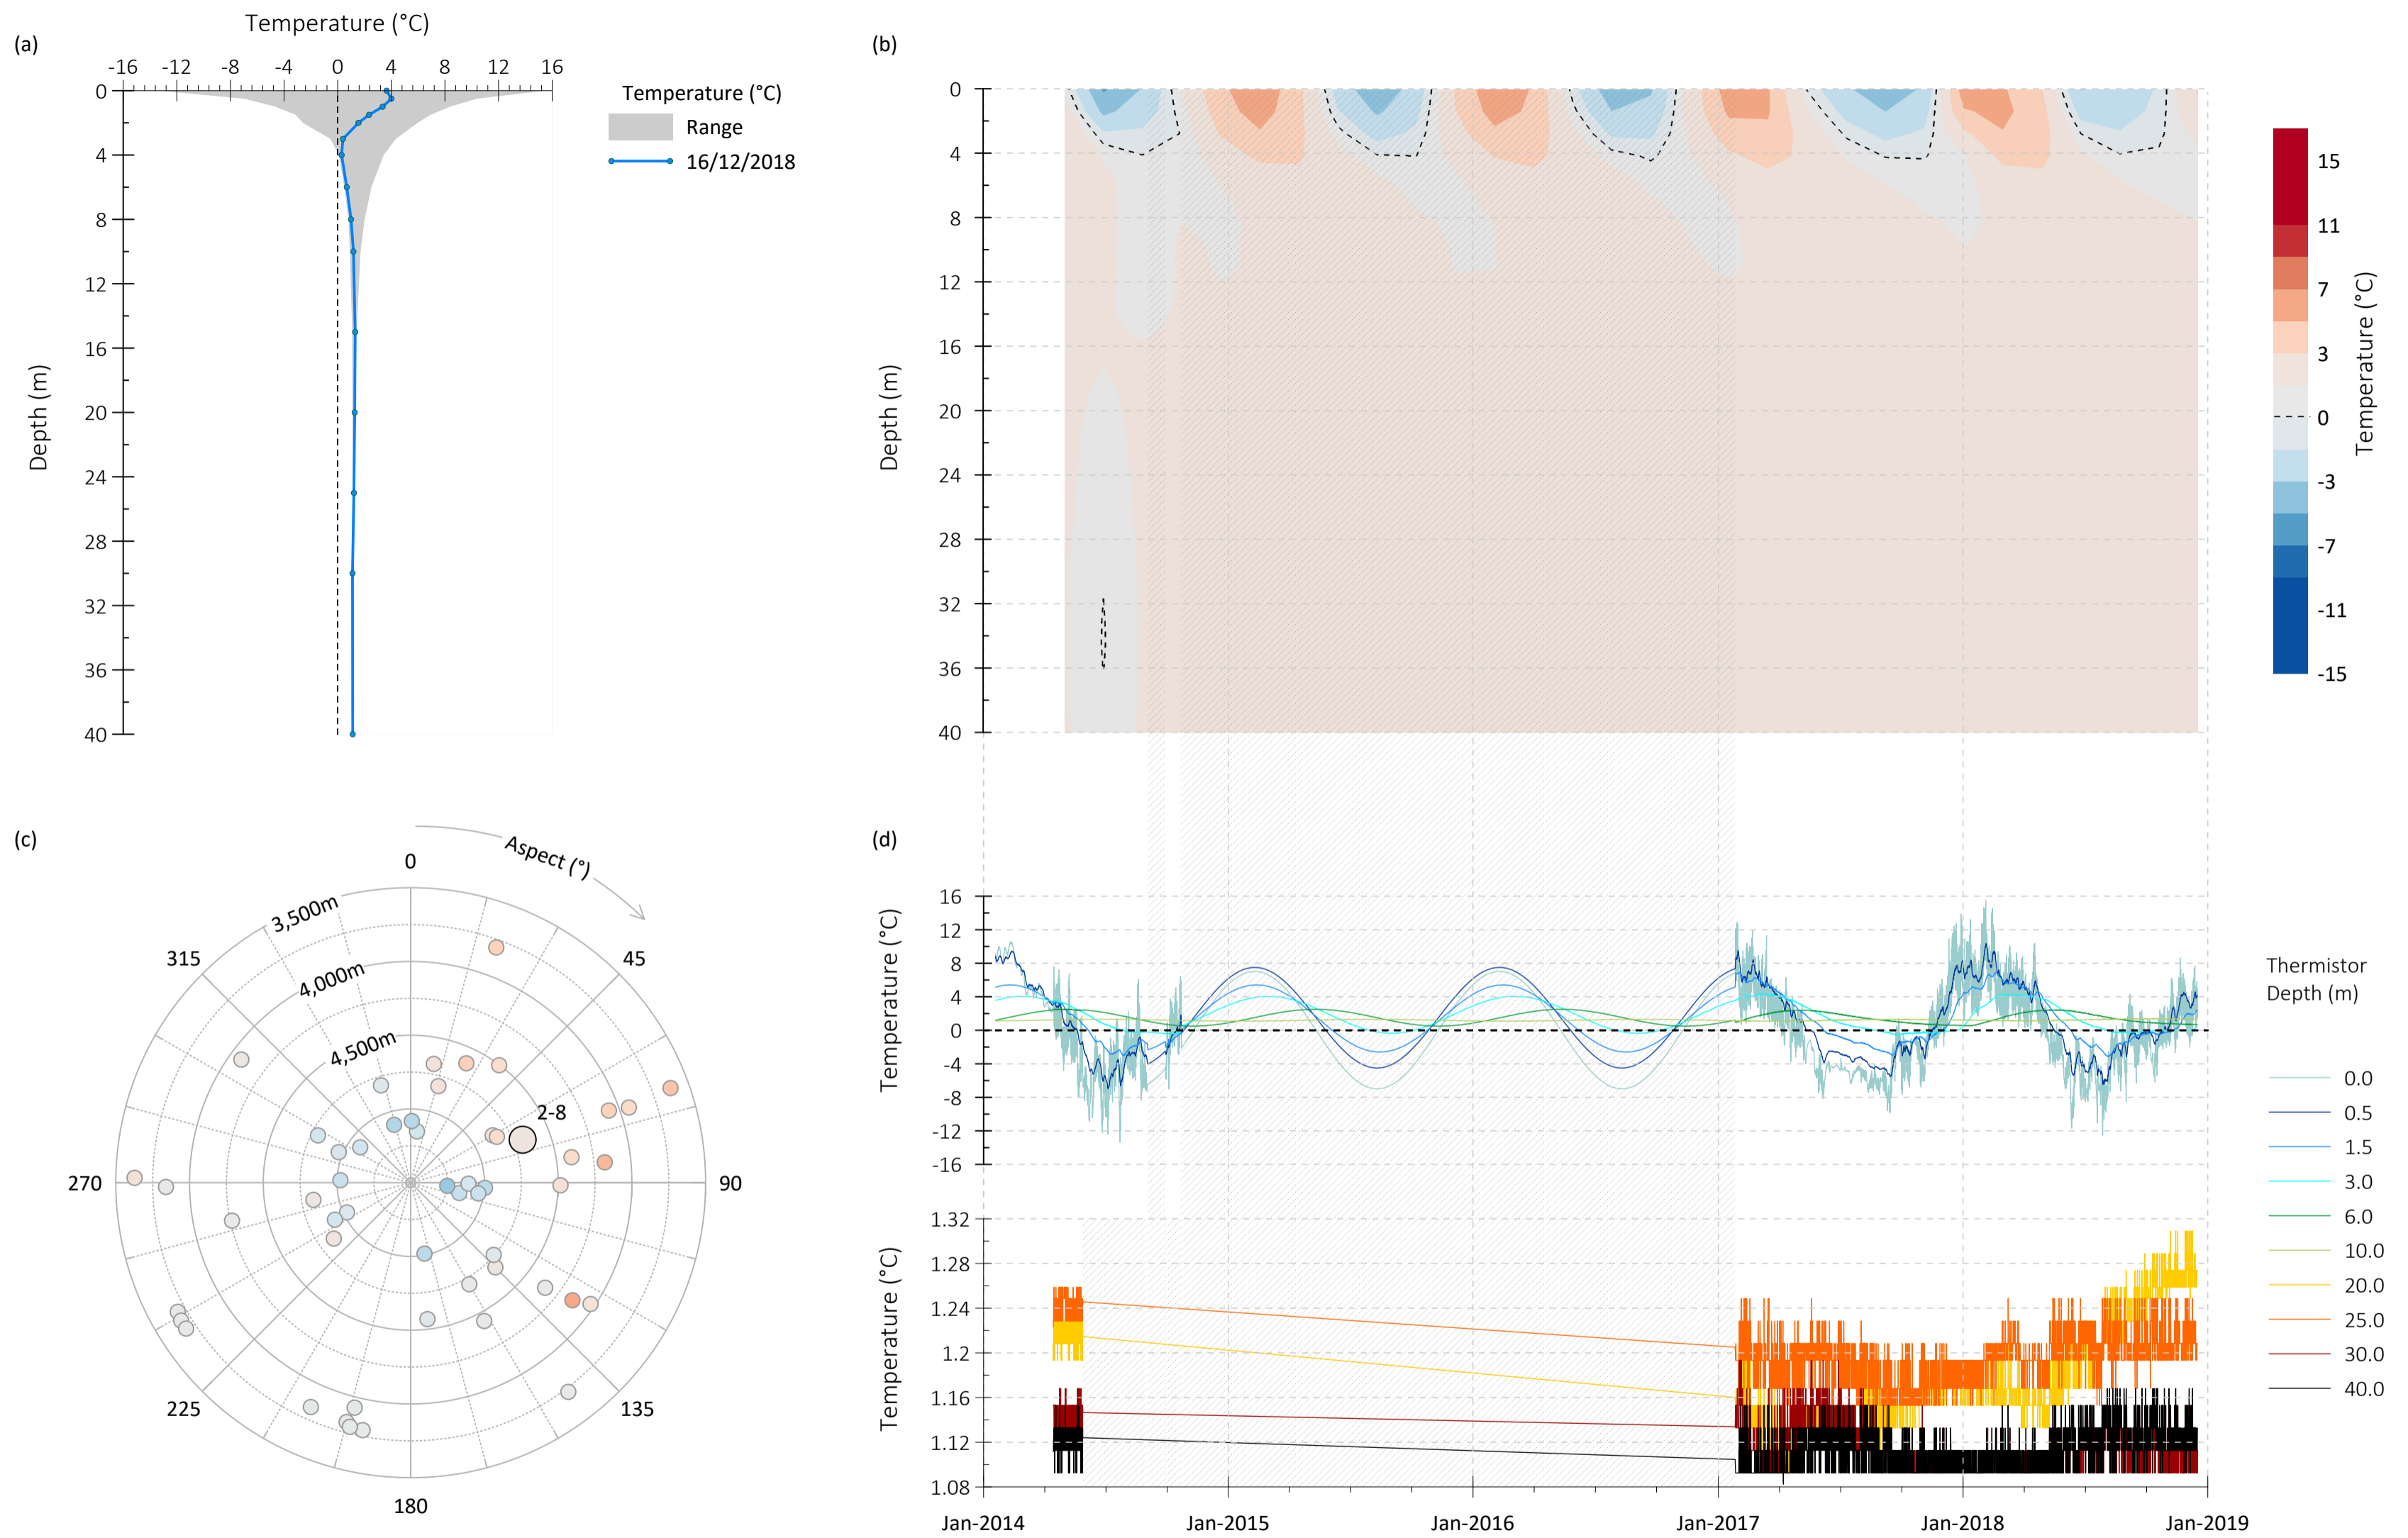

Figure S17: Ground thermal regime for Borehole 2-8 (El. = 4,687 m, Colluvium). Measurements collected approximately every 4 hours between 18/01/2014 and 16/12/2018. Interpolated data indicated by grey hatched areas.

(a) Temperature depth profile. Range estimated using hourly raw data and interpolated values. Daily average of most recent available measurements shown in blue.

(b) Interpreted borehole temperature evolution with time. Contours estimated from hourly raw data and interpolated values.

(c) Aspect-elevation-temperature diagram of most recent monthly temperatures below DZAA at all boreholes; colour scale same as plot (b). Borehole 2-8 (T = 1.28 °C, depth = 20 m) is indicated by enlarged symbol.

(d) Raw temperature time-series for selected depths at Borehole 2-8. Full dataset includes measurements from 15 sensors. Daily interpolated values are also shown.

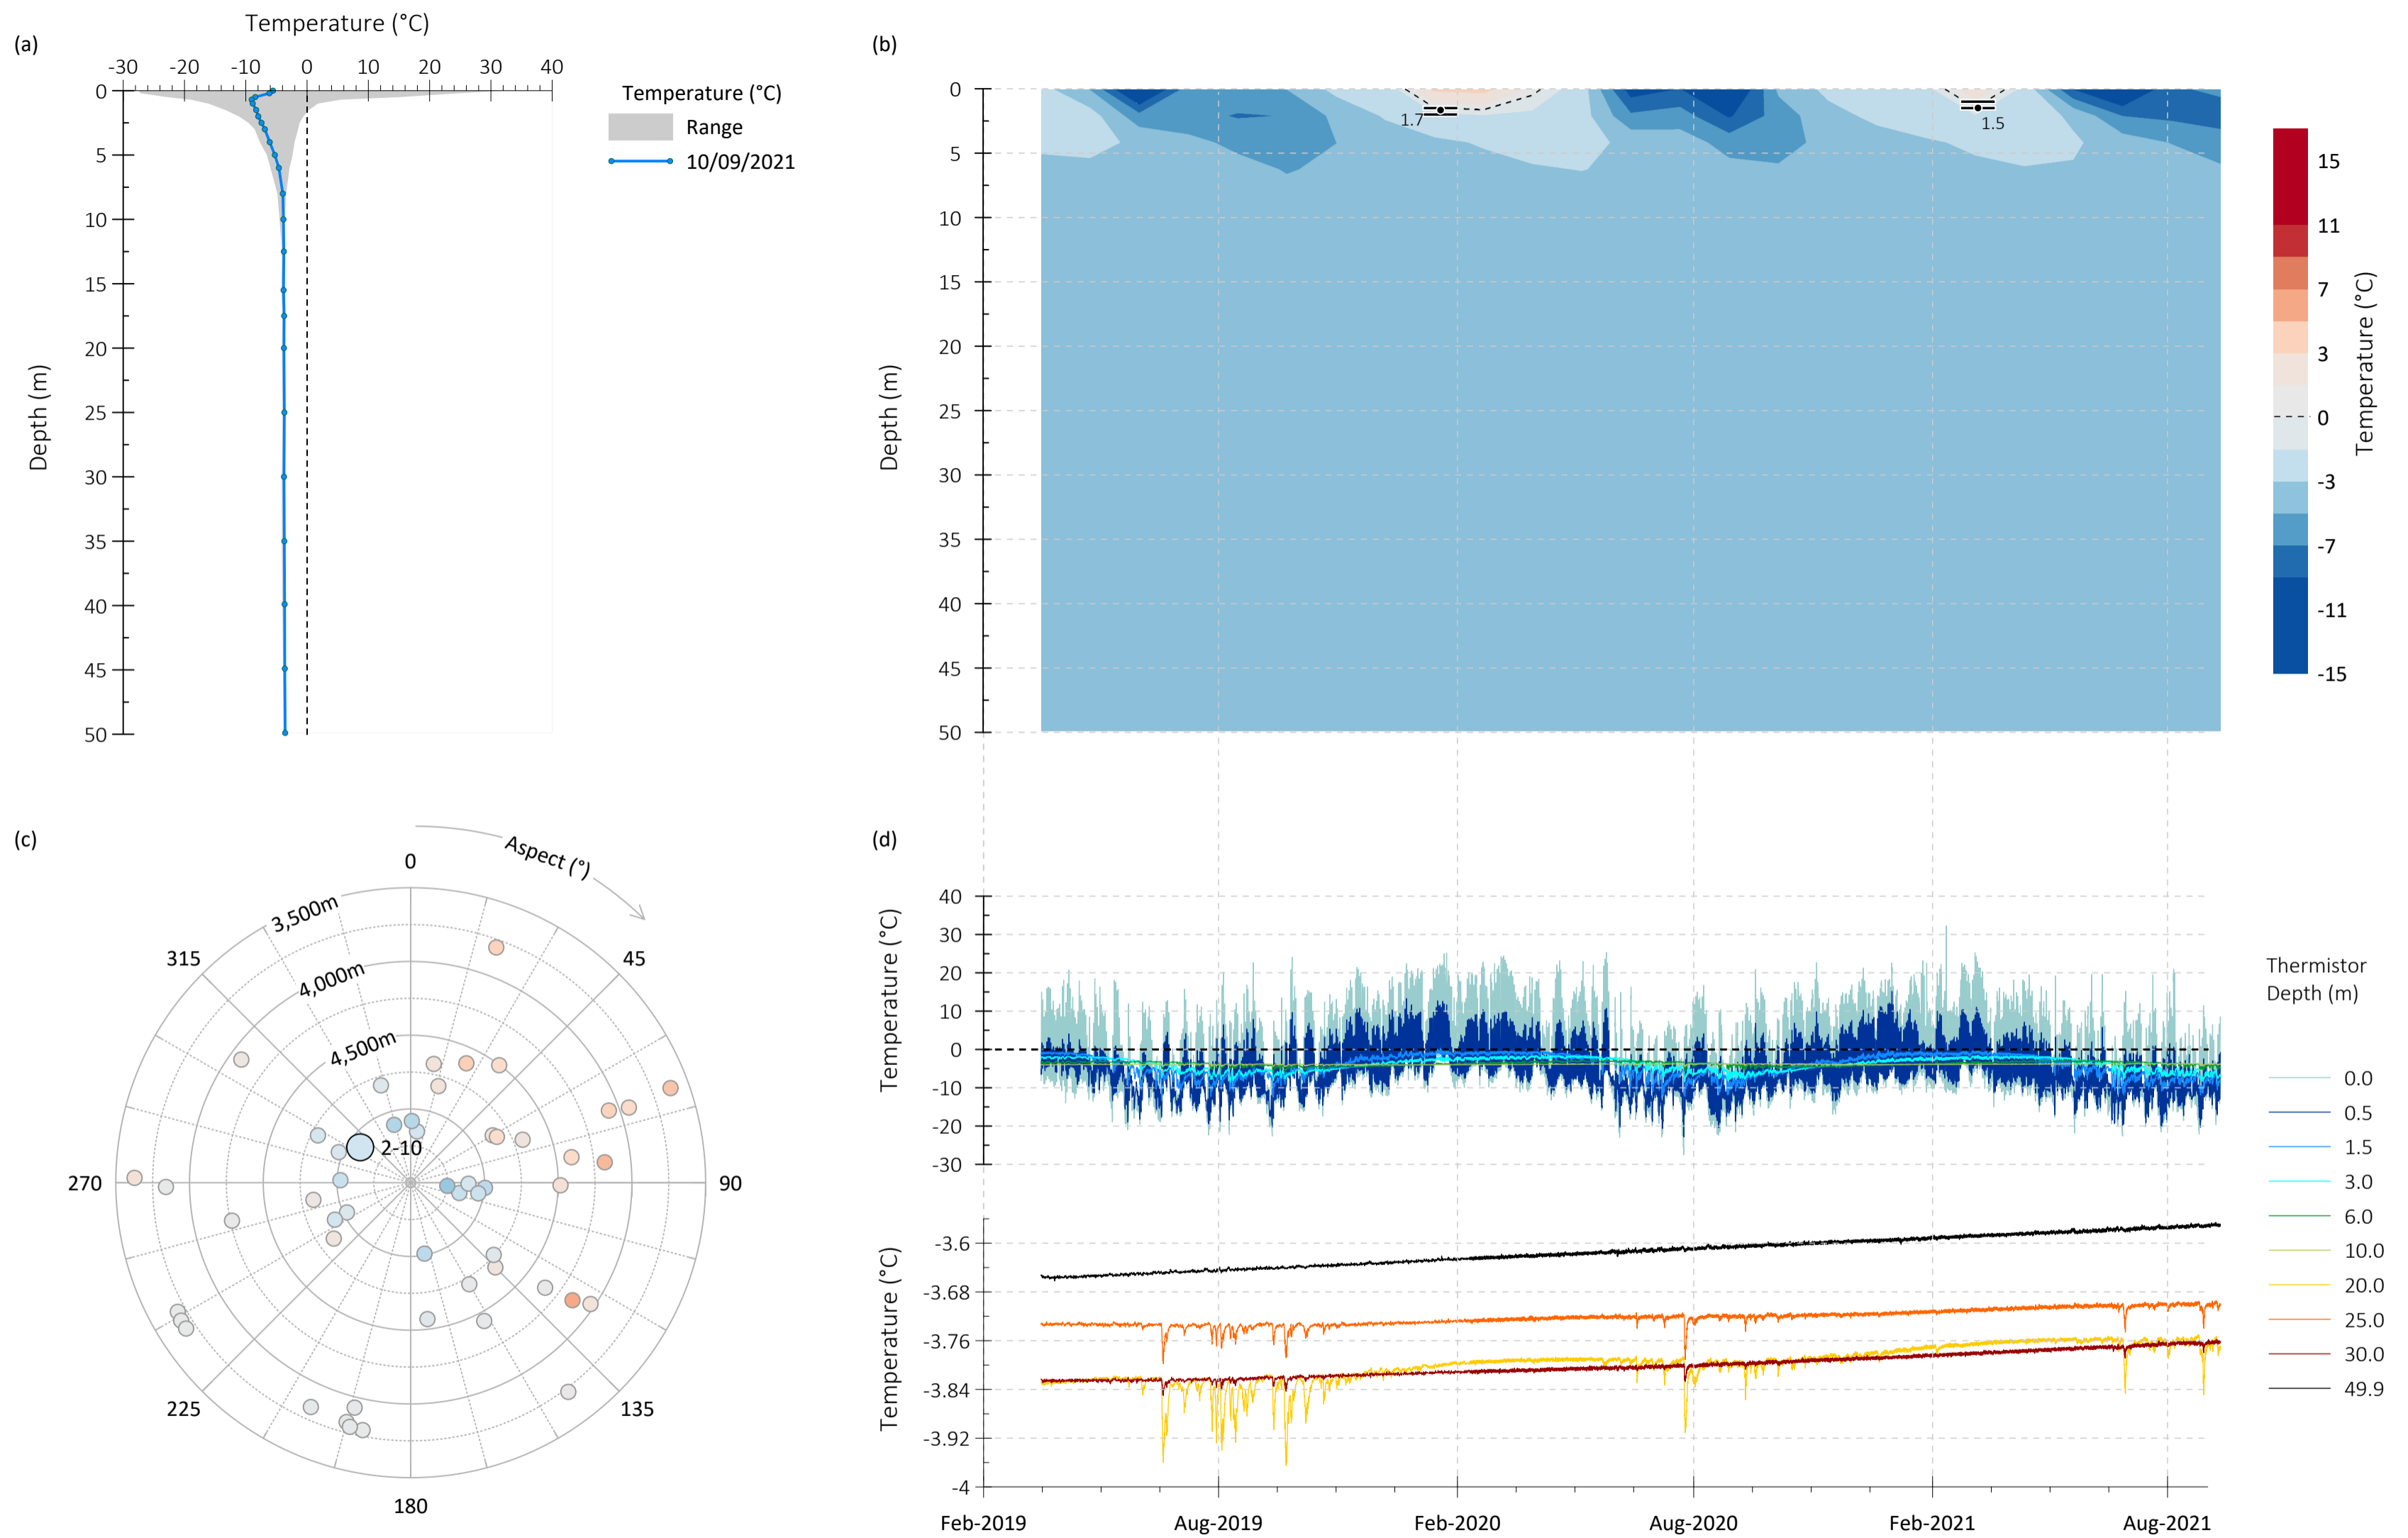

Figure S19: Ground thermal regime for Borehole 2-10 (El. = 5,082 m, Colluvium). Hourly measurements collected between 17/03/2019 and 10/09/2021.

- (a) Temperature depth profile. Range estimated using hourly raw data. Daily average of most recent available measurements shown in blue.  
 (b) Interpreted borehole temperature evolution with time. Contours estimated from hourly raw data. Active layer thickness indicated by black dots; horizontal lines indicate the depth of thermistors used for interpolation.  
 (c) Aspect-elevation-temperature diagram of most recent monthly temperatures below DZAA at all boreholes; colour scale same as plot (b). Borehole 2-10 ( $T = -3.77$  °C, depth=20 m) is indicated by enlarged symbol.  
 (d) Raw temperature time-series for selected depths at Borehole 2-10. Full dataset includes measurements from 24 sensors.

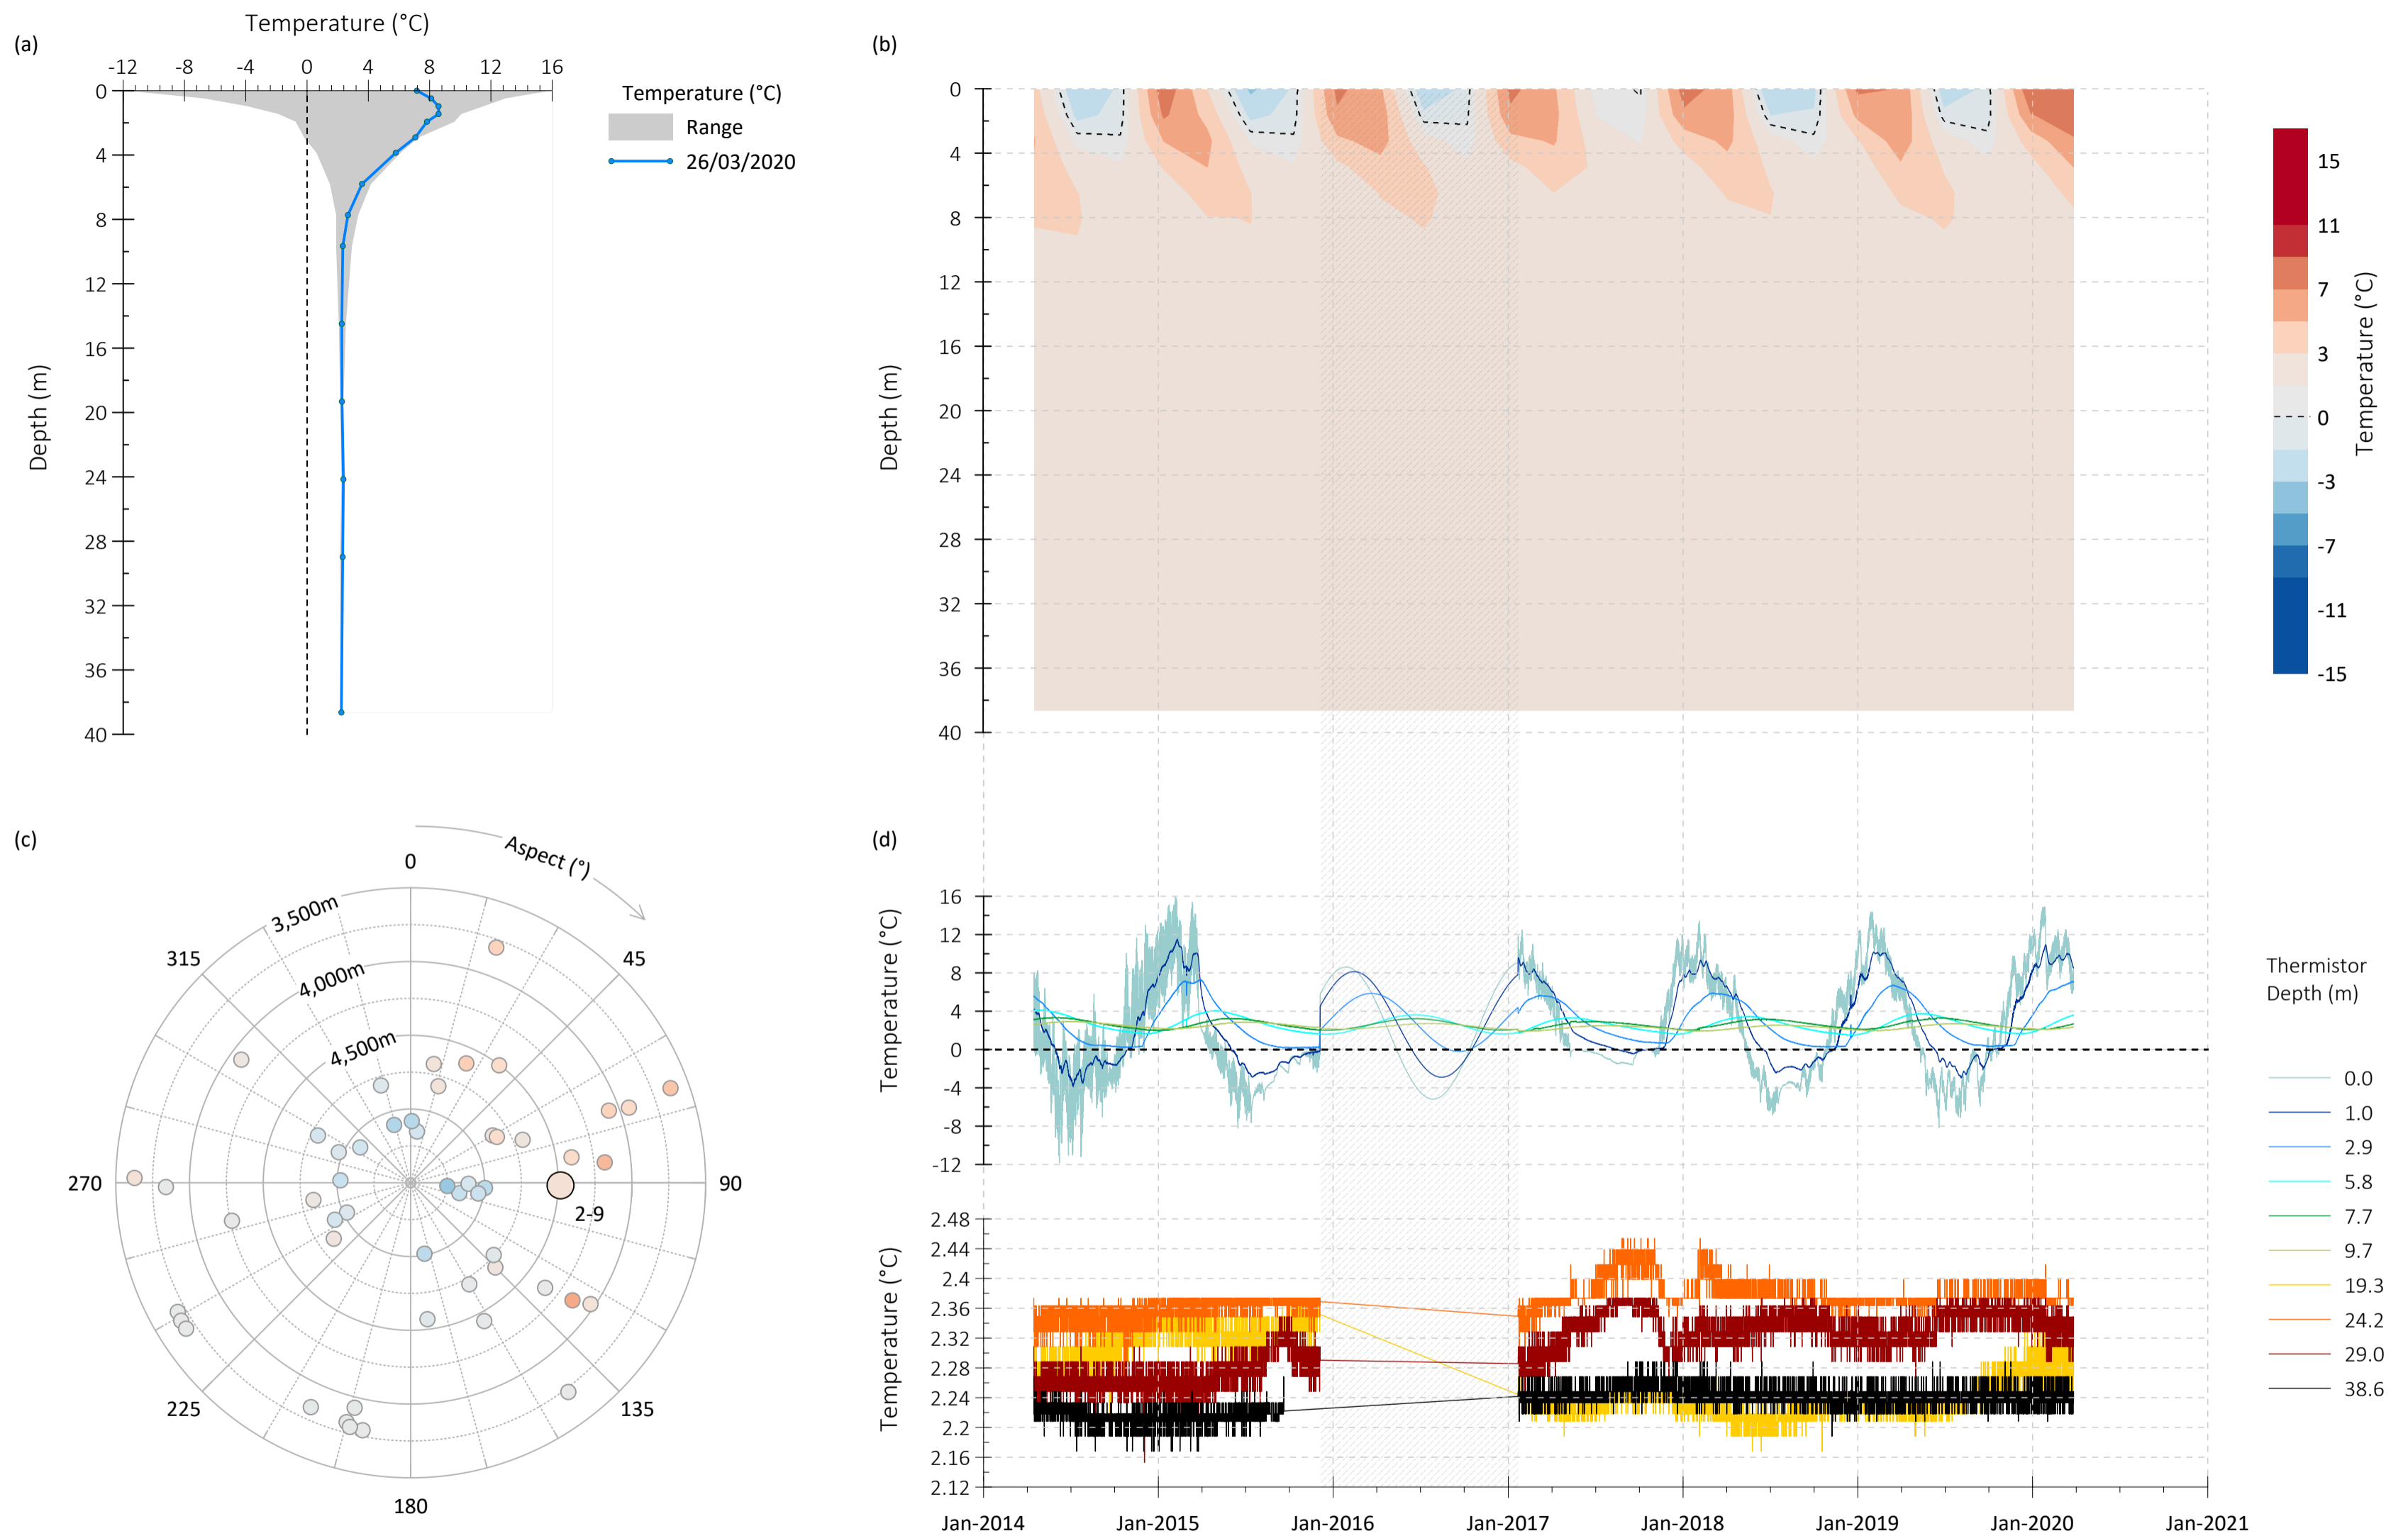

Figure S18: Ground thermal regime for Borehole 2-9 (El. = 4,484 m, Colluvium). Measurements collected approximately every 4 hours between 15/04/2014 and 26/03/2020. Interpolated data indicated by grey hatched areas. No data available at thermistor 1.9 m after 2017/01/21.

(a) Temperature depth profile. Range estimated using hourly raw data and interpolated values. Daily average of most recent available measurements shown in blue.

(b) Interpreted borehole temperature evolution with time. Contours estimated from hourly raw data and interpolated values.

(c) Aspect-elevation-temperature diagram of most recent monthly temperatures below DZAA at all boreholes; colour scale same as plot (b). Borehole 2-9 (T = 2.28°C, depth = 19.3 m) is indicated by enlarged symbol.

(d) Raw temperature time-series for selected depths at Borehole 2-9. Full dataset includes measurements from 15 sensors. Daily interpolated values are also shown.

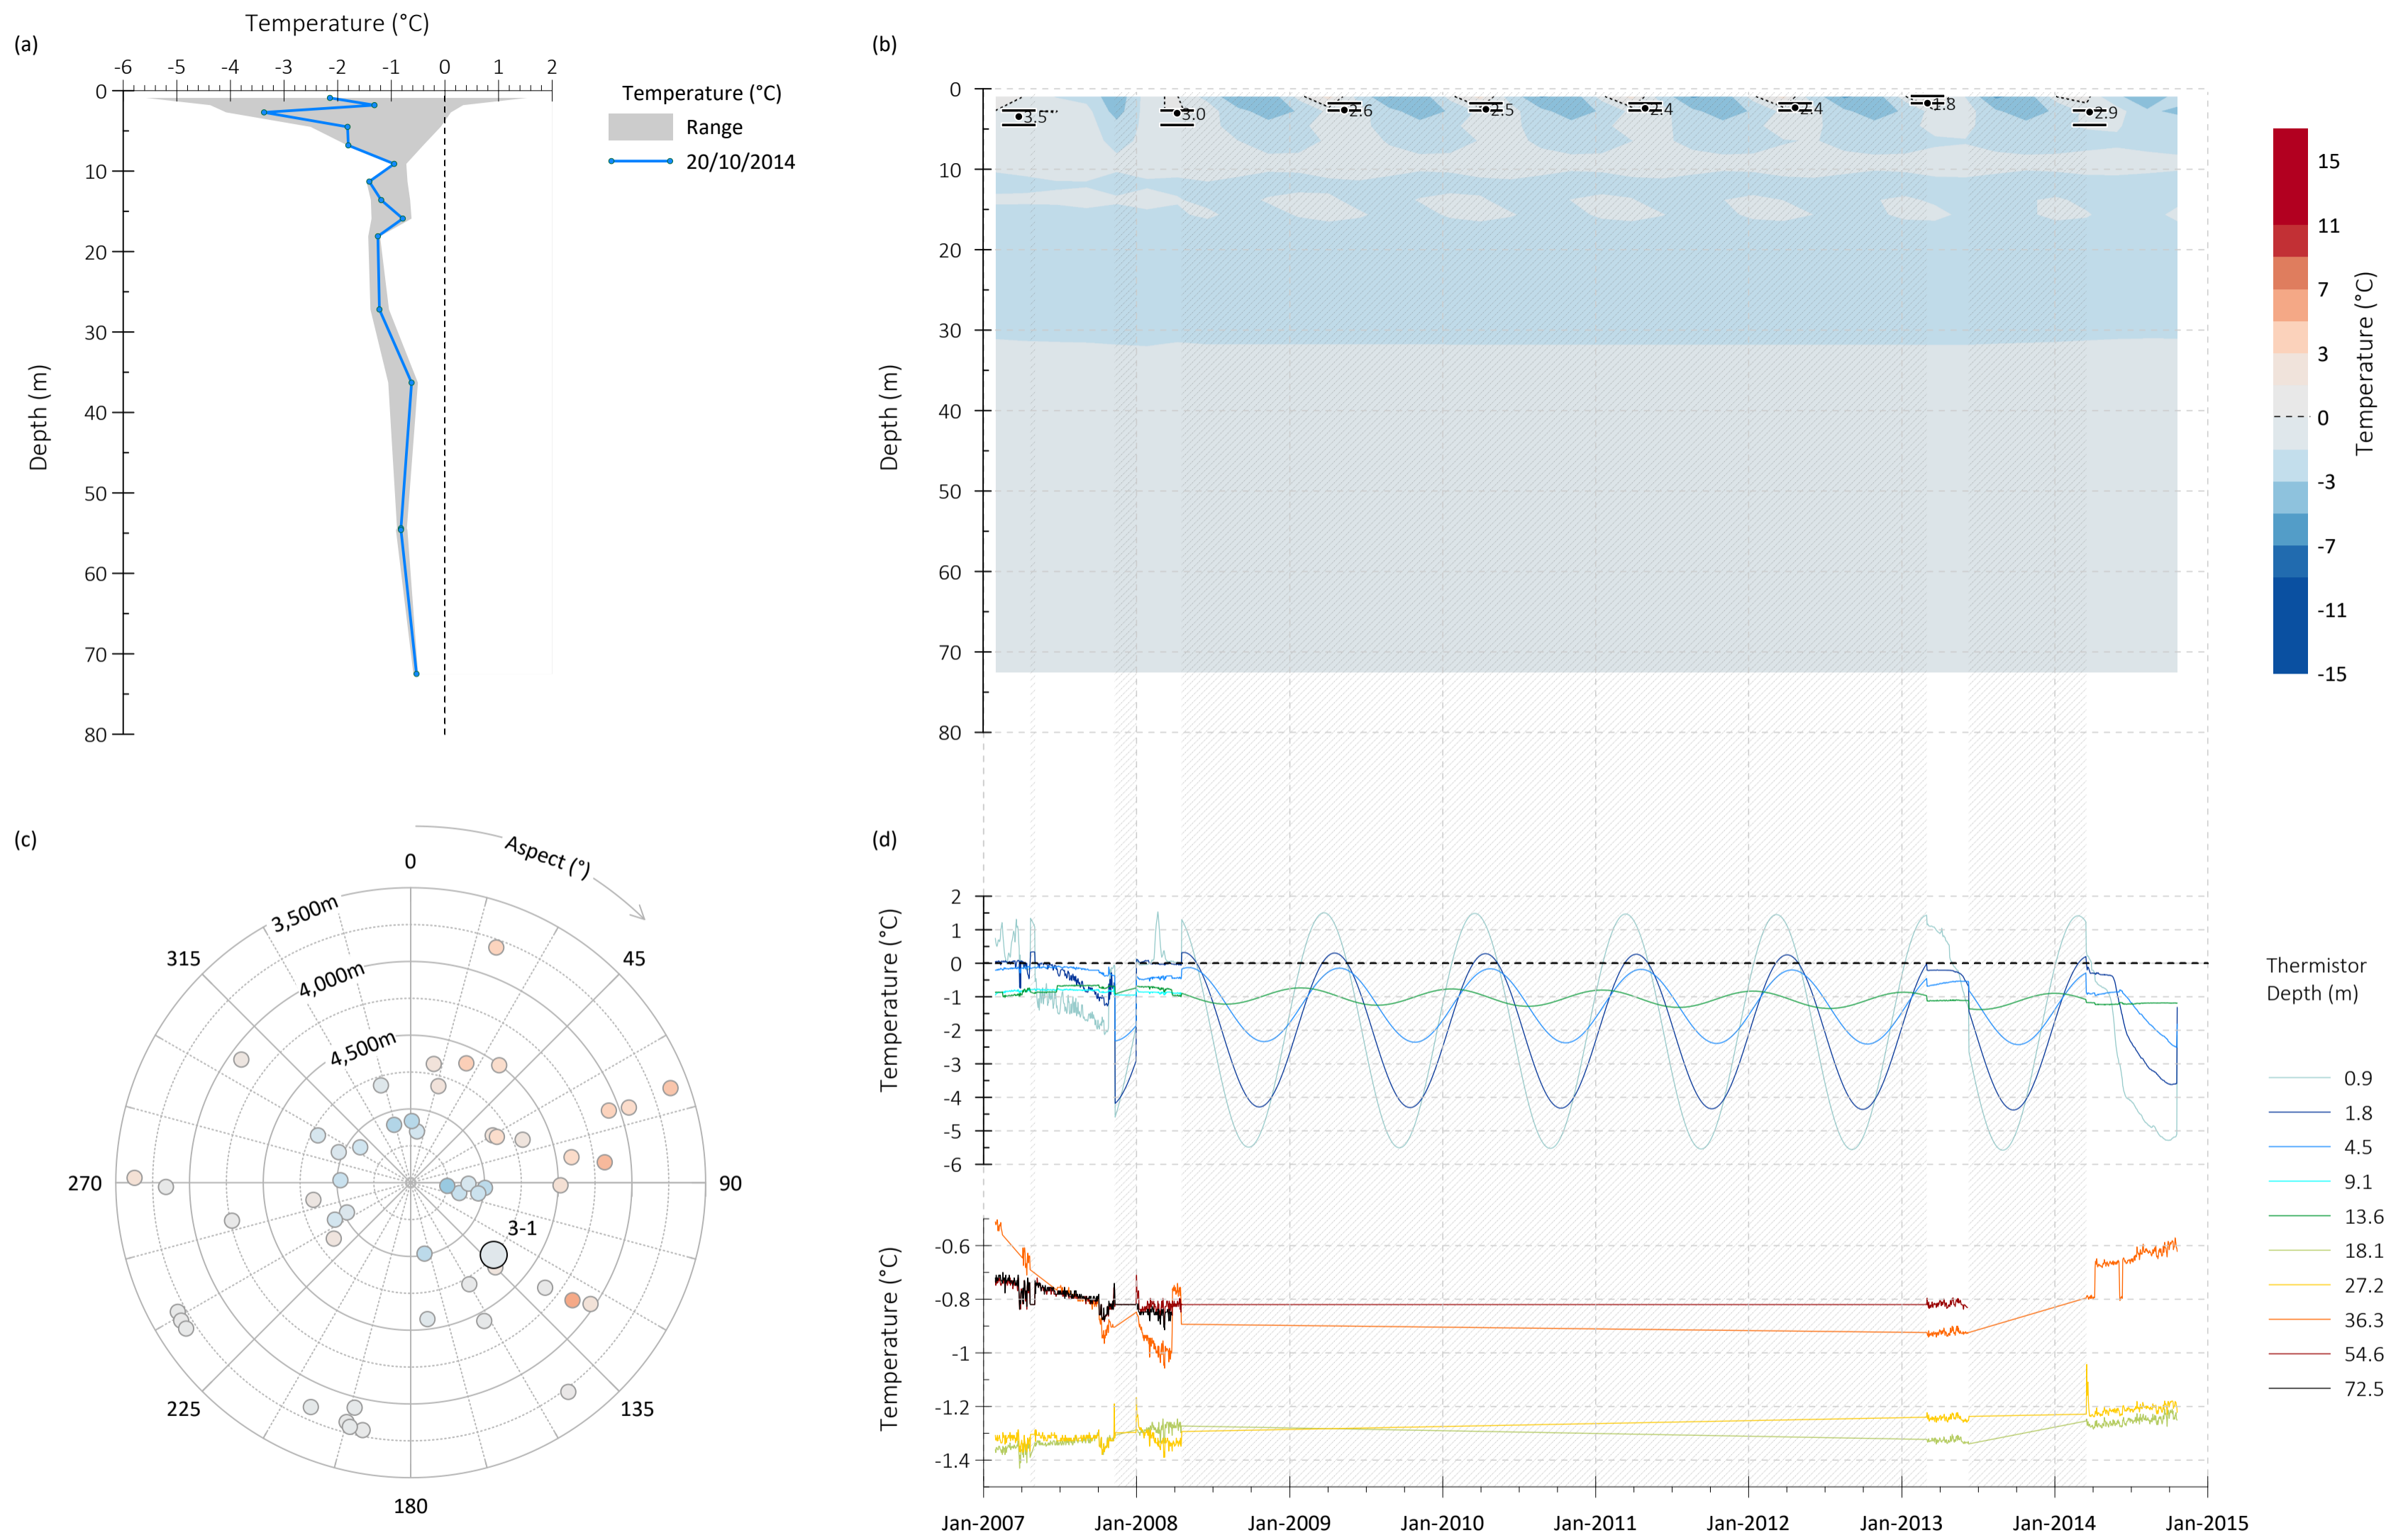

Figure S20: Ground thermal regime for Borehole 3-1 (El. = 4,754 m, Thin colluvium / weathered bedrock). Daily measurements collected between 27/01/2007 and 20/10/2014. Interpolated data indicated by grey hatched areas.

(a) Temperature depth profile. Range estimated using daily raw data and interpolated values. Most recent available measurement shown in blue.

(b) Interpreted borehole temperature evolution with time. Contours estimated from daily raw data and interpolated values. Active layer thickness indicated by black dots; horizontal lines indicate the depth of thermistors used for interpolation.

(c) Aspect-elevation-temperature diagram of most recent monthly temperatures below DZAA at all boreholes; colour scale same as plot (b). Borehole 3-1 ( $T = -1.25$  °C, depth = 18.1 m) is indicated by enlarged symbol.

(d) Raw temperature time-series for selected depths at Borehole 3-1. Full dataset includes measurements from 15 sensors. Daily interpolated values are also shown.



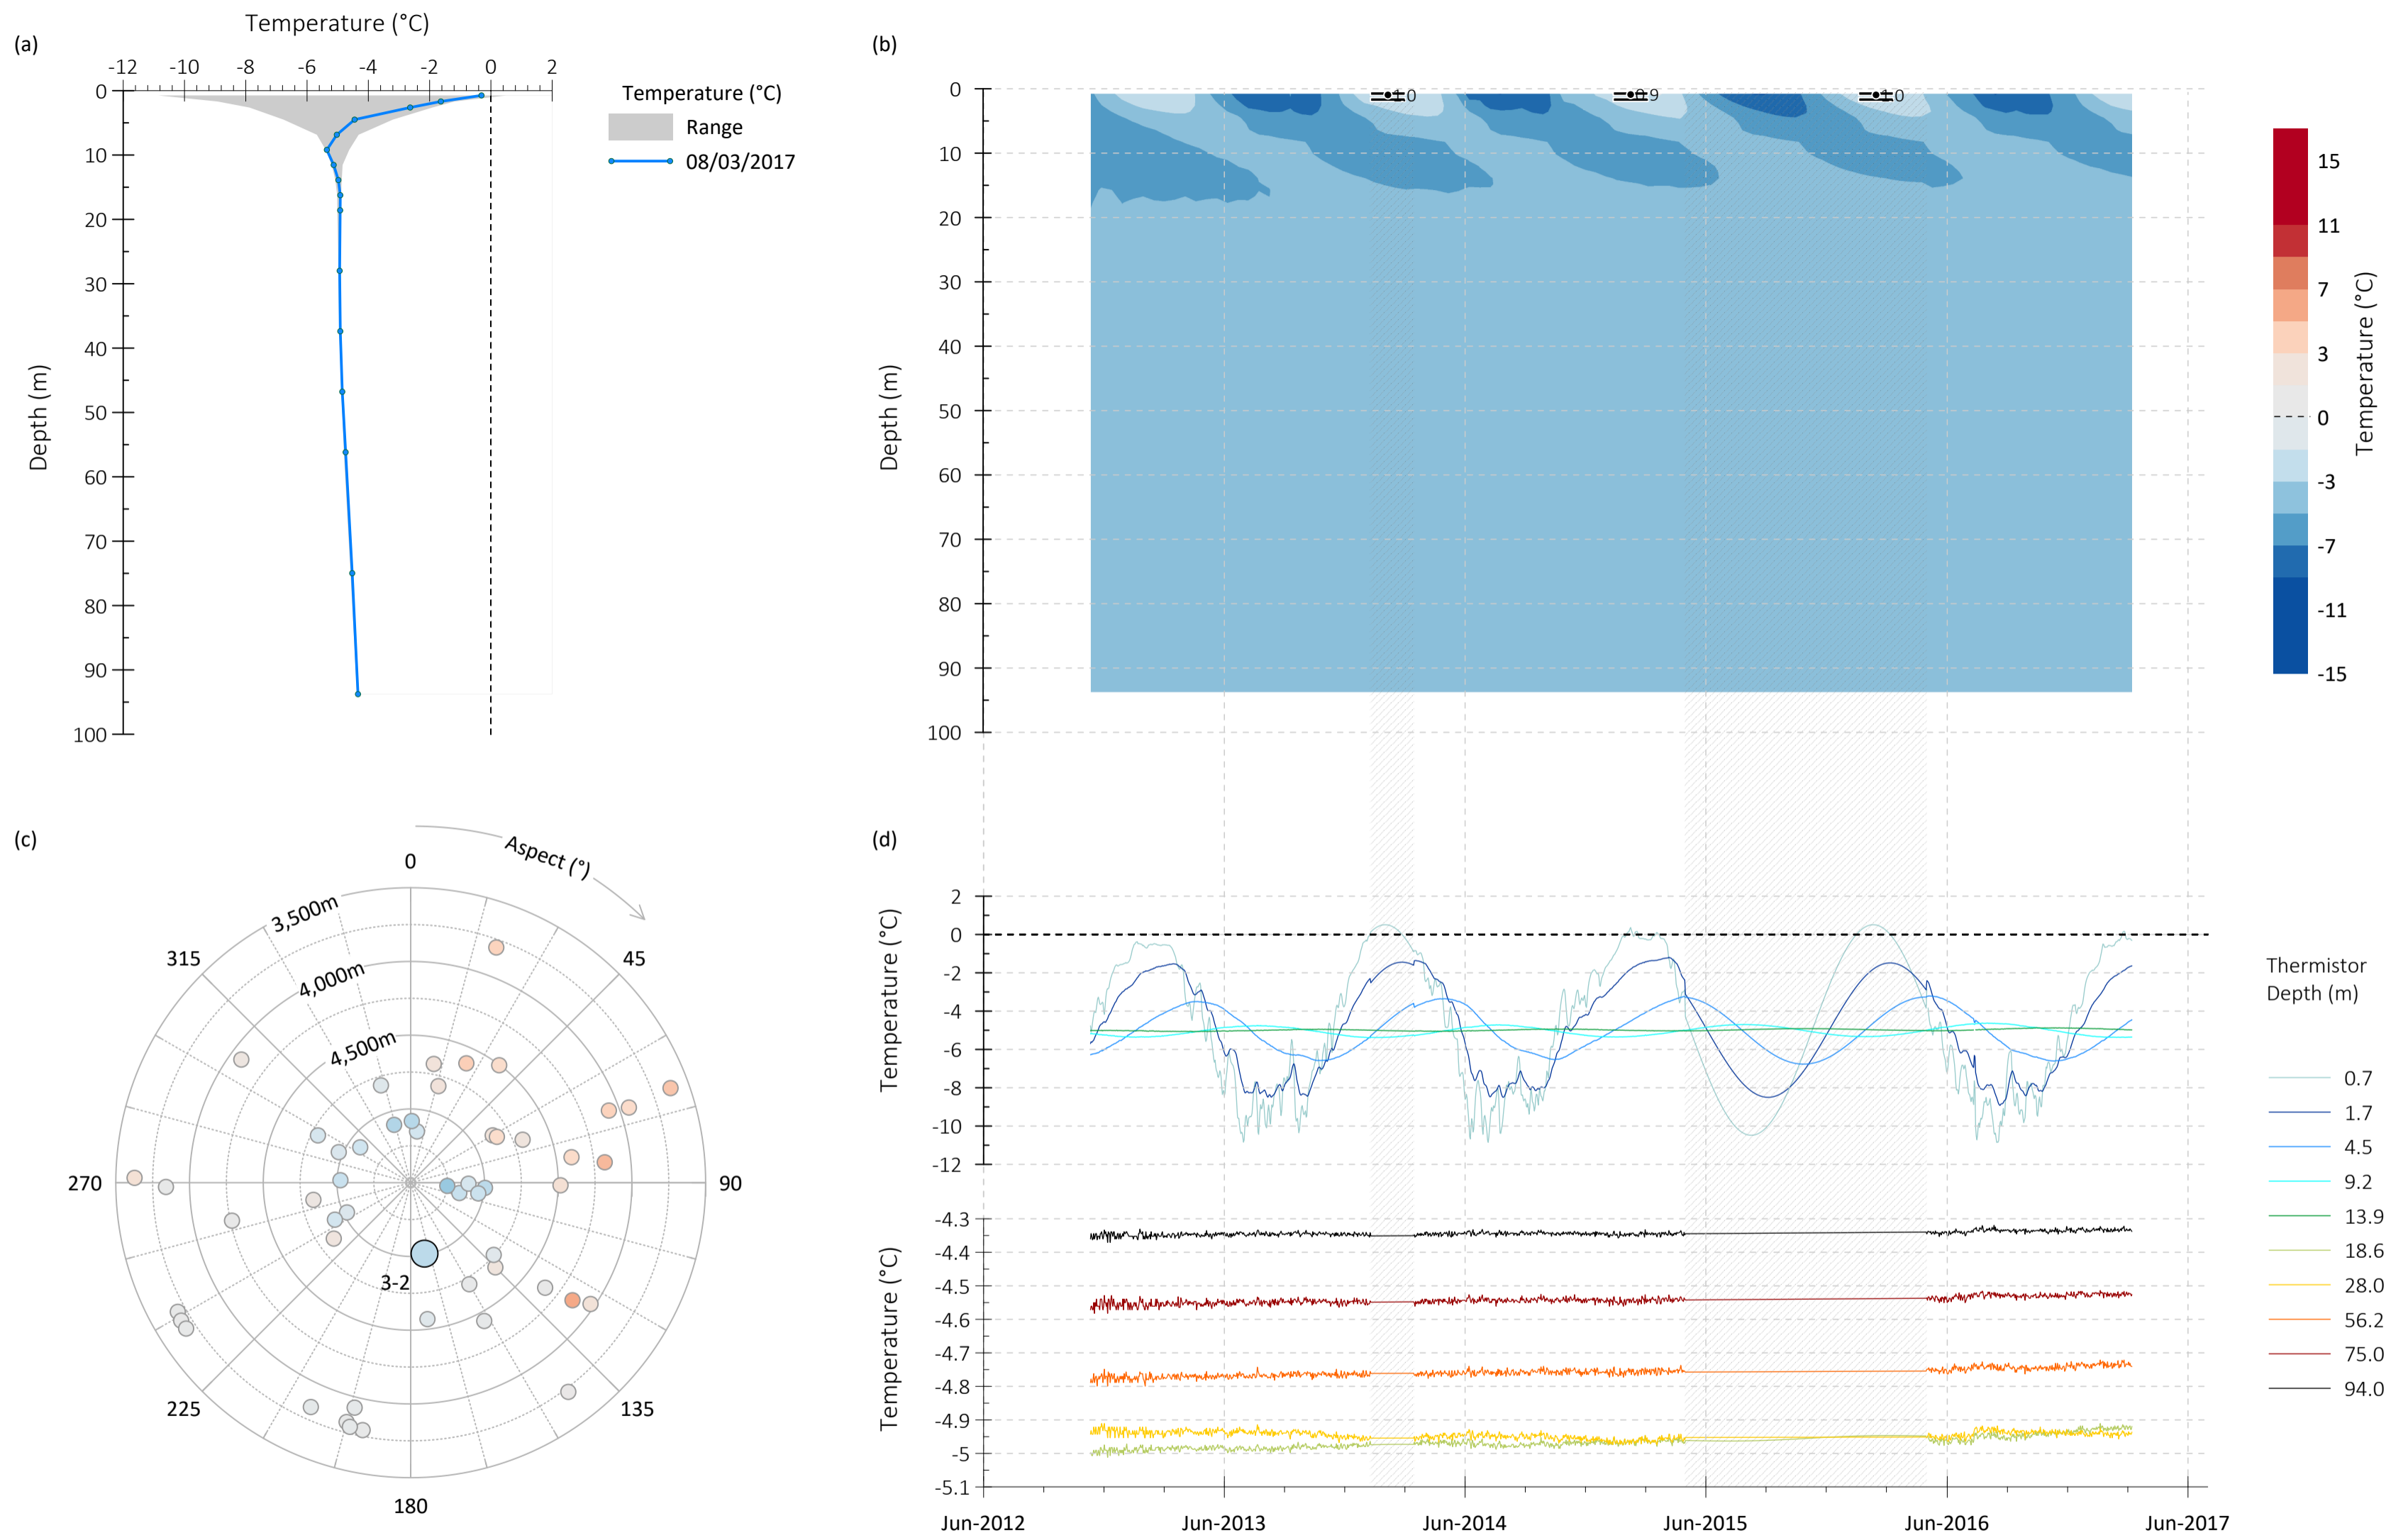

Figure S21: Ground thermal regime for Borehole 3-2 (El. = 5,010 m, Bedrock). Daily measurements collected between 10/11/2012 and 08/03/2017. Interpolated data indicated by grey hatched areas.

(a) Temperature depth profile. Range estimated using daily raw data and interpolated values. Most recent available measurement shown in blue.

(b) Interpreted borehole temperature evolution with time. Contours estimated from daily raw data and interpolated values. Active layer thickness indicated by black dots; horizontal lines indicate the depth of thermistors used for interpolation.

(c) Aspect-elevation-temperature diagram of most recent monthly temperatures below DZAA at all boreholes; colour scale same as plot (b). Borehole 3-2 ( $T = -4.92$  °C, depth=18.6 m) is indicated by enlarged symbol.

(d) Raw temperature time-series for selected depths at Borehole 3-2. Full dataset includes measurements from 16 sensors. Daily interpolated values are also shown.

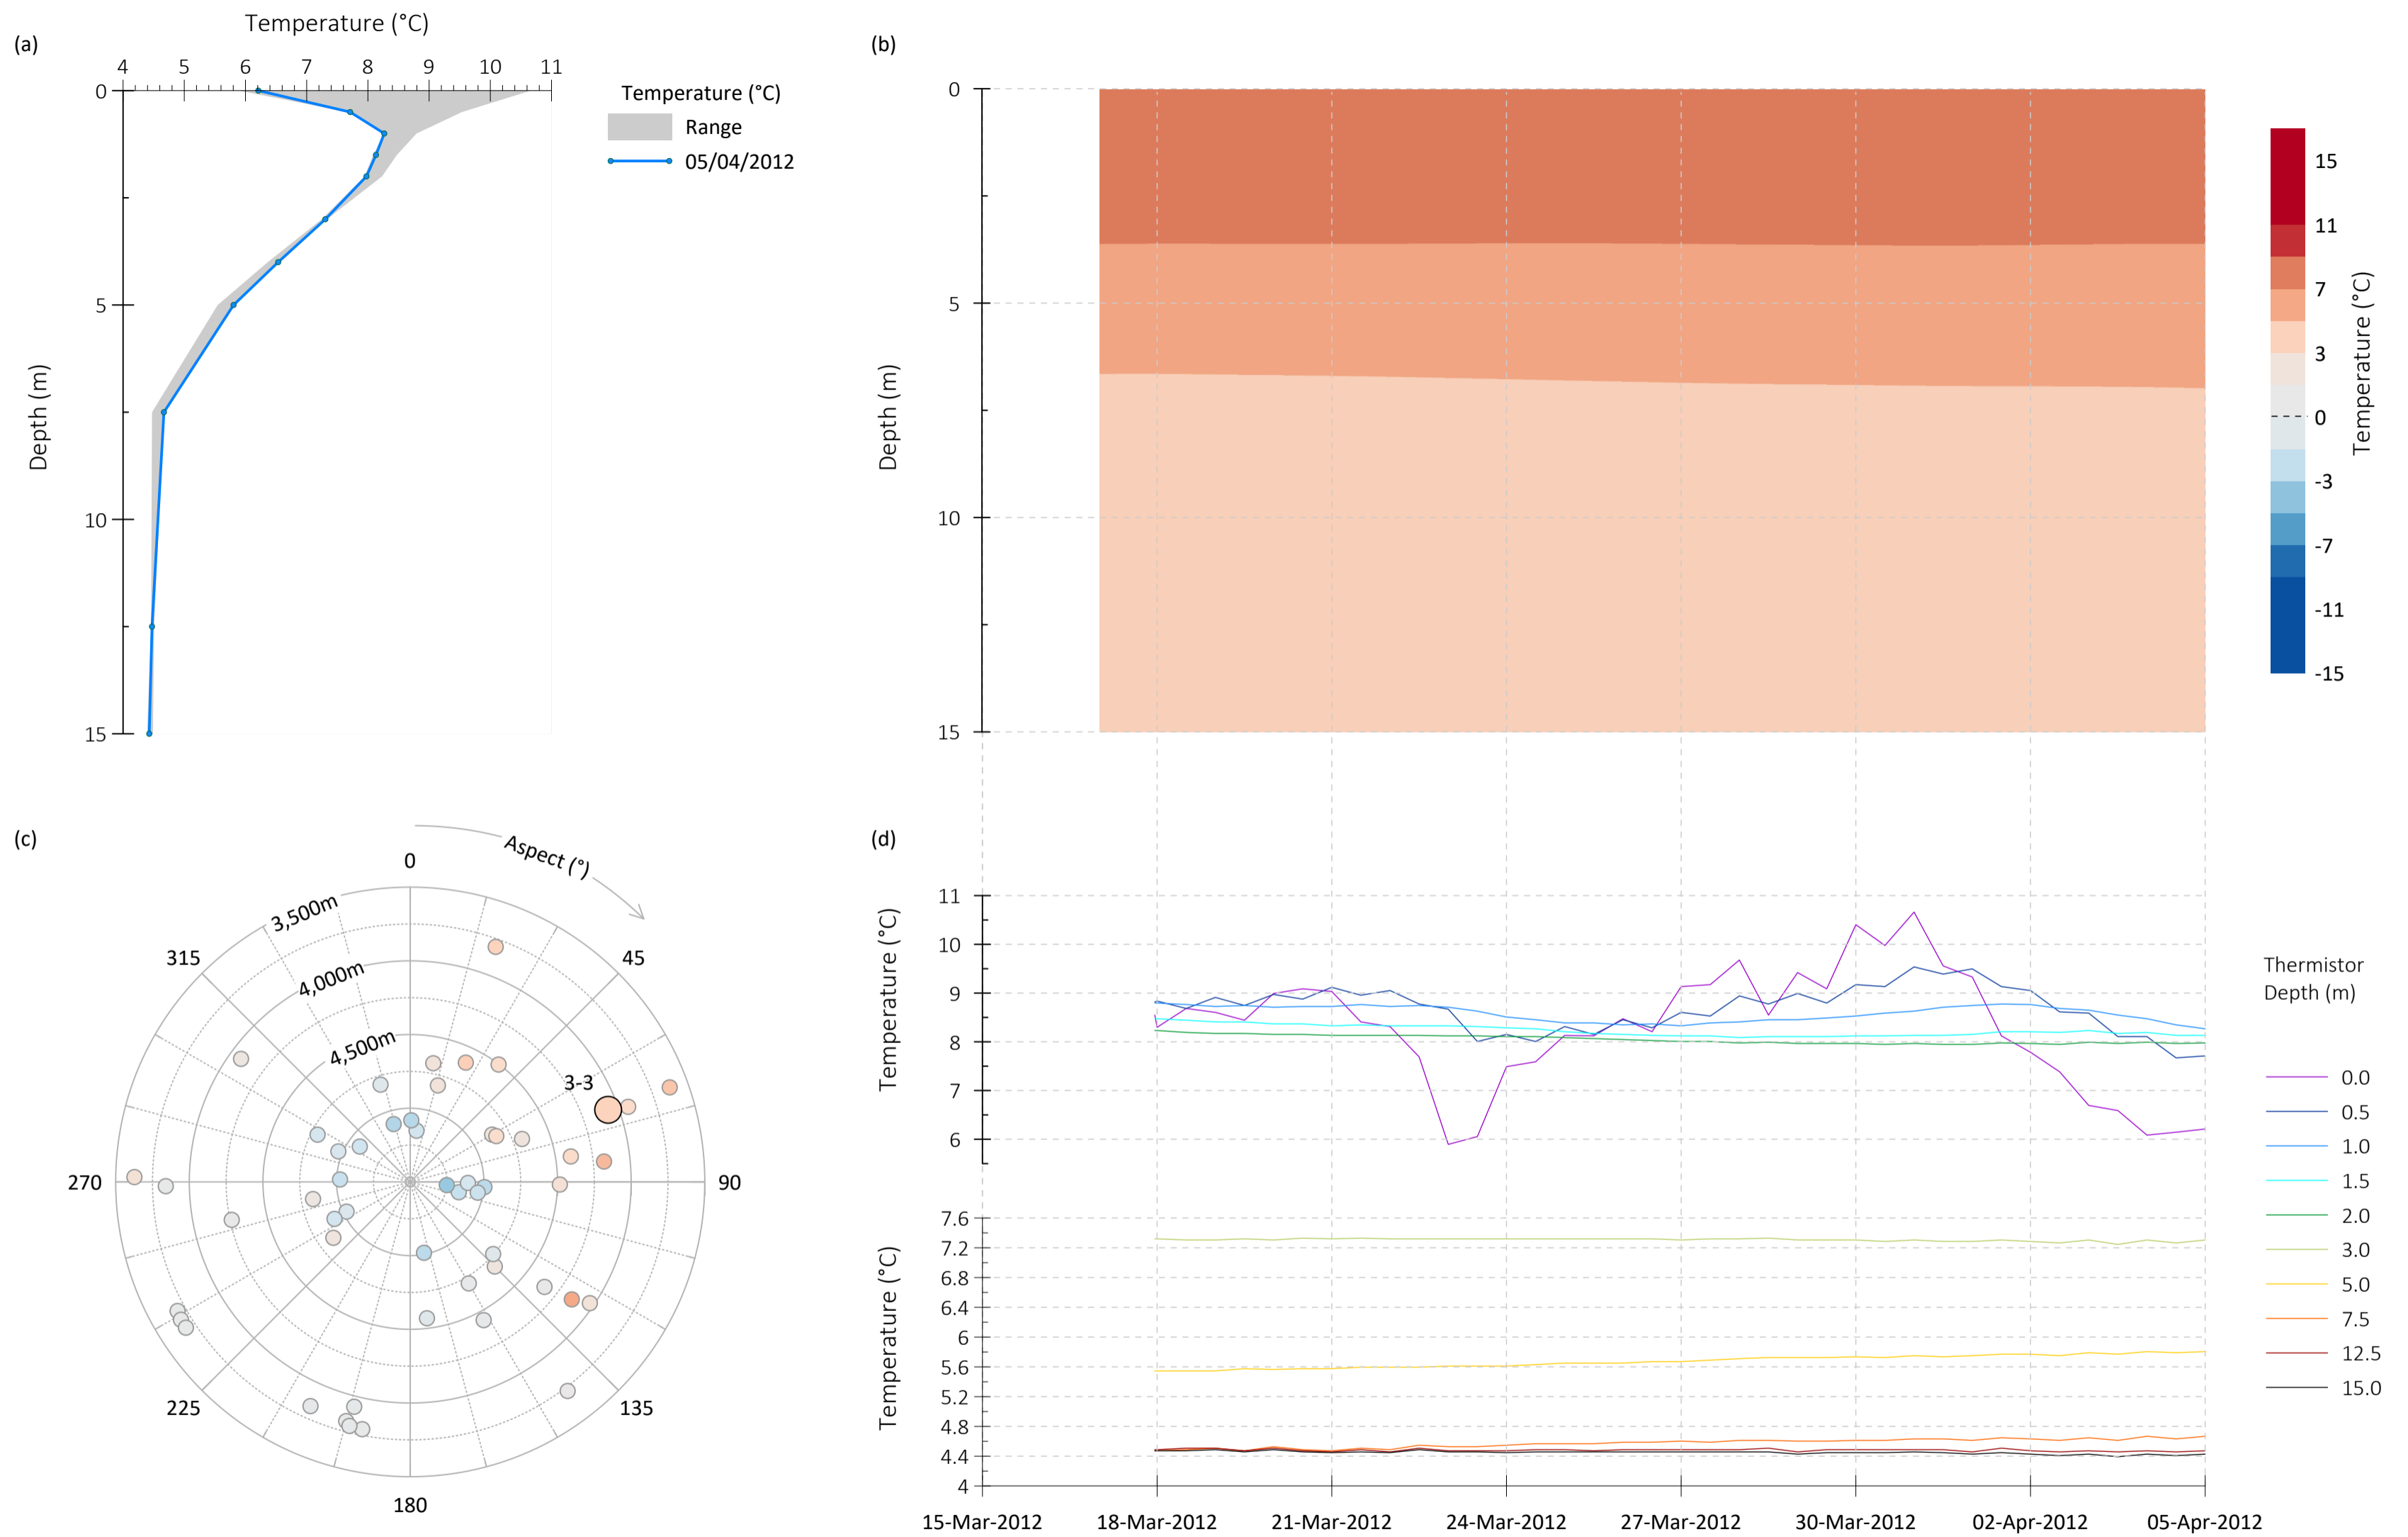

Figure S22: Ground thermal regime for Borehole 3-3 (El. = 4,070 m, Colluvium). Measurements collected approximately every 12 hours between 17/03/2012 and 05/04/2012.

(a) Temperature depth profile. Range estimated using hourly raw data. Daily average of most recent available measurements shown in blue.

(b) Interpreted borehole temperature evolution with time. Contours estimated from hourly raw data.

(c) Aspect-elevation-temperature diagram of most recent monthly temperatures below DZAA at all boreholes; colour scale same as plot (b). Borehole 3-3 ( $T = 4.42\text{ }^{\circ}\text{C}$ , depth=15 m) is indicated by enlarged symbol.

(d) Raw temperature time-series for selected depths at Borehole 3-3. Full dataset includes measurements from 11 sensors.

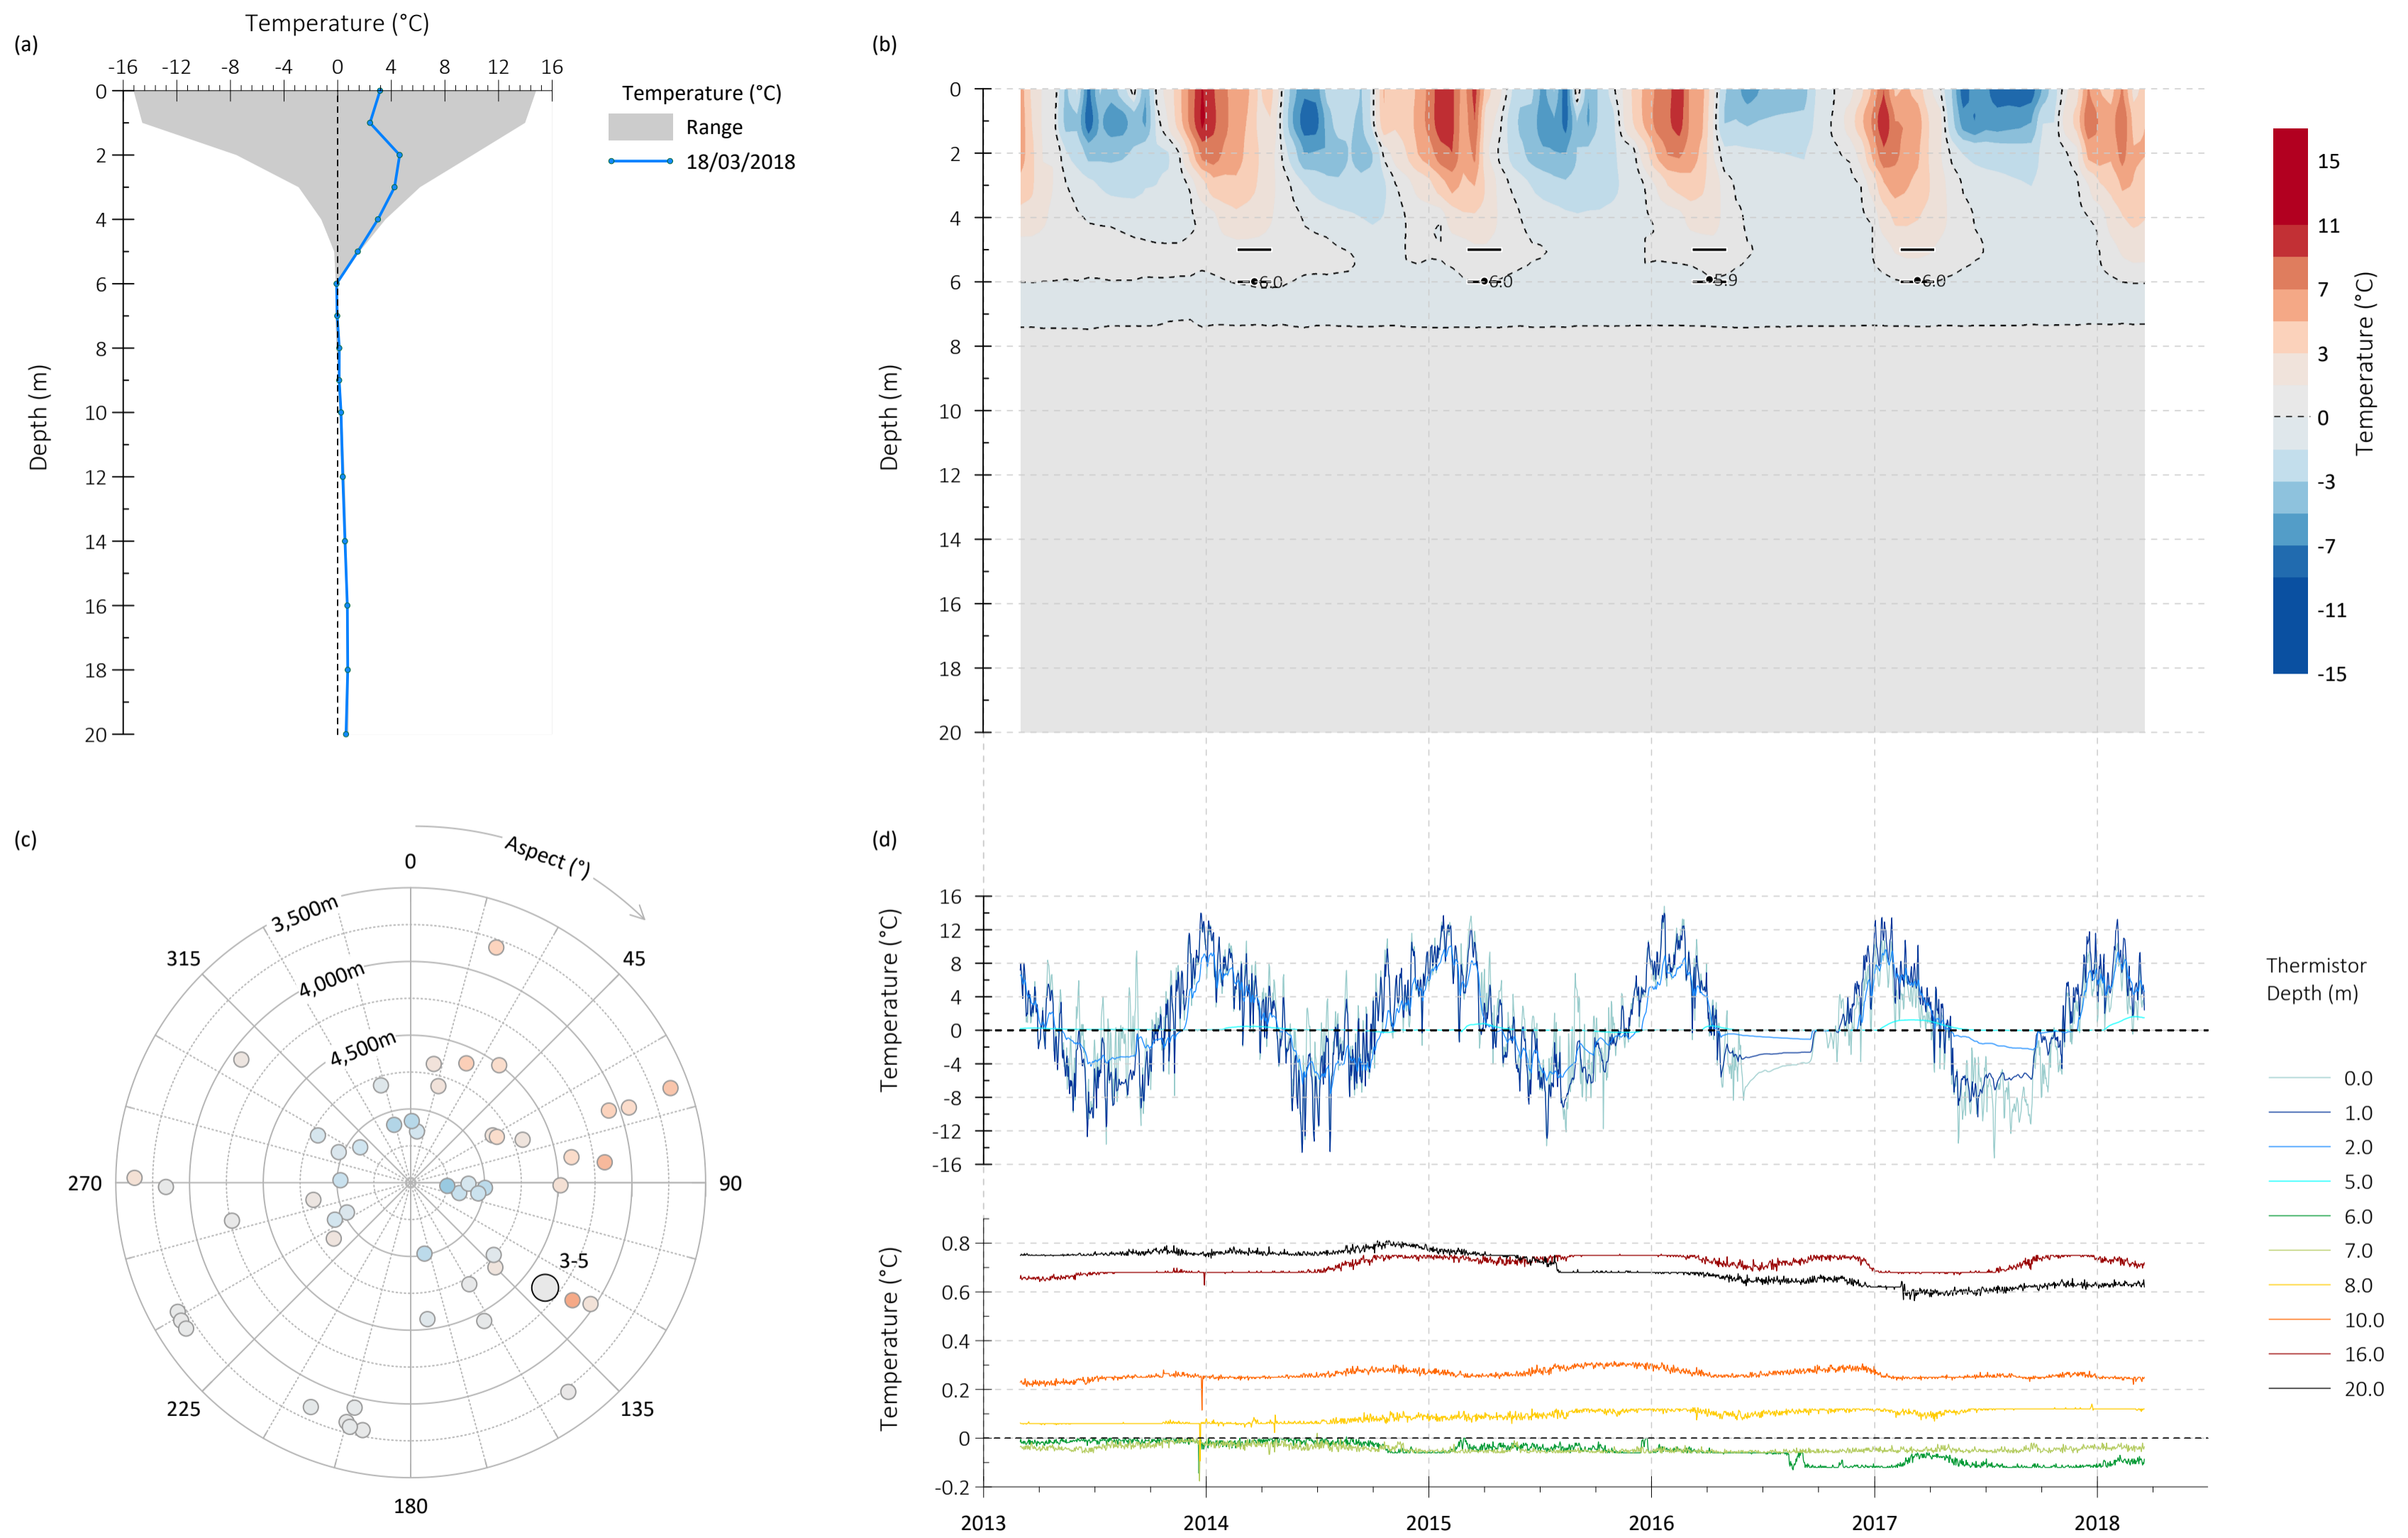

Figure S23: Ground thermal regime for Borehole 3-5 (El. = 4,343 m, Colluvium). Daily measurements collected between 02/03/2013 and 18/03/2018.

(a) Temperature depth profile. Range estimated using daily raw data. Most recent available measurement shown in blue.

(b) Interpreted borehole temperature evolution with time. Contours estimated from daily raw data. Active layer thickness indicated by black dots; horizontal lines indicate the depth of thermistors used for interpolation.

(c) Aspect-elevation-temperature diagram of most recent monthly temperatures below DZAA at all boreholes; colour scale same as plot (b). Borehole 3-5 ( $T = -0.04$  °C, depth = 7 m) is indicated by enlarged symbol.

(d) Raw temperature time-series for selected depths at Borehole 3-5. Full dataset includes measurements from 16 sensors.

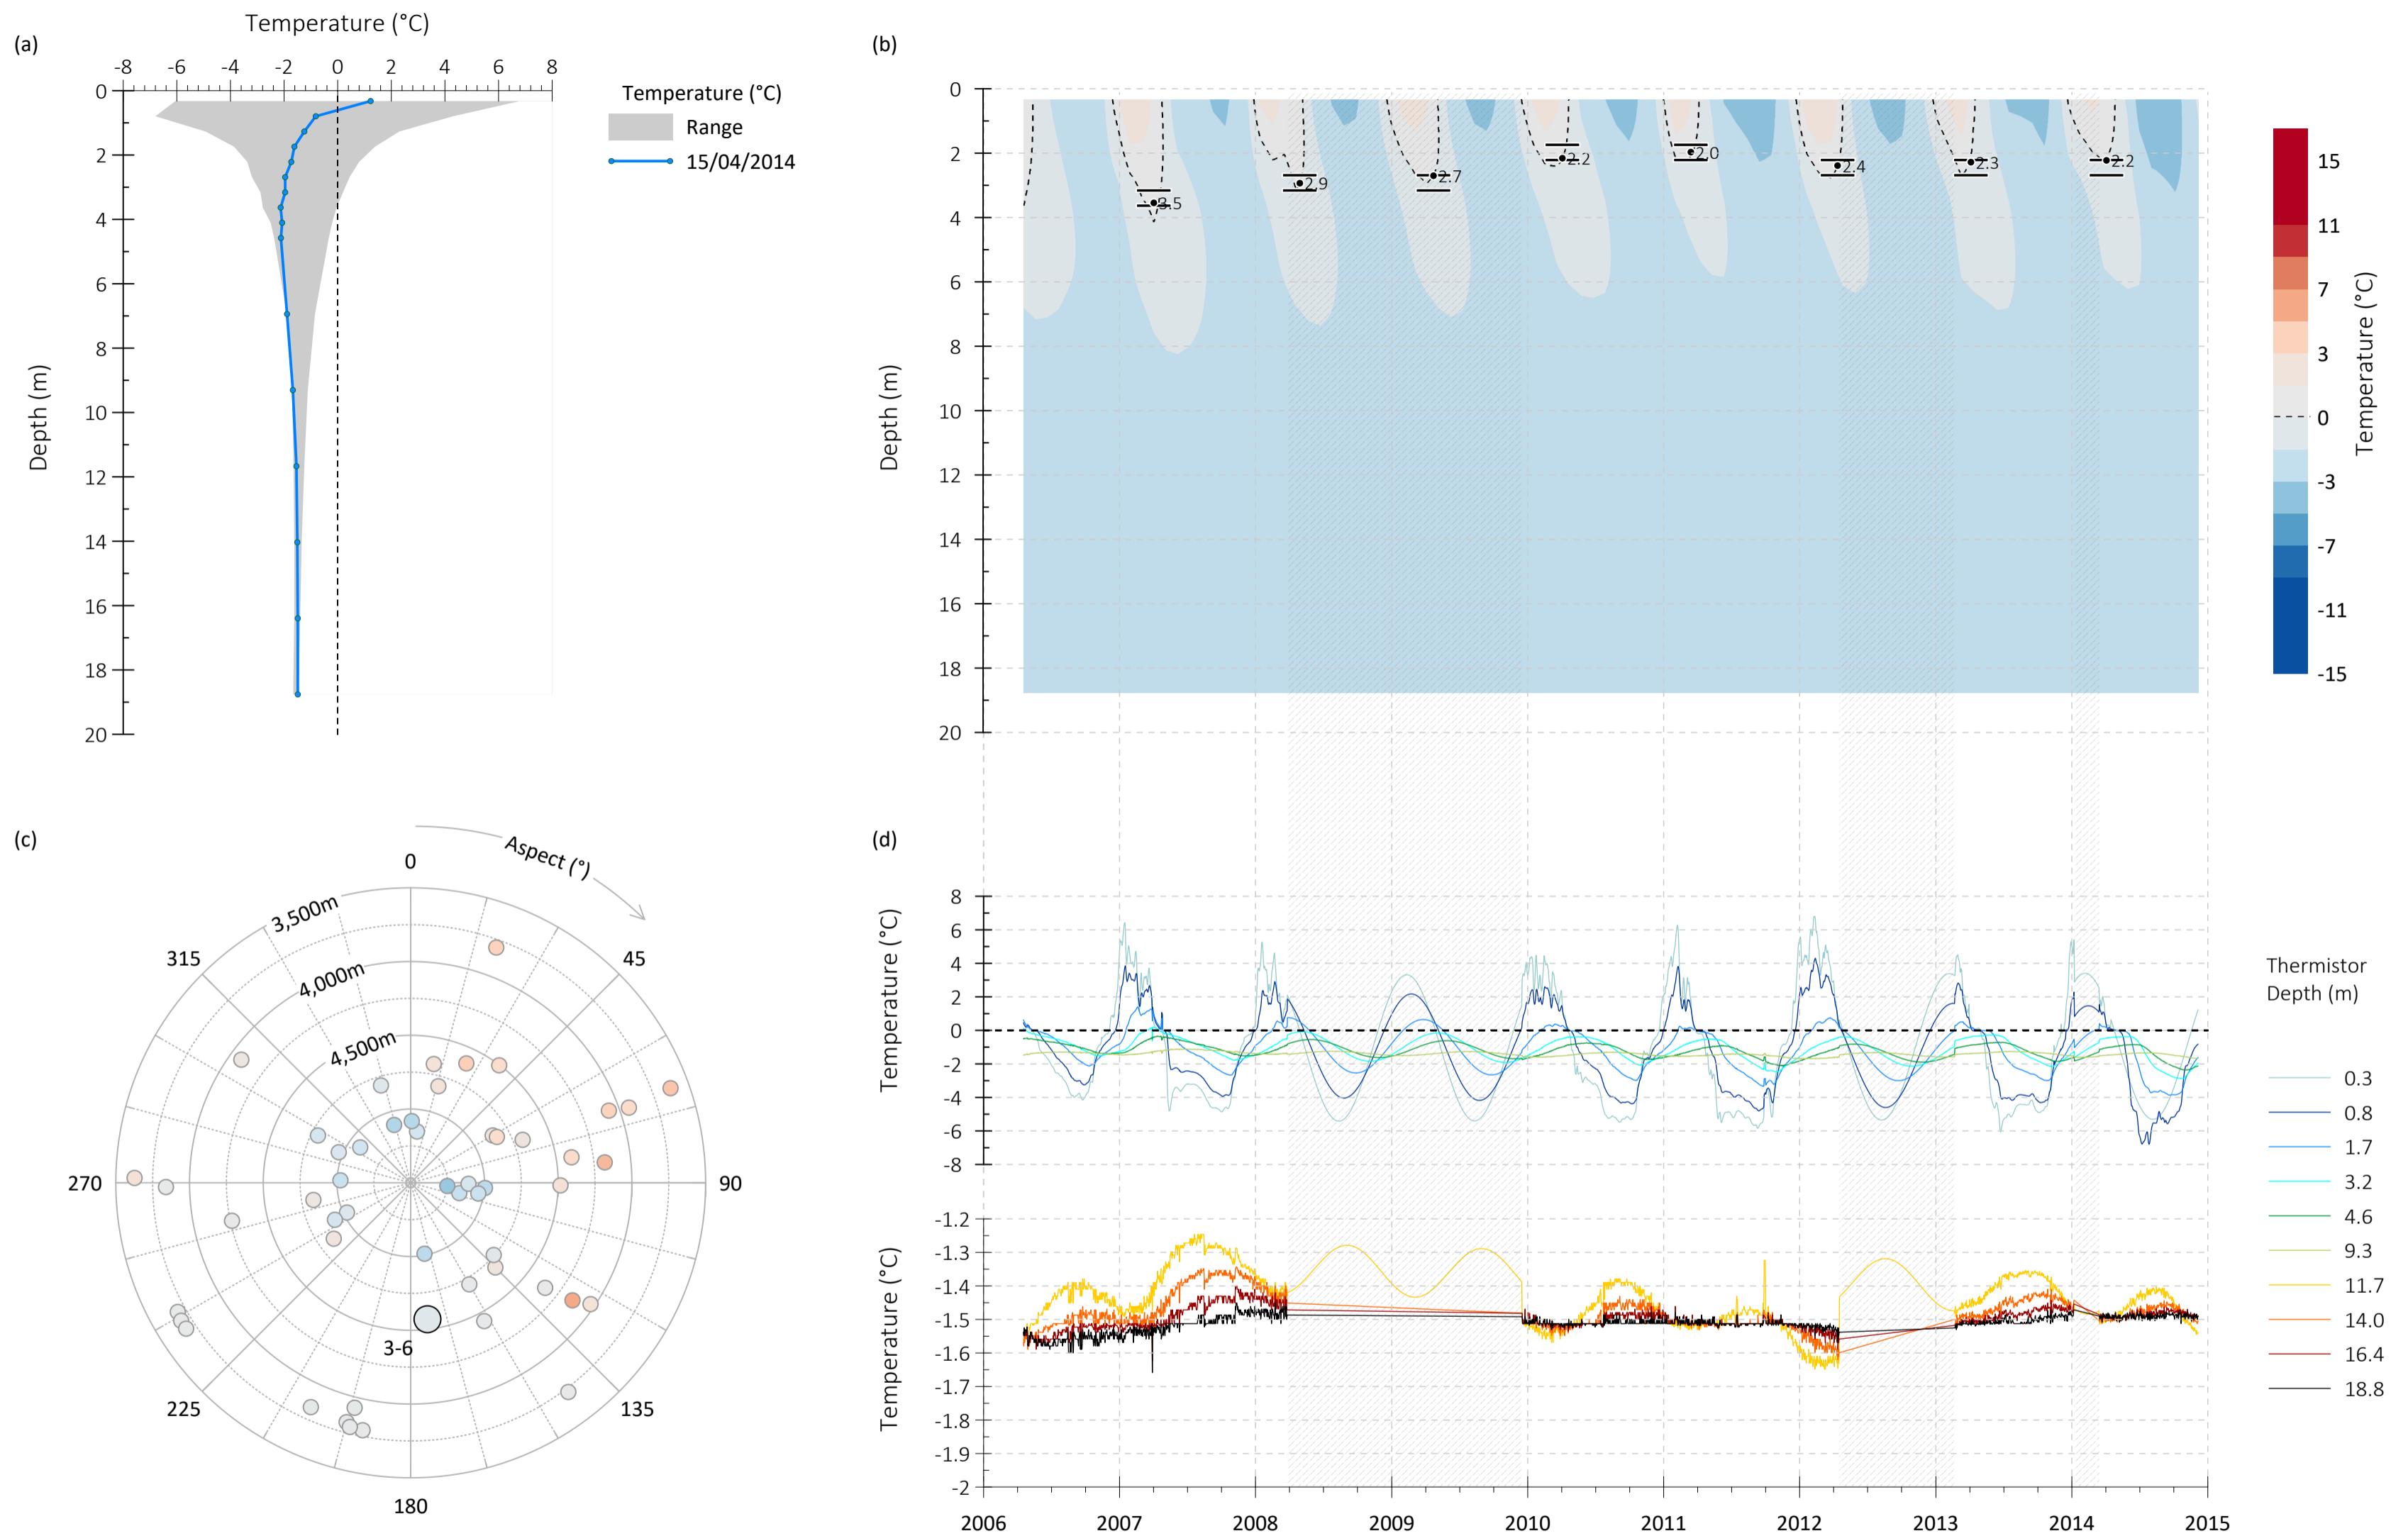

Figure S24: Ground thermal regime for Borehole 3-6 (El. = 4,568 m, Colluvium). Daily measurements collected between 18/04/2006 and 15/04/2014. Interpolated data indicated by grey hatched areas.

(a) Temperature depth profile. Range estimated using daily raw data and interpolated values. Most recent available measurement shown in blue.

(b) Interpreted borehole temperature evolution with time. Contours estimated from daily raw data and interpolated values. Active layer thickness indicated by black dots; horizontal lines indicate the depth of thermistors used for interpolation.

(c) Aspect-elevation-temperature diagram of most recent monthly temperatures below DZAA at all boreholes; colour scale same as plot (b). Borehole 3-6 ( $T = -1.49$  °C, depth=18.8 m) is indicated by enlarged symbol.

(d) Raw temperature time-series for selected depths at Borehole 3-6. Full dataset includes measurements from 16 sensors. Daily interpolated values are also shown.

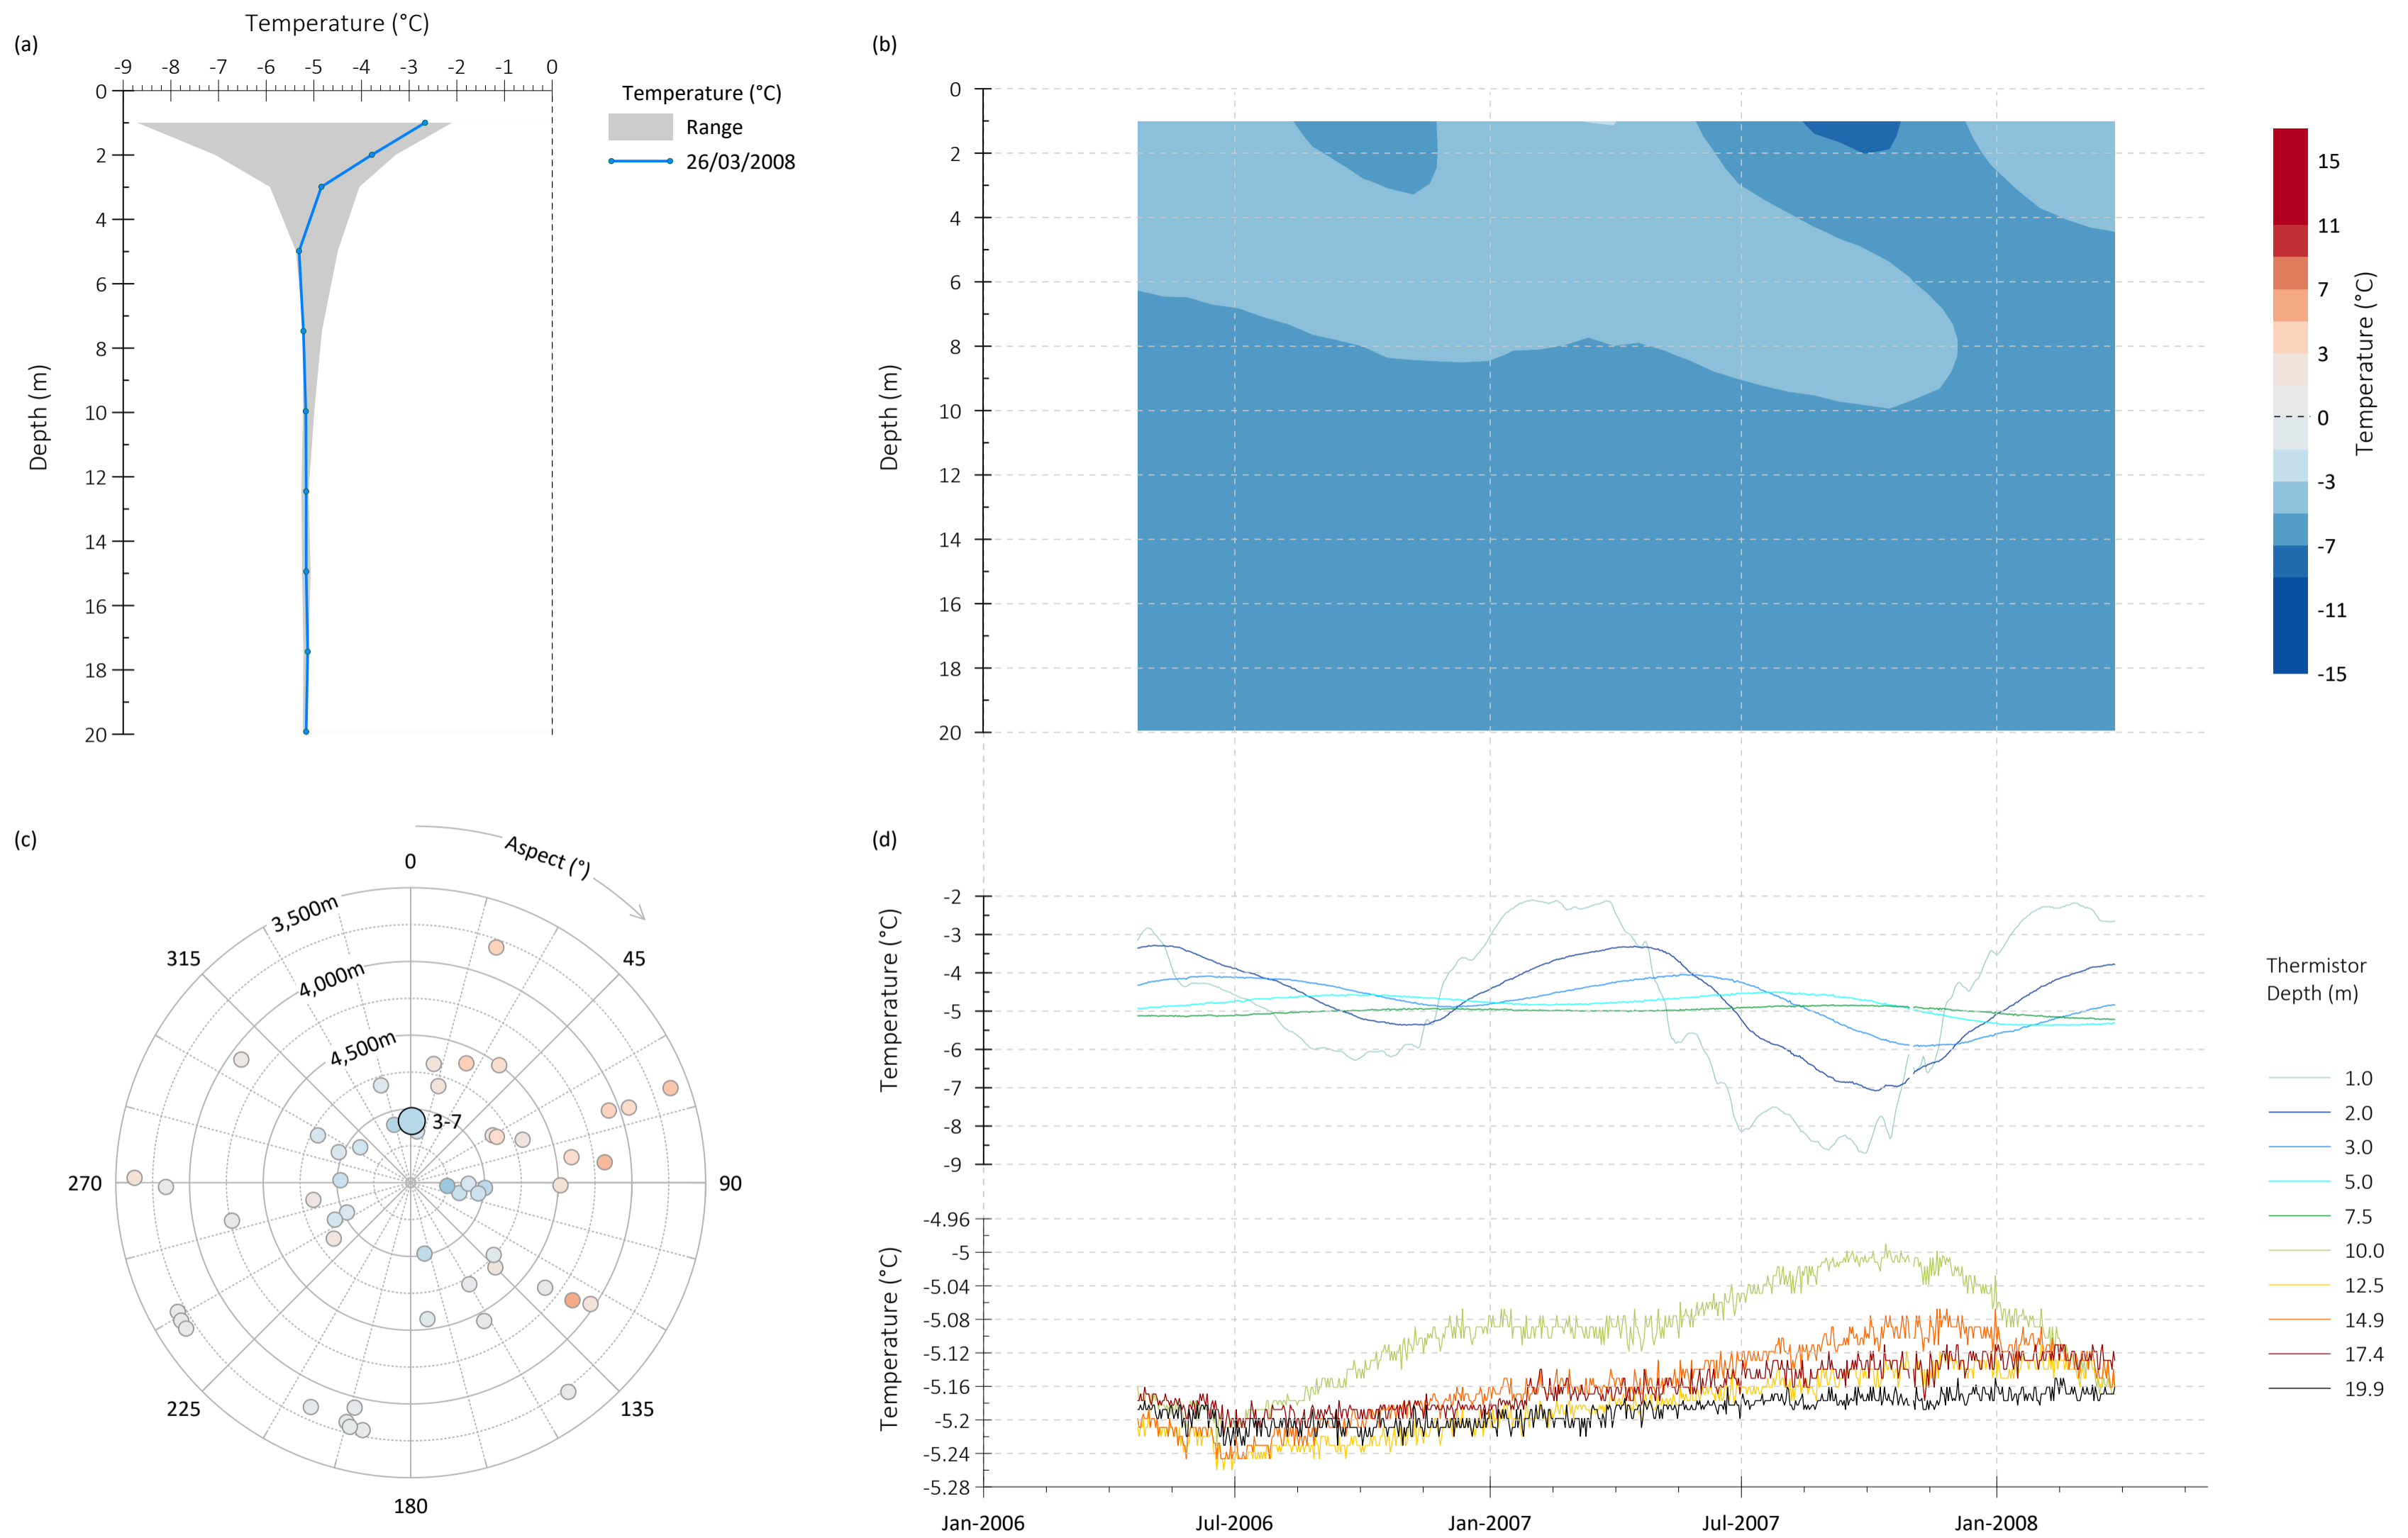

Figure S25: Ground thermal regime for Borehole 3-7 (El. = 5,082 m, Colluvium / weathered bedrock). Daily measurements collected between 22/04/2006 and 26/03/2008.

(a) Temperature depth profile. Range estimated using daily raw data. Most recent available measurement shown in blue.

(b) Interpreted borehole temperature evolution with time. Contours estimated from daily raw data. Active layer thickness indicated by black dots; horizontal lines indicate the depth of thermistors used for interpolation.

(c) Aspect-elevation-temperature diagram of most recent monthly temperatures below DZAA at all boreholes; colour scale same as plot (b). Borehole 3-7 ( $T = -5.17\text{ }^{\circ}\text{C}$ , depth=19.9 m) is indicated by enlarged symbol.

(d) Raw temperature time-series shown for all available sensors.

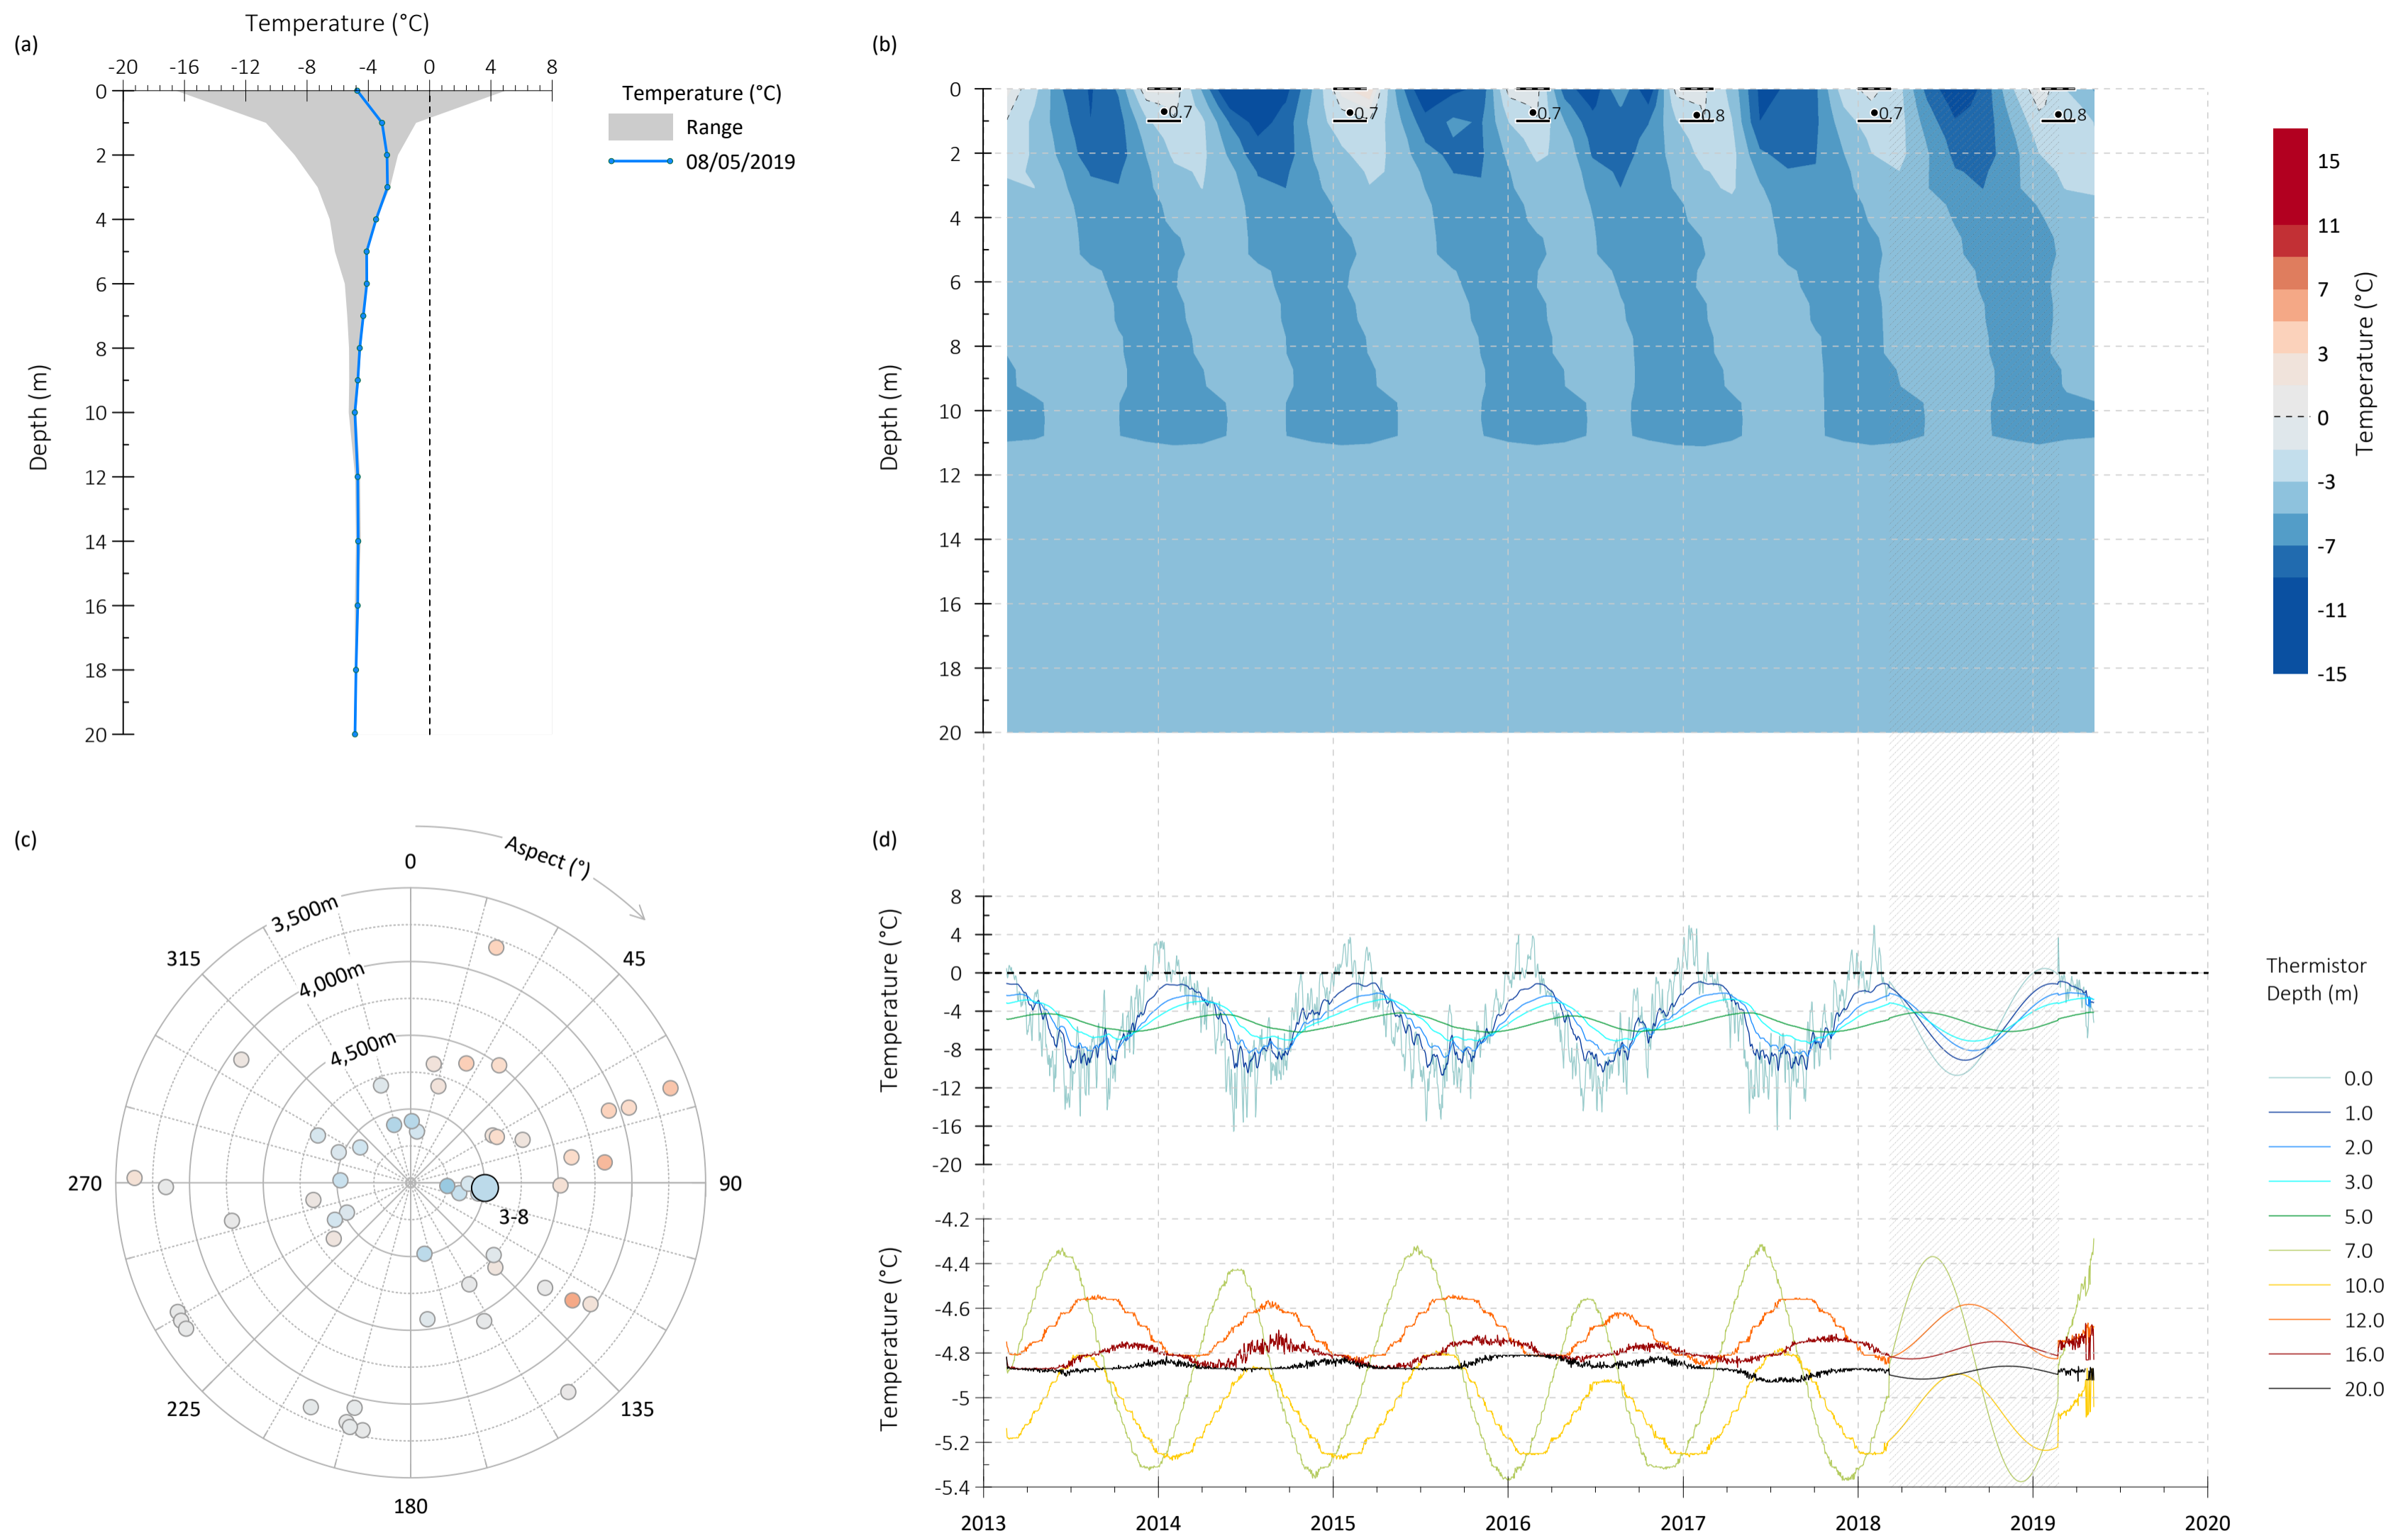

Figure S26: Ground thermal regime for Borehole 3-8 (El. = 4,995 m, Bedrock). Daily measurements collected between 18/02/2013 and 08/05/2019. Interpolated data indicated by grey hatched areas.

(a) Temperature depth profile. Range estimated using daily raw data and interpolated values. Most recent available measurement shown in blue.

(b) Interpreted borehole temperature evolution with time. Contours estimated from daily raw data and interpolated values. Active layer thickness indicated by black dots; horizontal lines indicate the depth of thermistors used for interpolation.

(c) Aspect-elevation-temperature diagram of most recent monthly temperatures below DZAA at all boreholes; colour scale same as plot (b). Borehole 3-8 ( $T = -4.89^{\circ}\text{C}$ , depth=20 m) is indicated by enlarged symbol.

(d) Raw temperature time-series for selected depths at Borehole 3-8. Full dataset includes measurements from 16 sensors. Daily interpolated values are also shown.

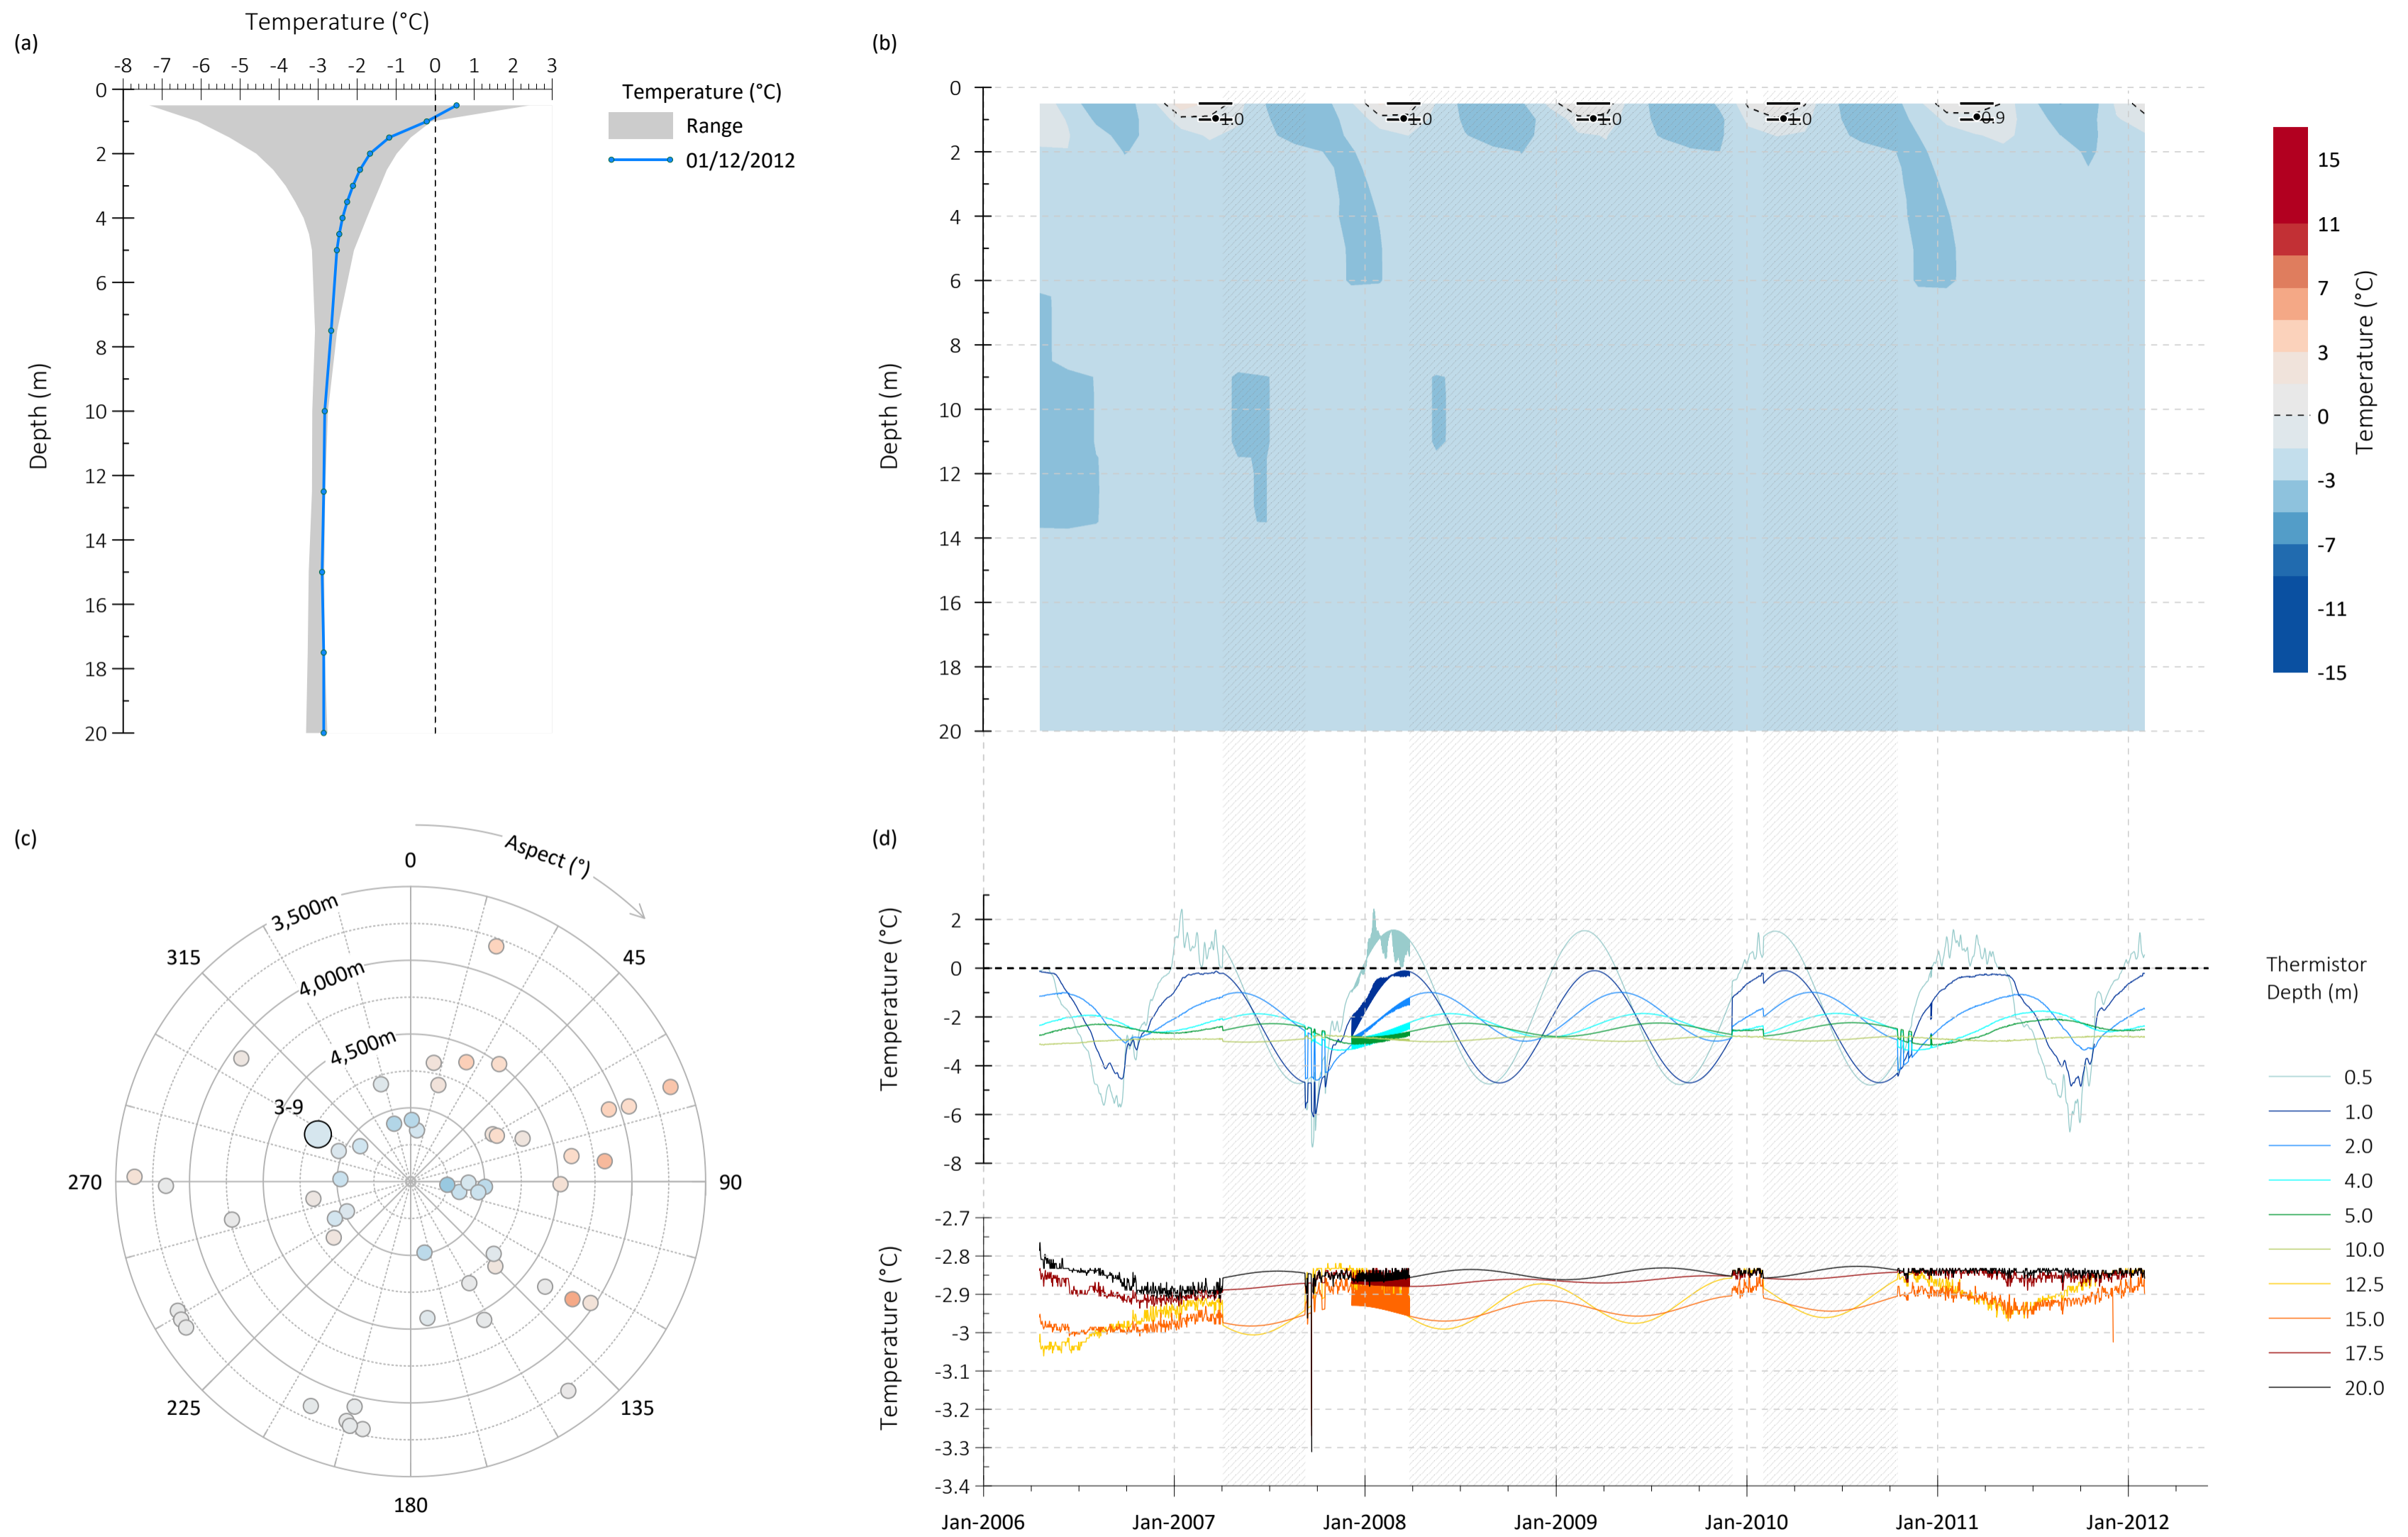

Figure S27: Ground thermal regime for Borehole 3-9 (El. = 4,794 m, Bedrock). Daily measurements collected between 18/04/2006 and 01/02/2012. Interpolated data indicated by grey hatched areas.

(a) Temperature depth profile. Range estimated using daily raw data and interpolated values. Most recent available measurement shown in blue.

(b) Interpreted borehole temperature evolution with time. Contours estimated from daily raw data and interpolated values. Active layer thickness indicated by black dots; horizontal lines indicate the depth of thermistors used for interpolation.

(c) Aspect-elevation-temperature diagram of most recent monthly temperatures below DZAA at all boreholes; colour scale same as plot (b). Borehole 3-9 ( $T = -2.86$  °C, depth=20 m) is indicated by enlarged symbol.

(d) Raw temperature time-series for selected depths at Borehole 3-9. Full dataset includes measurements from 16 sensors. Daily interpolated values are also shown.

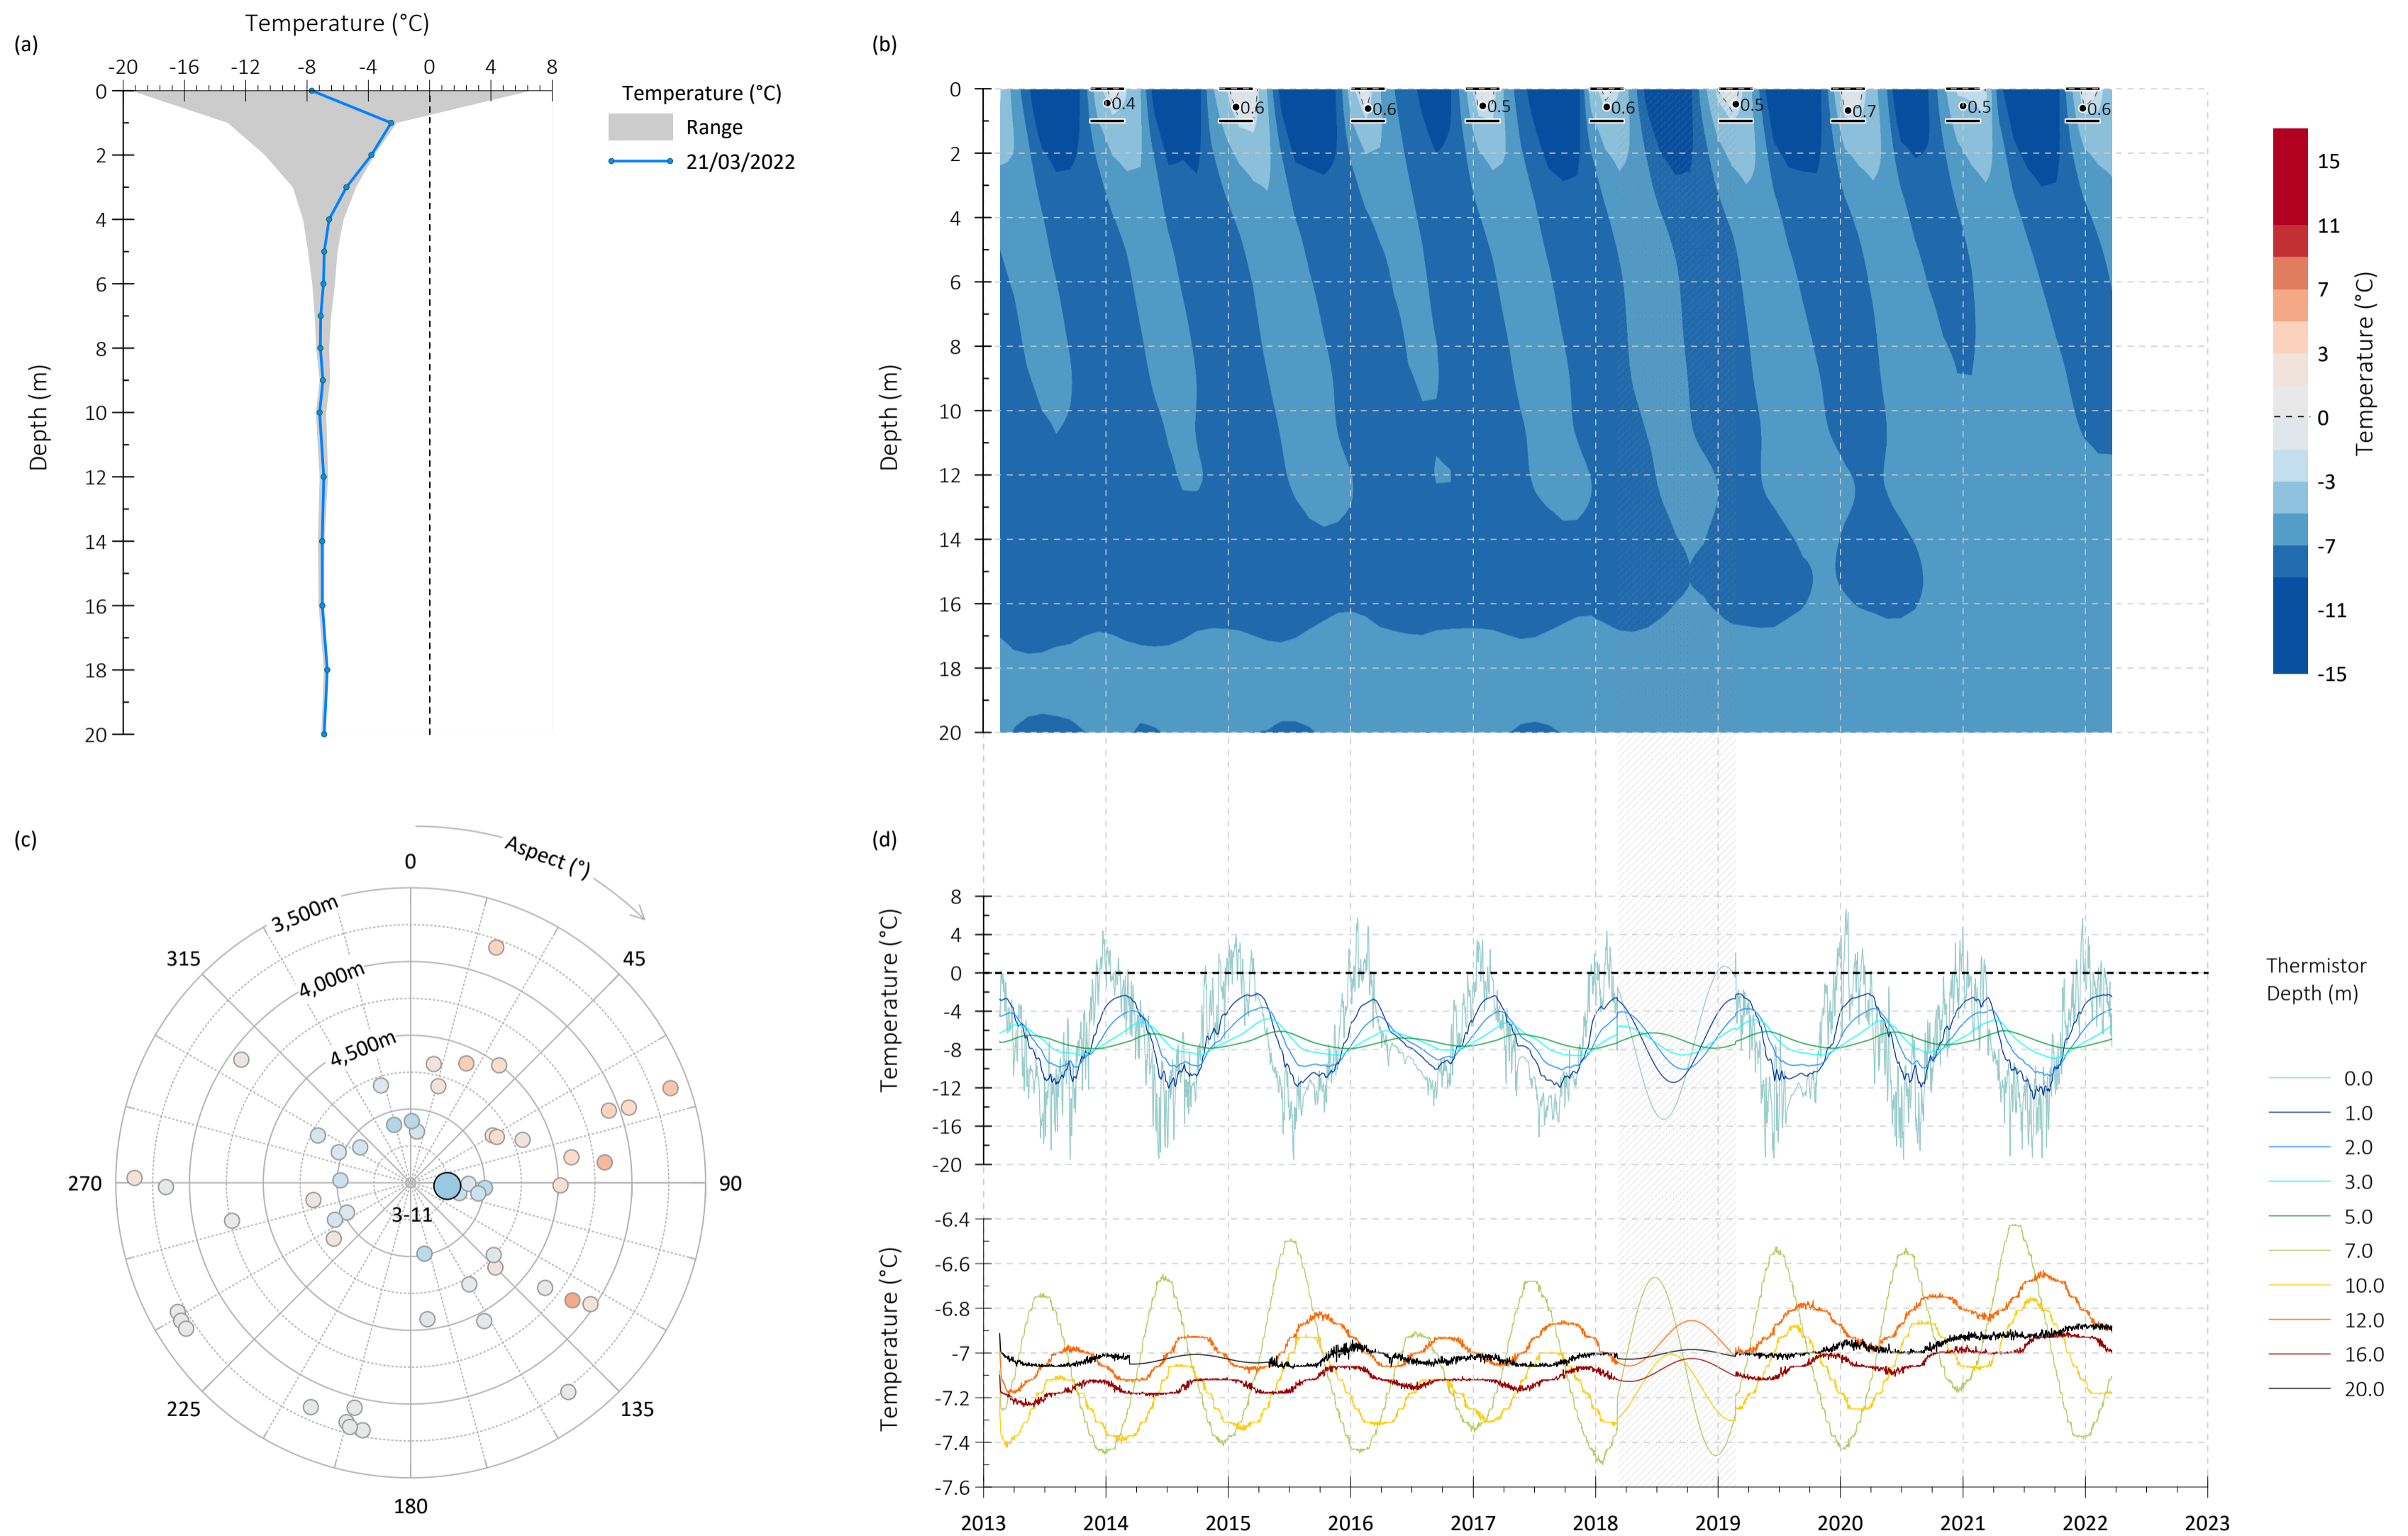

Figure S28: Ground thermal regime for Borehole 3-11 (El. = 5,251 m, Bedrock). Daily measurements collected between 02/03/2013 and 21/03/2022. Interpolated data indicated by grey hatched areas.

(a) Temperature depth profile. Range estimated using daily raw data and interpolated values. Most recent available measurement shown in blue.

(b) Interpreted borehole temperature evolution with time. Contours estimated from daily raw data and interpolated values. Active layer thickness indicated by black dots; horizontal lines indicate the depth of thermistors used for interpolation.

(c) Aspect-elevation-temperature diagram of most recent monthly temperatures below DZAA at all boreholes; colour scale same as plot (b). Borehole 3-11 ( $T = -6.89$  °C, depth=20 m) is indicated by enlarged symbol.

(d) Raw temperature time-series for selected depths at Borehole 3-11. Full dataset includes measurements from 16 sensors. Daily interpolated values are also shown.



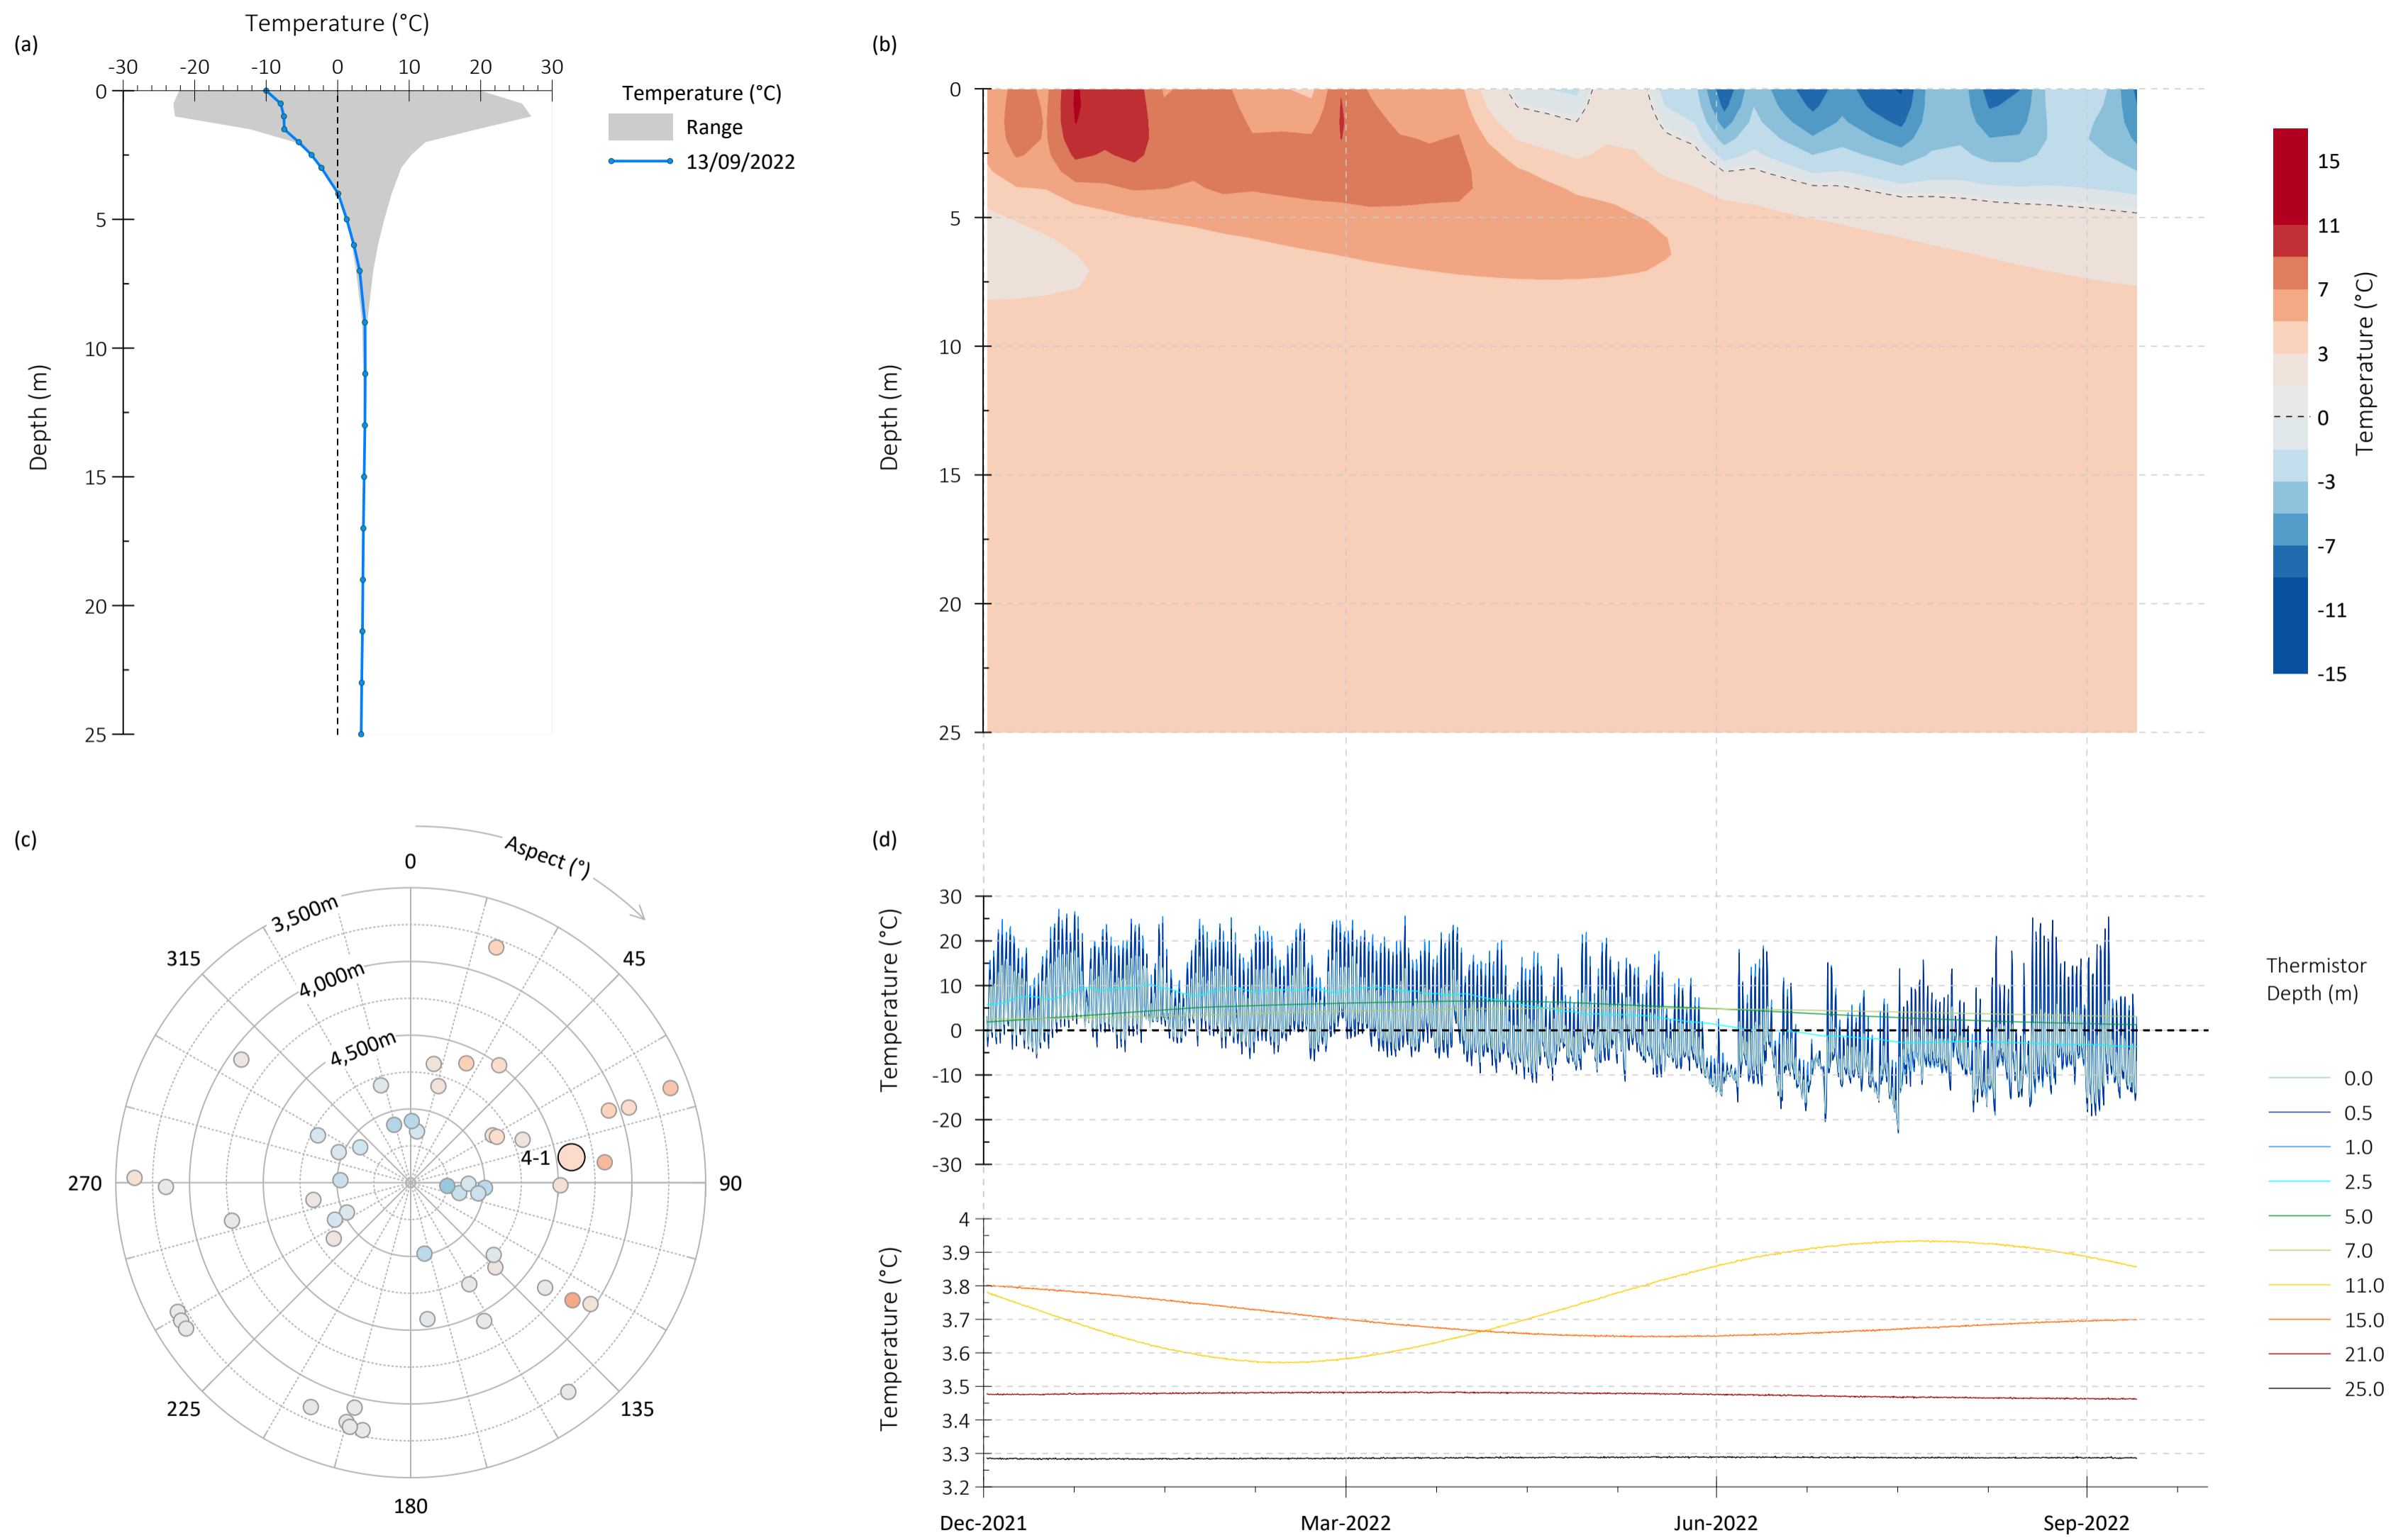

Figure S30: Ground thermal regime for Borehole 4-1 (El. = 4,396 m, Colluvium). Measurements collected approximately every 4 hours between 01/12/2021 and 13/09/2022.

(a) Temperature depth profile. Range estimated using hourly raw data. Daily average of most recent available measurements shown in blue.

(b) Interpreted borehole temperature evolution with time. Contours estimated from hourly raw data.

(c) Aspect-elevation-temperature diagram of most recent monthly temperatures below DZAA at all boreholes; colour scale same as plot (b). Borehole 4-1 ( $T = 3.46\text{ }^{\circ}\text{C}$ , depth=21 m) is indicated by enlarged symbol.

(d) Raw temperature time-series for selected depths at Borehole 4-1. Full dataset includes measurements from 19 sensors.

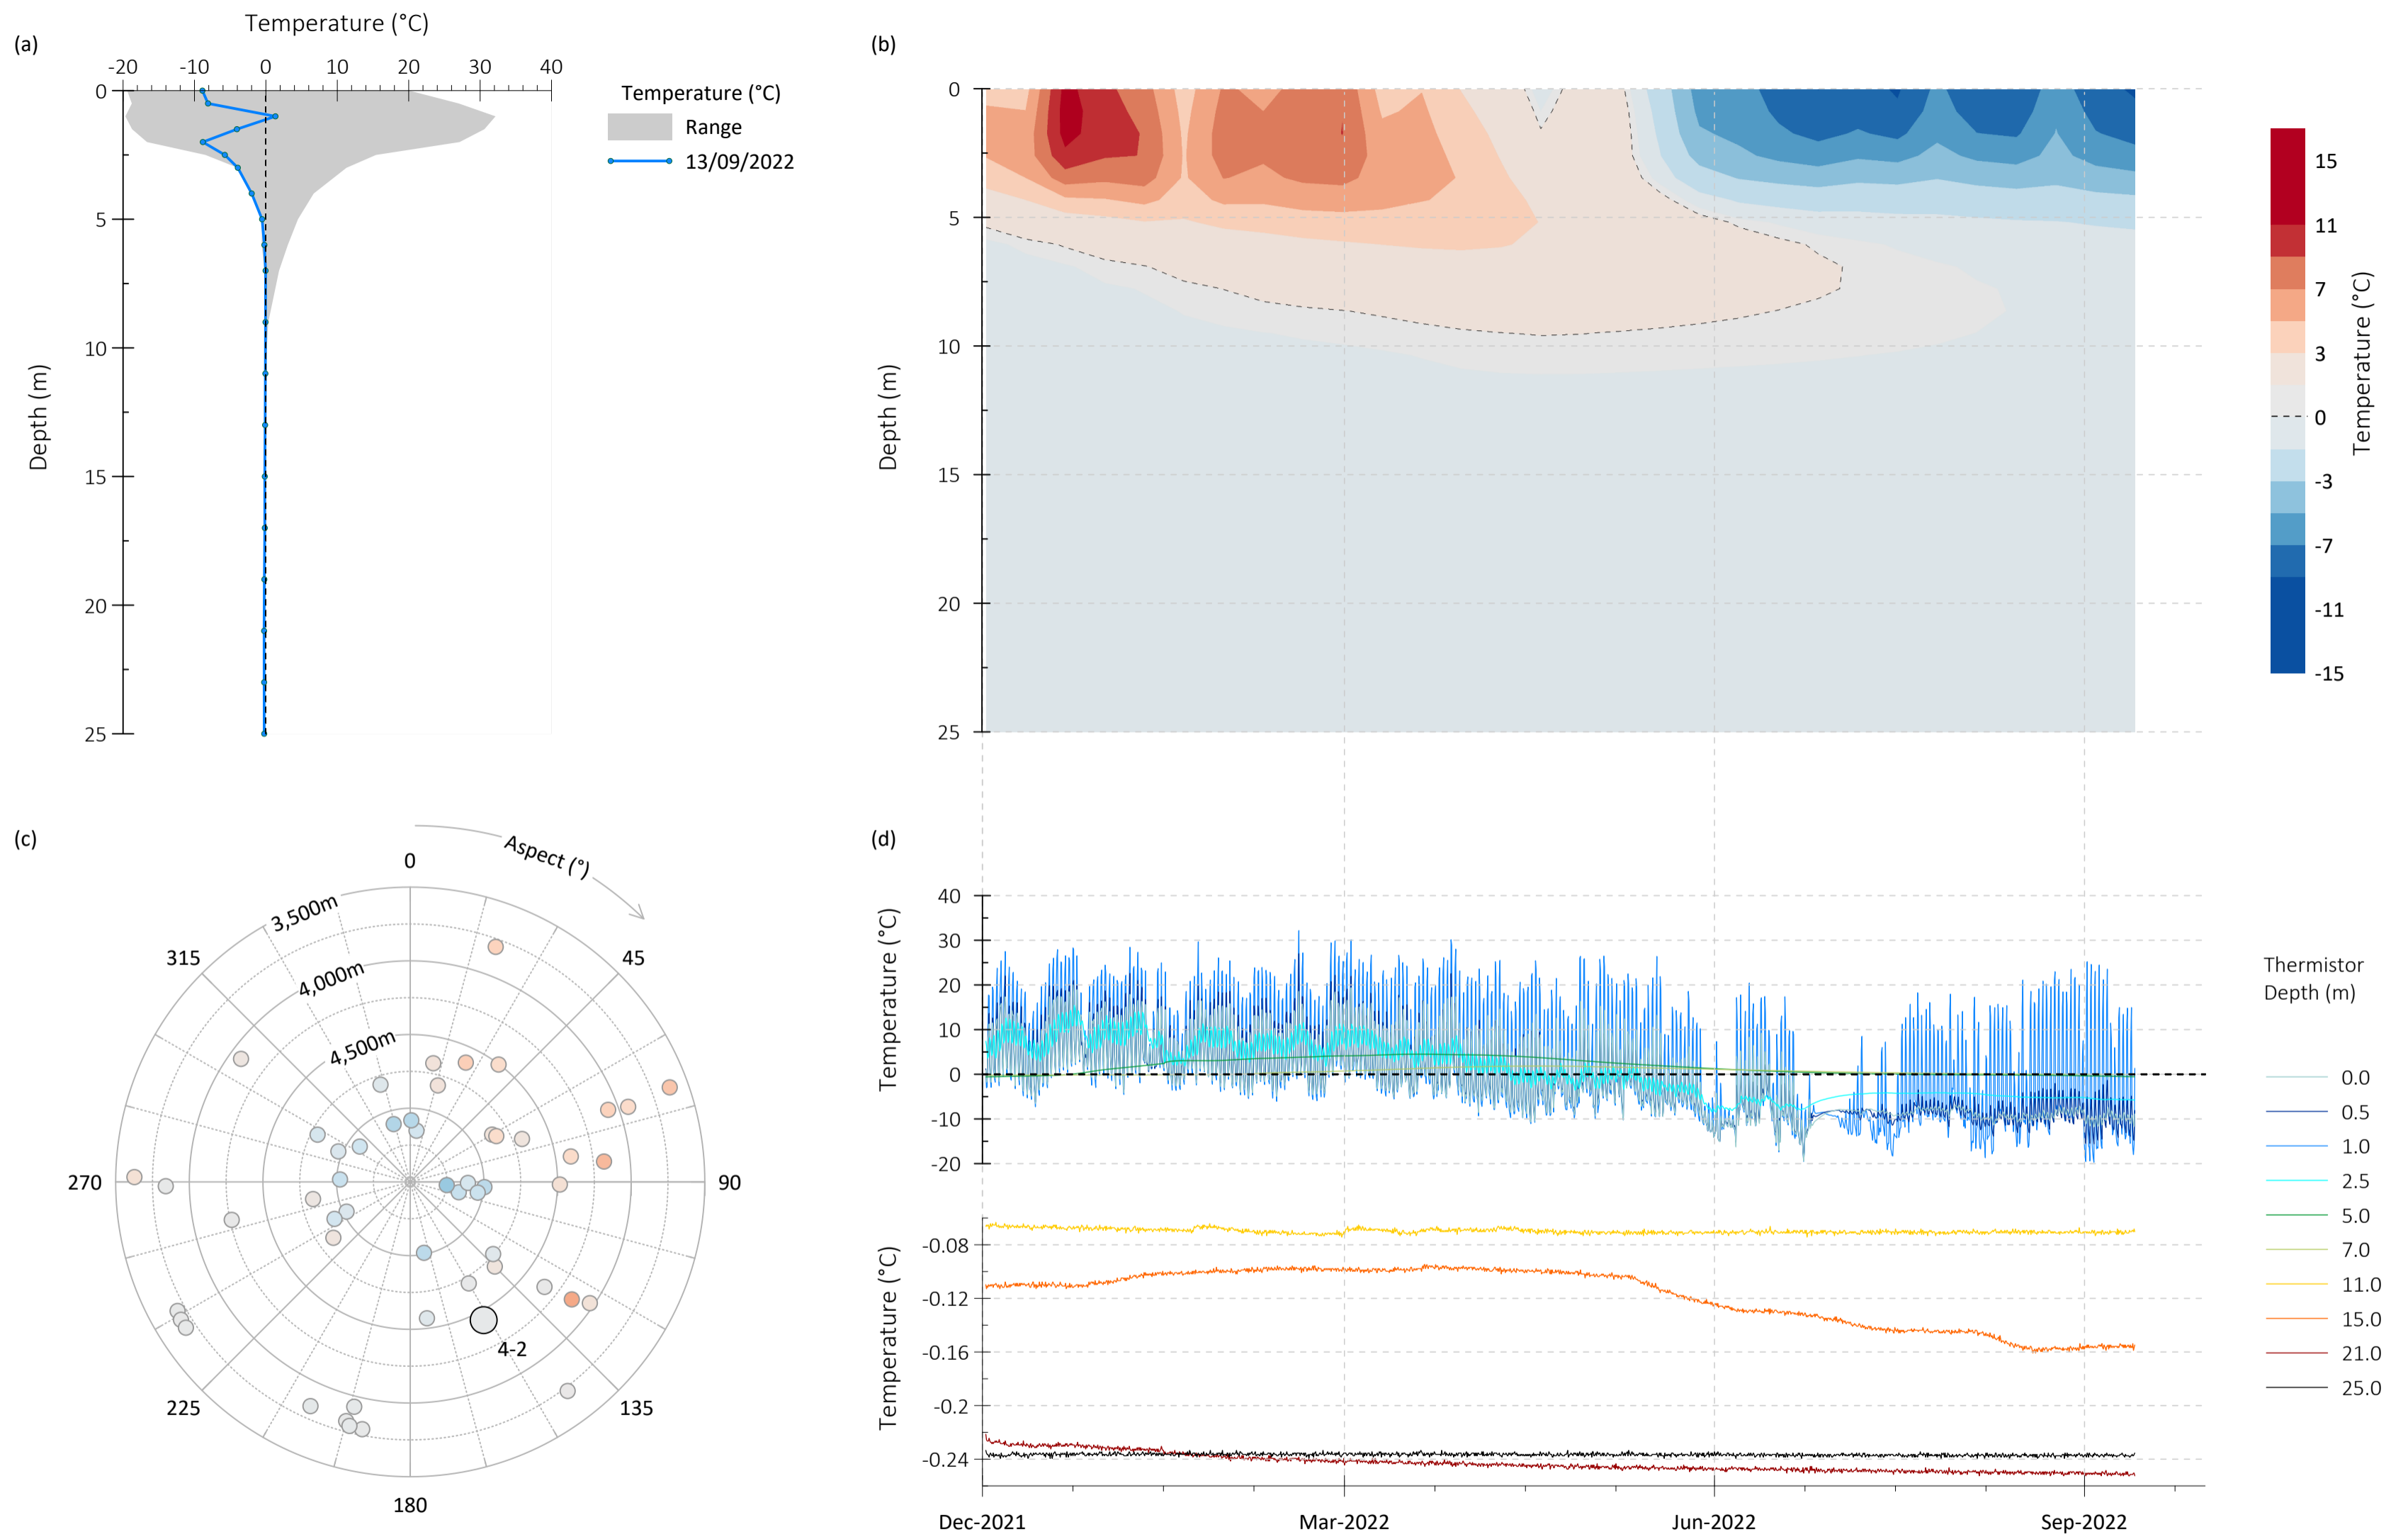

Figure S31: Ground thermal regime for Borehole 4-2 (El. = 4,438 m, Colluvium). Measurements collected approximately every 4 hours between 01/12/2021 and 13/09/2022.

(a) Temperature depth profile. Range estimated using hourly raw data. Daily average of most recent available measurements shown in blue.

(b) Interpreted borehole temperature evolution with time. Contours estimated from hourly raw data.

(c) Aspect-elevation-temperature diagram of most recent monthly temperatures below DZAA at all boreholes; colour scale same as plot (b). Borehole 4-2 ( $T = -0.25$  °C, depth=21 m) is indicated by enlarged symbol.

(d) Raw temperature time-series for selected depths at Borehole 4-2. Full dataset includes measurements from 19 sensors.

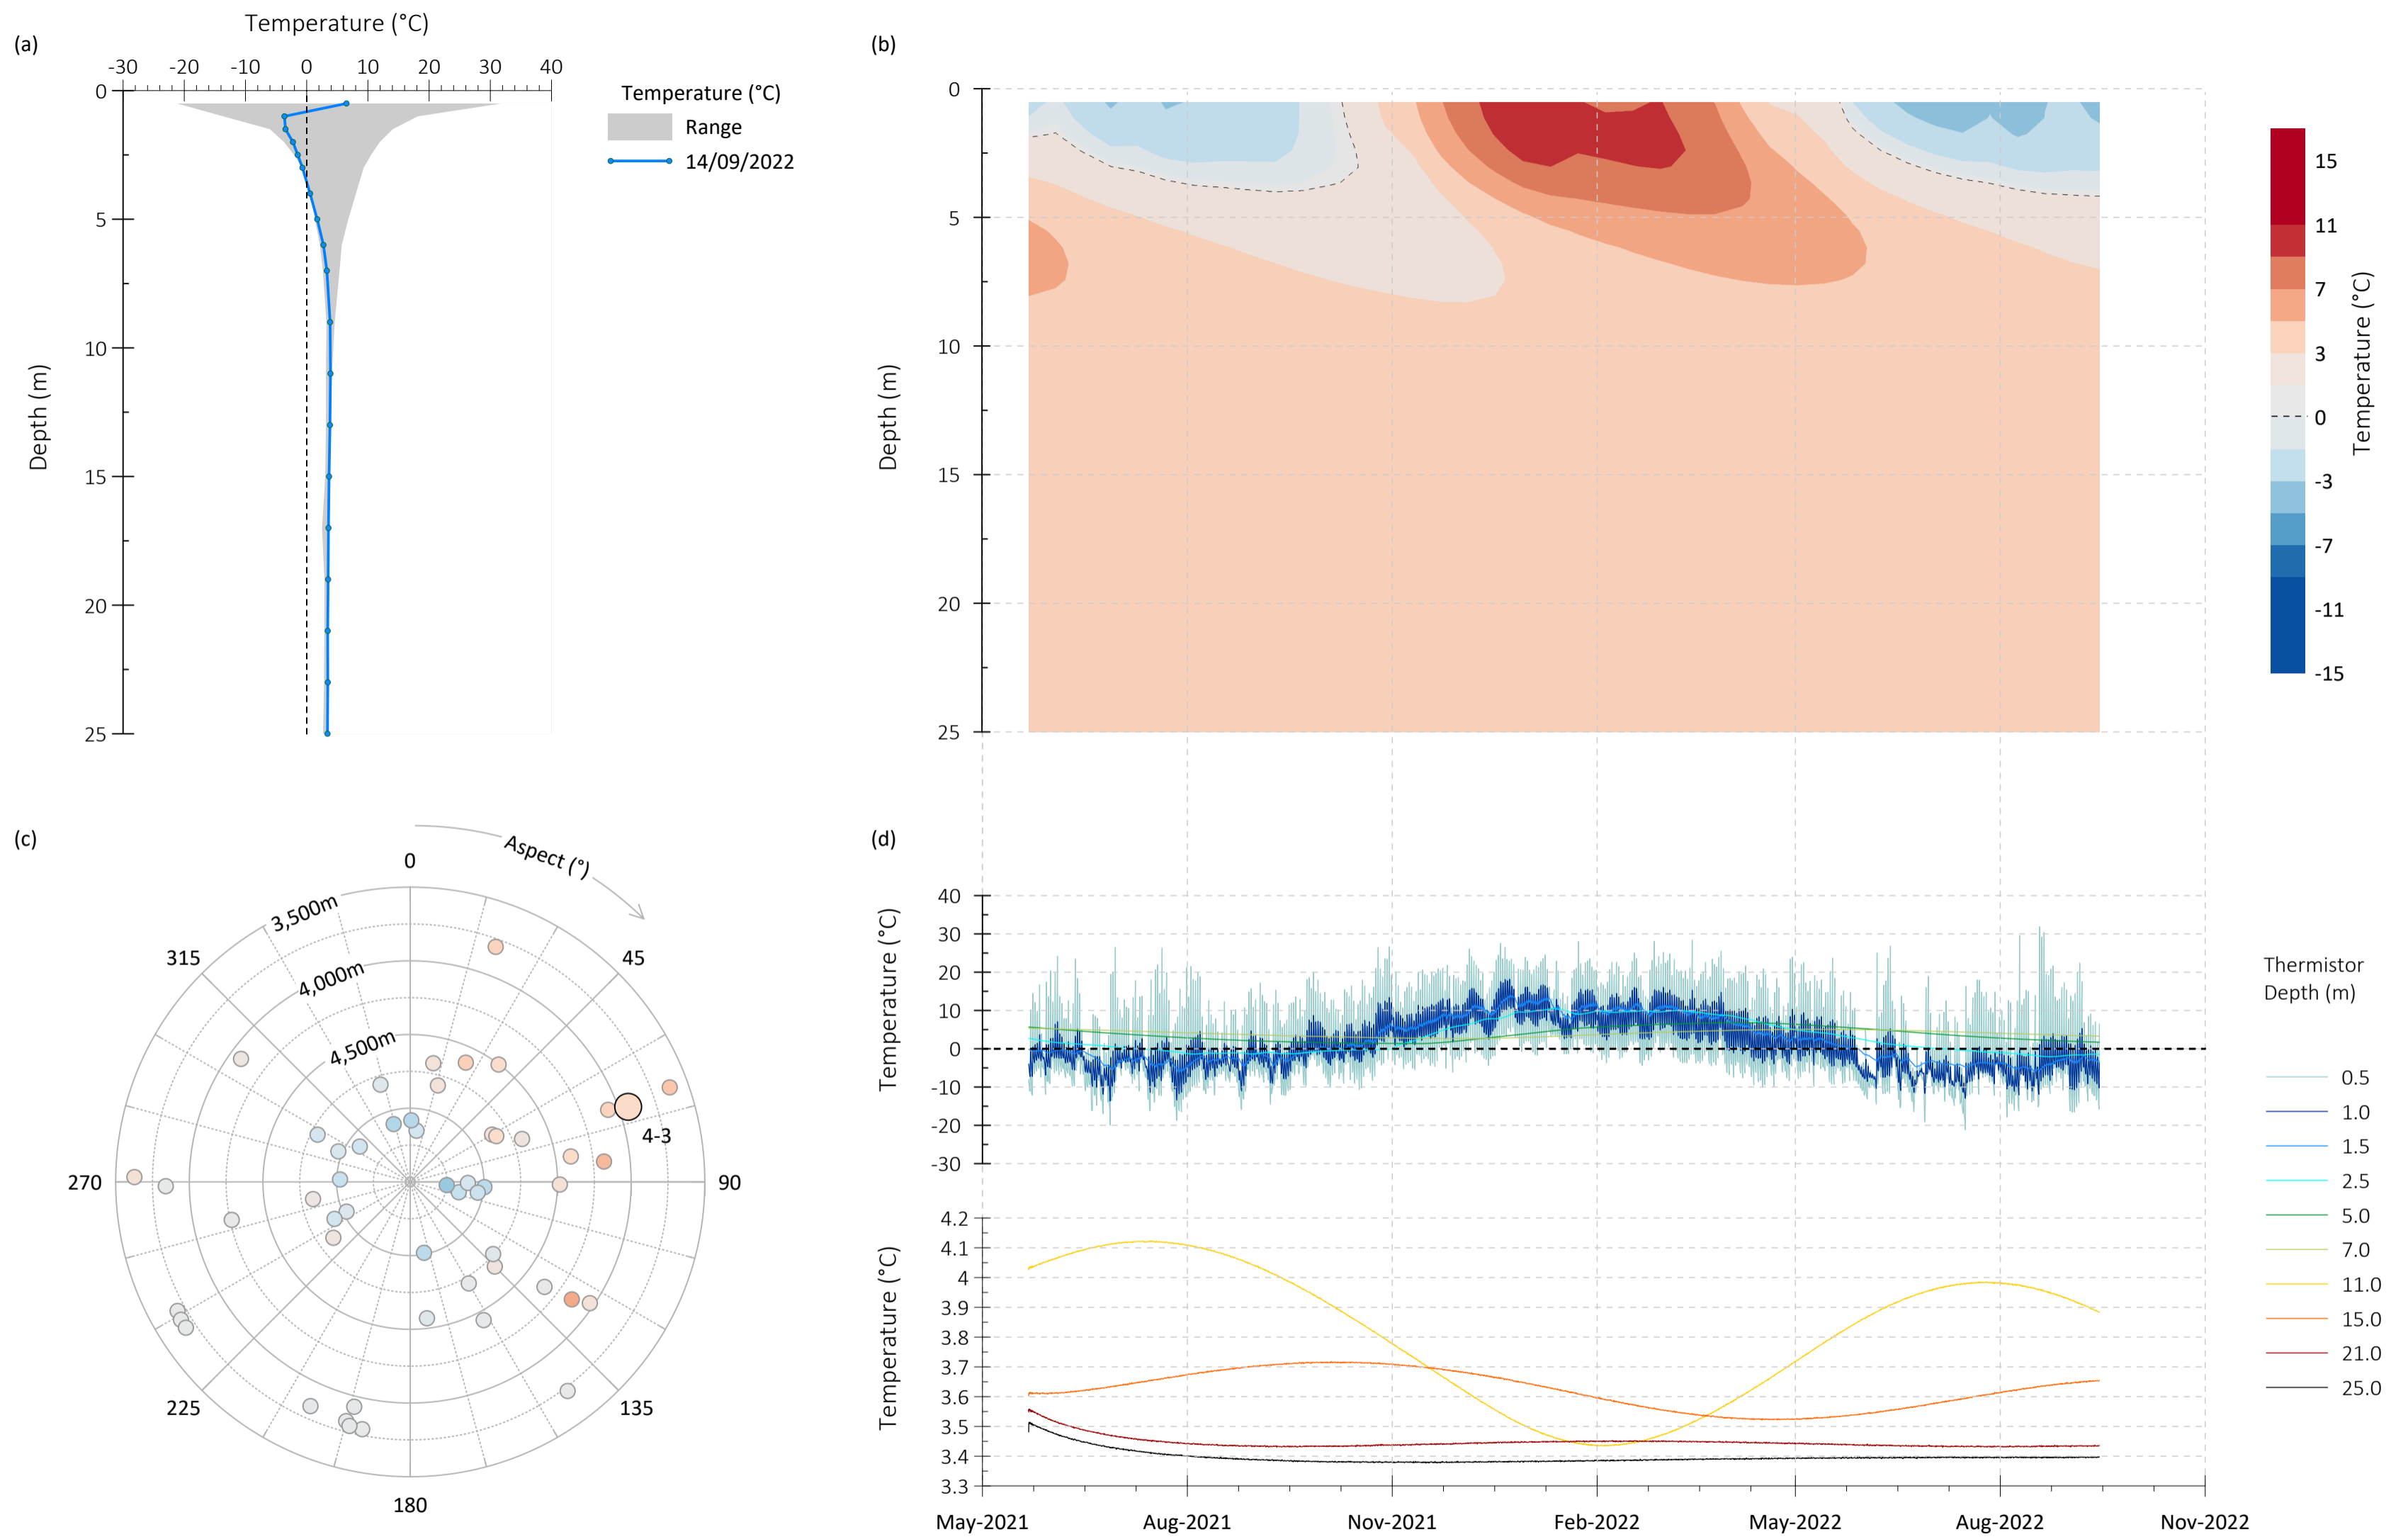

Figure S32: Ground thermal regime for Borehole 4-3 (El. = 3,935 m, Colluvium). Measurements collected approximately every 4 hours between 21/05/2021 and 14/09/2022.

(a) Temperature depth profile. Range estimated using hourly raw data. Daily average of most recent available measurements shown in blue.

(b) Interpreted borehole temperature evolution with time. Contours estimated from hourly raw data.

(c) Aspect-elevation-temperature diagram of most recent monthly temperatures below DZAA at all boreholes; colour scale same as plot (b). Borehole 4-3 (T = 3.43 °C, depth = 21 m) is indicated by enlarged symbol.

(d) Raw temperature time-series for selected depths at Borehole 4-3. Full dataset includes measurements from 19 sensors.

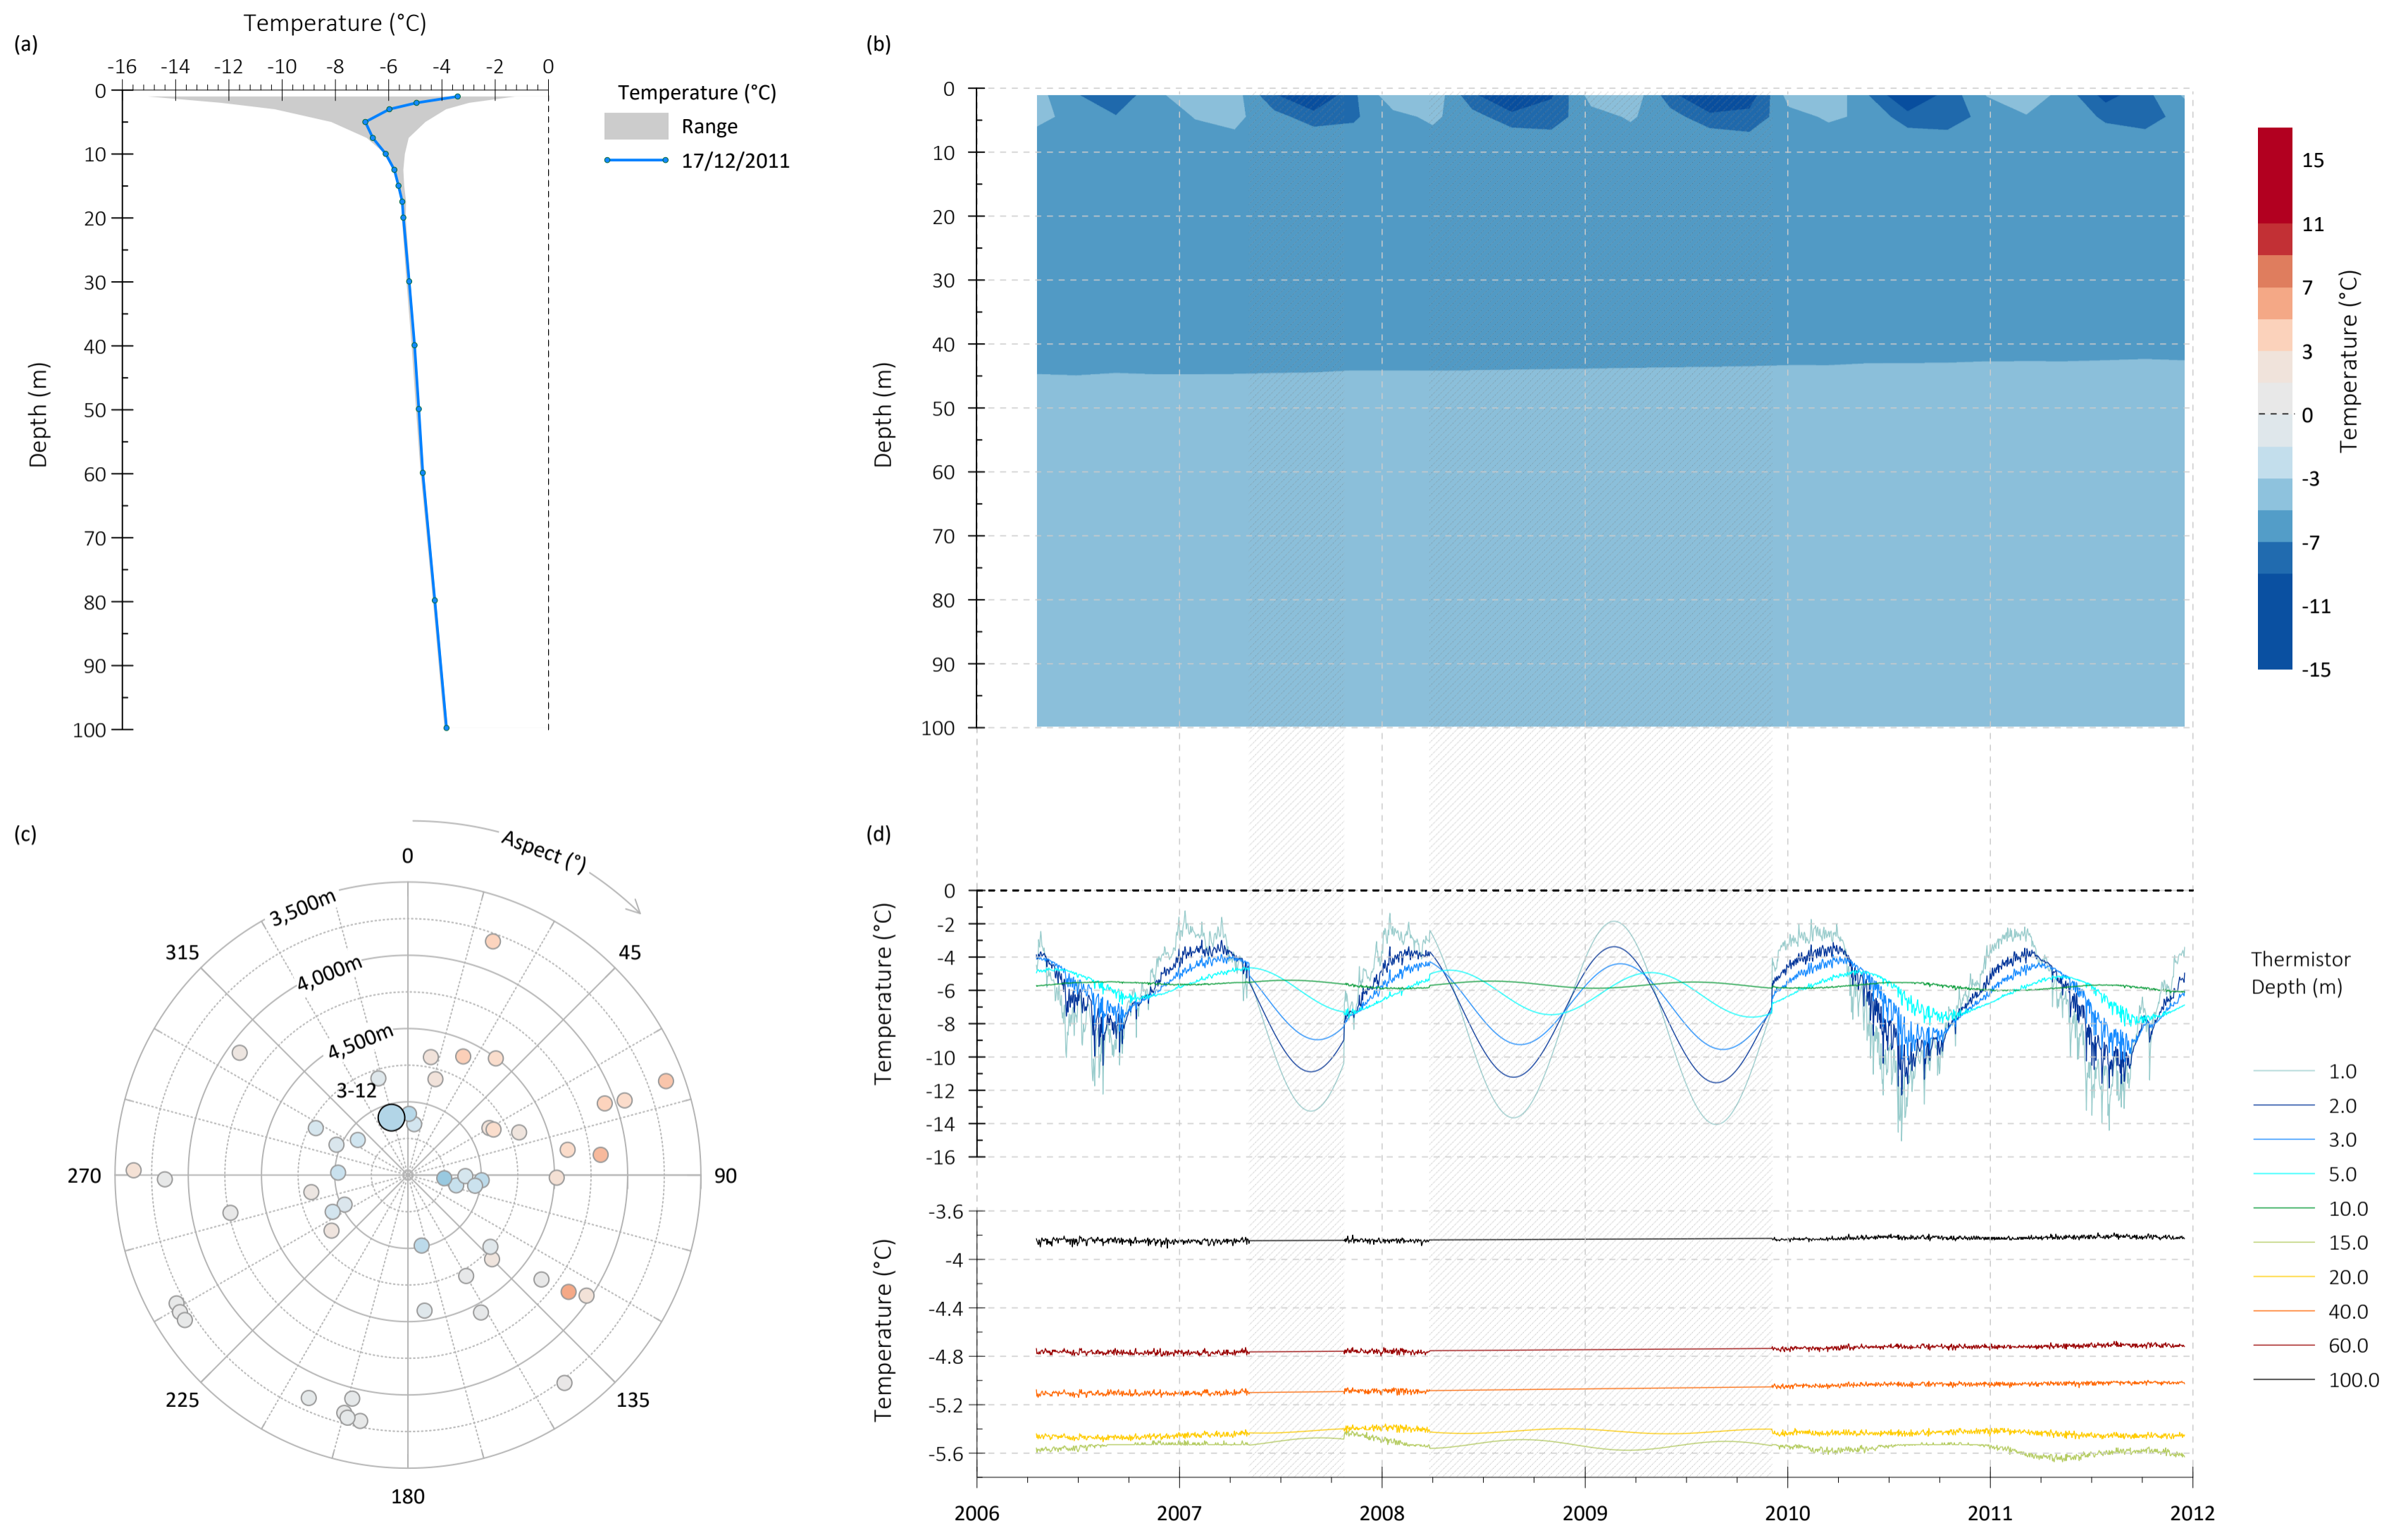

Figure S29: Ground thermal regime for Borehole 3-12 (El. = 5,092 m, Bedrock (thin weathered overburden)). Daily measurements collected between 18/04/2006 and 17/12/2011. Interpolated data indicated by grey hatched areas.

(a) Temperature depth profile. Range estimated using daily raw data and interpolated values. Most recent available measurement shown in blue.

(b) Interpreted borehole temperature evolution with time. Contours estimated from daily raw data and interpolated values. Active layer thickness indicated by black dots; horizontal lines indicate the depth of thermistors used for interpolation.

(c) Aspect-elevation-temperature diagram of most recent monthly temperatures below DZAA at all boreholes; colour scale same as plot (b). Borehole 3-12 ( $T = -5.45$  °C, depth=20 m) is indicated by enlarged symbol.

(d) Raw temperature time-series for selected depths at Borehole 3-12. Full dataset includes measurements from 16 sensors. Daily interpolated values are also shown.

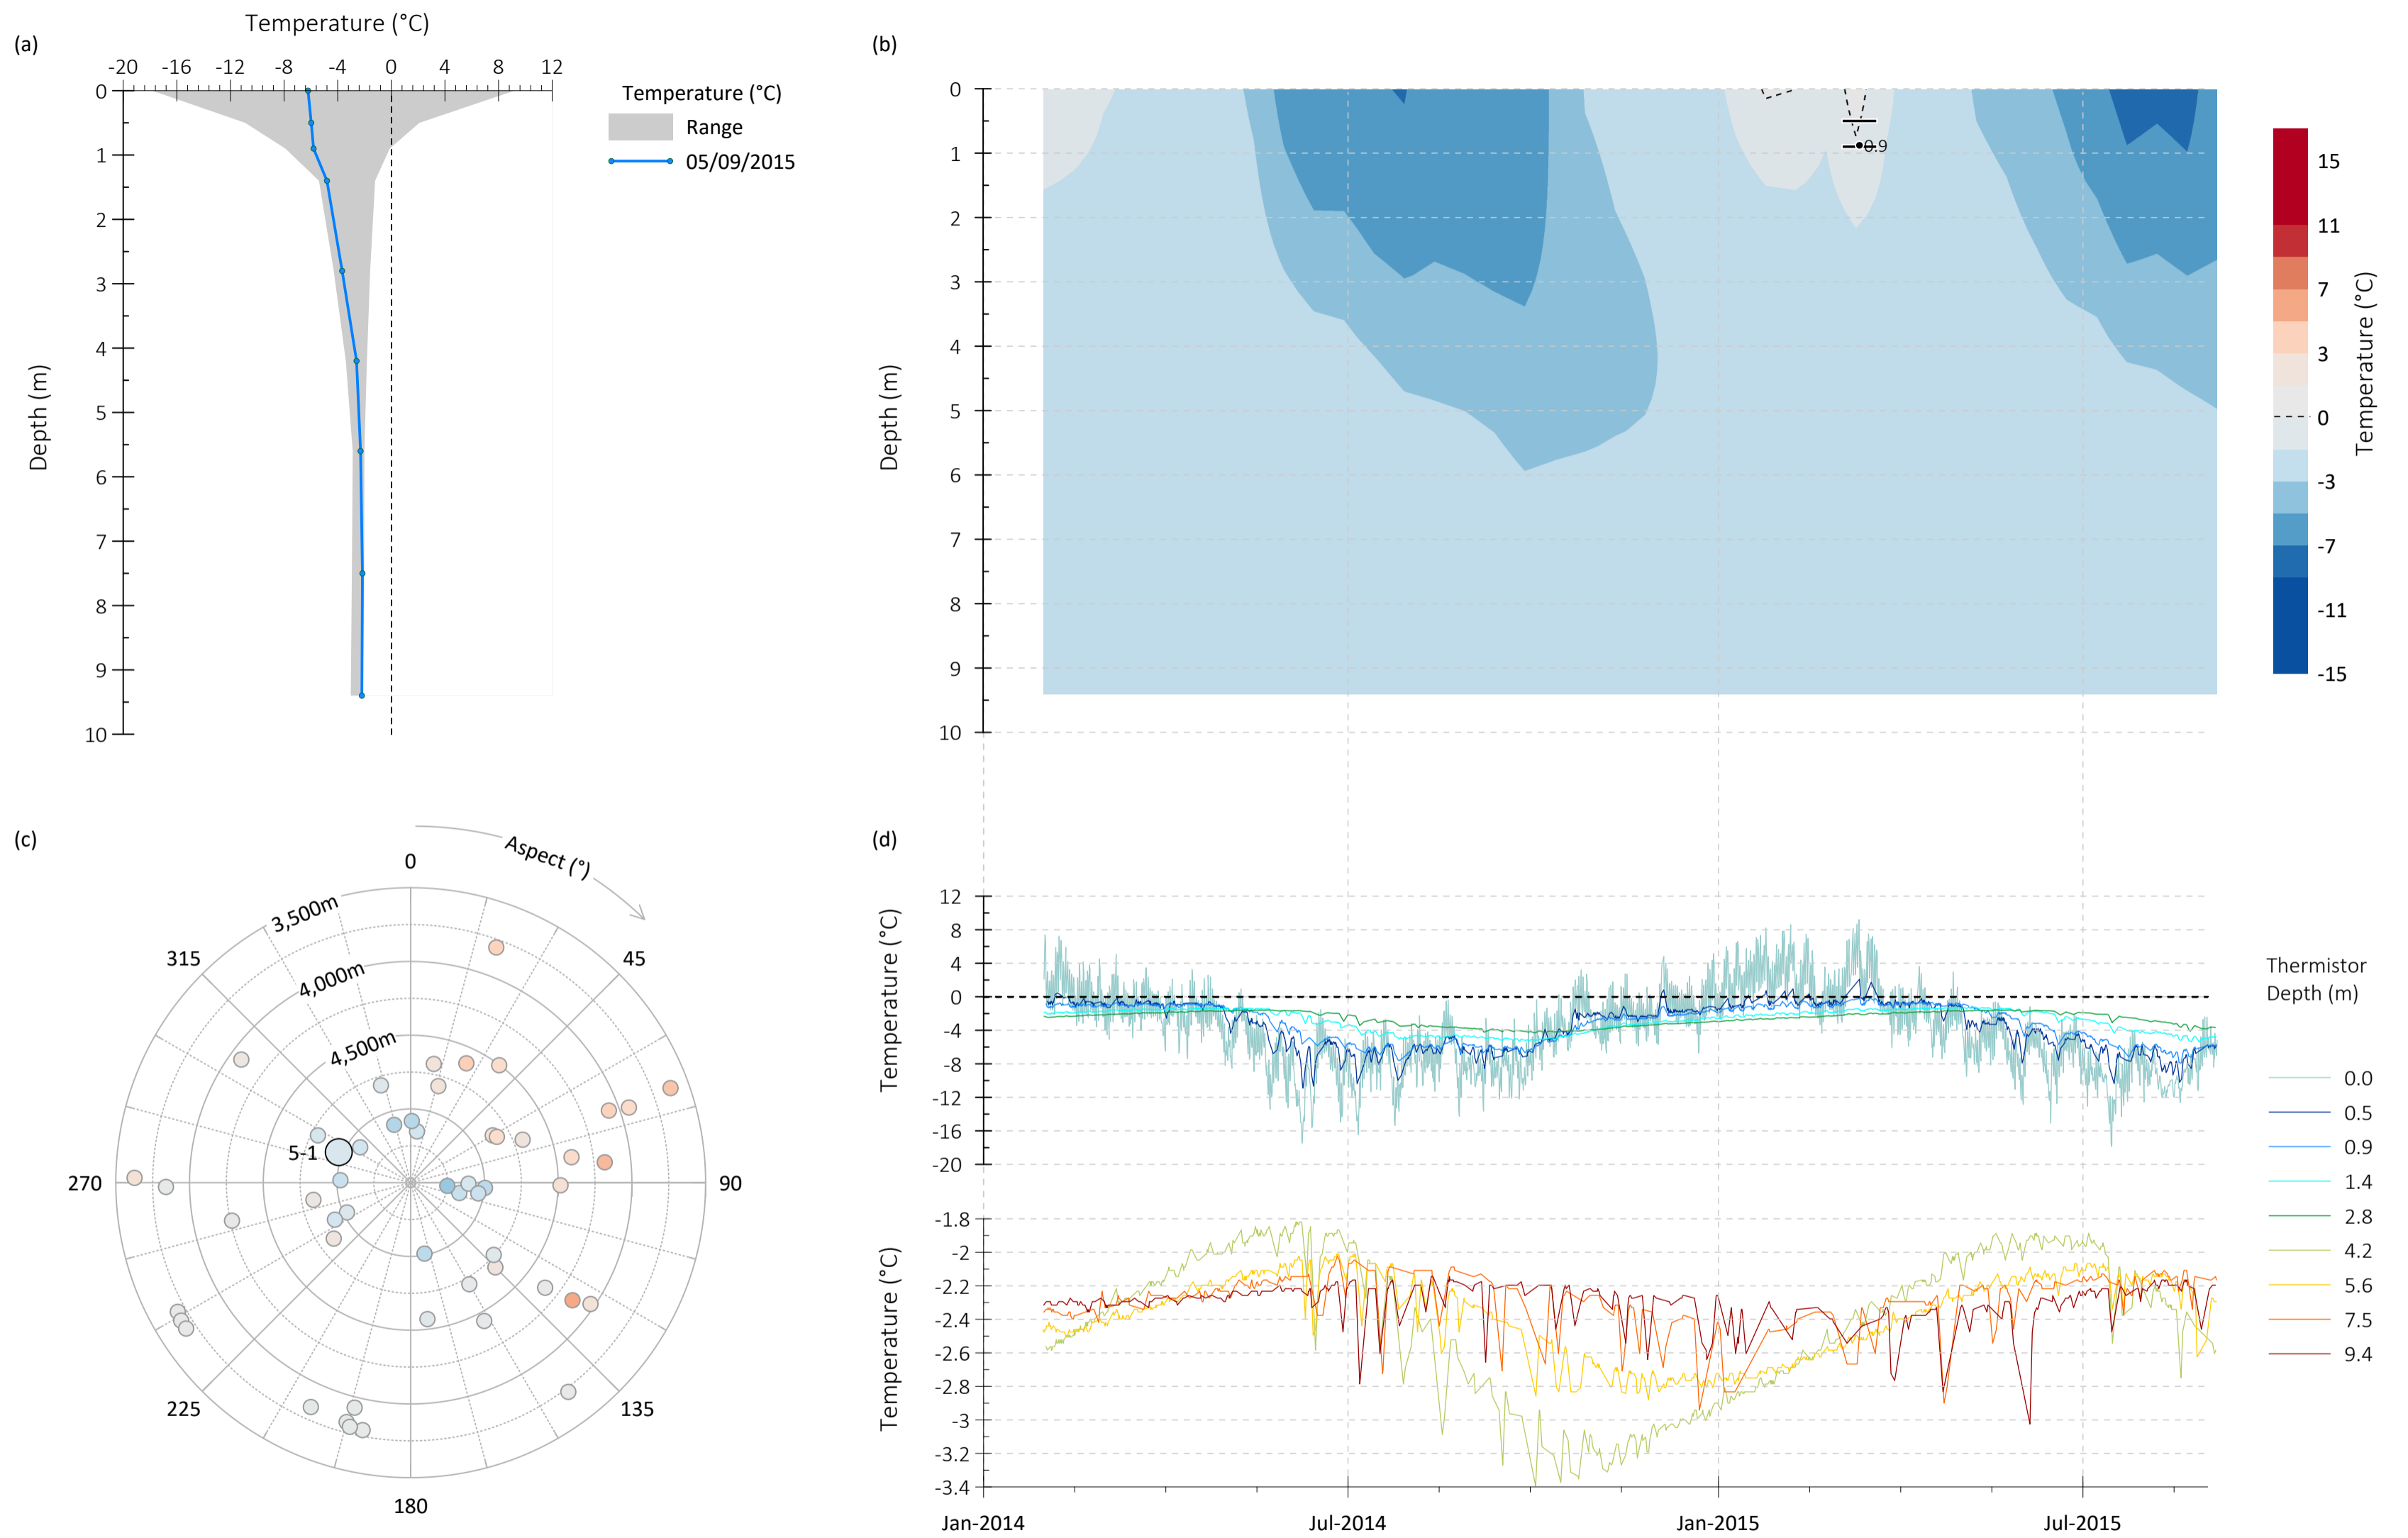

Figure S33: Ground thermal regime for Borehole 5-1 (El. = 4,970 m, Colluvium (thin veneer)). Measurements collected approximately every 4 hours between 30/01/2014 and 05/09/2015. Monitoring discontinued in 2015 due to erosional feature.

(a) Temperature depth profile. Range estimated using hourly raw data. Daily average of most recent available measurements shown in blue.

(b) Interpreted borehole temperature evolution with time. Contours estimated from hourly raw data. Active layer thickness indicated by black dots; horizontal lines indicate the depth of thermistors used for interpolation.

(c) Aspect-elevation-temperature diagram of most recent monthly temperatures below DZAA at all boreholes; colour scale same as plot (b). Borehole 5-1 ( $T = -2.21$  °C, depth=9.4 m) is indicated by enlarged symbol.

(d) Raw temperature time-series shown for all available sensors.

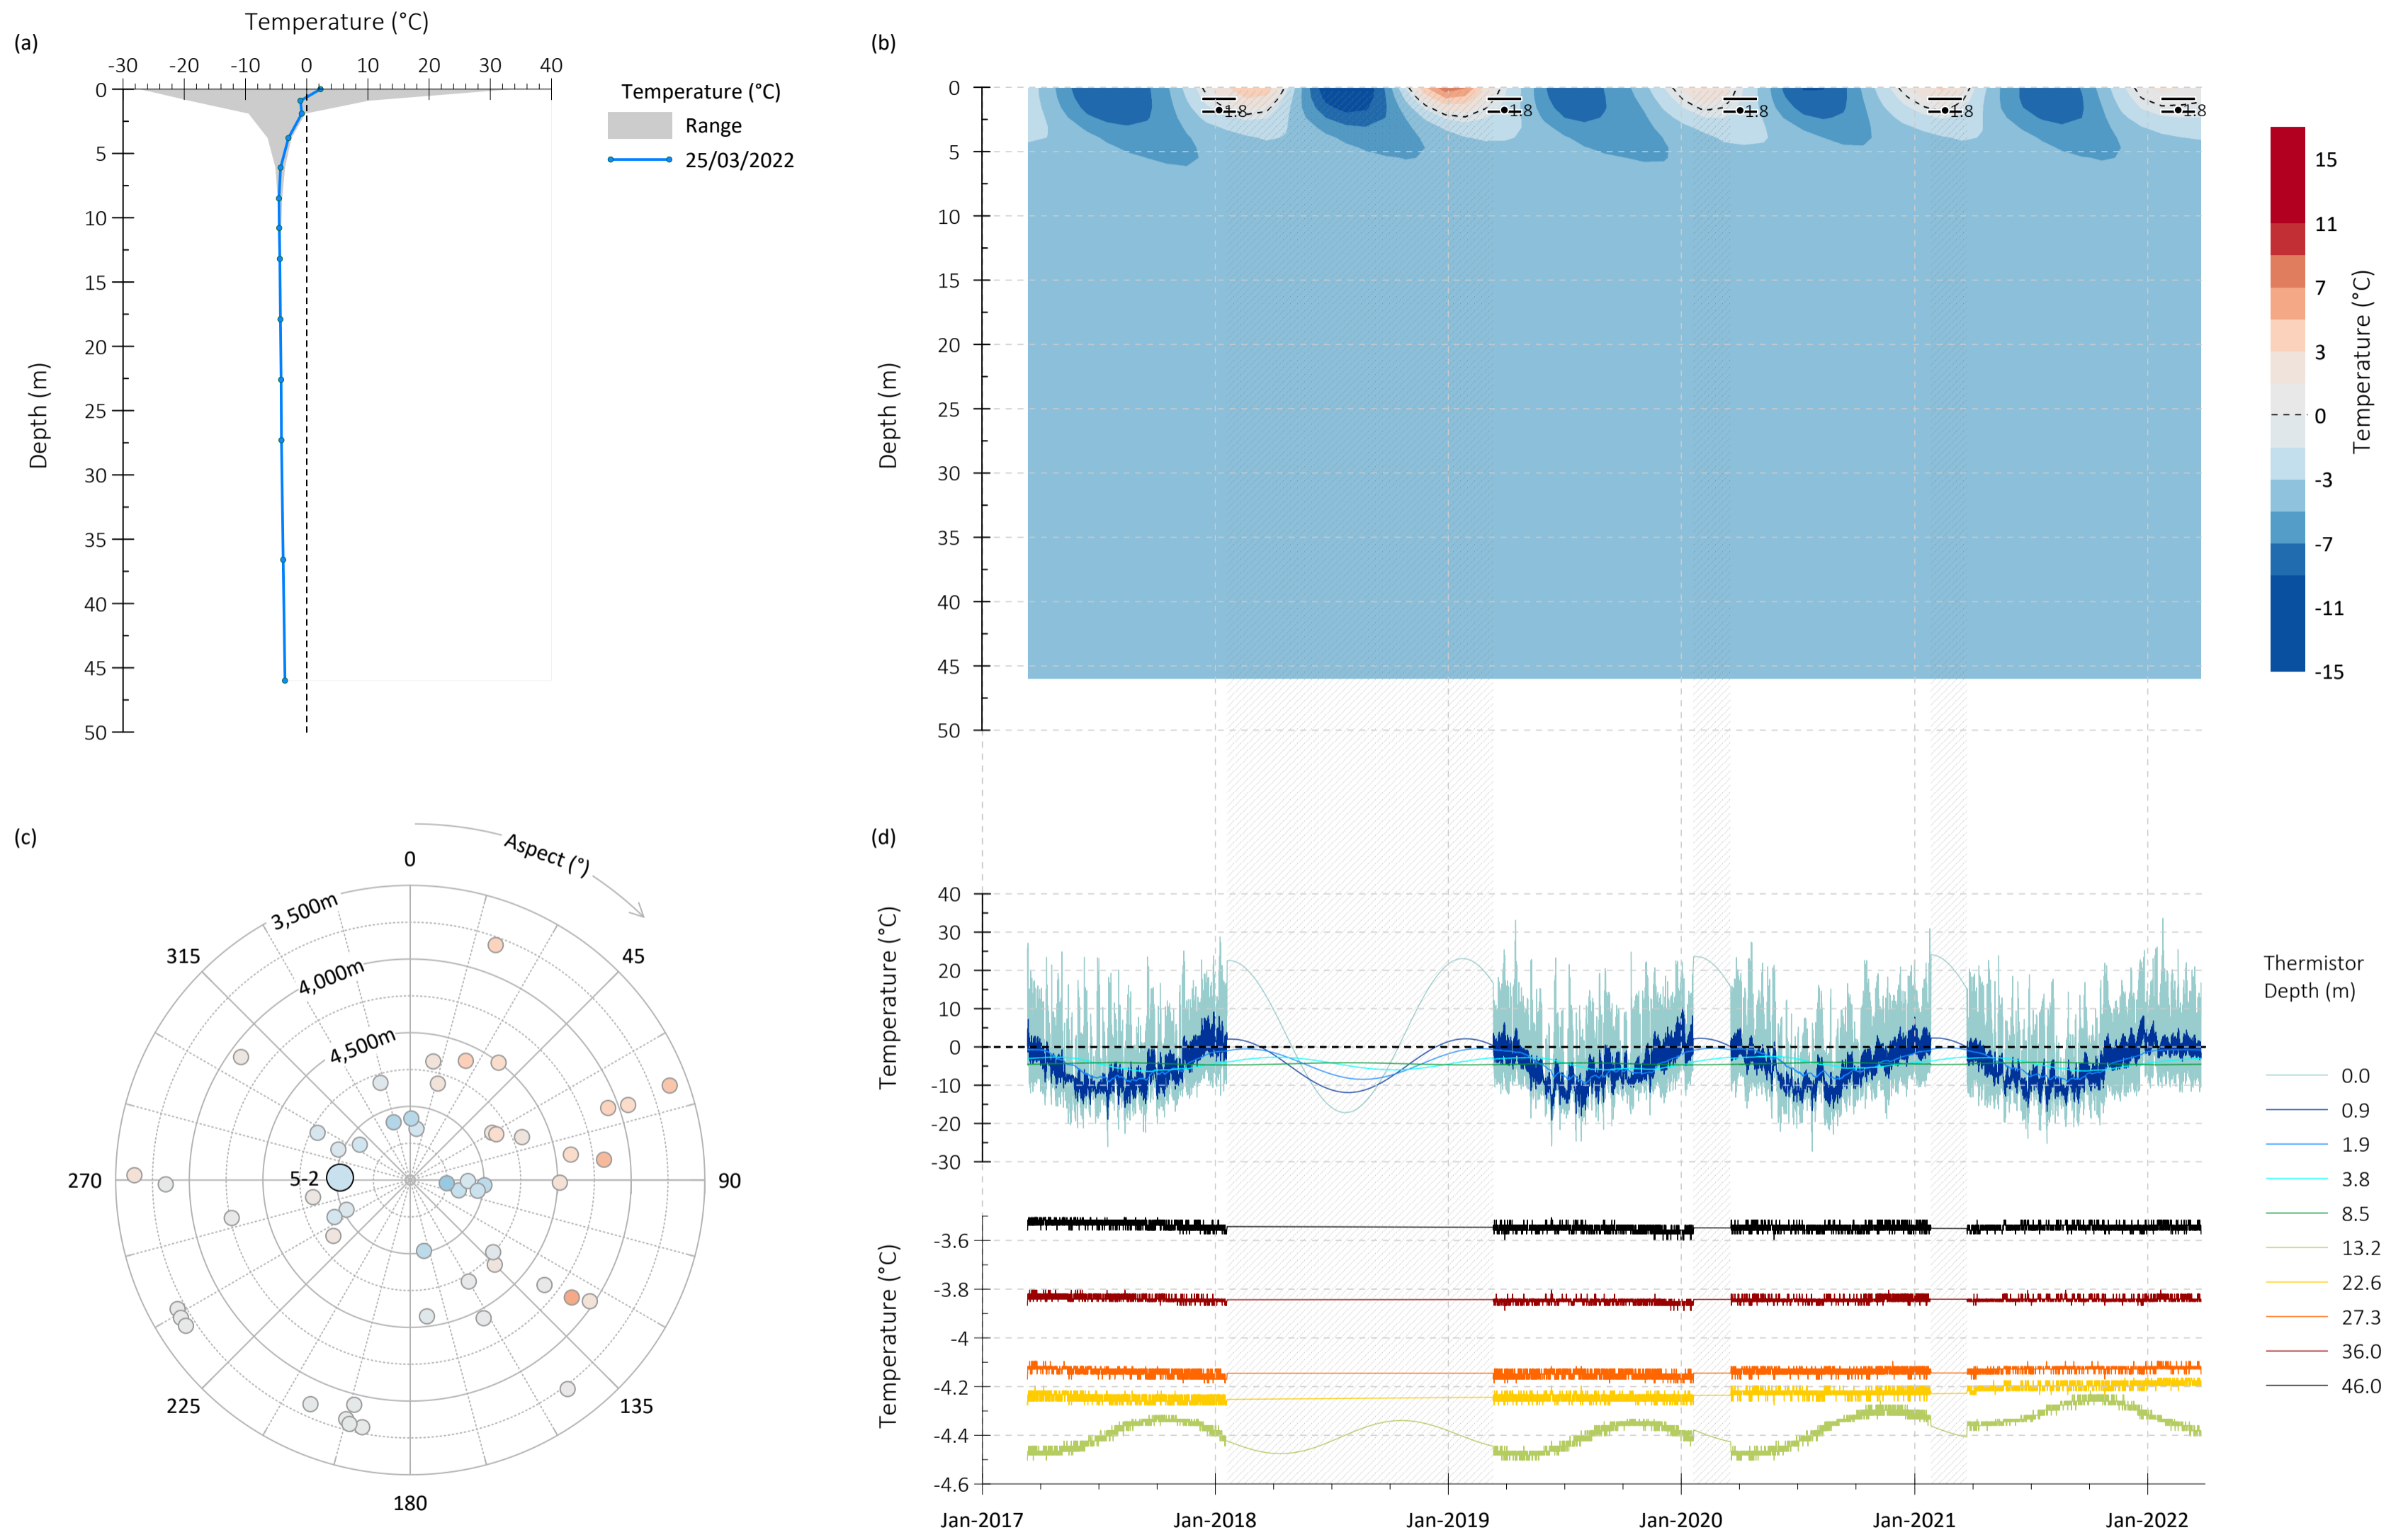

Figure S34: Ground thermal regime for Borehole 5-2 (El. = 5,023 m, Colluvium (thin veneer)). Measurements collected approximately every 6 hours between 12/03/2017 and 25/03/2022. Interpolated data indicated by grey hatched areas.

(a) Temperature depth profile. Range estimated using hourly raw data and interpolated values. Daily average of most recent available measurements shown in blue.

(b) Interpreted borehole temperature evolution with time. Contours estimated from hourly raw data and interpolated values. Active layer thickness indicated by black dots; horizontal lines indicate the depth of thermistors used for interpolation.

(c) Aspect-elevation-temperature diagram of most recent monthly temperatures below DZAA at all boreholes; colour scale same as plot (b). Borehole 5-2 ( $T = -4.18$  °C, depth = 22.6 m) is indicated by enlarged symbol.

(d) Raw temperature time-series for selected depths at Borehole 5-2. Full dataset includes measurements from 13 sensors. Daily interpolated values are also shown.

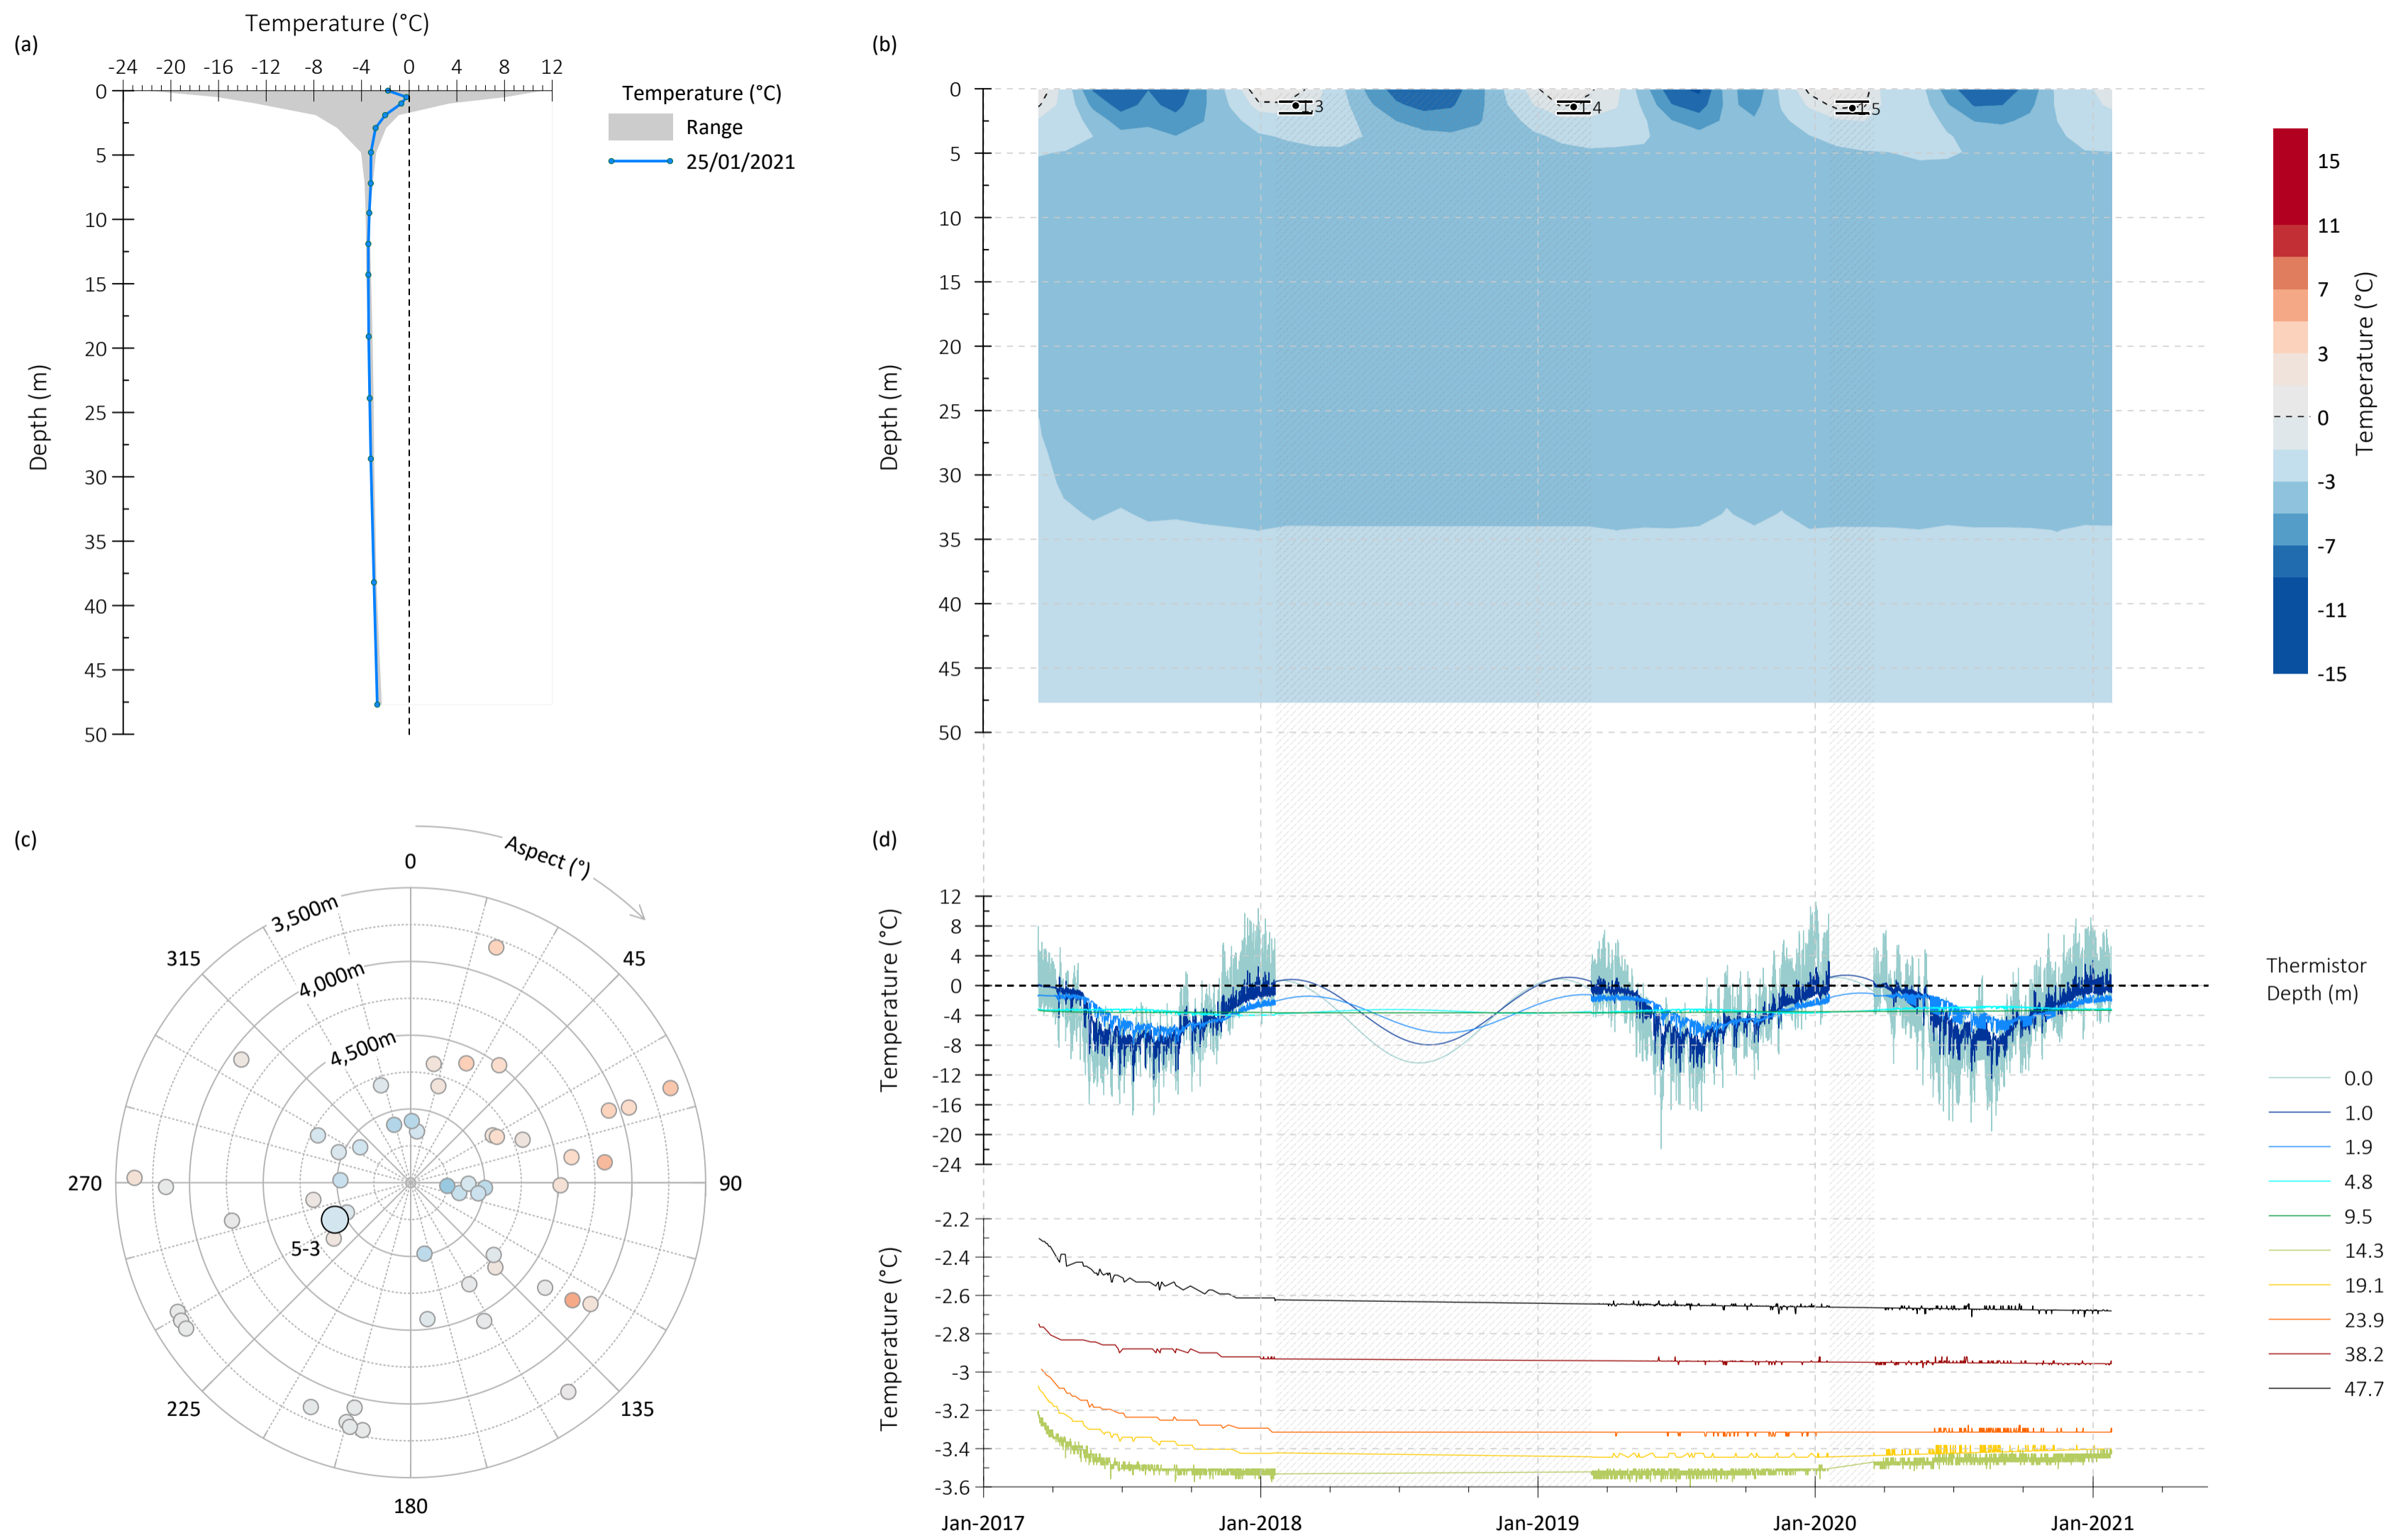

Figure S35: Ground thermal regime for Borehole 5-3 (El. = 4,928 m, Colluvium (thin veneer)). Measurements collected approximately every 4 hours between 13/03/2017 and 25/01/2021. Interpolated data indicated by grey hatched areas.

- (a) Temperature depth profile. Range estimated using hourly raw data and interpolated values. Daily average of most recent available measurements shown in blue.
- (b) Interpreted borehole temperature evolution with time. Contours estimated from hourly raw data and interpolated values. Active layer thickness indicated by black dots; horizontal lines indicate the depth of thermistors used for interpolation.
- (c) Aspect-elevation-temperature diagram of most recent monthly temperatures below DZAA at all boreholes; colour scale same as plot (b). Borehole 5-3 ( $T = -3.4$  °C, depth=19.1 m) is indicated by enlarged symbol.
- (d) Raw temperature time-series for selected depths at Borehole 5-3. Full dataset includes measurements from 15 sensors. Daily interpolated values are also shown.

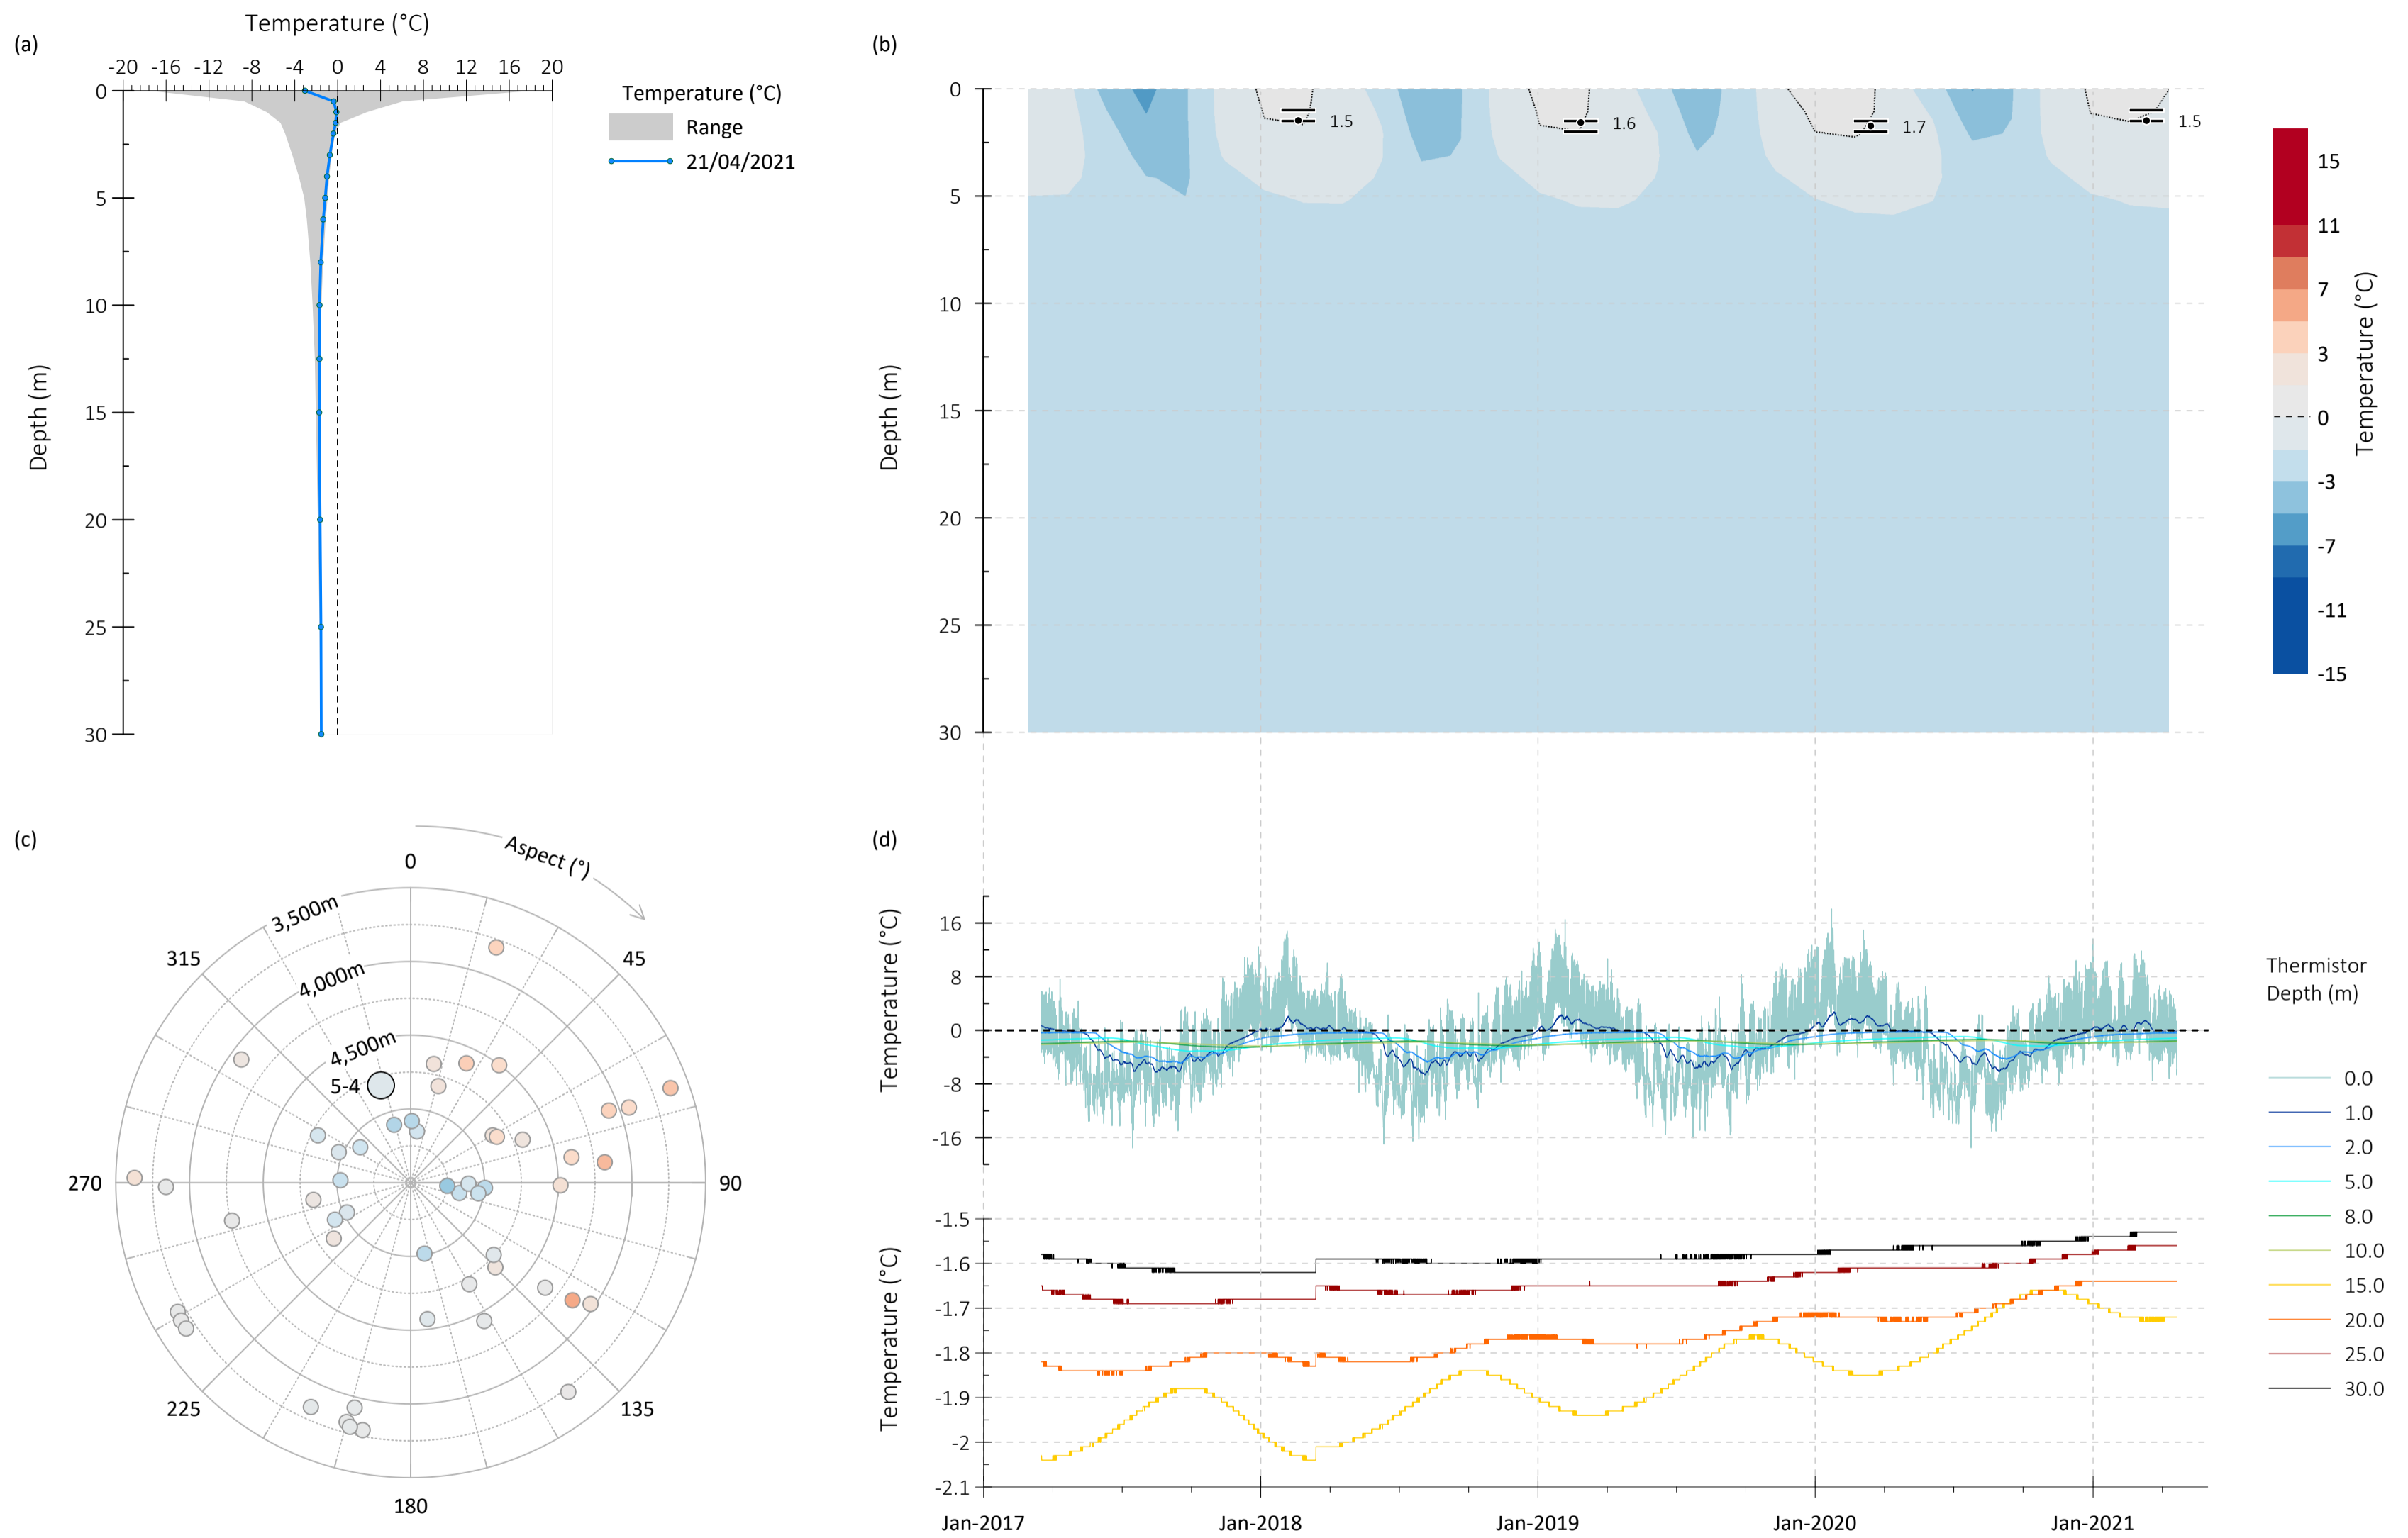

Figure S36: Ground thermal regime for Borehole 5-4 (El. = 4,810 m, highly weathered bedrock). Measurements collected approximately every 4 hours between 18/03/2017 and 21/04/2021.

(a) Temperature depth profile. Range estimated using hourly raw data. Daily average of most recent available measurements shown in blue.

(b) Interpreted borehole temperature evolution with time. Contours estimated from hourly raw data. Active layer thickness indicated by black dots; horizontal lines indicate the depth of thermistors used for interpolation.

(c) Aspect-elevation-temperature diagram of most recent monthly temperatures below DZAA at all boreholes; colour scale same as plot (b). Borehole 5-4 ( $T = -1.56$  °C, depth=25 m) is indicated by enlarged symbol.

(d) Raw temperature time-series for selected depths at Borehole 5-4. Full dataset includes measurements from 16 sensors.



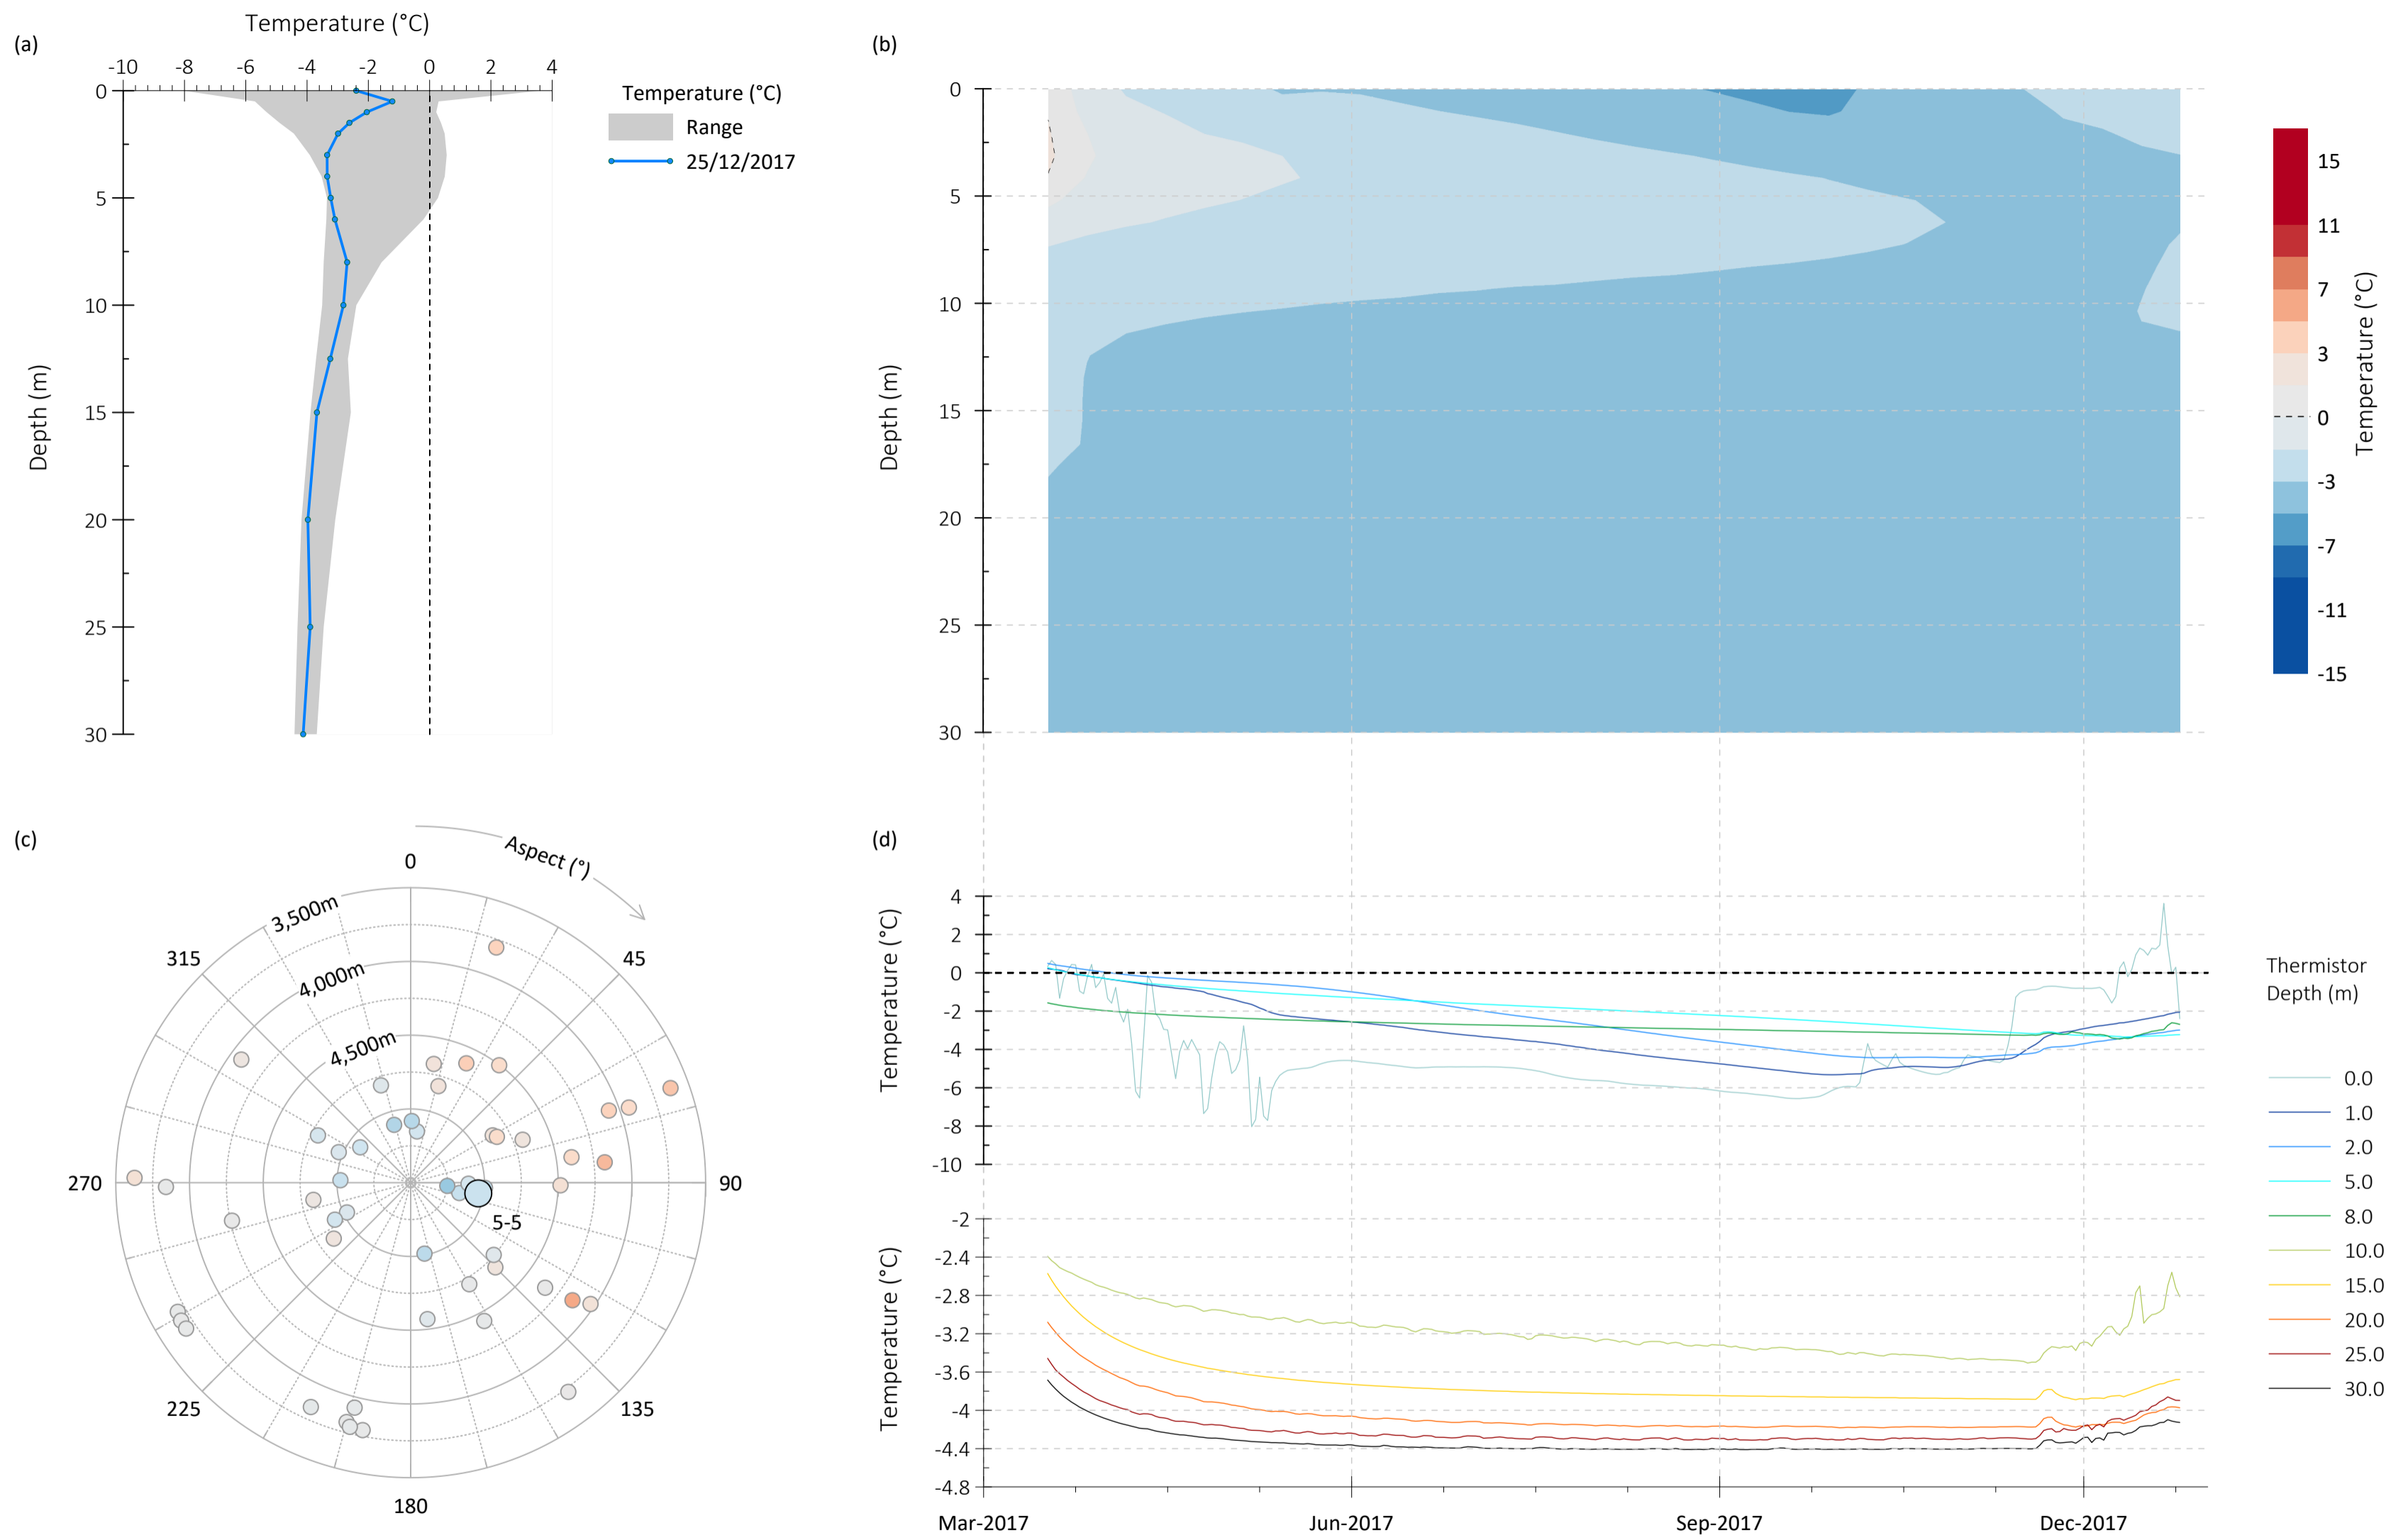

Figure S37: Ground thermal regime for Borehole 5-5 (El. = 5,036 m, Bedrock (weathered)). Daily measurements collected between 17/03/2017 and 25/12/2017.

(a) Temperature depth profile. Range estimated using daily raw data. Most recent available measurement shown in blue.

(b) Interpreted borehole temperature evolution with time. Contours estimated from daily raw data.

(c) Aspect-elevation-temperature diagram of most recent monthly temperatures below DZAA at all boreholes; colour scale same as plot (b). Borehole 5-5 ( $T = -4.08$  °C, depth=20 m) is indicated by enlarged symbol.

(d) Raw temperature time-series for selected depths at Borehole 5-5. Full dataset includes measurements from 16 sensors.

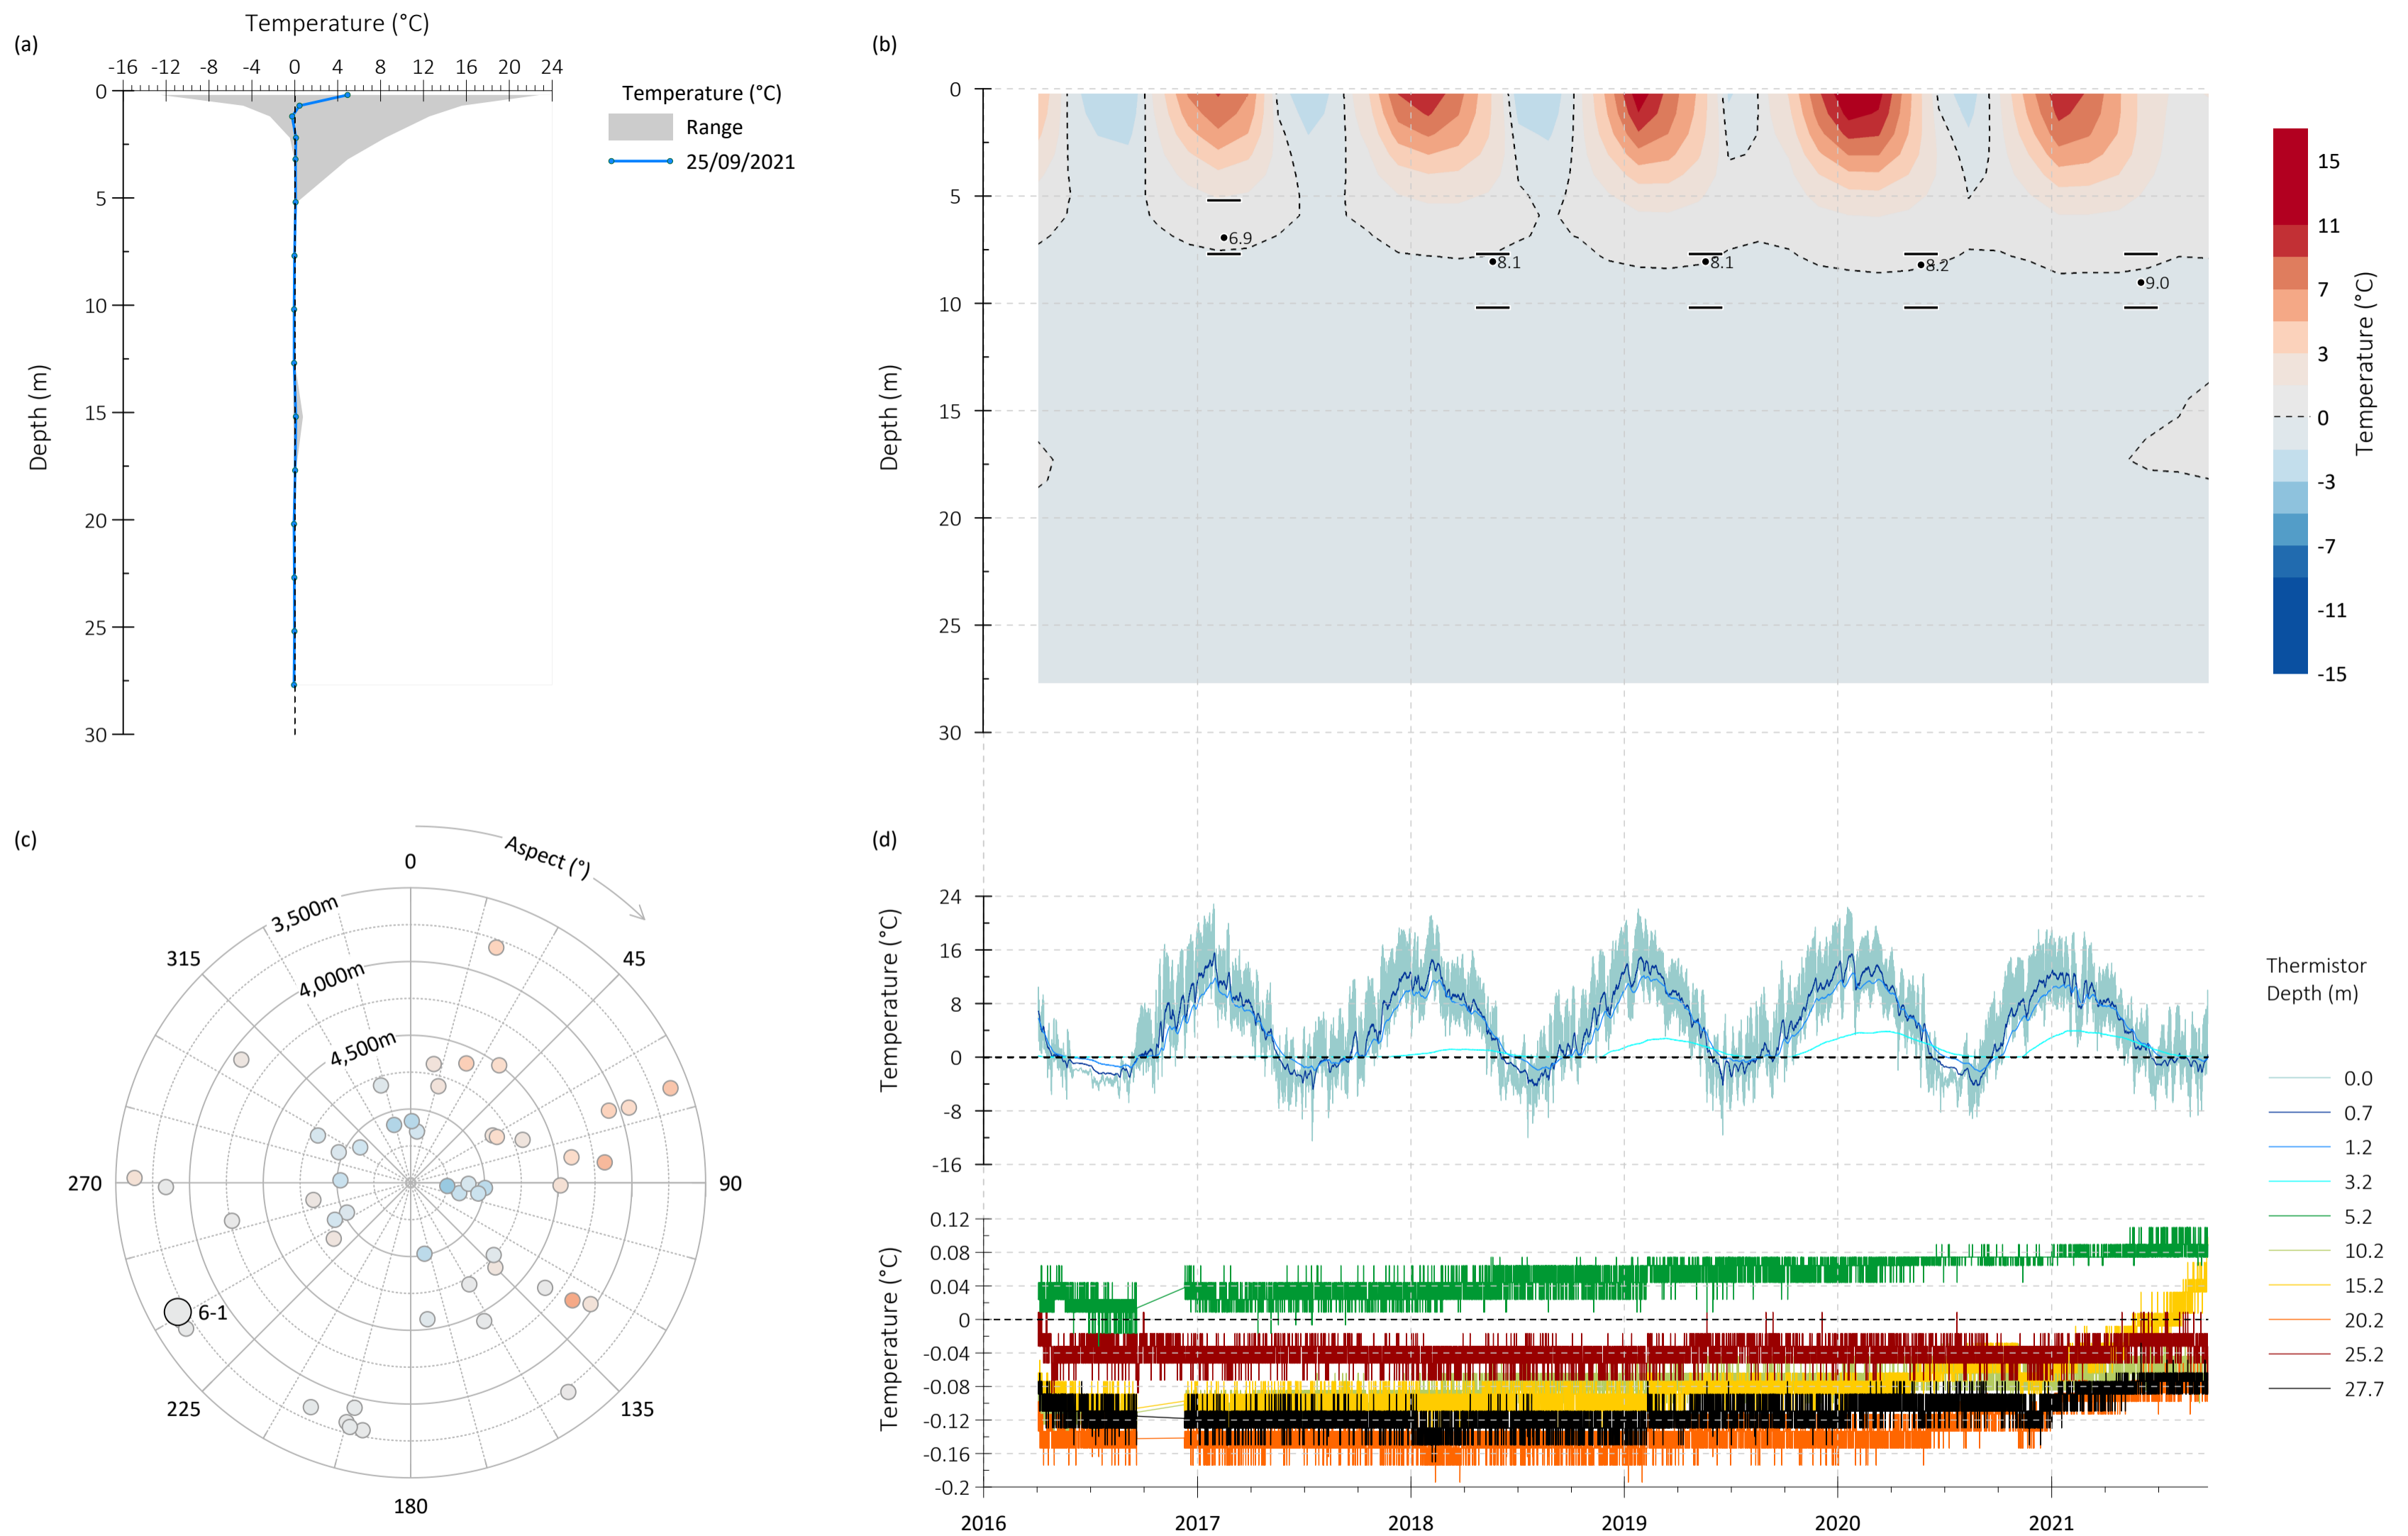

Figure S38: Ground thermal regime for Borehole 6-1 (El. = 3,694 m, Active Rock Glacier). Measurements collected approximately every 6 hours between 03/04/2016 and 25/09/2021.

(a) Temperature depth profile. Range estimated using hourly raw data. Daily average of most recent available measurements shown in blue.

(b) Interpreted borehole temperature evolution with time. Contours estimated from hourly raw data. Depth to permafrost table indicated by black dots; horizontal lines indicate the depth of thermistors used for interpolation.

(c) Aspect-elevation-temperature diagram of most recent monthly temperatures below DZAA at all boreholes; colour scale same as plot (b). Borehole 6-1 ( $T = -0.08$  °C, depth=20.2 m) is indicated by enlarged symbol.

(d) Raw temperature time-series for selected depths at Borehole 6-1. Full dataset includes measurements from 15 sensors.

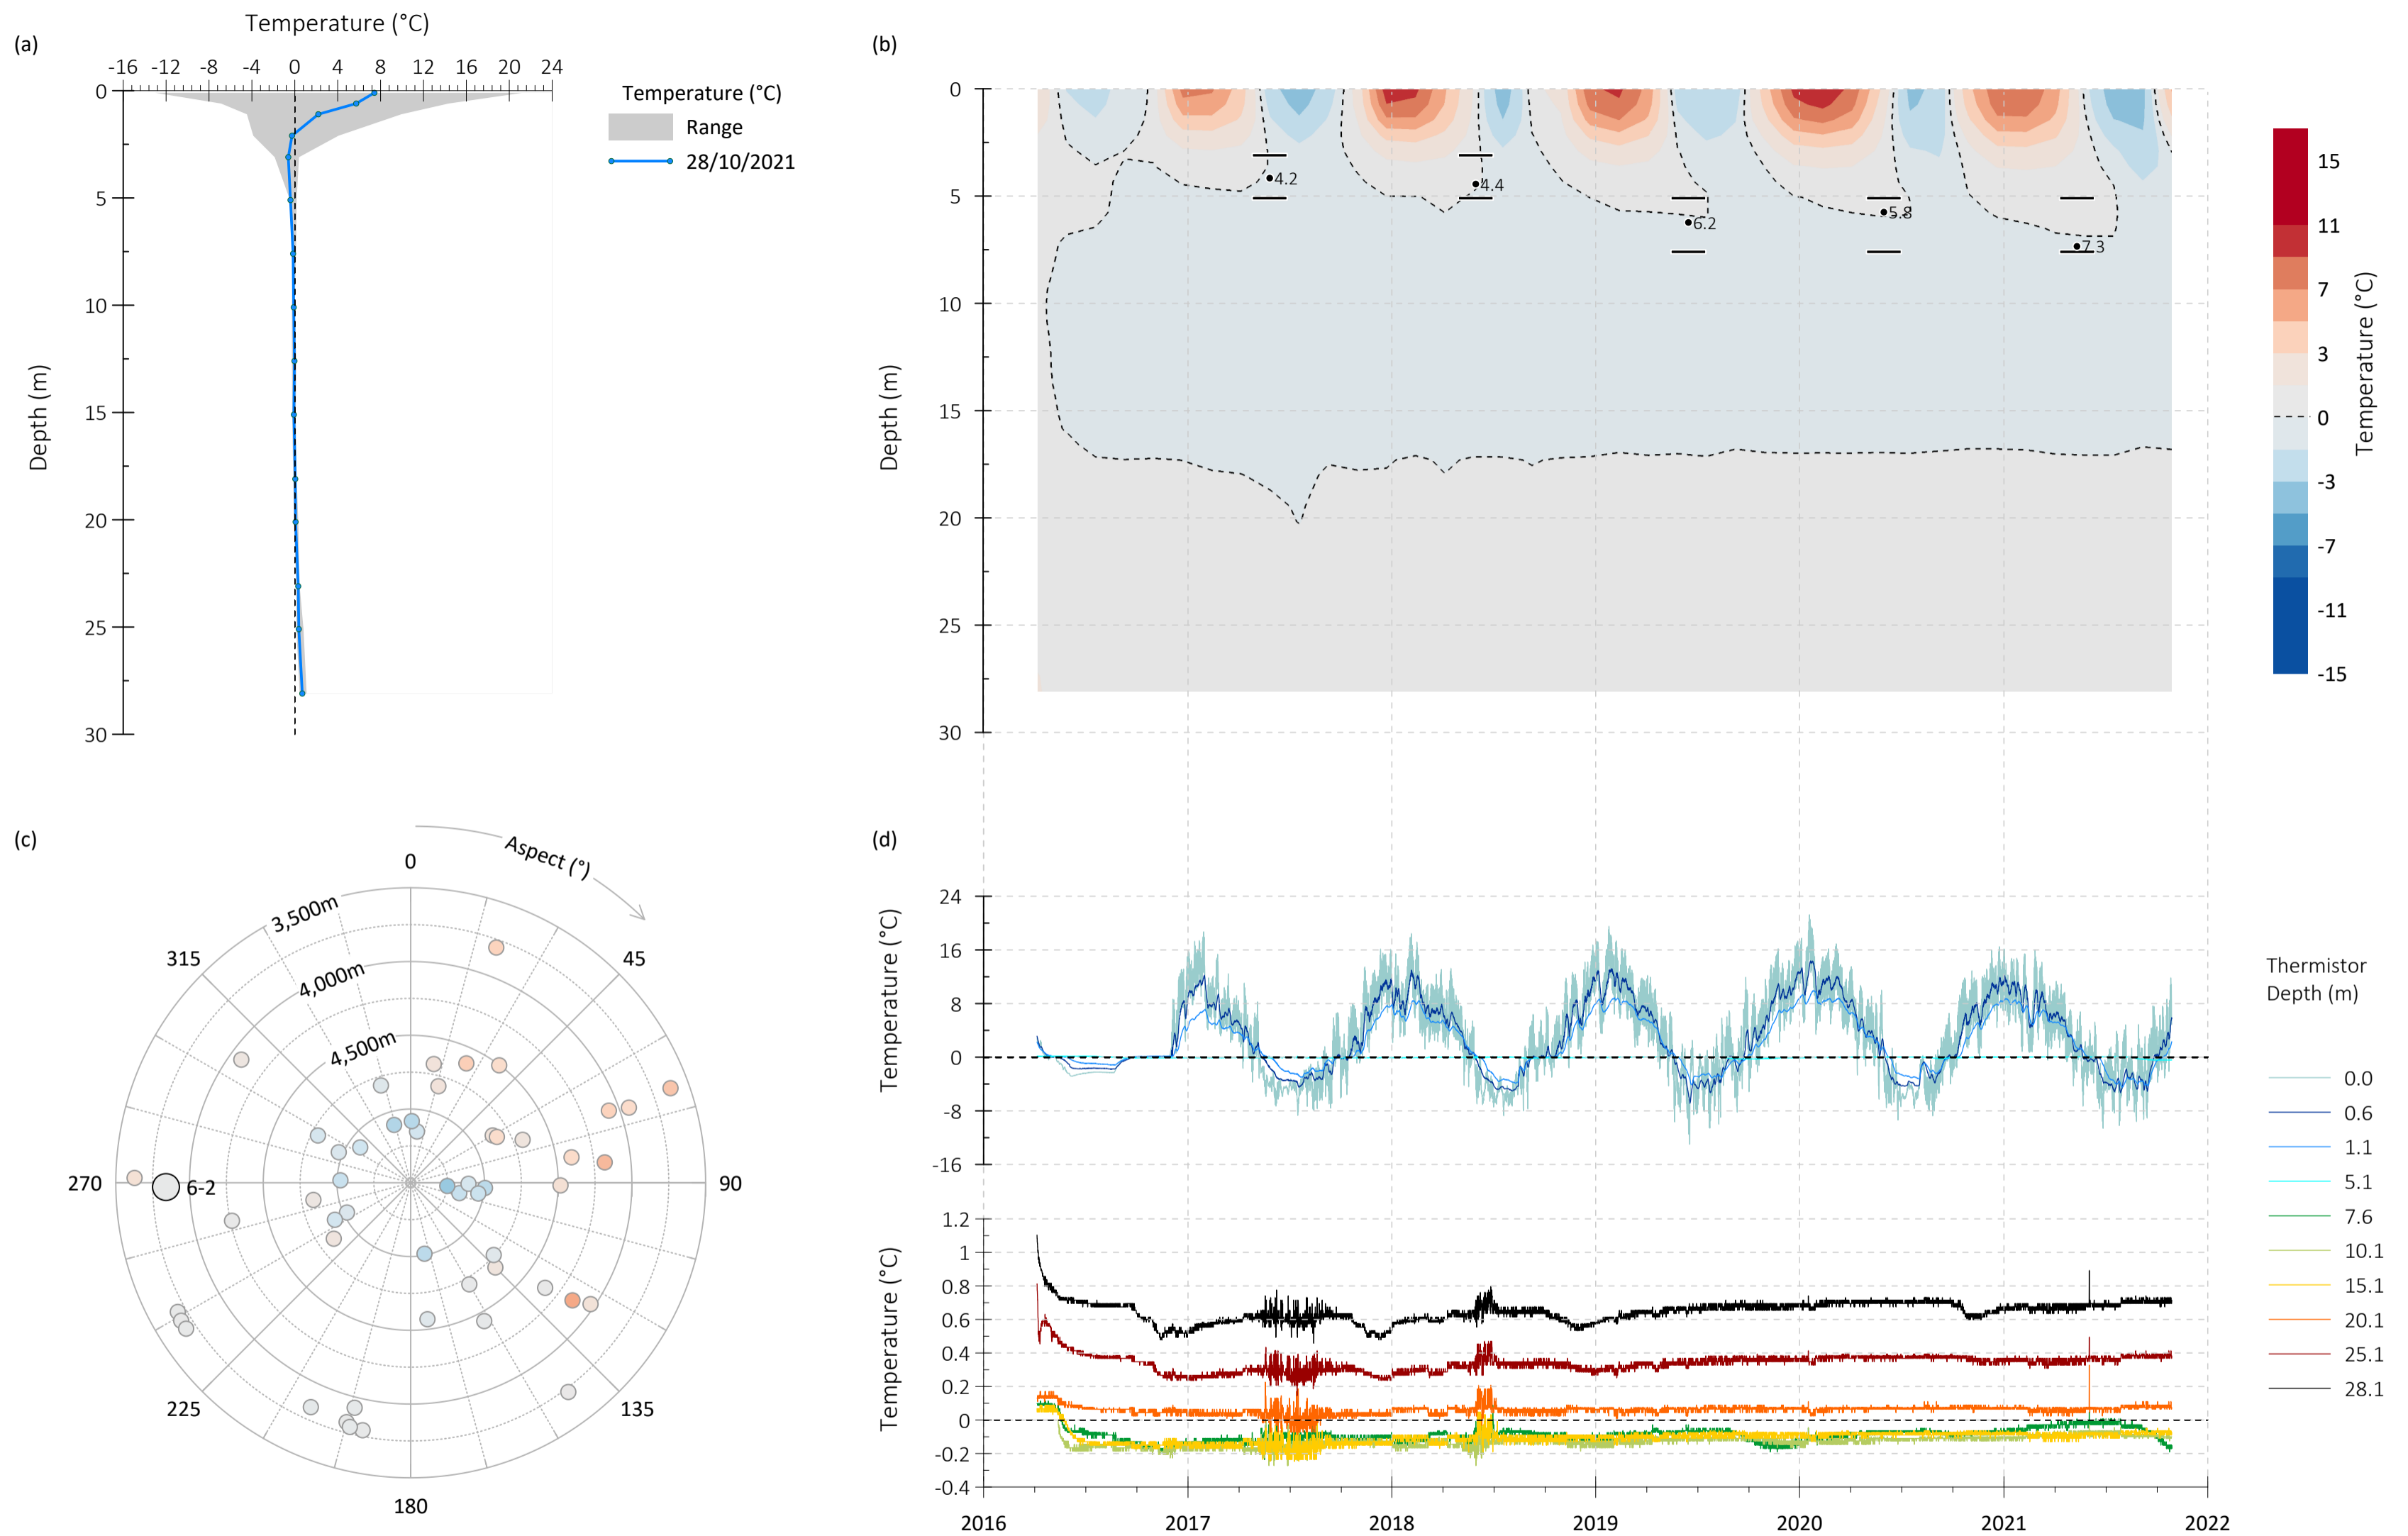

Figure S39: Ground thermal regime for Borehole 6-2 (El. = 3,840 m, Active Rock Glacier). Measurements collected approximately every 6 hours between 05/04/2016 and 28/10/2021.

(a) Temperature depth profile. Range estimated using hourly raw data. Daily average of most recent available measurements shown in blue.

(b) Interpreted borehole temperature evolution with time. Contours estimated from hourly raw data. Depth to permafrost table indicated by black dots; horizontal lines indicate the depth of thermistors used for interpolation.

(c) Aspect-elevation-temperature diagram of most recent monthly temperatures below DZAA at all boreholes; colour scale same as plot (b). Borehole 6-2 ( $T = -0.1$  °C, depth=10.1 m) is indicated by enlarged symbol.

(d) Raw temperature time-series for selected depths at Borehole 6-2. Full dataset includes measurements from 15 sensors.

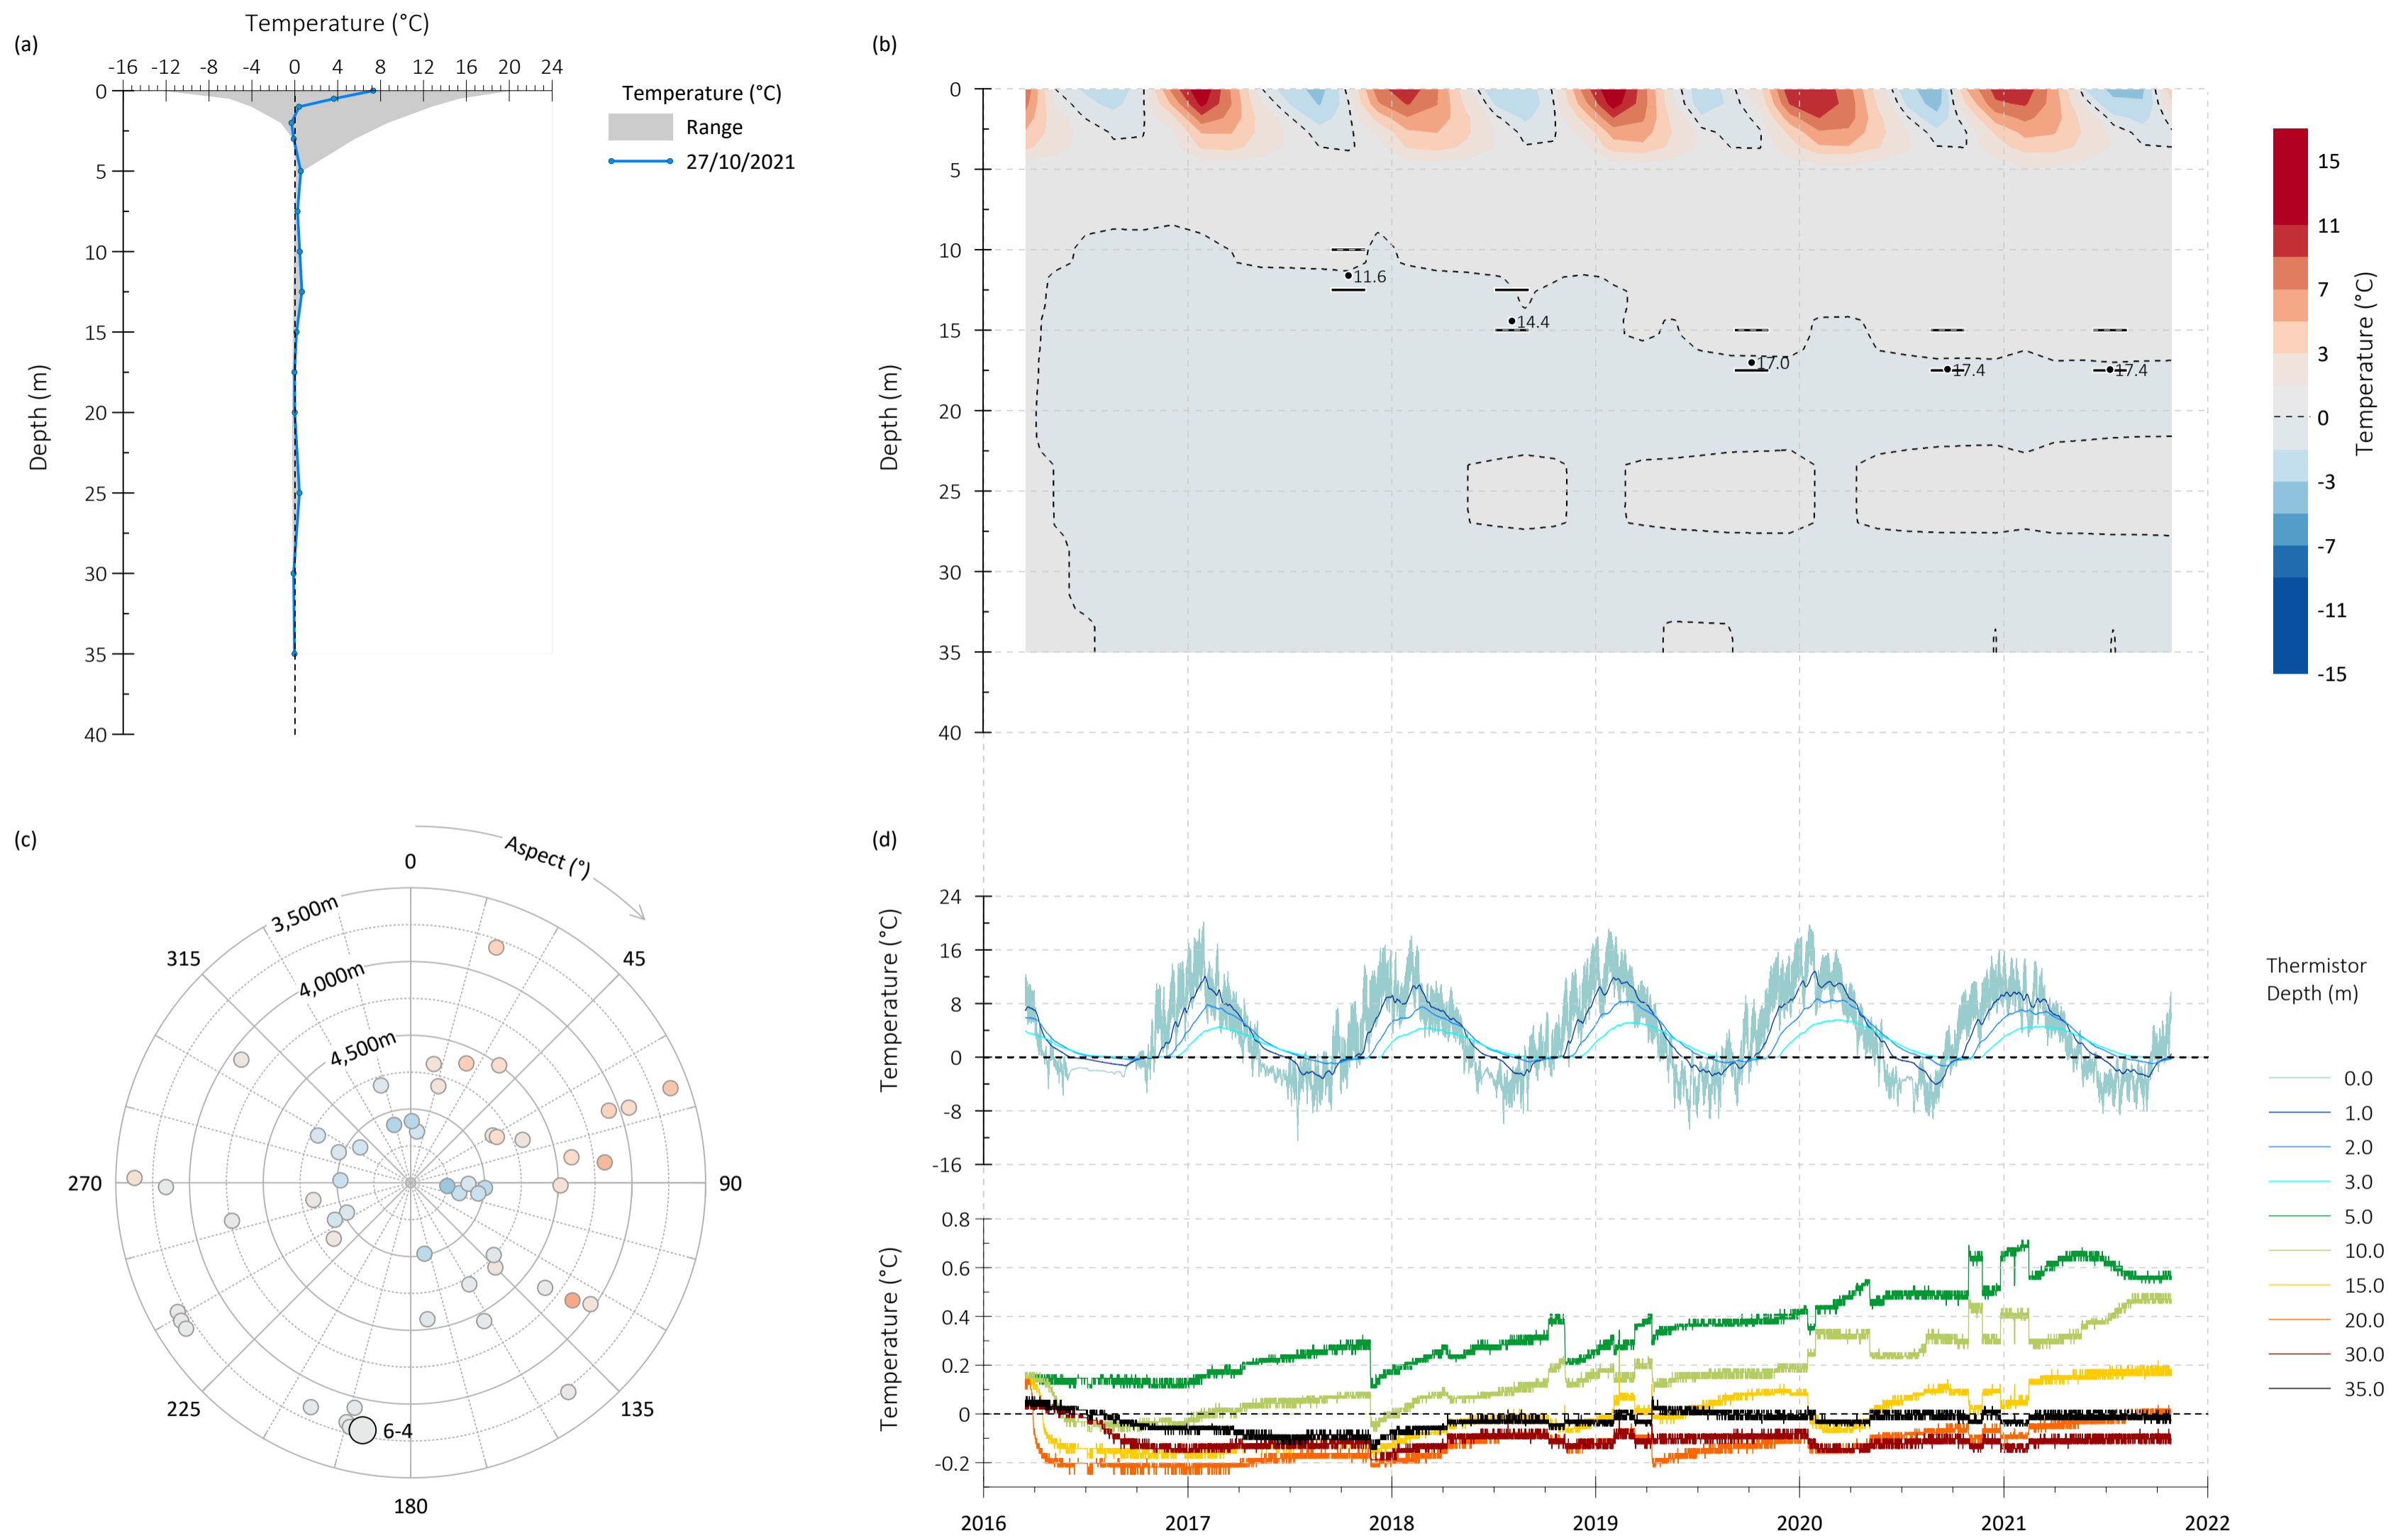

Figure S40: Ground thermal regime for Borehole 6-4 (El. = 3,791 m, Rock Glacier). Measurements collected approximately every 6 hours between 15/03/2016 and 27/10/2021.

(a) Temperature depth profile. Range estimated using hourly raw data. Daily average of most recent available measurements shown in blue.

(b) Interpreted borehole temperature evolution with time. Contours estimated from hourly raw data. Depth to permafrost table indicated by black dots; horizontal lines indicate the depth of thermistors used for interpolation.

(c) Aspect-elevation-temperature diagram of most recent monthly temperatures below DZAA at all boreholes; colour scale same as plot (b). Borehole 6-4 ( $T = -0.1$  °C, depth=30 m) is indicated by enlarged symbol.

(d) Raw temperature time-series for selected depths at Borehole 6-4. Full dataset includes measurements from 15 sensors.

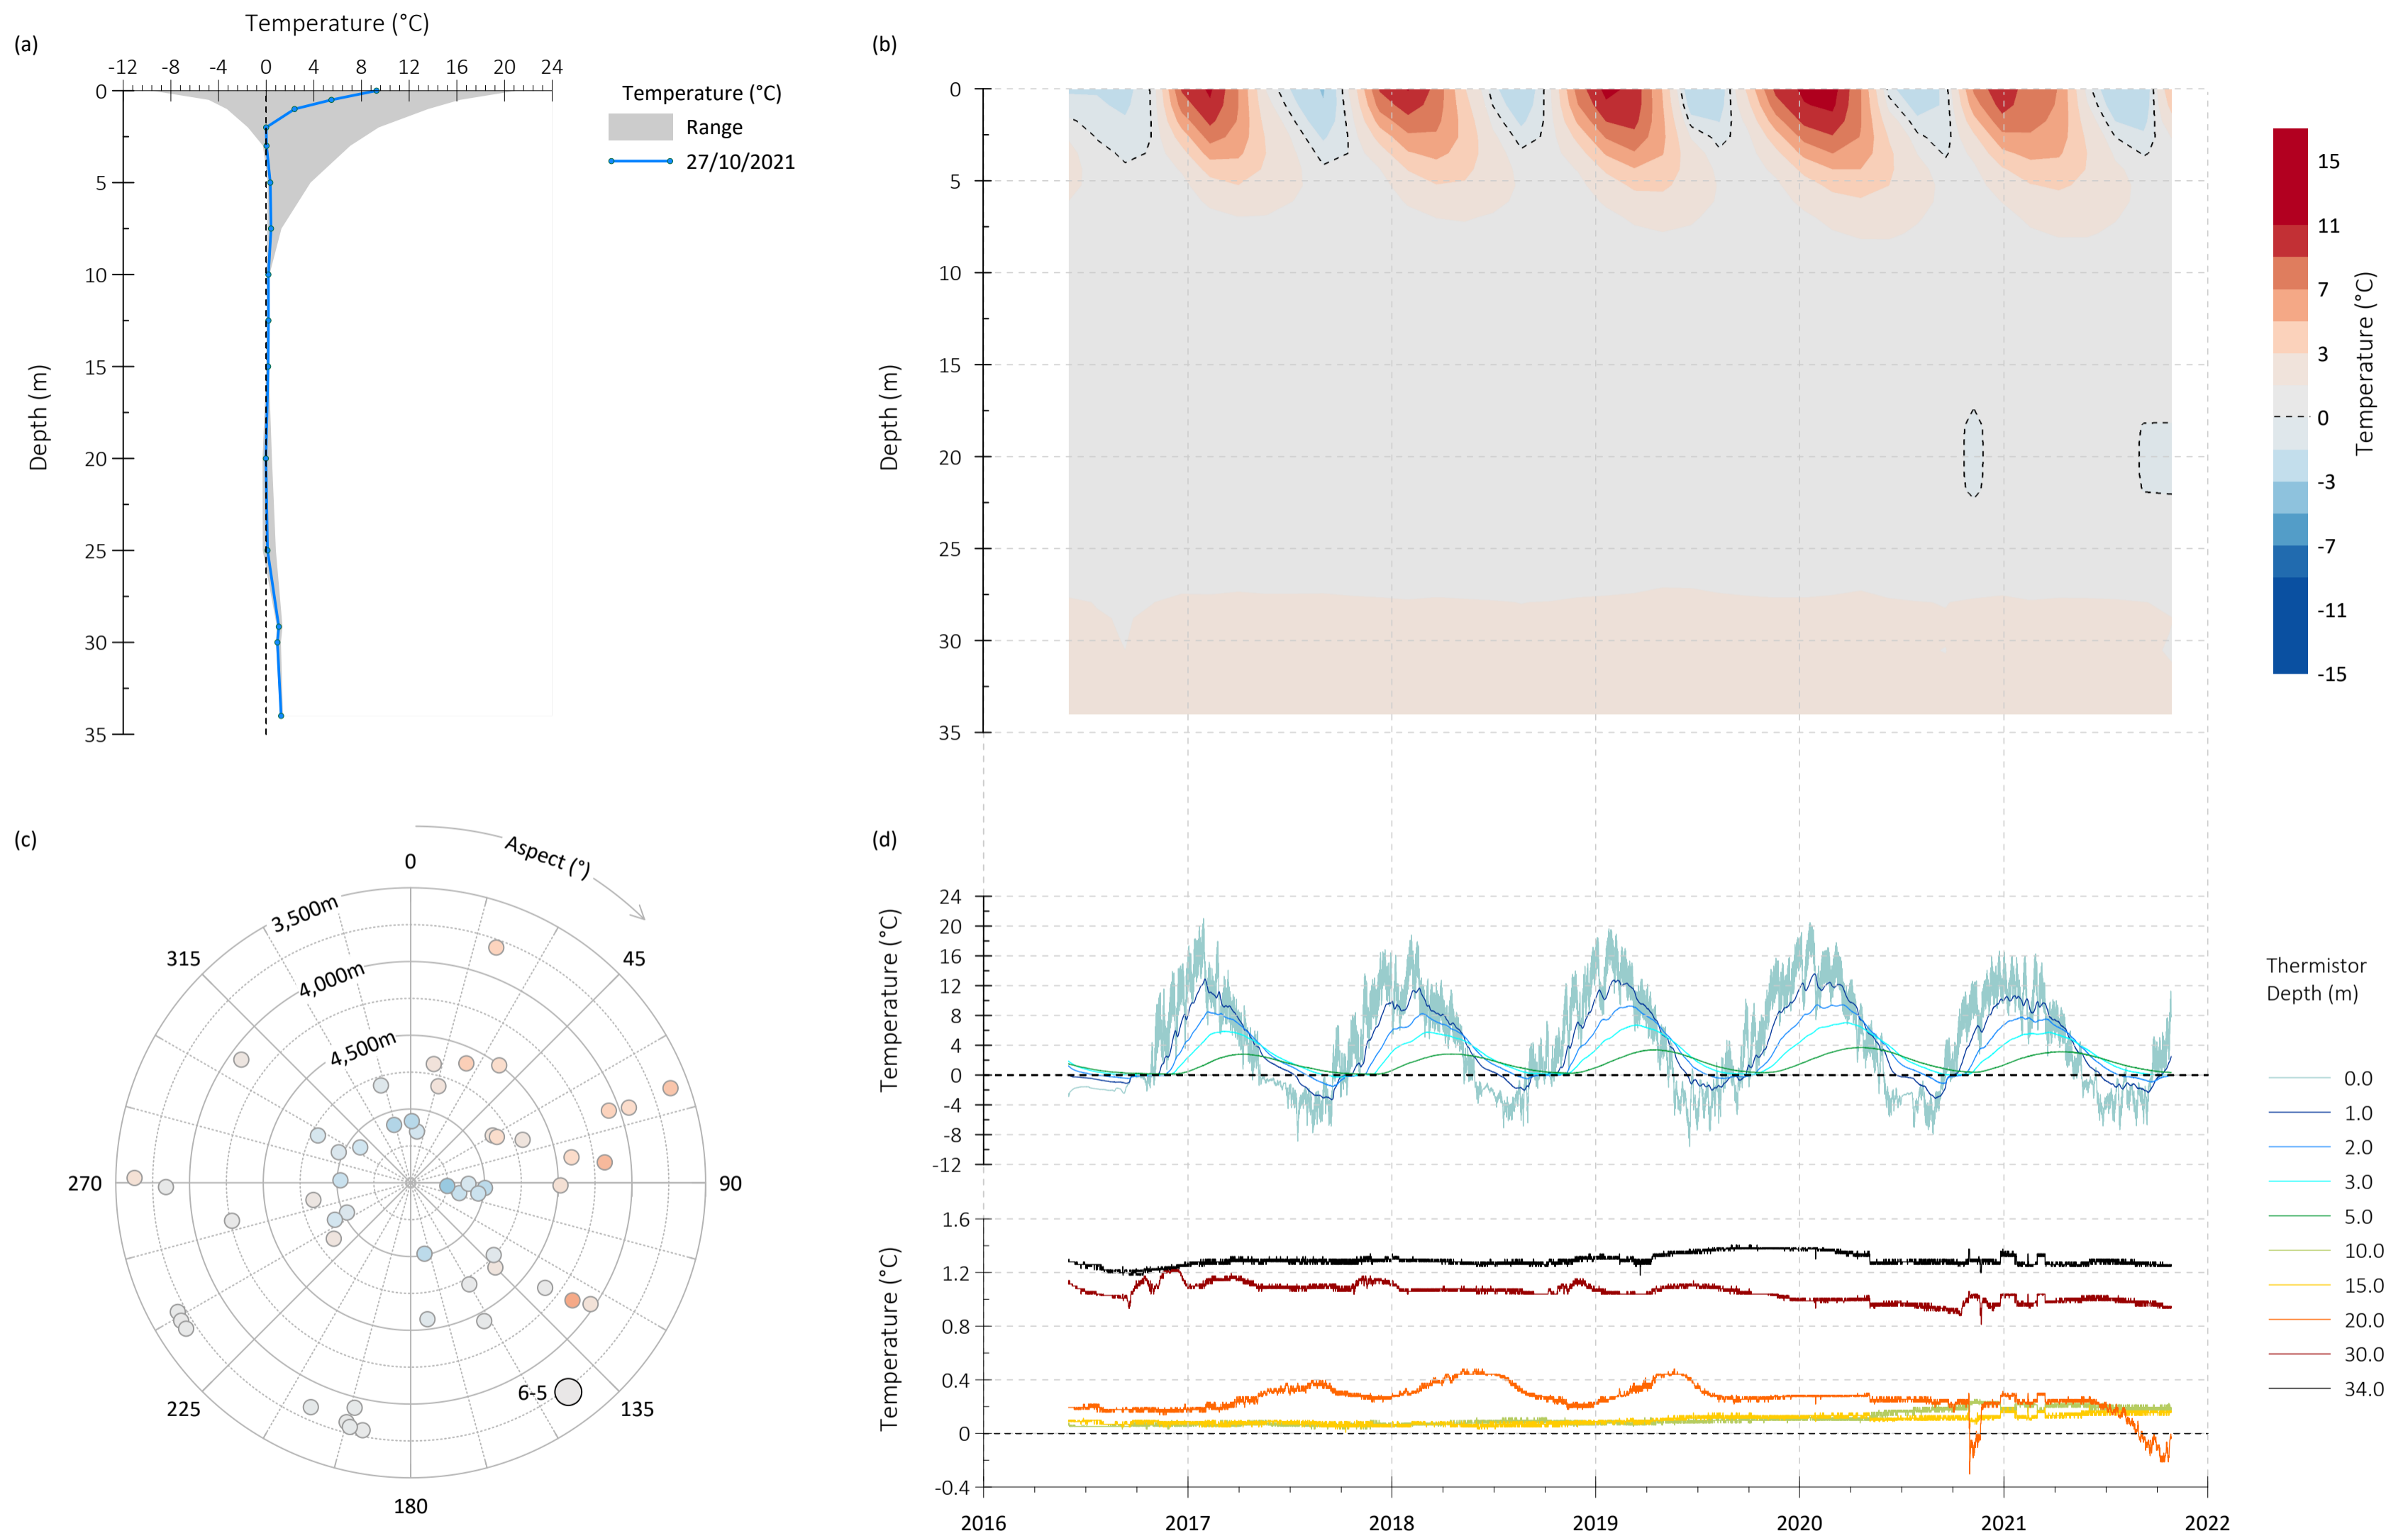

Figure S41: Ground thermal regime for Borehole 6-5 (El. = 3,724 m, Rock Glacier). Measurements collected approximately every 6 hours between 01/06/2016 and 27/10/2021.

(a) Temperature depth profile. Range estimated using hourly raw data. Daily average of most recent available measurements shown in blue.

(b) Interpreted borehole temperature evolution with time. Contours estimated from hourly raw data.

(c) Aspect-elevation-temperature diagram of most recent monthly temperatures below DZAA at all boreholes; colour scale same as plot (b). Borehole 6-5 ( $T = 0.16$  °C, depth = 15 m) is indicated by enlarged symbol.

(d) Raw temperature time-series for selected depths at Borehole 6-5. Full dataset includes measurements from 15 sensors.

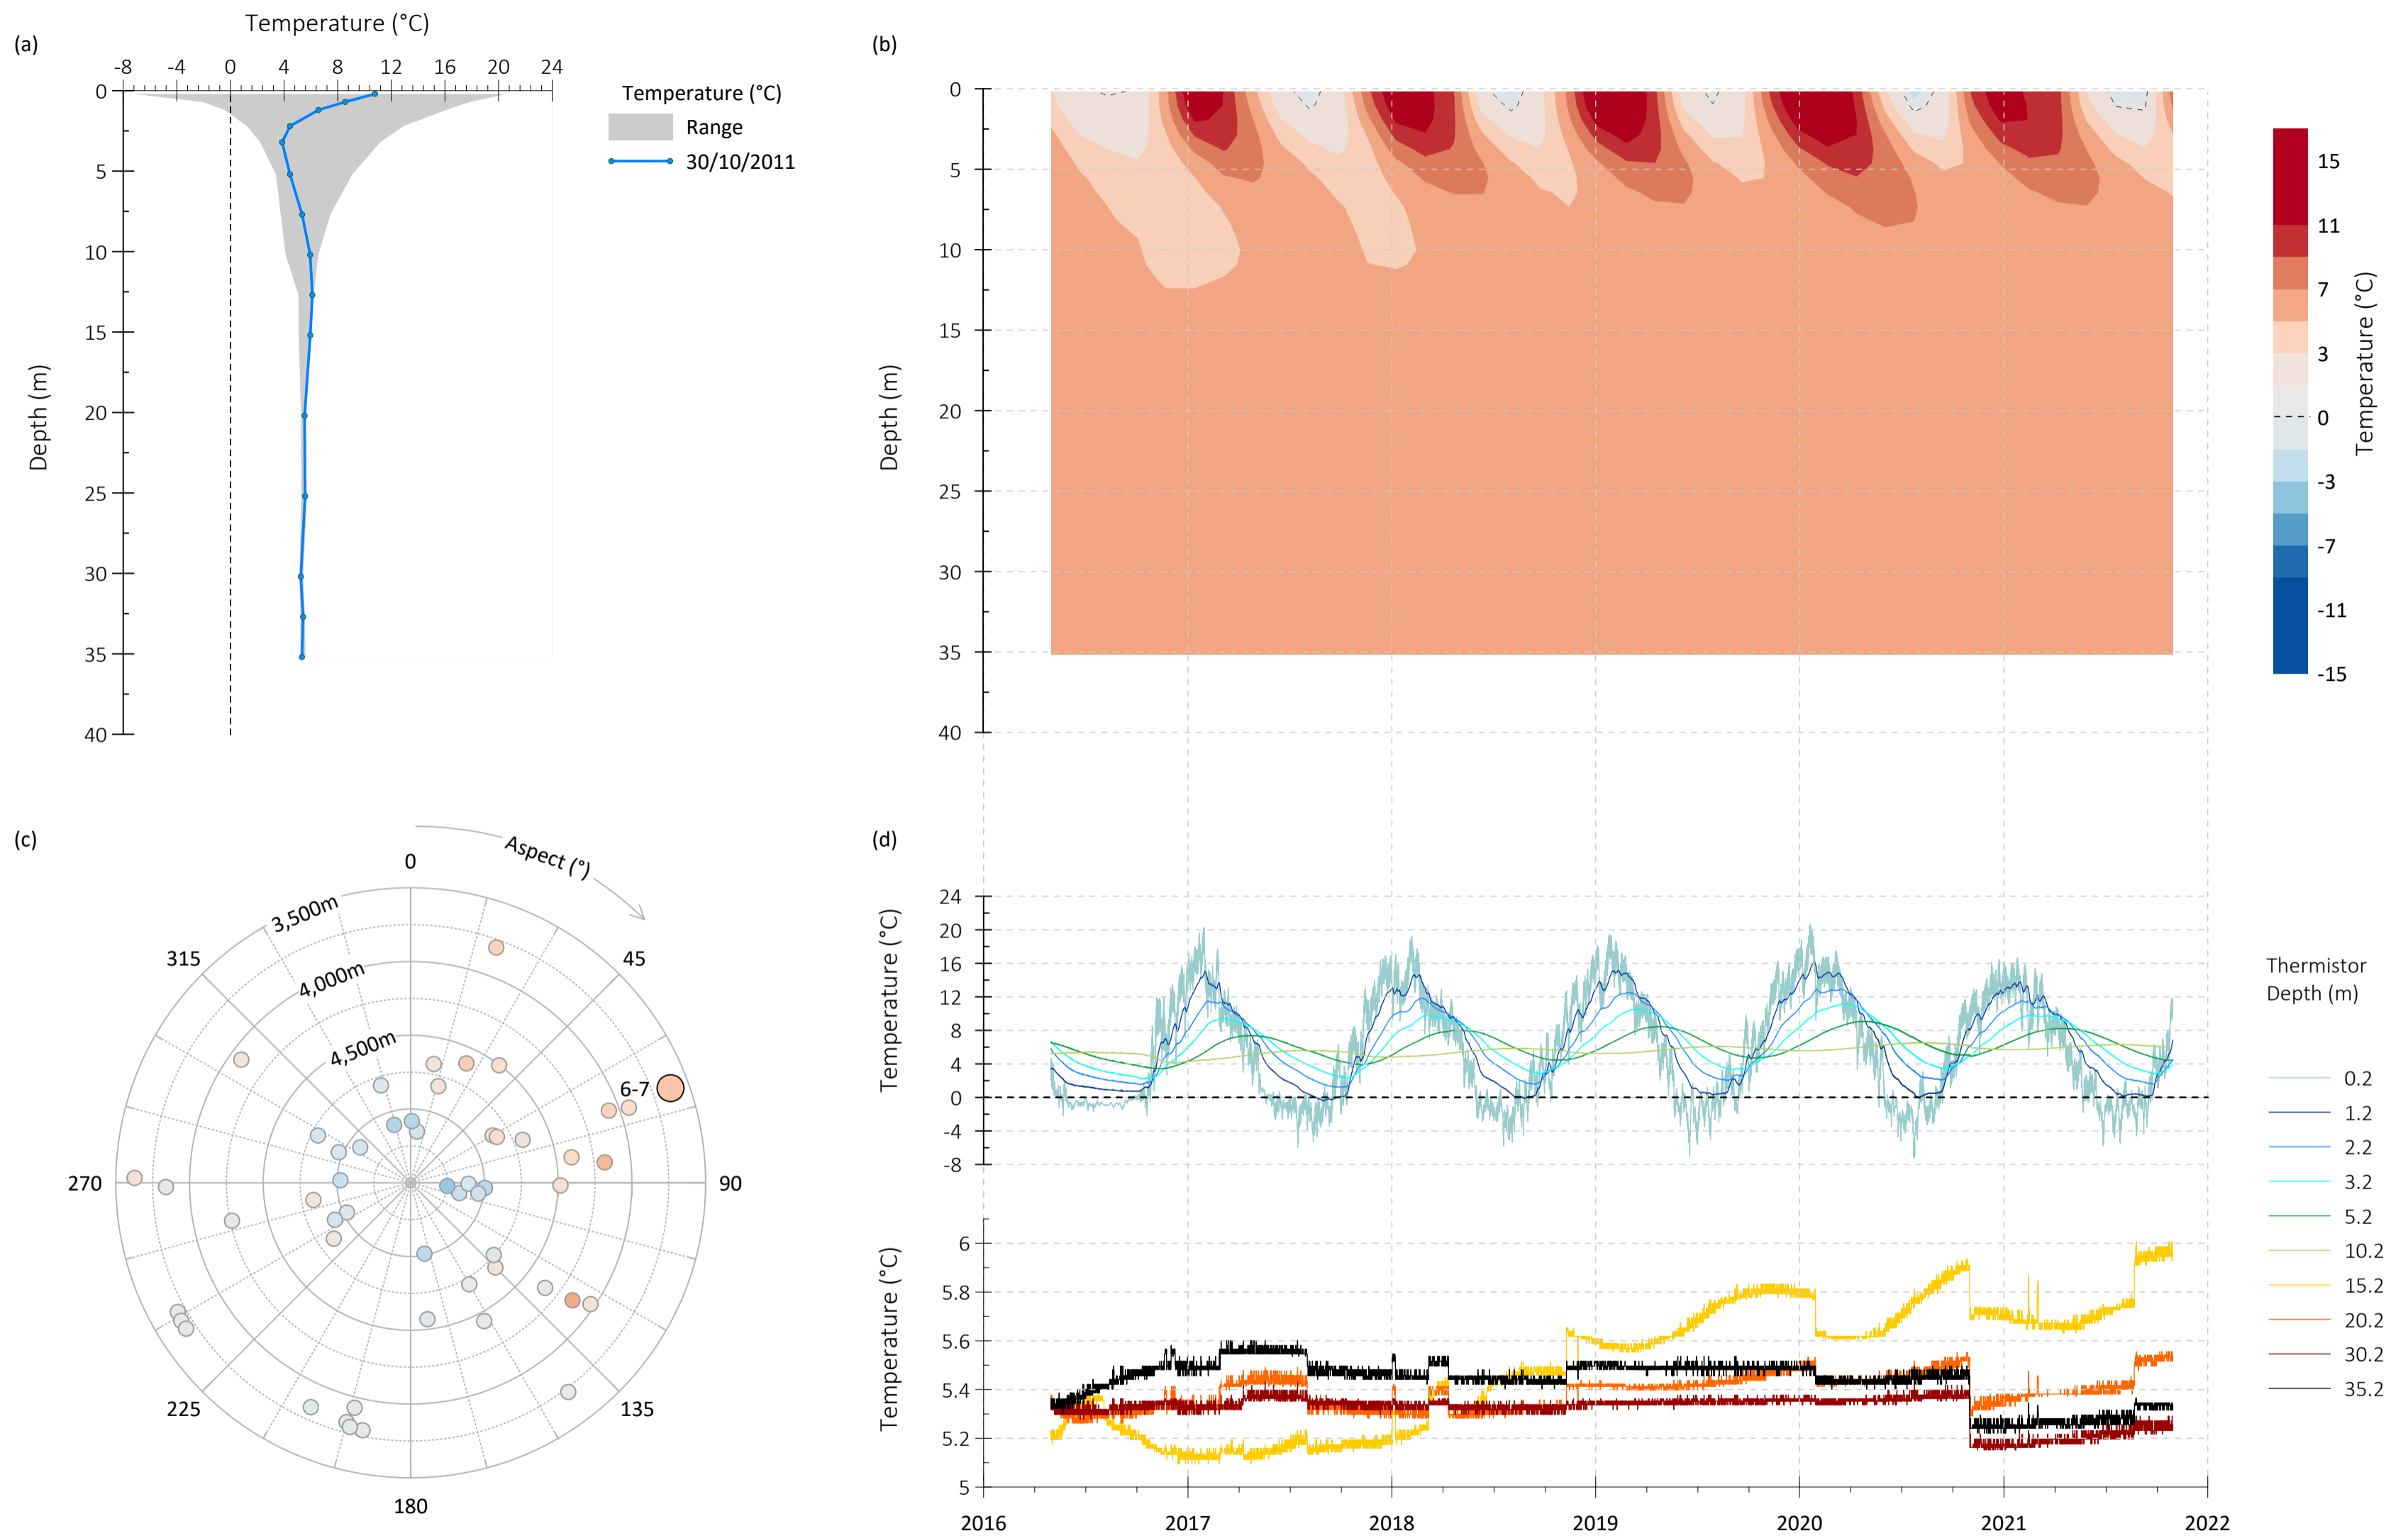

Figure S42: Ground thermal regime for Borehole 6-7 (El. = 3,625 m, Glacial Deposits). Measurements collected approximately every 4 hours between 30/04/2016 and 30/10/2021.

(a) Temperature depth profile. Range estimated using hourly raw data. Daily average of most recent available measurements shown in blue.

(b) Interpreted borehole temperature evolution with time. Contours estimated from hourly raw data.

(c) Aspect-elevation-temperature diagram of most recent monthly temperatures below DZAA at all boreholes; colour scale same as plot (b). Borehole 6-7 ( $T = 5.45\text{ }^{\circ}\text{C}$ , depth = 20.2 m) is indicated by enlarged symbol.

(d) Raw temperature time-series for selected depths at Borehole 6-7. Full dataset includes measurements from 15 sensors.

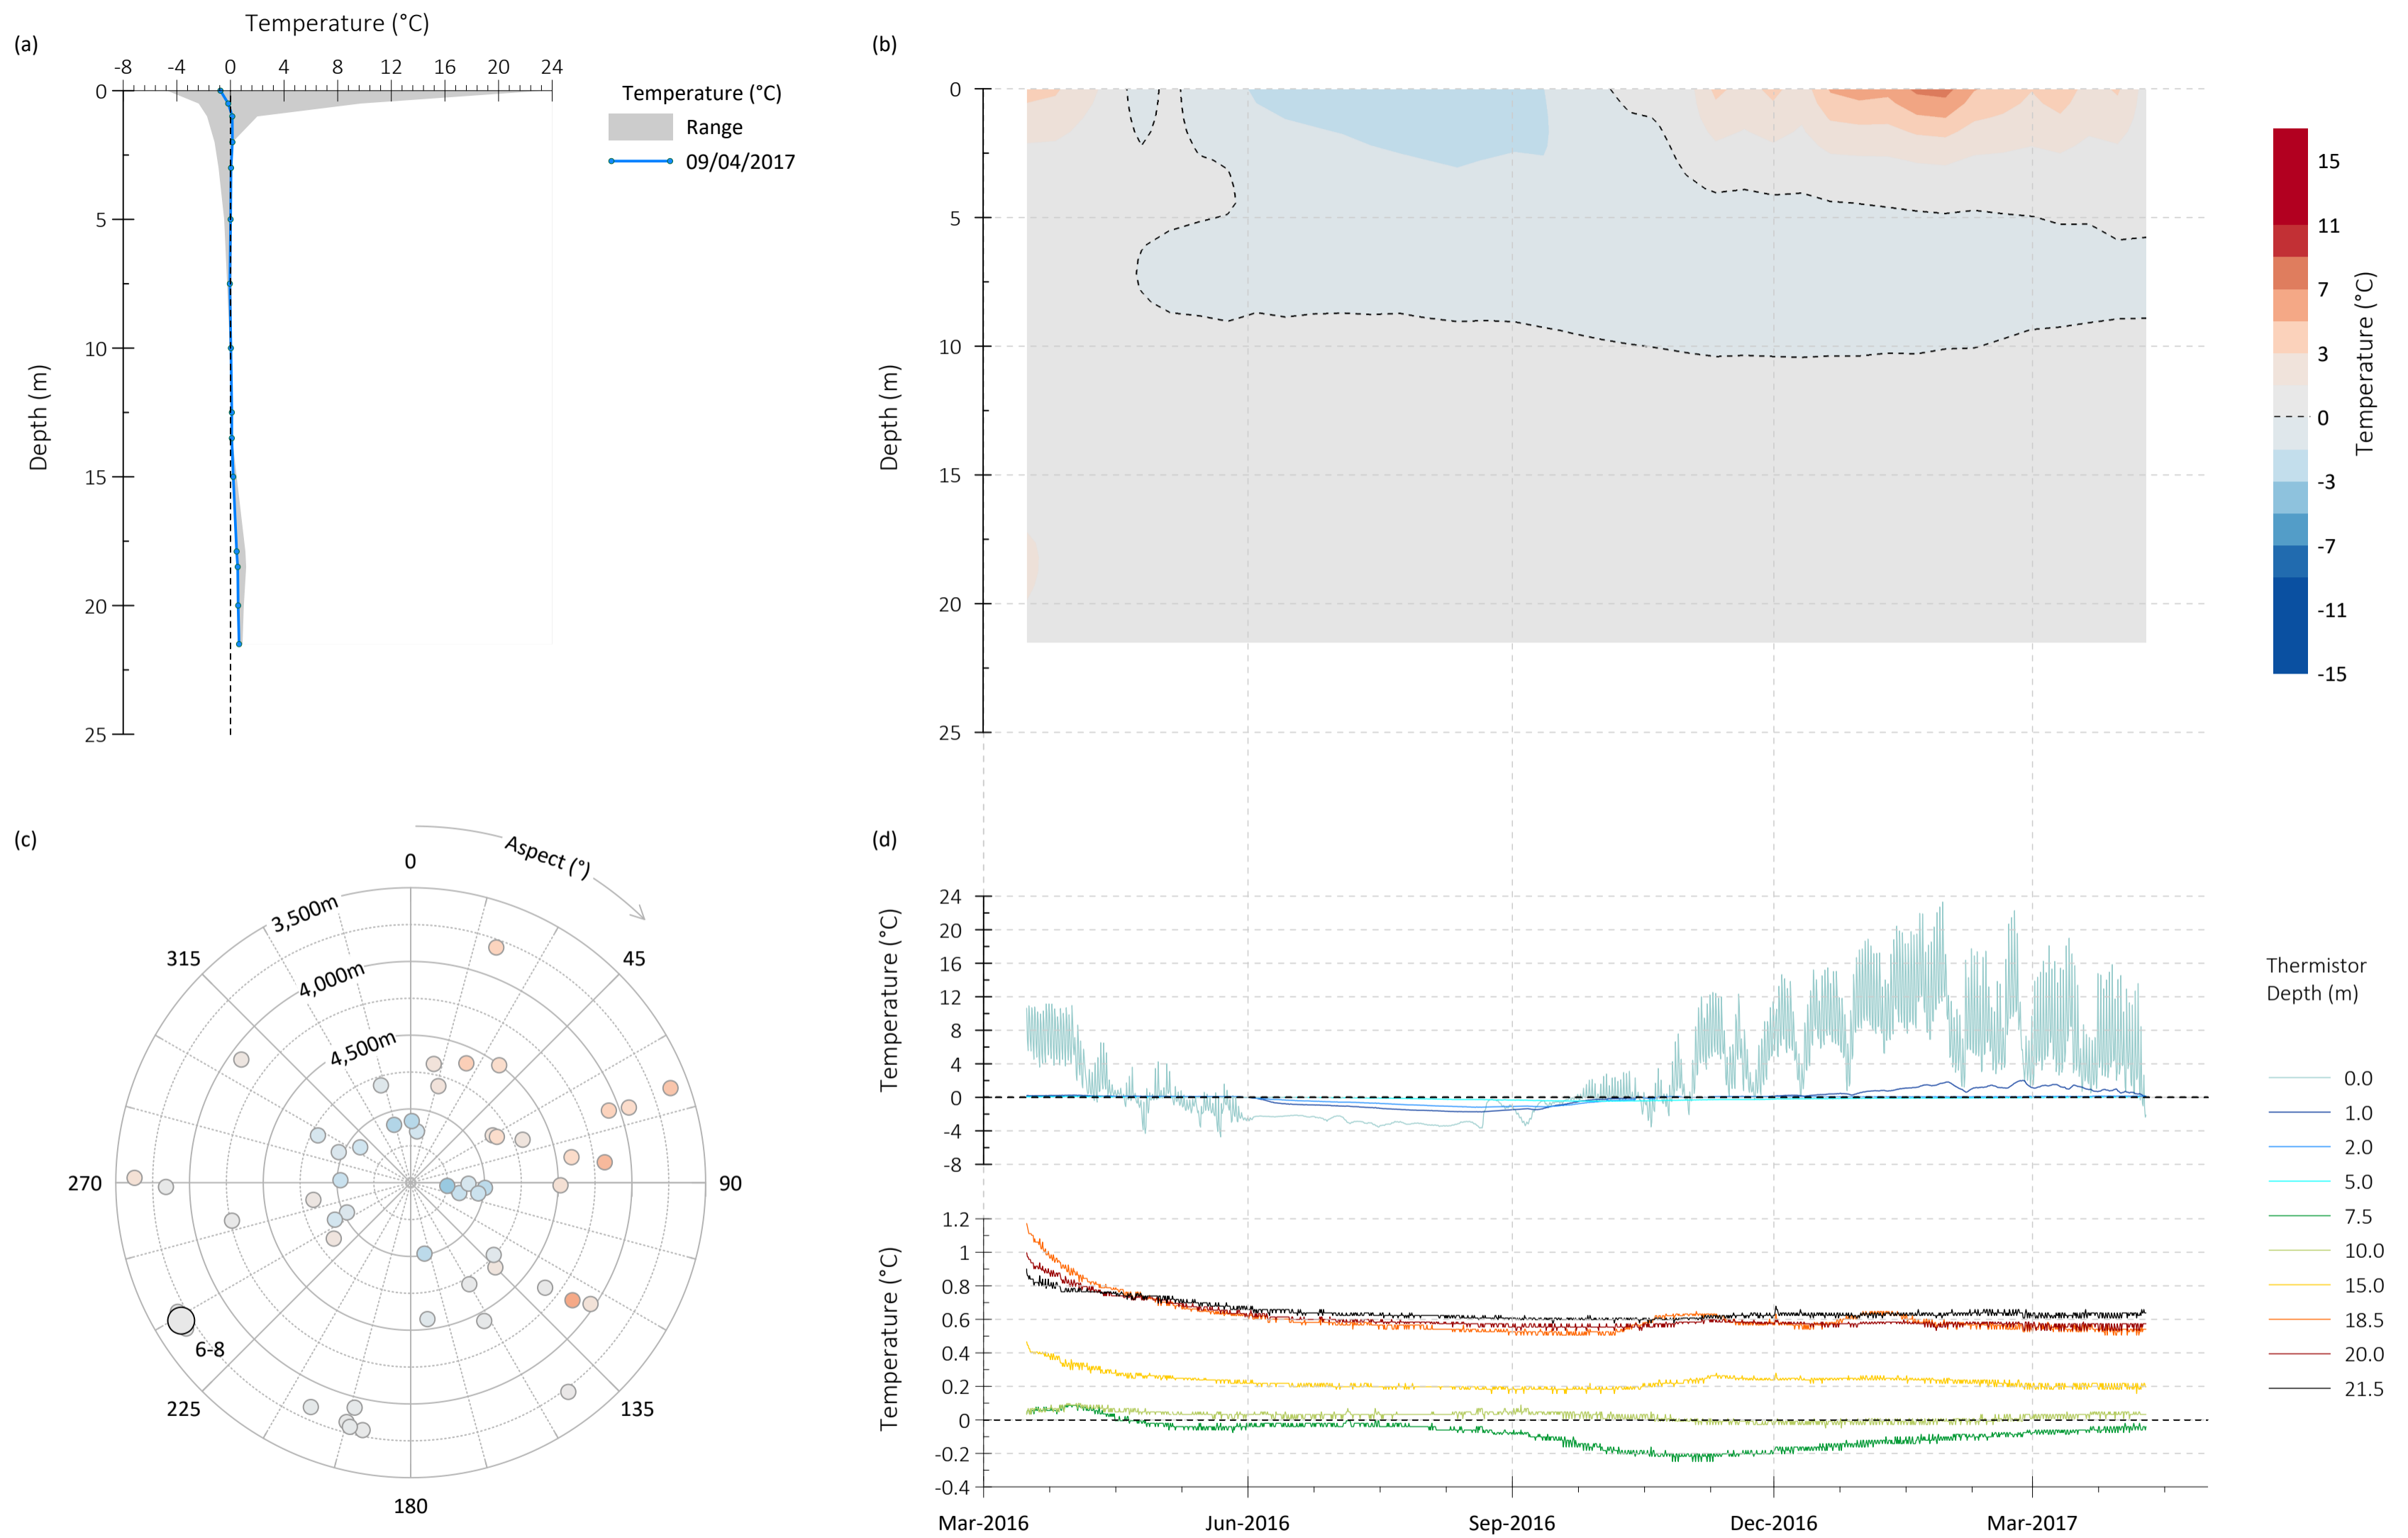

Figure S43: Ground thermal regime for Borehole 6-8 (El. = 3,684 m, Rock Glacier). Measurements collected approximately every 6 hours between 15/03/2016 and 09/04/2017.

(a) Temperature depth profile. Range estimated using hourly raw data. Daily average of most recent available measurements shown in blue.

(b) Interpreted borehole temperature evolution with time. Contours estimated from hourly raw data.

(c) Aspect-elevation-temperature diagram of most recent monthly temperatures below DZAA at all boreholes; colour scale same as plot (b). Borehole 6-8 ( $T = -0.05$  °C, depth = 7.5m) is indicated by enlarged symbol.

(d) Raw temperature time-series for selected depths at Borehole 6-8. Full dataset includes measurements from 15 sensors.

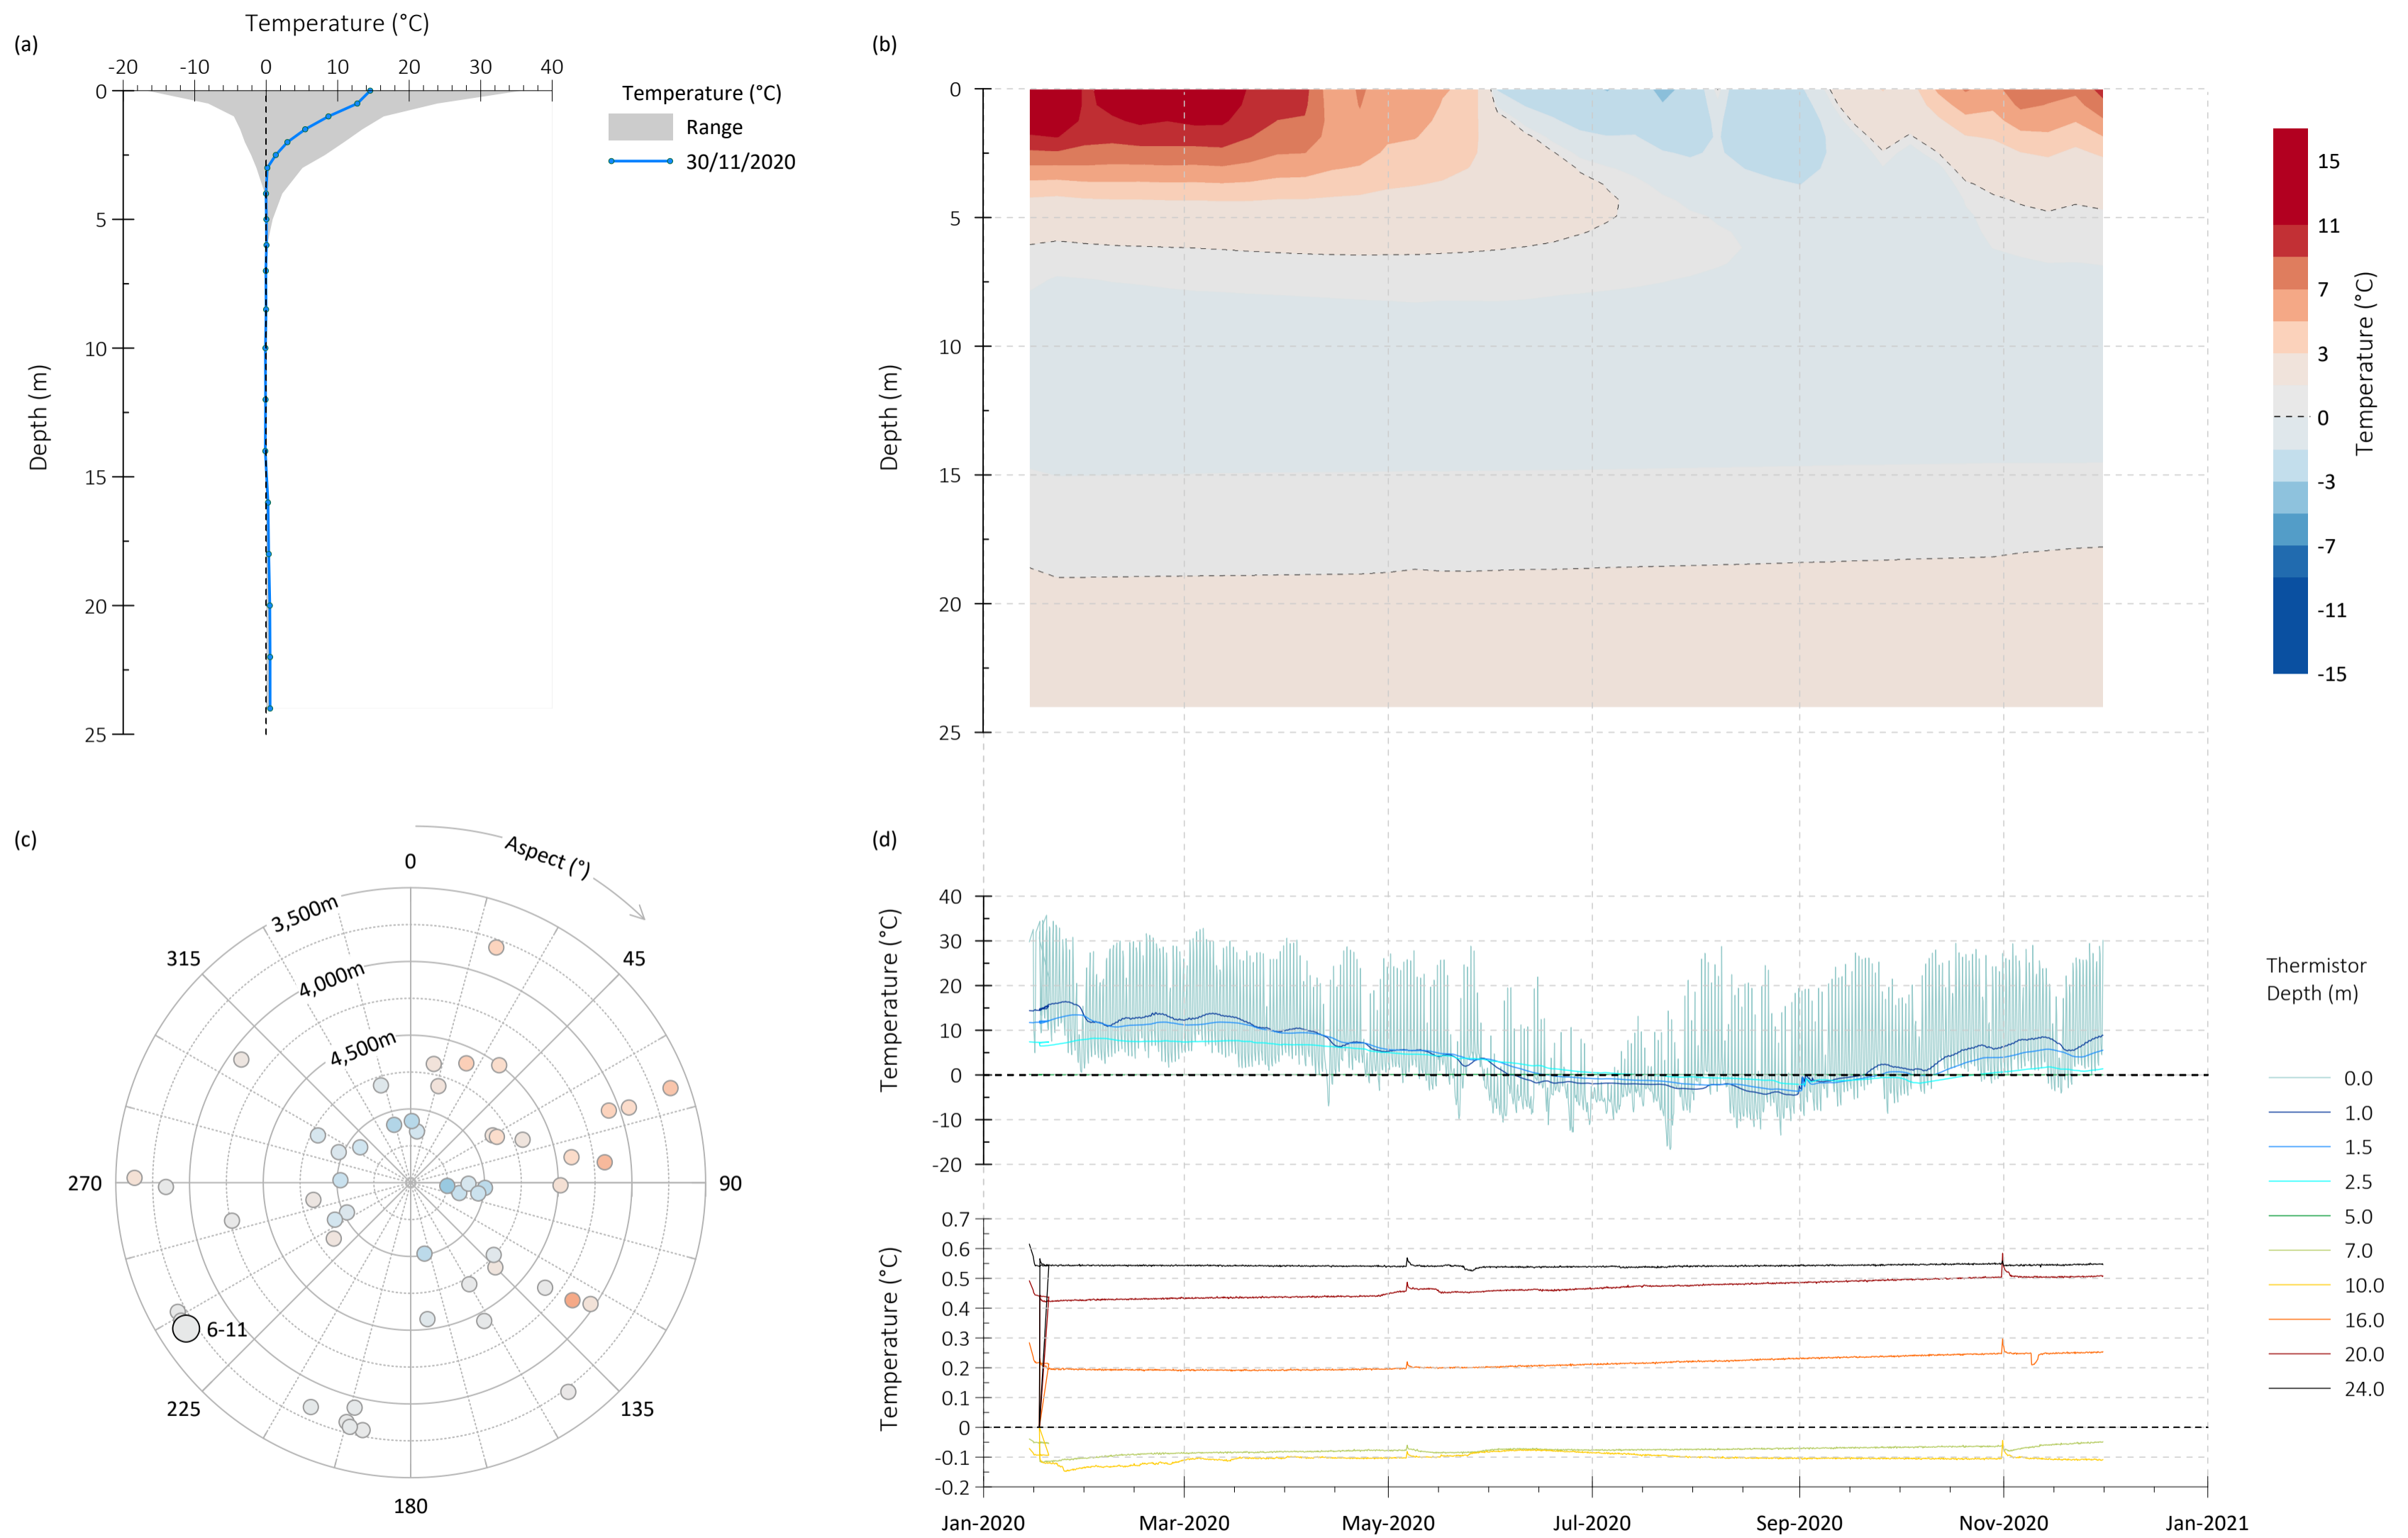

Figure S44: Ground thermal regime for Borehole 6-11 (El. = 3,684 m, Rock Glacier). Measurements collected approximately every 4 hours between 14/01/2020 and 30/11/2020.

(a) Temperature depth profile. Range estimated using hourly raw data. Daily average of most recent available measurements shown in blue.

(b) Interpreted borehole temperature evolution with time. Contours estimated from hourly raw data.

(c) Aspect-elevation-temperature diagram of most recent monthly temperatures below DZAA at all boreholes; colour scale same as plot (b). Borehole 6-11 ( $T = -0.1$  °C, depth=10 m) is indicated by enlarged symbol.

(d) Raw temperature time-series for selected depths at Borehole 6-11. Full dataset includes measurements from 20 sensors.



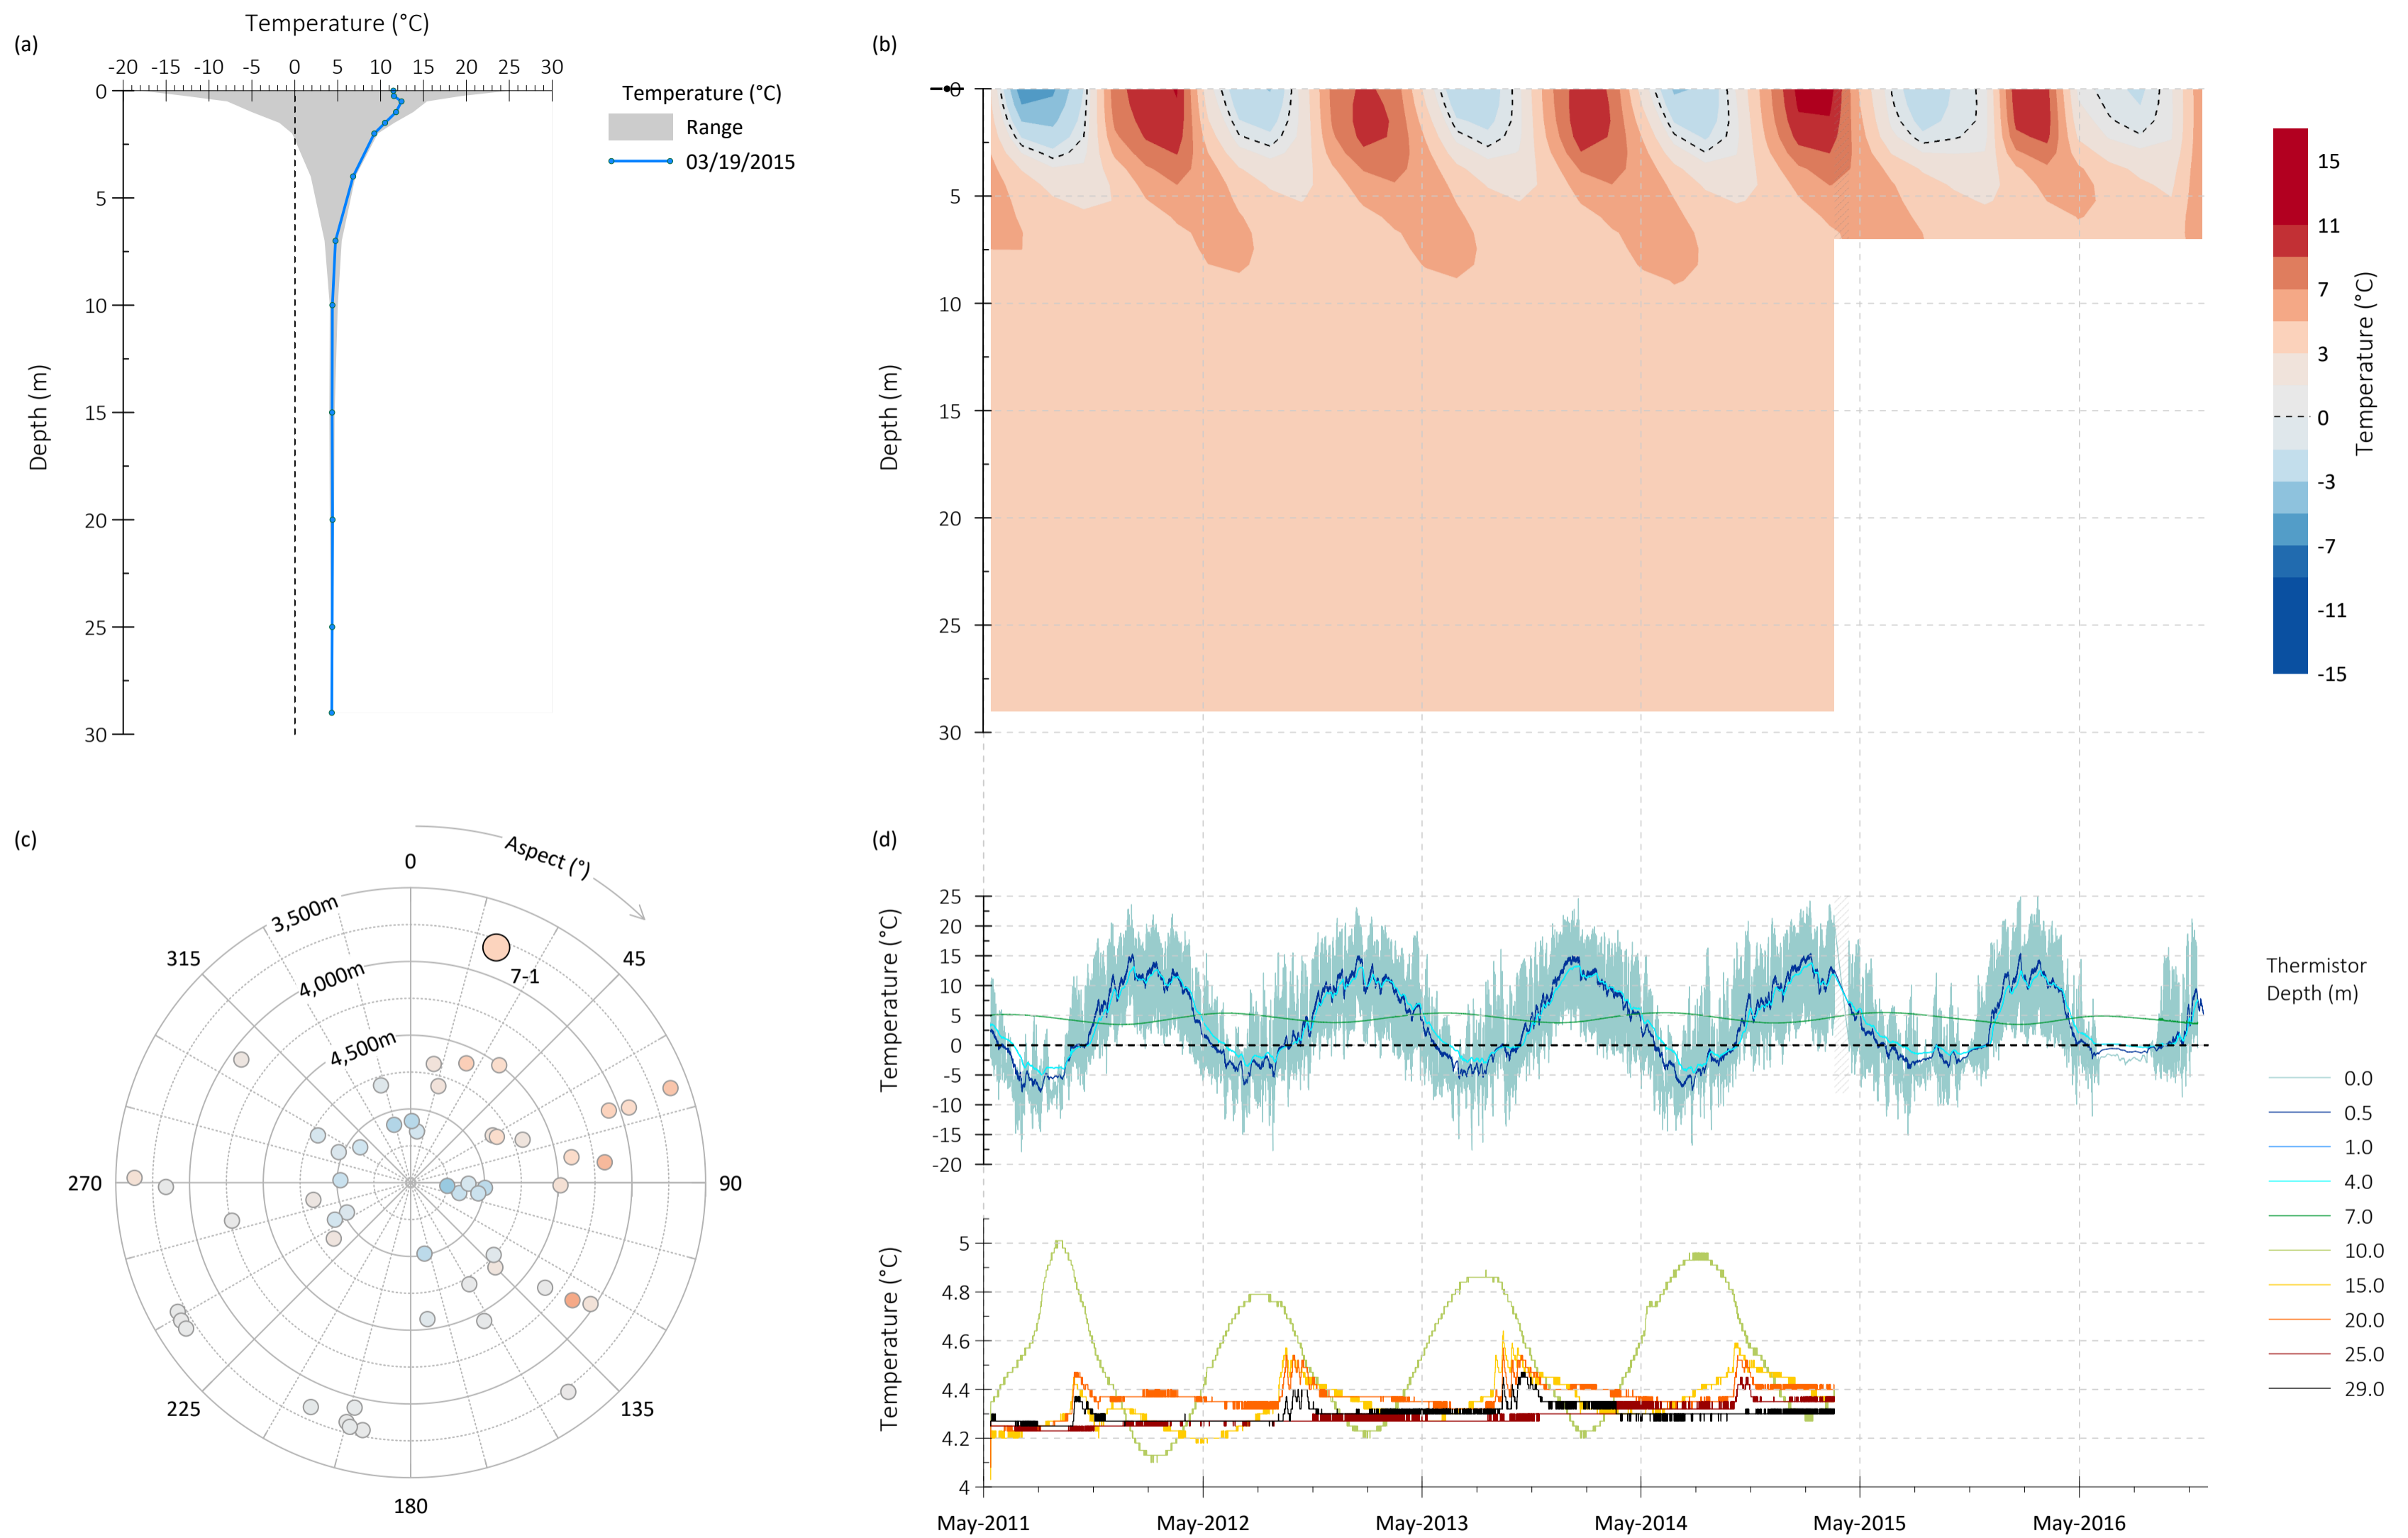

Figure S45: Ground thermal regime for Borehole 7-1 (El. = 3,803 m, Colluvium). Measurements collected approximately every 4 hours between 12/05/2011 and 23/11/2016. Interpolated data indicated by grey hatched areas. No data at thermistors 2.0 m and below 7 m depth after 19/03/2015. After 14/11/2016 data only available from thermistor 0.5 m.

(a) Temperature depth profile. Range estimated using hourly raw data and interpolated values. Daily average of most recent available measurements shown in blue.

(b) Interpreted borehole temperature evolution with time. Contours estimated from hourly raw data and interpolated values.

(c) Aspect-elevation-temperature diagram of most recent monthly temperatures below DZAA at all boreholes; colour scale same as plot (b). Borehole 7-1 (T = 4.36 °C, depth = 25 m) is indicated by enlarged symbol.

(d) Raw temperature time-series for selected depths at Borehole 7-1. Full dataset includes measurements from 13 sensors. Daily interpolated values are also shown.

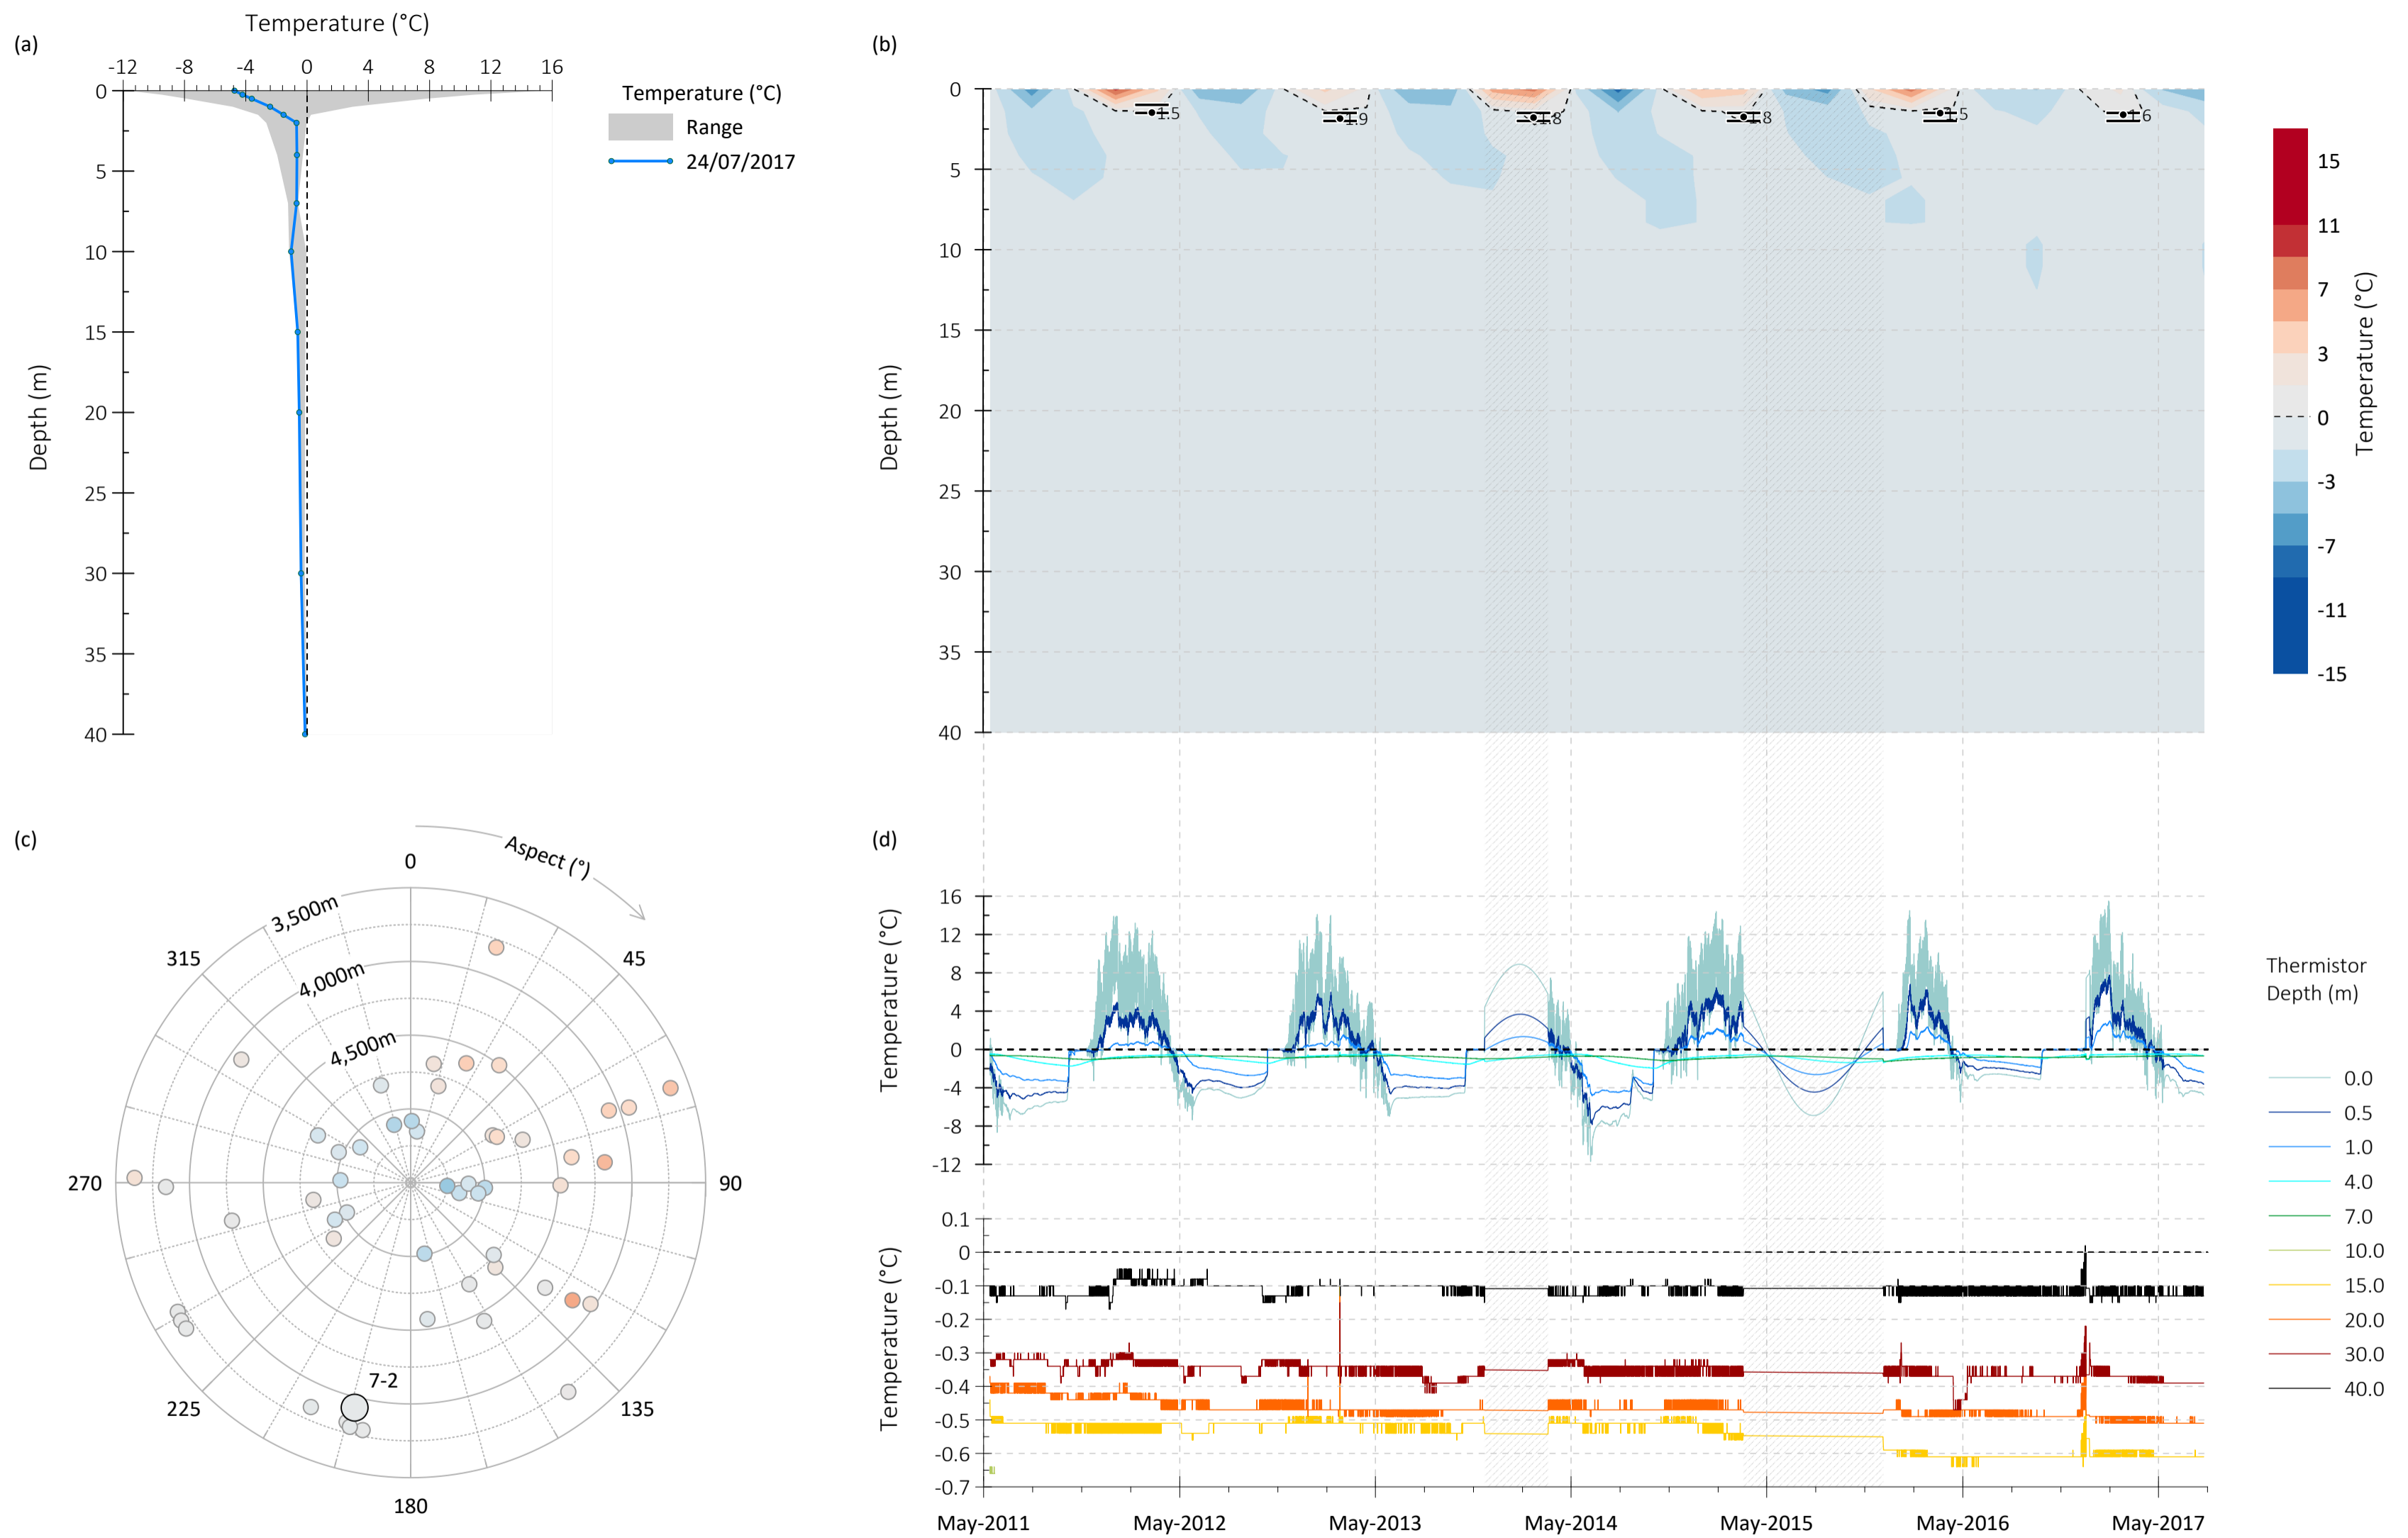

Figure S46: Ground thermal regime for Borehole 7-2 (El. = 3,928 m, Bedrock). Measurements collected approximately every 4 hours between 12/05/2011 and 24/07/2017. Interpolated data indicated by grey hatched areas.

(a) Temperature depth profile. Range estimated using hourly raw data and interpolated values. Daily average of most recent available measurements shown in blue.

(b) Interpreted borehole temperature evolution with time. Contours estimated from hourly raw data and interpolated values. Active layer thickness indicated by black dots; horizontal lines indicate the depth of thermistors used for interpolation.

(c) Aspect-elevation-temperature diagram of most recent monthly temperatures below DZAA at all boreholes; colour scale same as plot (b). Borehole 7-2 ( $T = -0.51$  °C, depth=20 m) is indicated by enlarged symbol.

(d) Raw temperature time-series for selected depths at Borehole 7-2. Full dataset includes measurements from 13 sensors. Daily interpolated values are also shown.

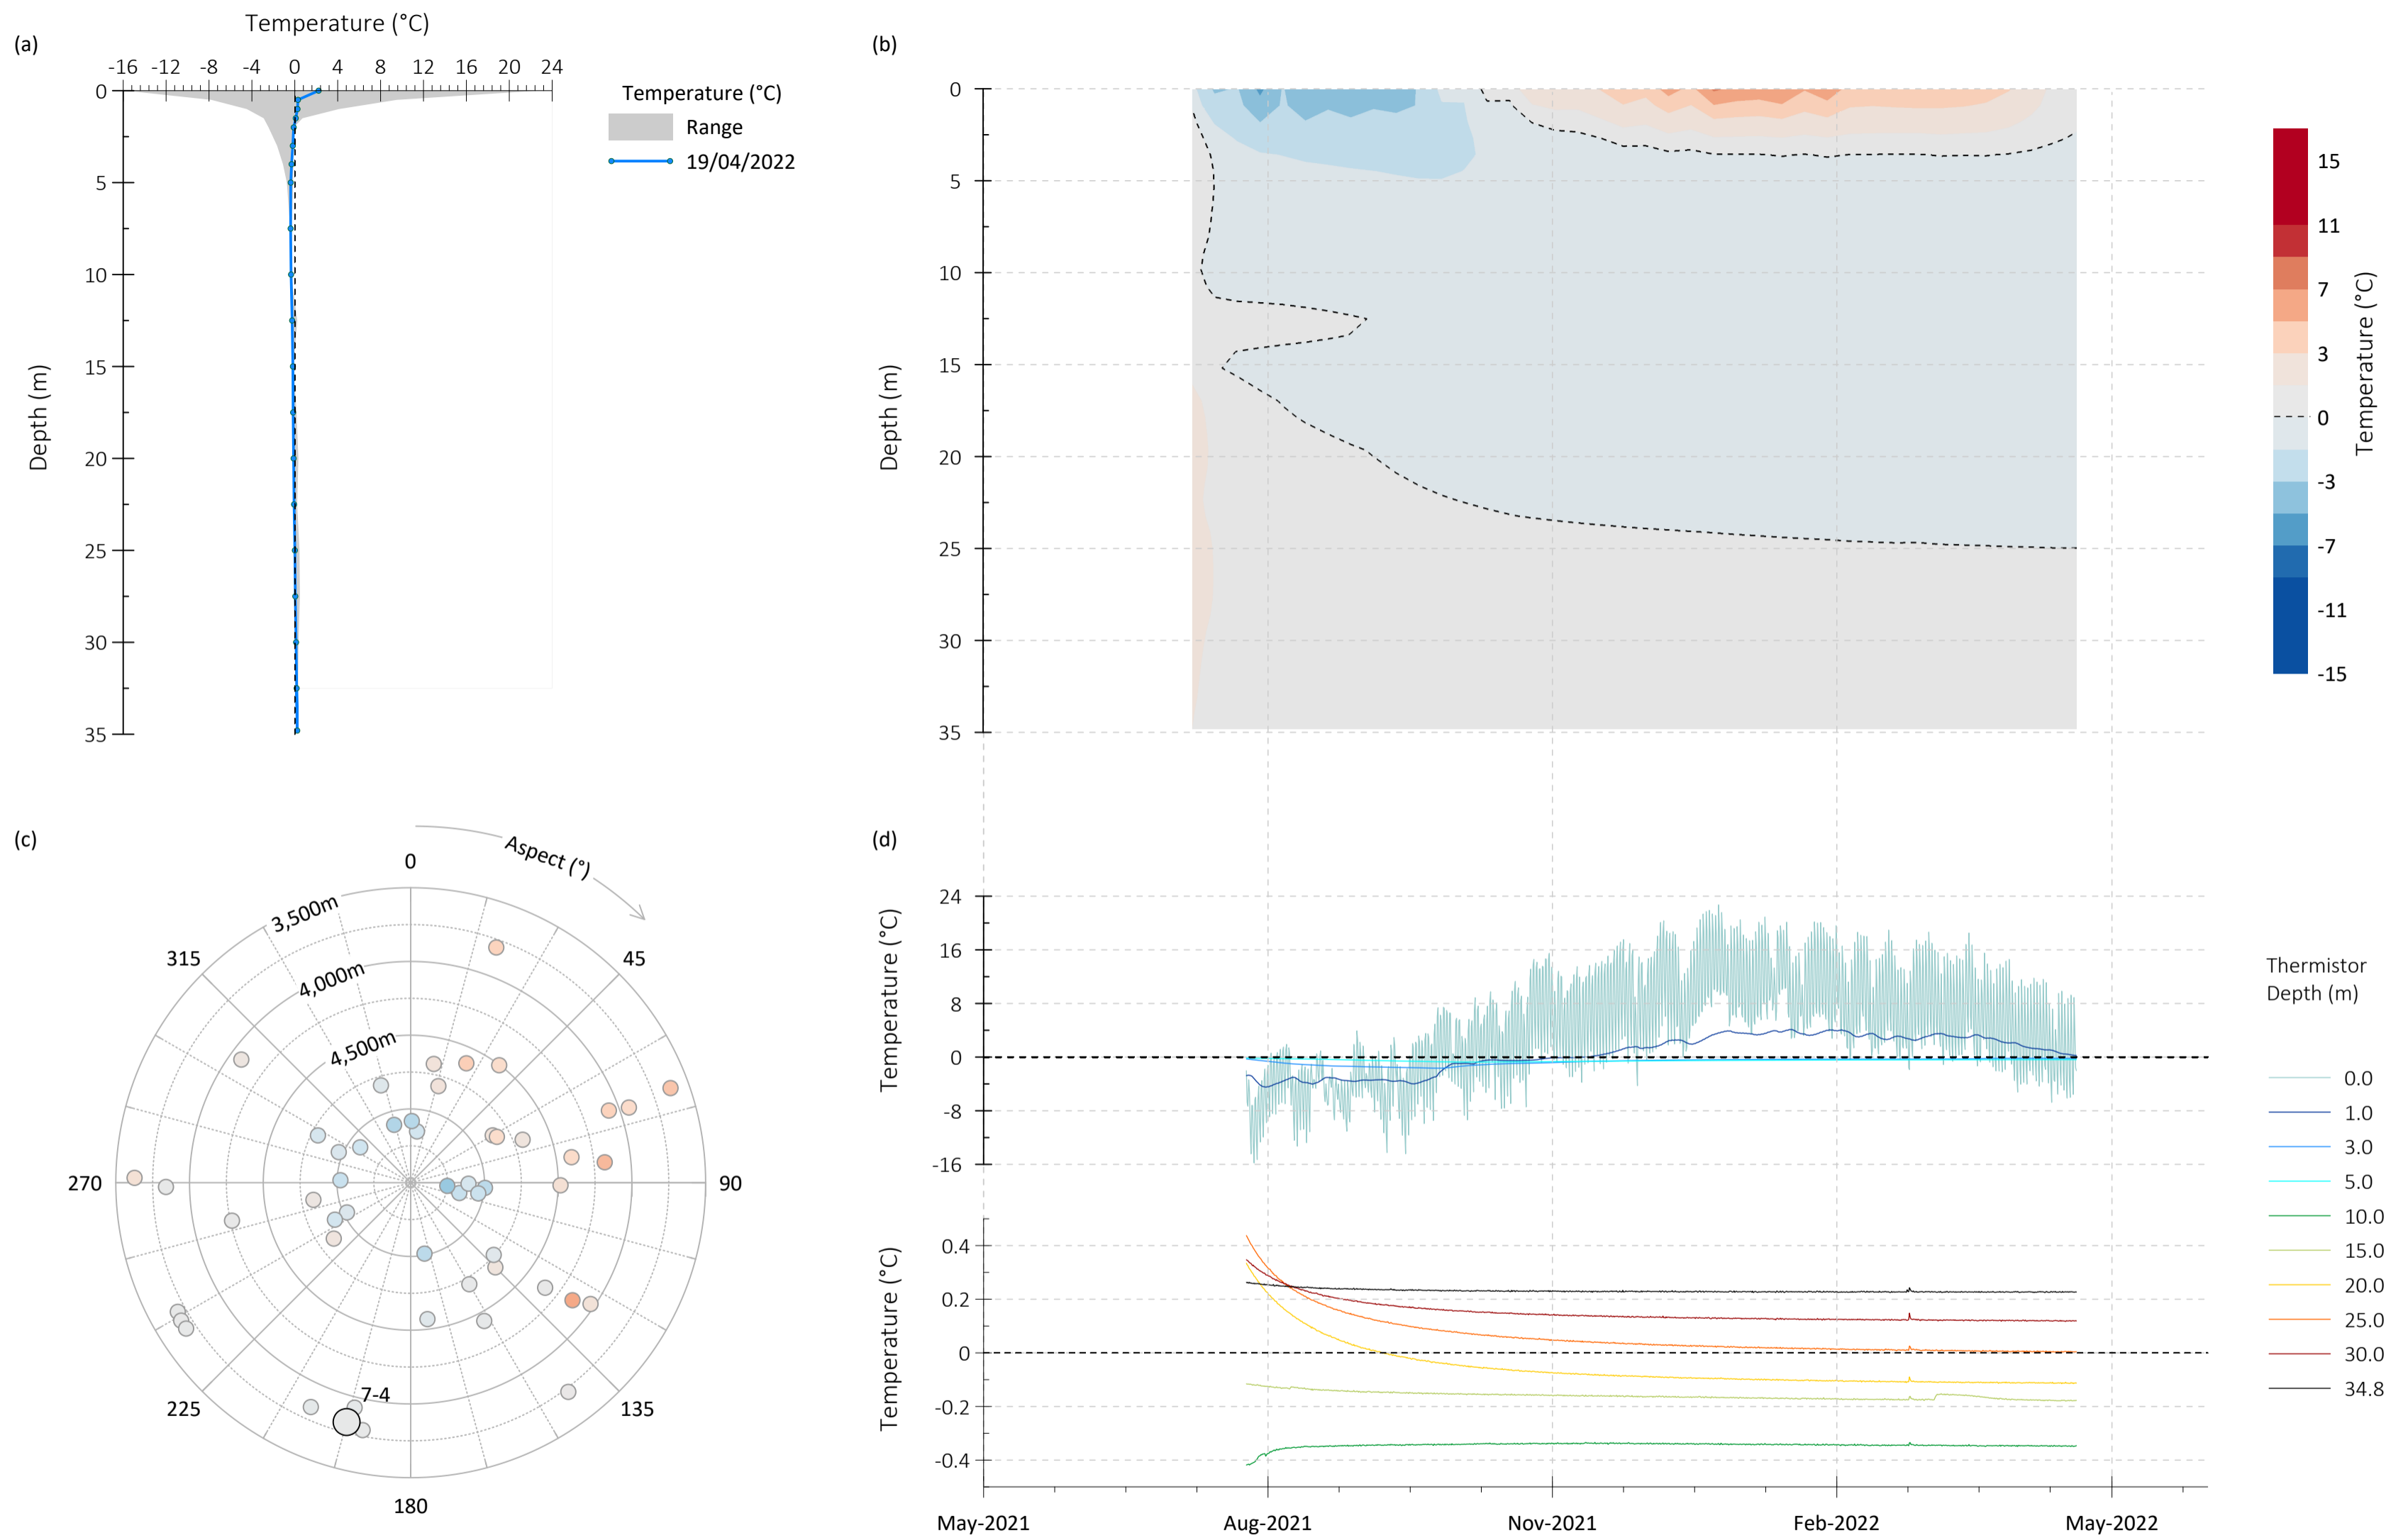

Figure S48: Ground thermal regime for Borehole 7-4 (El. = 3,820 m, Rock Glacier). Measurements collected approximately every 6 hours between 07/07/2021 and 19/04/2022. Early measurements affected by drilling.

(a) Temperature depth profile. Range estimated using hourly raw data. Daily average of most recent available measurements shown in blue.

(b) Interpreted borehole temperature evolution with time. Contours estimated from hourly raw data.

(c) Aspect-elevation-temperature diagram of most recent monthly temperatures below DZAA at all boreholes; colour scale same as plot (b). Borehole 7-4 ( $T = -0.11$  °C, depth=20 m) is indicated by enlarged symbol.

(d) Raw temperature time-series for selected depths at Borehole 7-4. Full dataset includes measurements from 20 sensors.

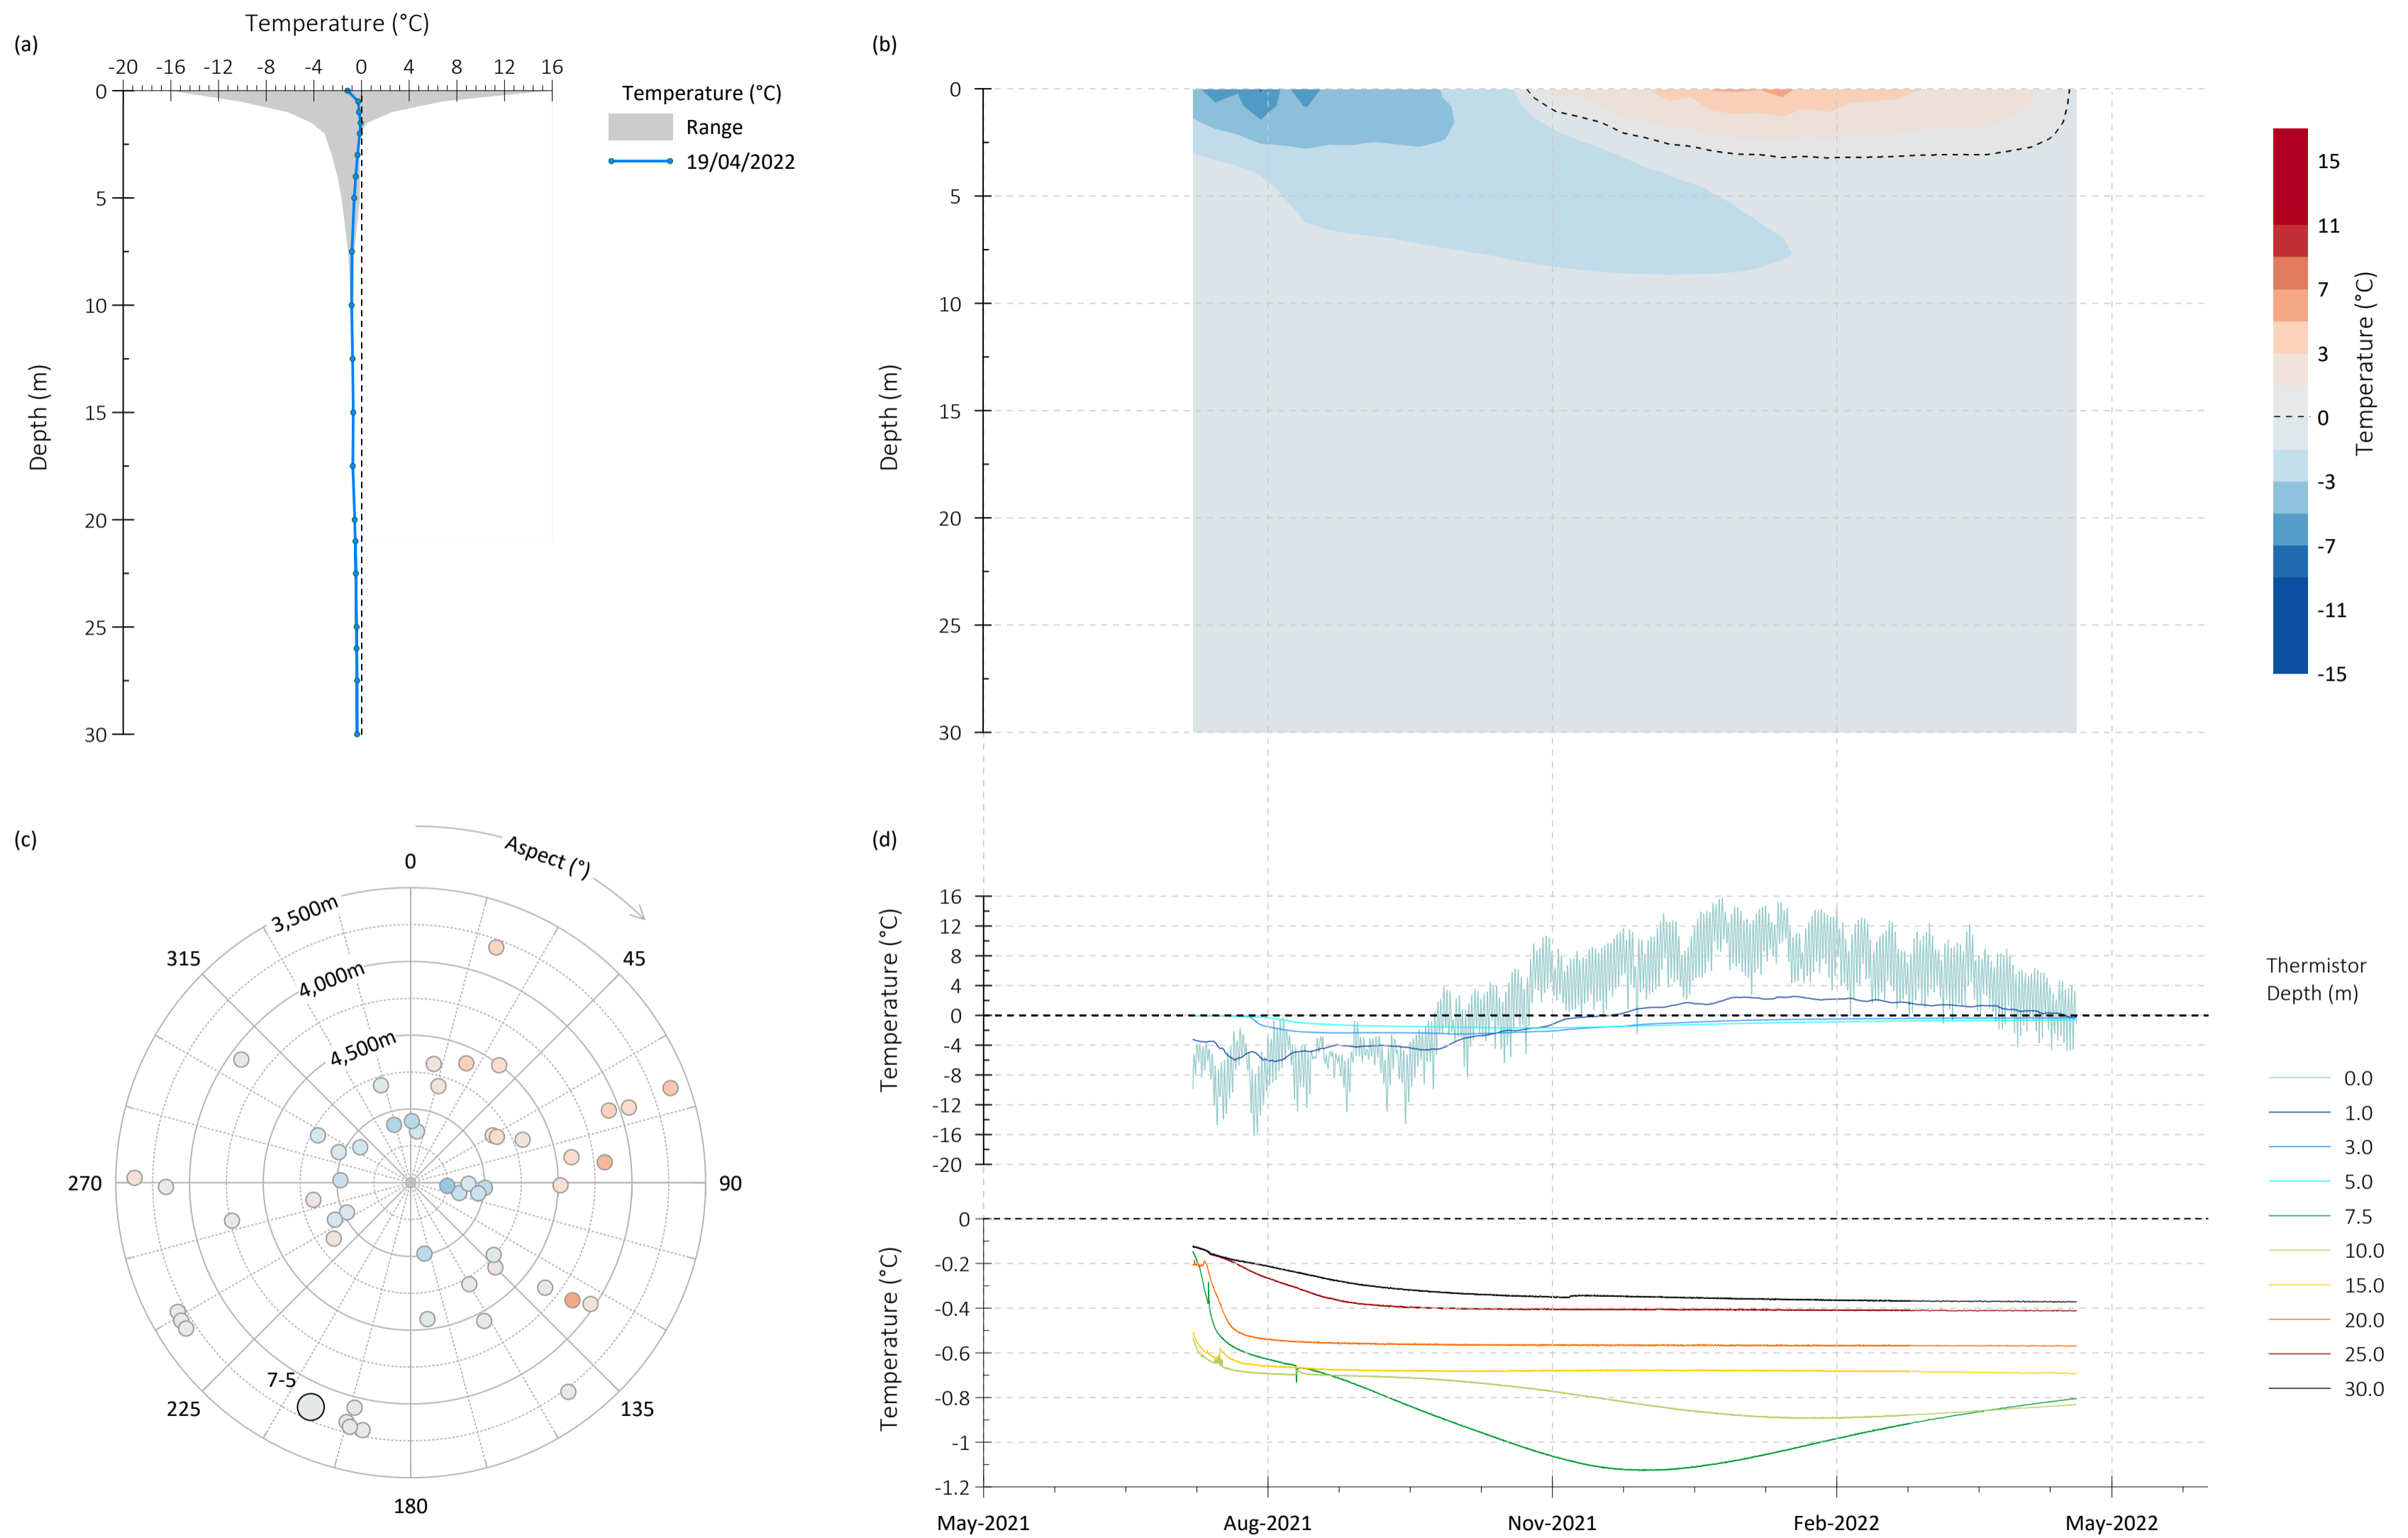

Figure S49: Ground thermal regime for Borehole 7-5 (El. = 3,835 m, Rock Glacier). Hourly measurements collected between 07/07/2021 and 19/04/2022. Early measurements affected by drilling.

(a) Temperature depth profile. Range estimated using hourly raw data. Daily average of most recent available measurements shown in blue.

(b) Interpreted borehole temperature evolution with time. Contours estimated from hourly raw data.

(c) Aspect-elevation-temperature diagram of most recent monthly temperatures below DZAA at all boreholes; colour scale same as plot (b). Borehole 7-5 ( $T = -0.57$  °C, depth=20 m) is indicated by enlarged symbol.

(d) Raw temperature time-series for selected depths at Borehole 7-5. Full dataset includes measurements from 20 sensors.

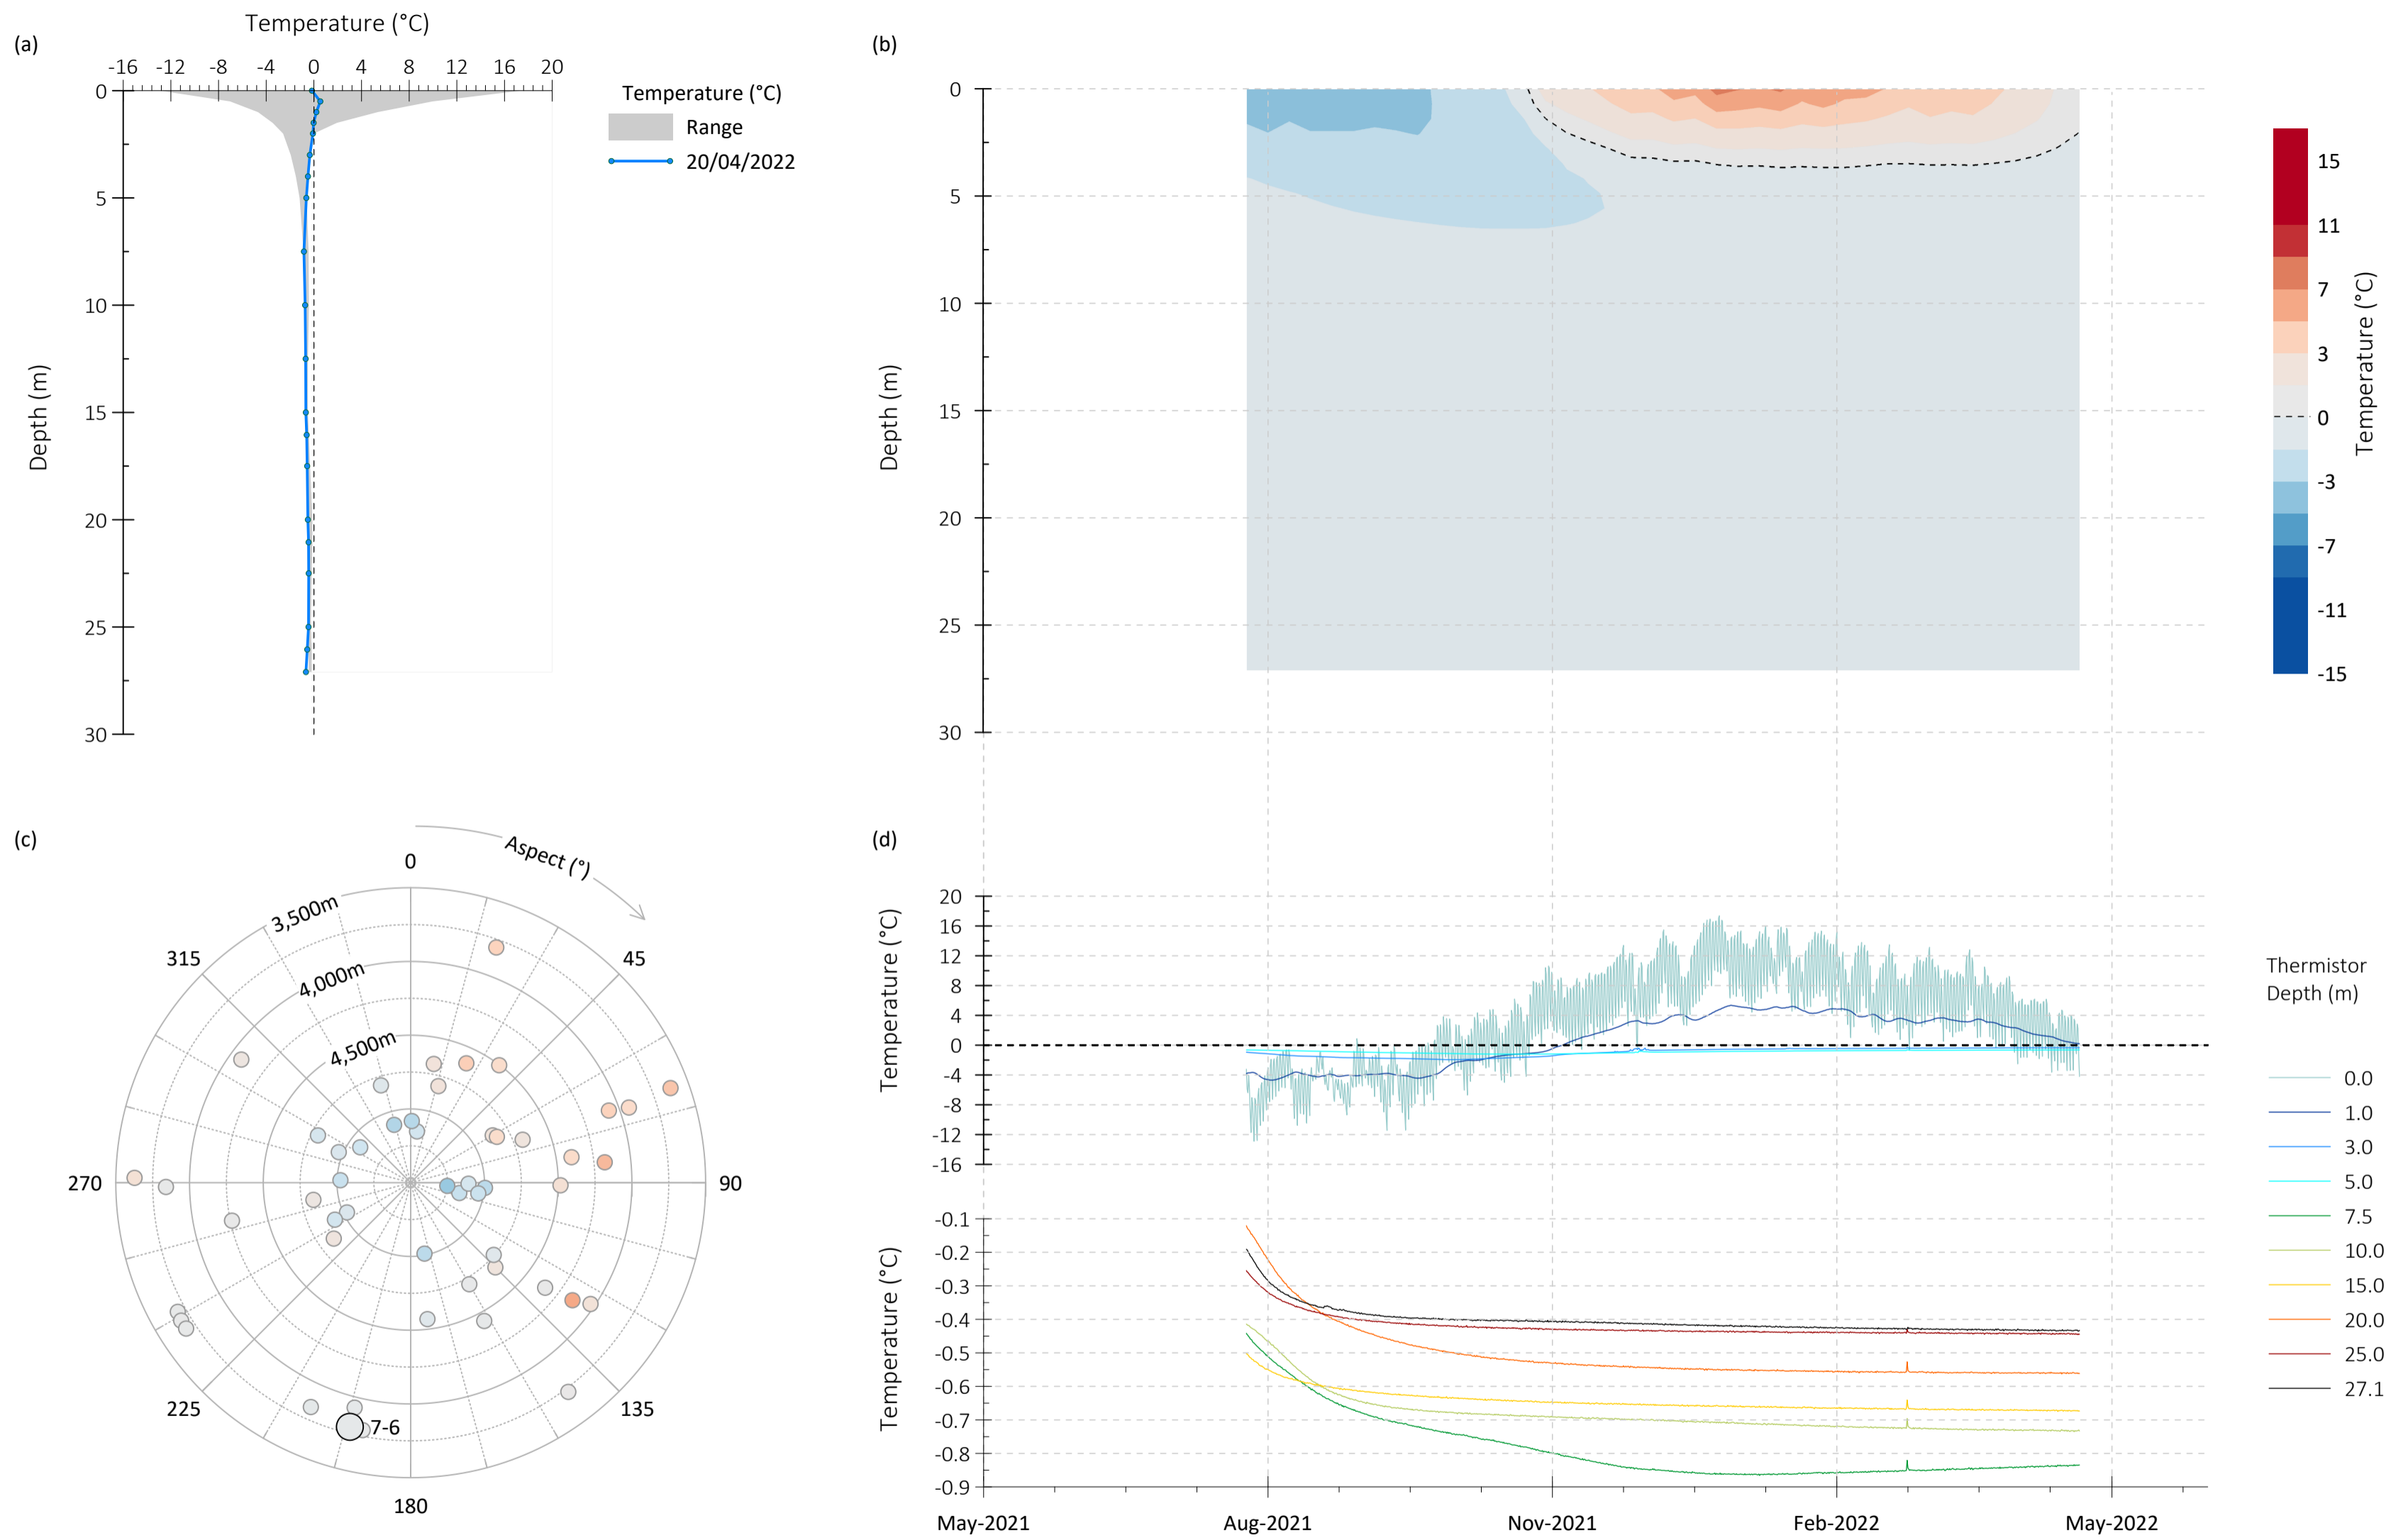

Figure S50: Ground thermal regime for Borehole 7-6 (El. = 3,794 m, Rock Glacier). Measurements collected approximately every 6 hours between 07/07/2021 and 20/04/2022. Early measurements affected by drilling.

(a) Temperature depth profile. Range estimated using hourly raw data. Daily average of most recent available measurements shown in blue.

(b) Interpreted borehole temperature evolution with time. Contours estimated from hourly raw data.

(c) Aspect-elevation-temperature diagram of most recent monthly temperatures below DZAA at all boreholes; colour scale same as plot (b). Borehole 7-6 ( $T = -0.56$  °C, depth=20 m) is indicated by enlarged symbol.

(d) Raw temperature time-series for selected depths at Borehole 7-6. Full dataset includes measurements from 20 sensors.

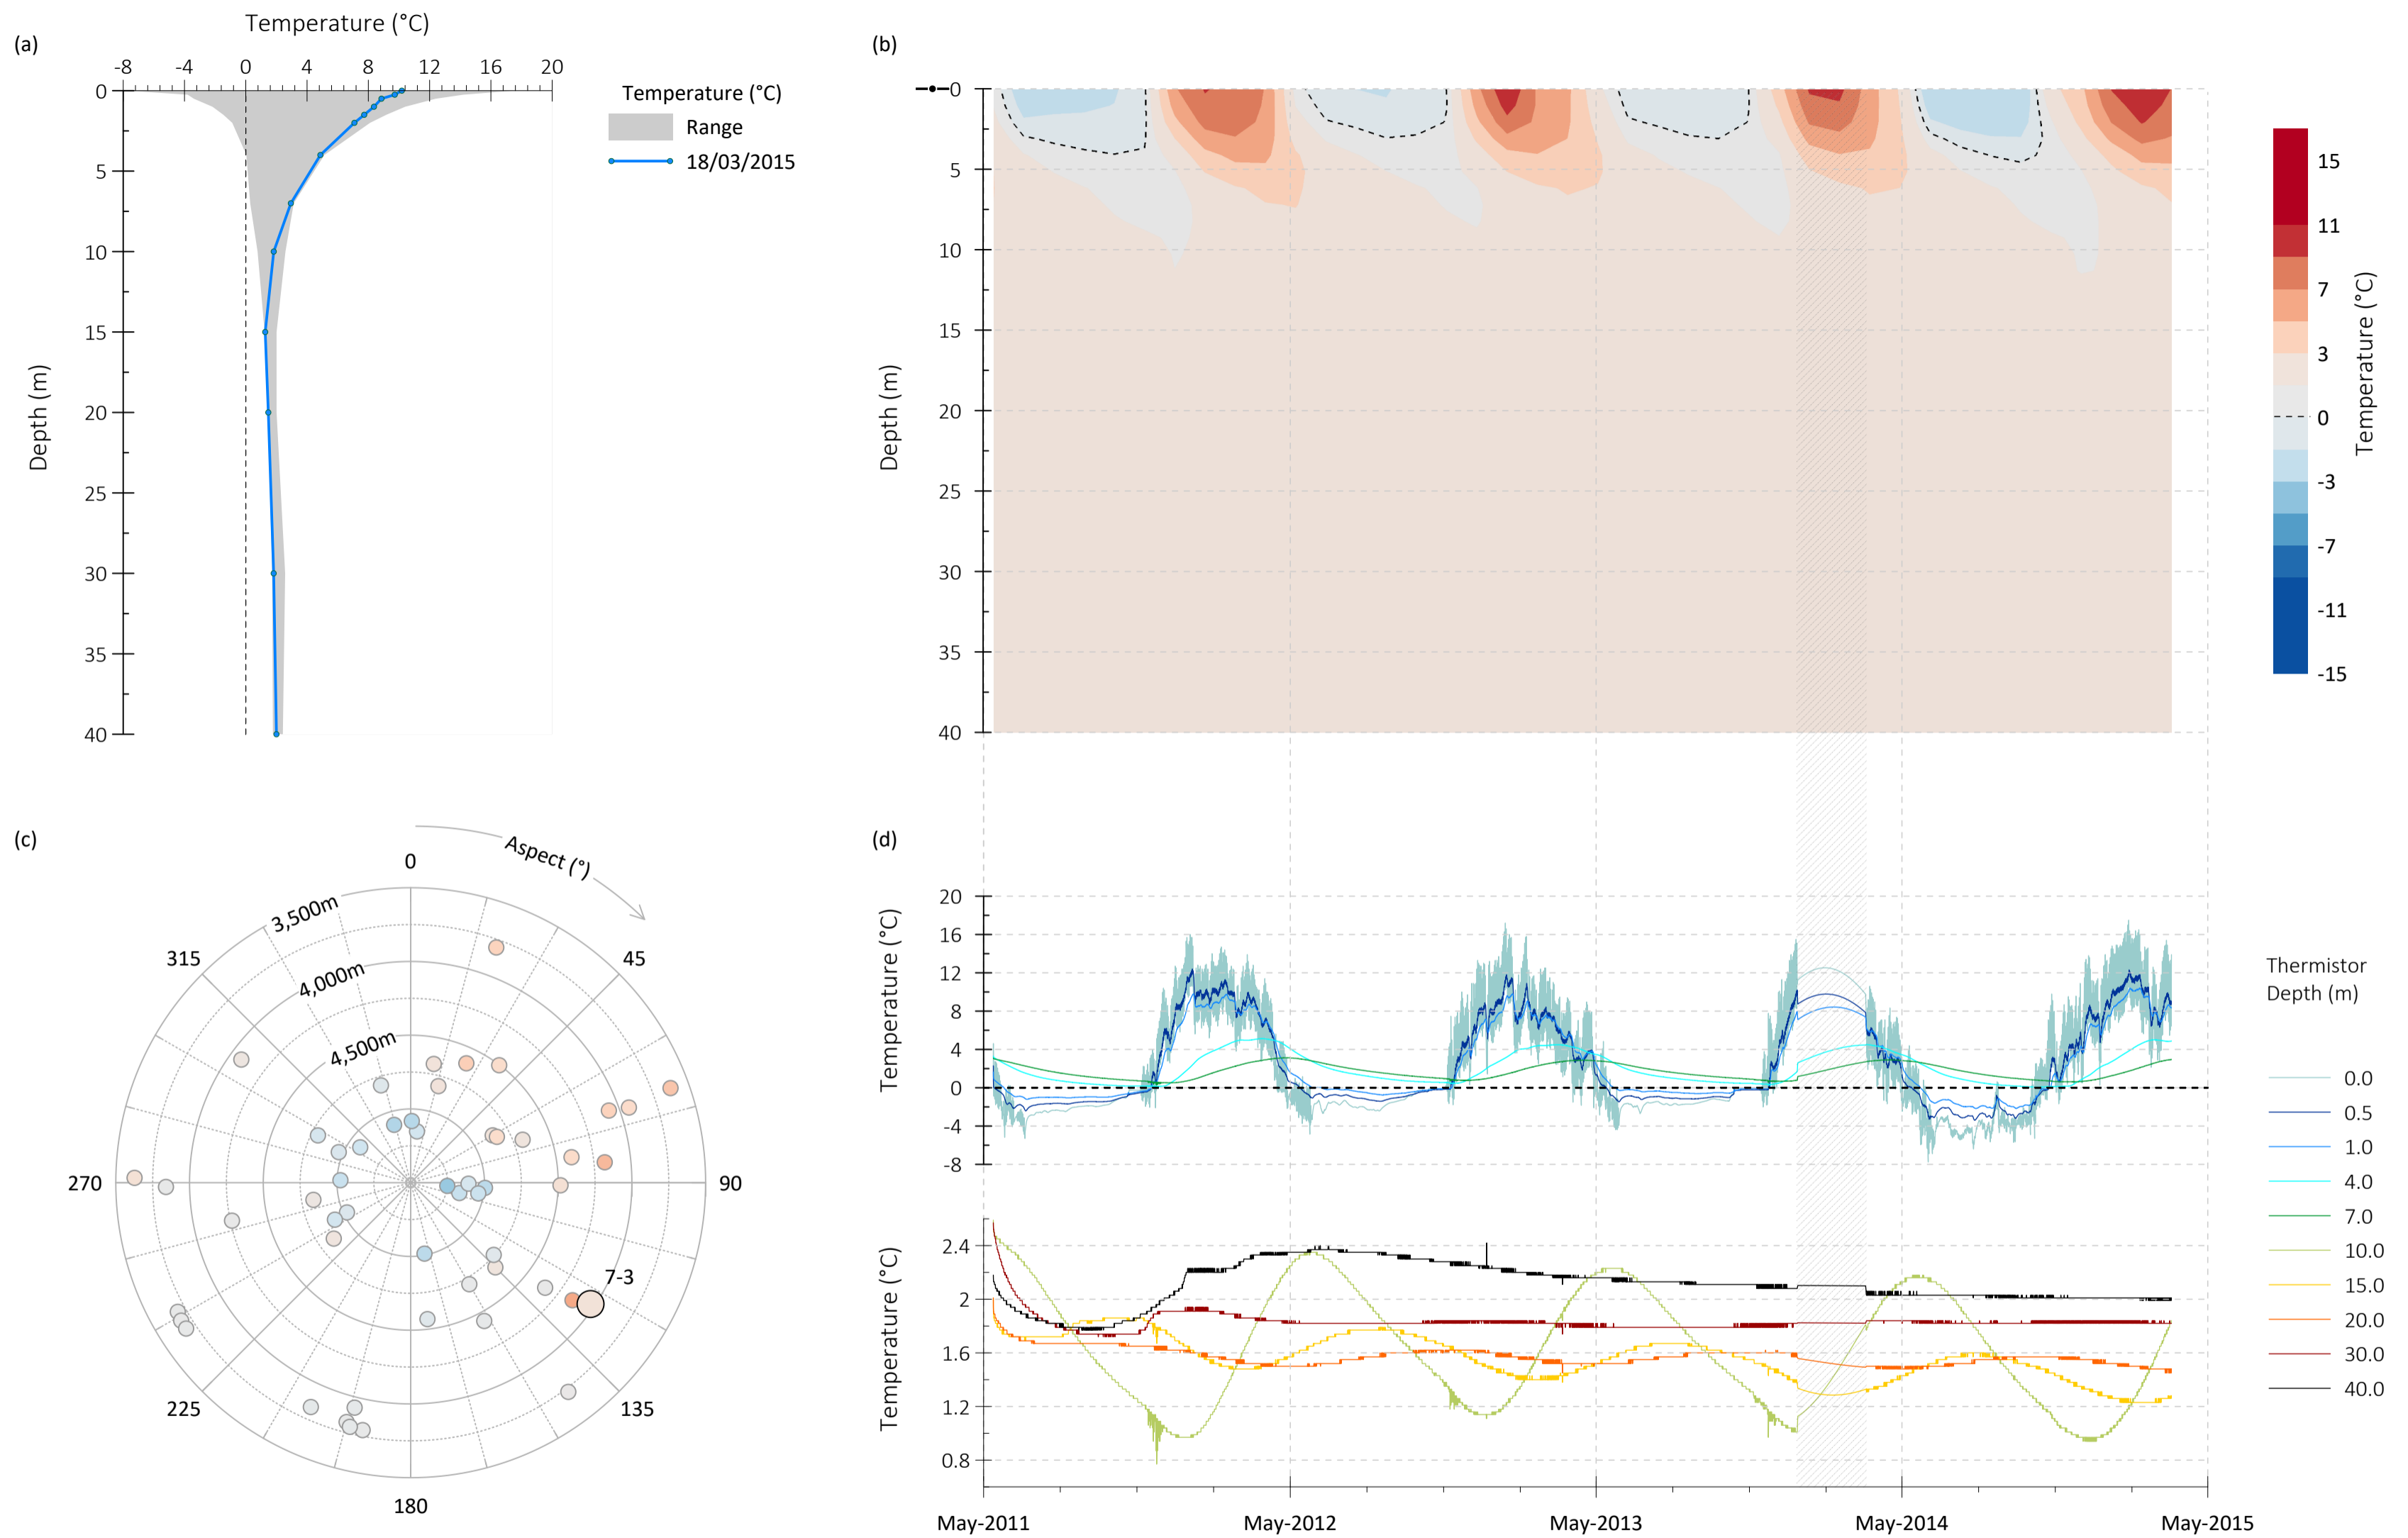

Figure S47: Ground thermal regime for Borehole 7-3 (El. = 4,029 m, Colluvium (thin veneer)). Measurements collected approximately every 4 hours between 12/05/2011 and 18/03/2015. Interpolated data indicated by grey hatched areas.

(a) Temperature depth profile. Range estimated using hourly raw data and interpolated values. Daily average of most recent available measurements shown in blue.

(b) Interpreted borehole temperature evolution with time. Contours estimated from hourly raw data and interpolated values.

(c) Aspect-elevation-temperature diagram of most recent monthly temperatures below DZAA at all boreholes; colour scale same as plot (b). Borehole 7-3 ( $T = 1.82^\circ\text{C}$ , depth=30 m) is indicated by enlarged symbol.

(d) Raw temperature time-series for selected depths at Borehole 7-3. Full dataset includes measurements from 13 sensors. Daily interpolated values are also shown.

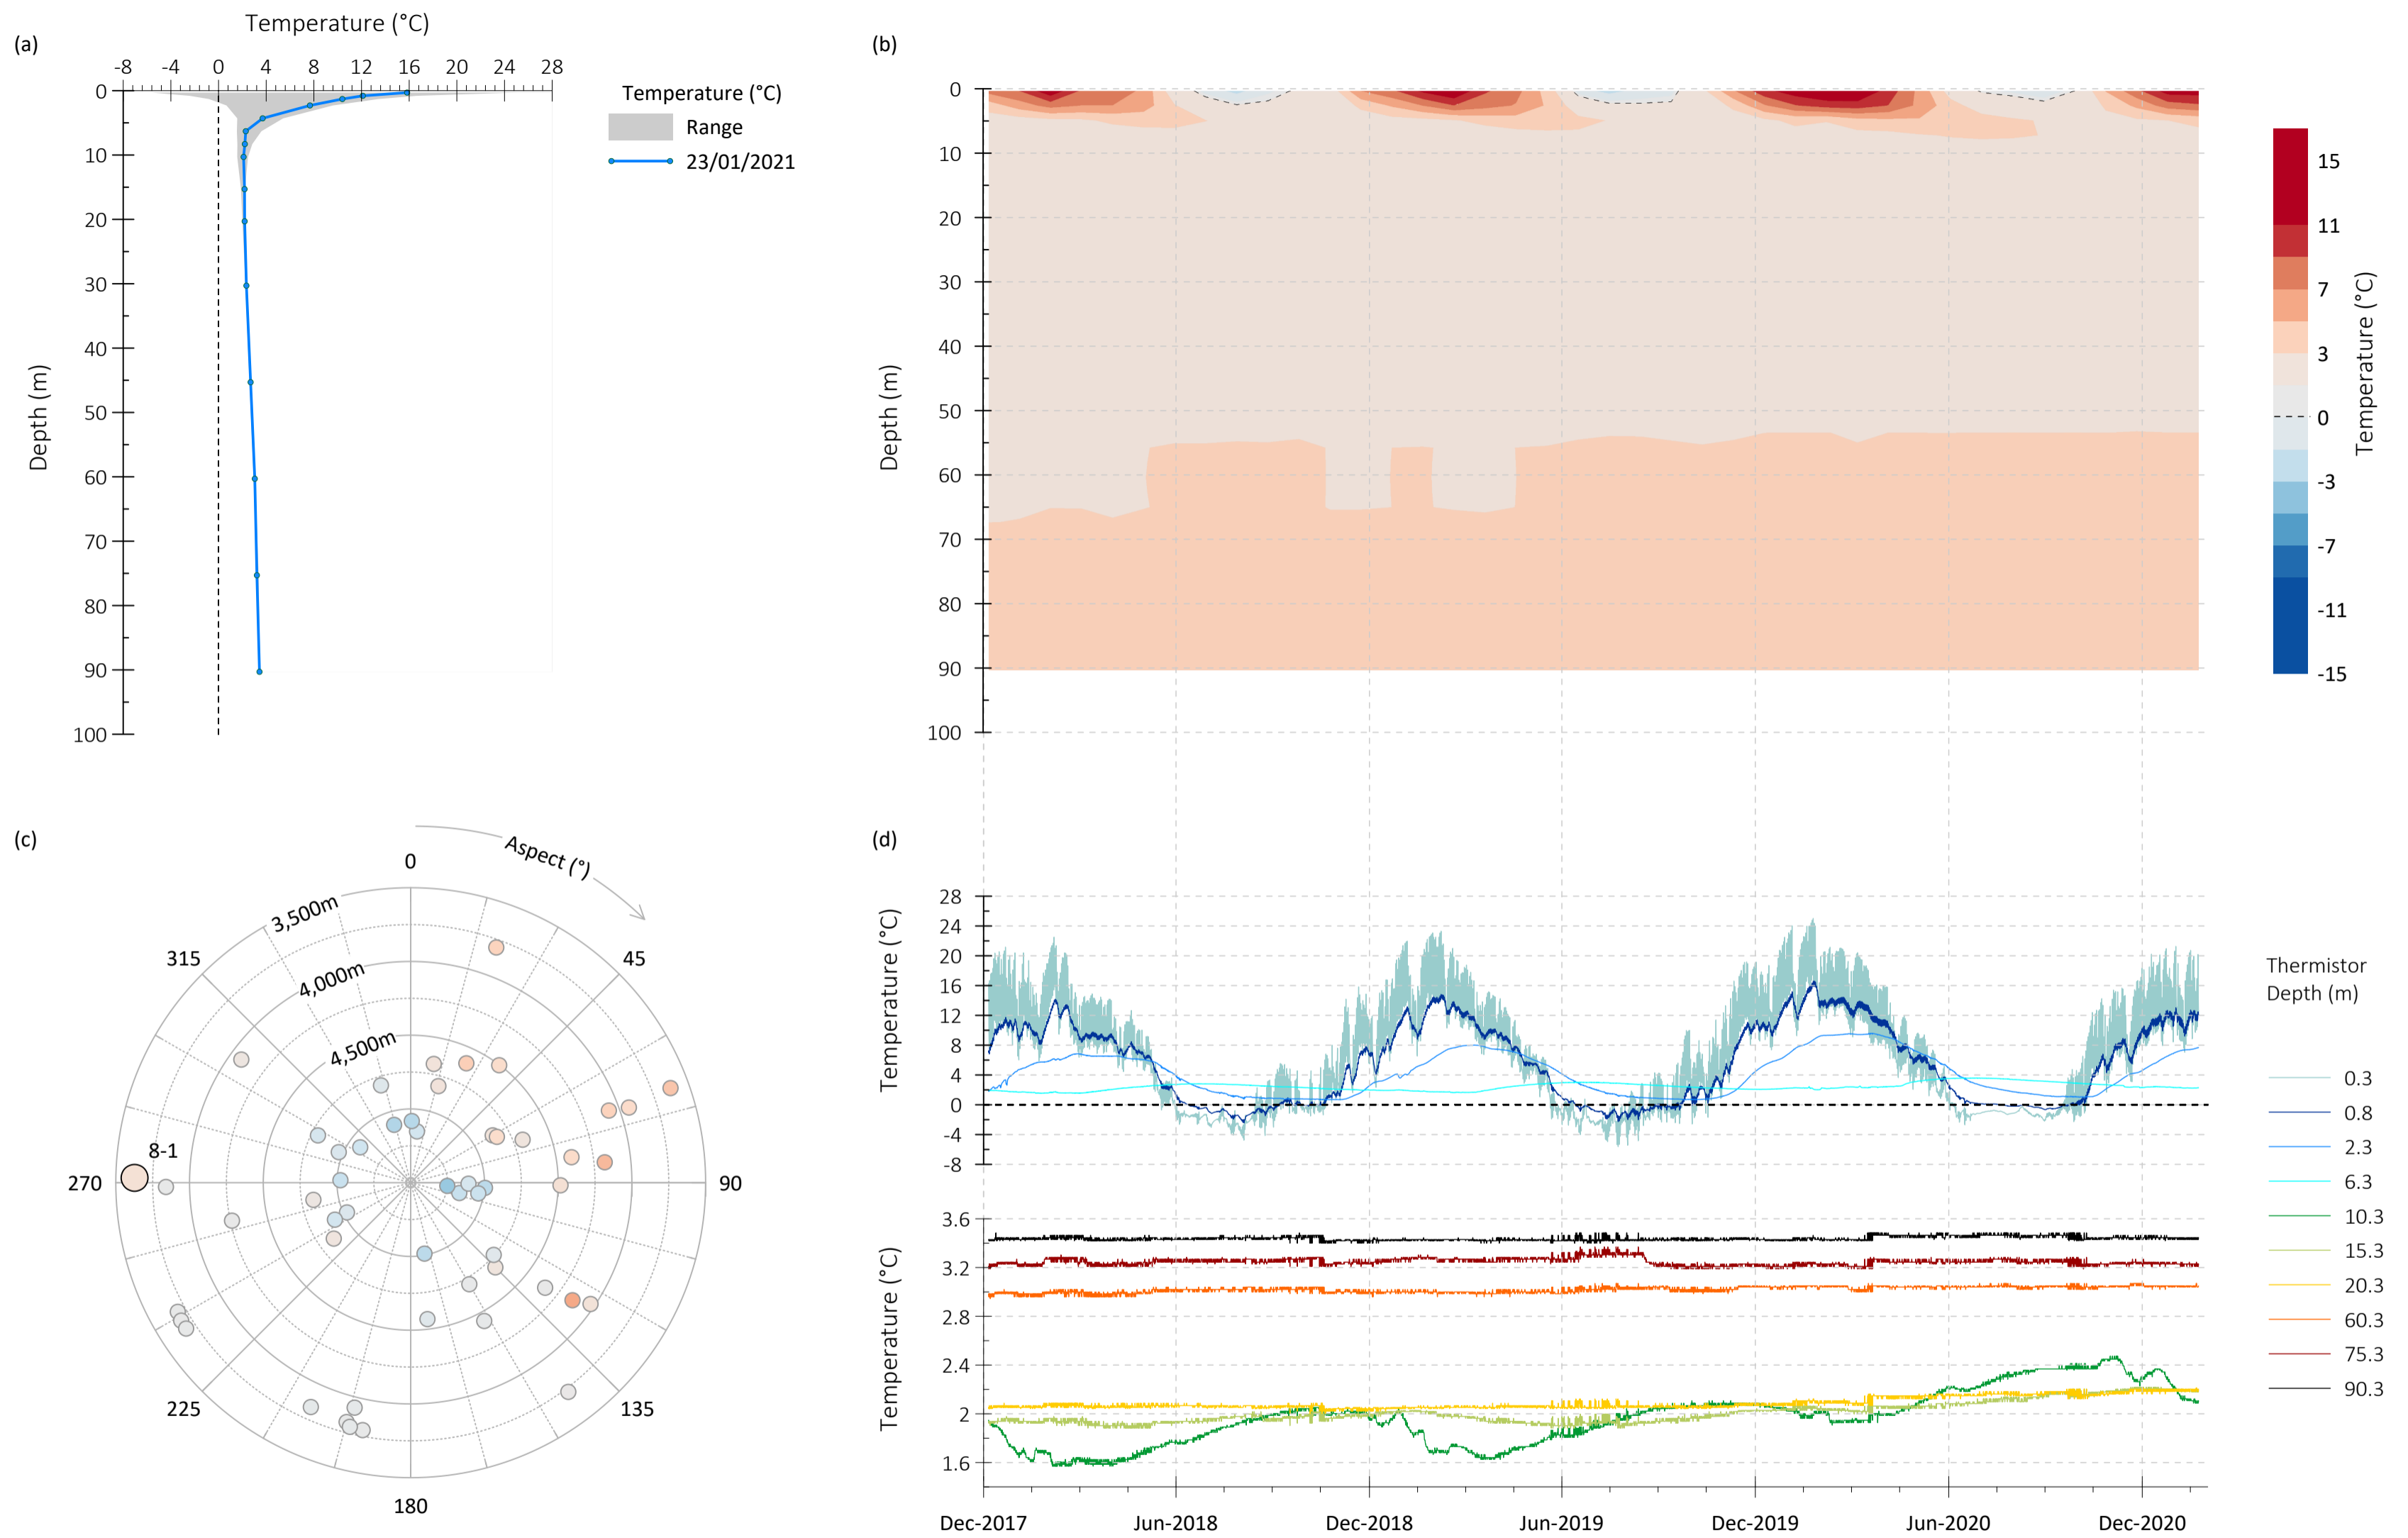

Figure S51: Ground thermal regime for Borehole 8-1 (El. = 3,627 m, Colluvium). Measurements collected approximately every 4 hours between 05/12/2017 and 23/01/2021.

(a) Temperature depth profile. Range estimated using hourly raw data. Daily average of most recent available measurements shown in blue.

(b) Interpreted borehole temperature evolution with time. Contours estimated from hourly raw data.

(c) Aspect-elevation-temperature diagram of most recent monthly temperatures below DZAA at all boreholes; colour scale same as plot (b). Borehole 8-1 ( $T = 2.19\text{ }^{\circ}\text{C}$ , depth=20.3 m) is indicated by enlarged symbol.

(d) Raw temperature time-series for selected depths at Borehole 8-1. Full dataset includes measurements from 15 sensors.

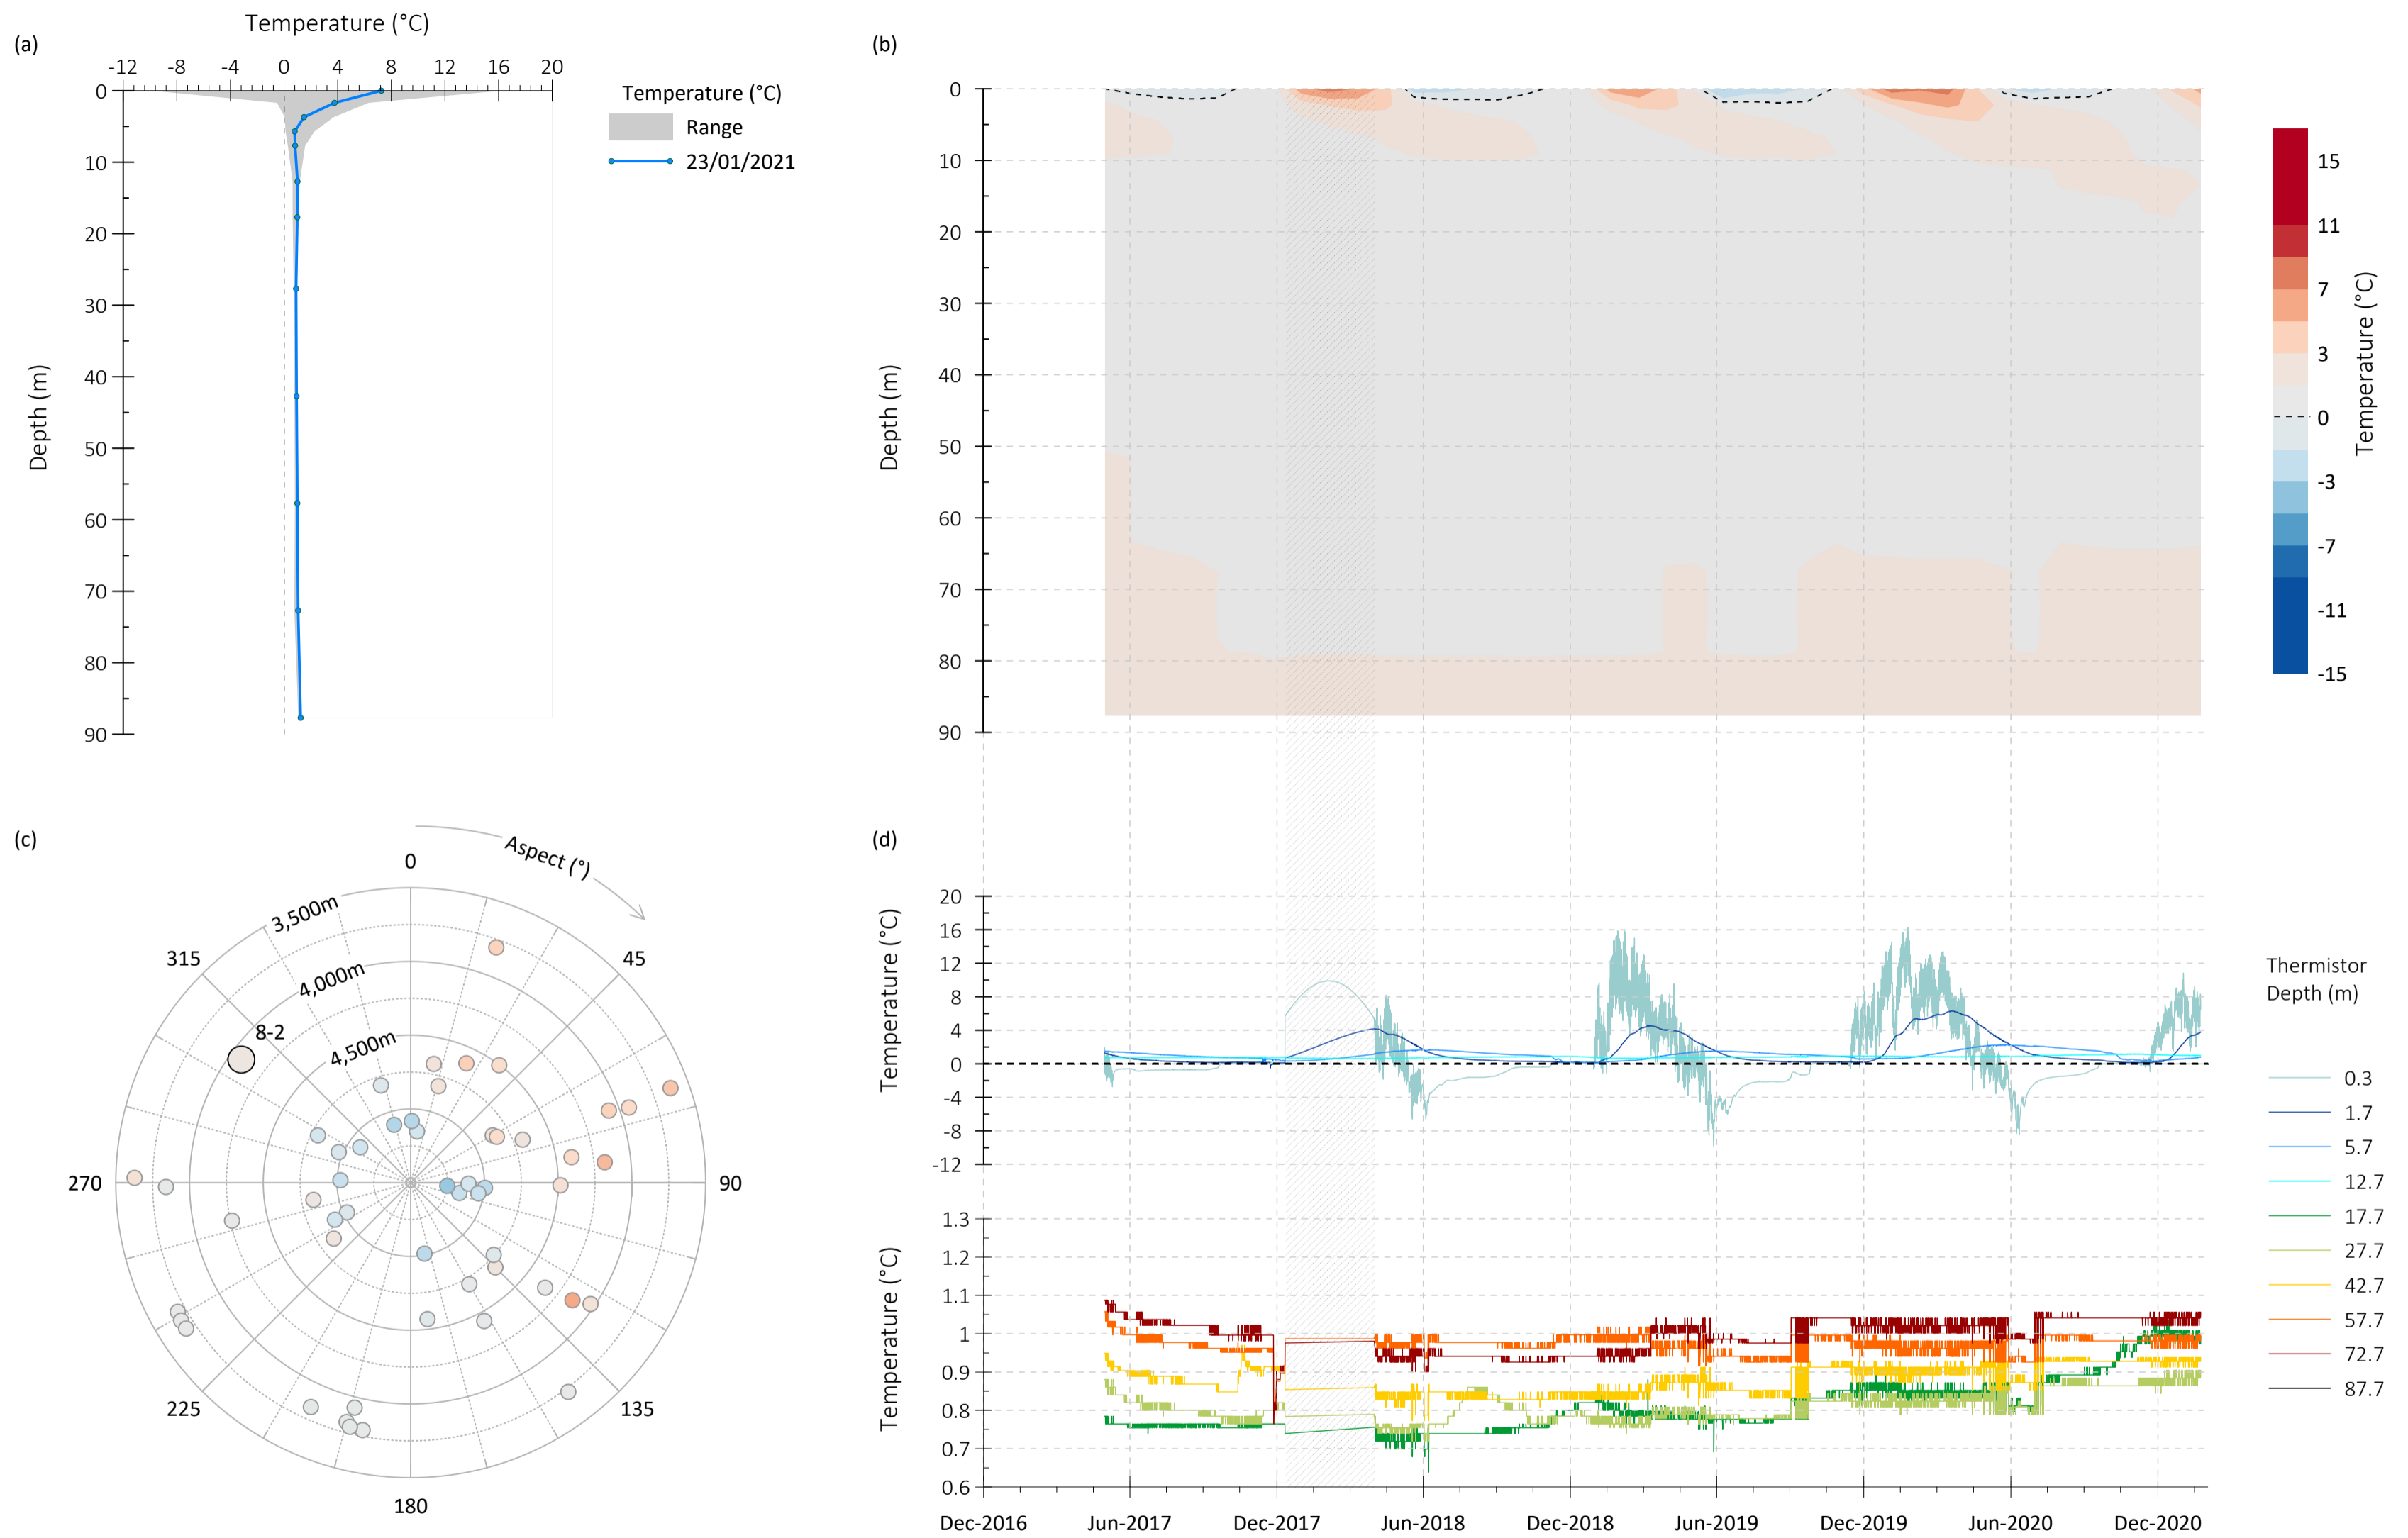

Figure S52: Ground thermal regime for Borehole 8-2 (El. = 4,080 m, Colluvium). Measurements collected approximately every 4 hours between 30/04/2017 and 23/01/2021. Interpolated data indicated by grey hatched areas.

(a) Temperature depth profile. Range estimated using hourly raw data and interpolated values. Daily average of most recent available measurements shown in blue.

(b) Interpreted borehole temperature evolution with time. Contours estimated from hourly raw data and interpolated values.

(c) Aspect-elevation-temperature diagram of most recent monthly temperatures below DZAA at all boreholes; colour scale same as plot (b). Borehole 8-2 ( $T = 0.99\text{ }^{\circ}\text{C}$ , depth=17.7 m) is indicated by enlarged symbol.

(d) Raw temperature time-series for selected depths at Borehole 8-2. Full dataset includes measurements from 12 sensors. Daily interpolated values are also shown.



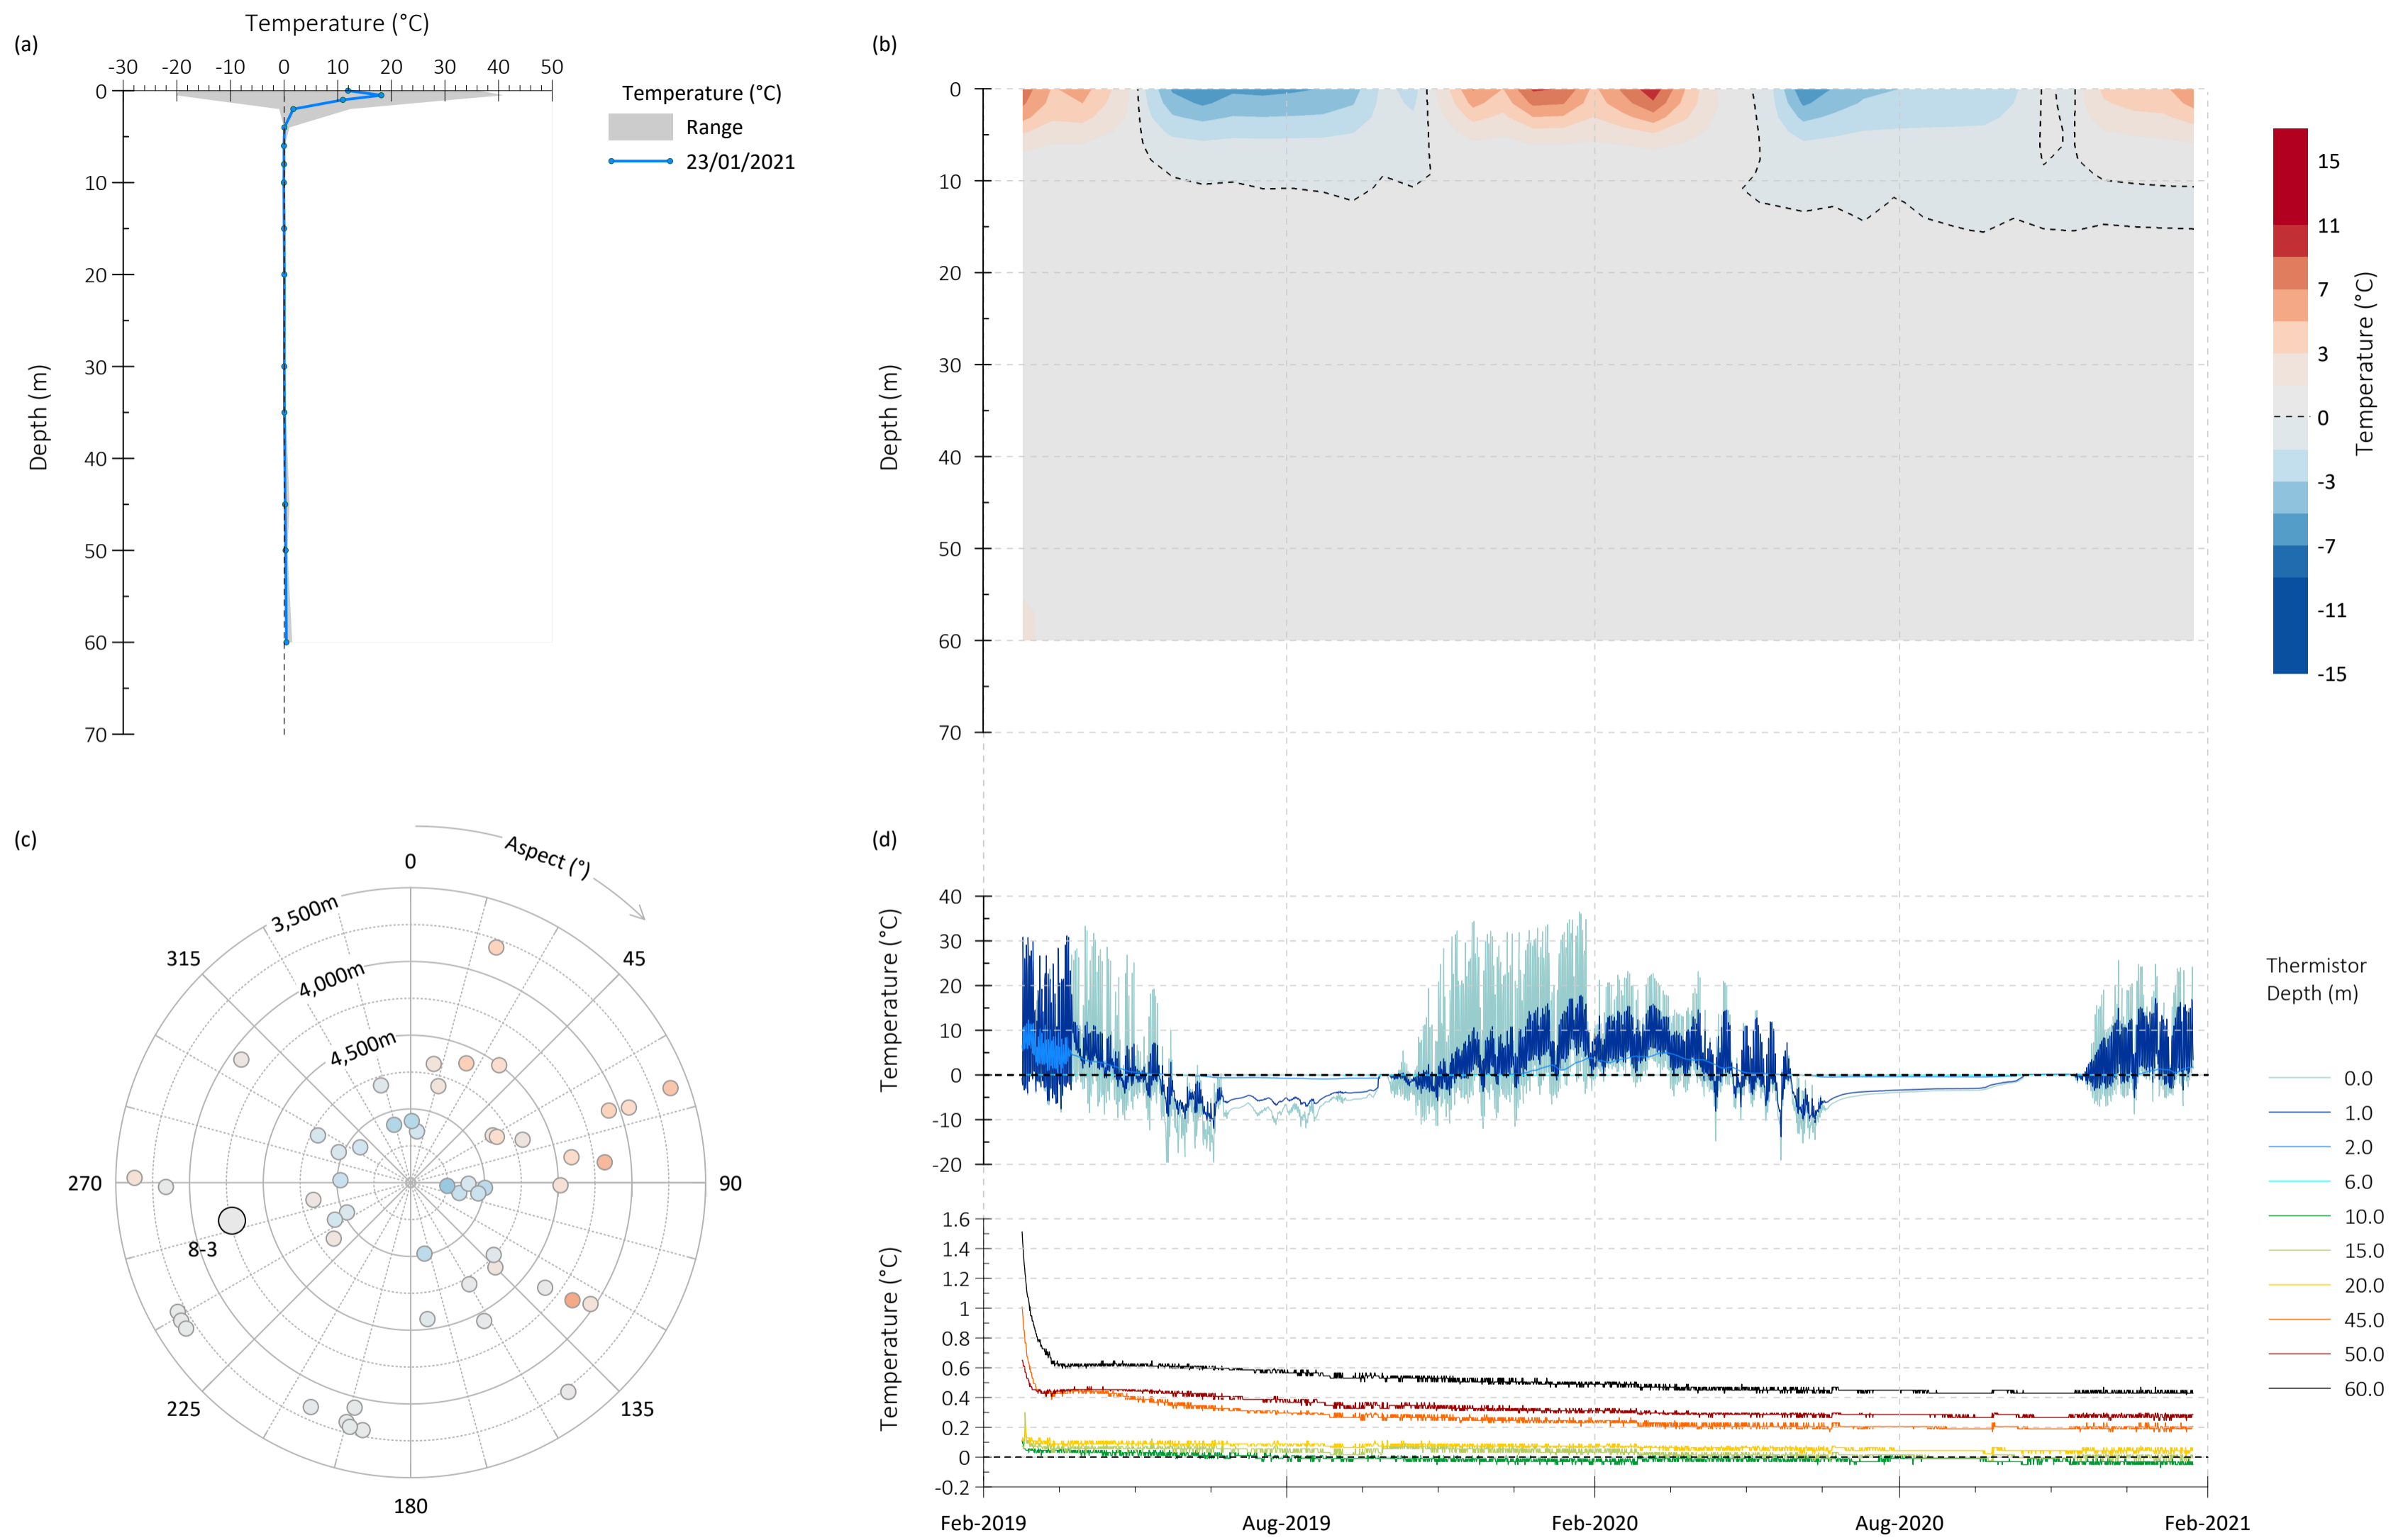

Figure S53: Ground thermal regime for Borehole 8-3 (El. = 4,261 m, Colluvium). Measurements collected approximately every 4 hours between 24/02/2019 and 23/01/2021. Early measurements affected by drilling.

(a) Temperature depth profile. Range estimated using hourly raw data. Daily average of most recent available measurements shown in blue.

(b) Interpreted borehole temperature evolution with time. Contours estimated from hourly raw data.

(c) Aspect-elevation-temperature diagram of most recent monthly temperatures below DZAA at all boreholes; colour scale same as plot (b). Borehole 8-3 ( $T = 0.05$  °C, depth=20 m) is indicated by enlarged symbol.

(d) Raw temperature time-series for selected depths at Borehole 8-3. Full dataset includes measurements from 15 sensors.
